# Supplementary material
Source: PubMed Central journal article supplement (PMC2084328)
Supplement: pnas_0706739104_3.pdf [file pnas_0706739104_3.pdf]

FT misc\_feature complement(36170..36171)  
 FT /label=NR12.M5.12  
 FT /note=NR12.M5.12, Exact (0), [SBW25 April 05],Plate=PM5.1,  
 Coordinates=E3, Trace=C467, [Oxford]  
 FT /colour=10  
 FT misc\_feature complement(102971..102972)  
 FT /label=NR12.10  
 FT /note=NR12.10, Exact (0), [SBW25 April 05],Plate=P01,  
 Coordinates=A20, Trace=q273, [UWGC]  
 FT /colour=7  
 FT misc\_feature 117913..117912  
 FT /label=NR09.76  
 FT /note=NR09.76, Estimate (372), [SBW25 April 05],Plate=P07,  
 Coordinates=F08, Trace=q427, [UWGC]  
 FT /colour=7  
 FT misc\_feature complement(140069..140070)  
 FT /label=NR18.33  
 FT /note=NR18.33, Exact (0), [SBW25 April 05],Plate=P01,  
 Coordinates=F17, Trace=q367, [UWGC]  
 FT /colour=7  
 FT misc\_feature complement(140145..140146)  
 FT /label=NR18.64  
 FT /note=NR18.64, Estimate (2), [SBW25 April 05],Plate=P01,  
 Coordinates=L7, Trace=q330, [UWGC]  
 FT /colour=7  
 FT misc\_feature complement(140182..140183)  
 FT /label=NR18.76  
 FT /note=NR18.76, Exact (0), [SBW25 April 05],Plate=P01,  
 Coordinates=N7, Trace=q331, [UWGC]  
 FT /colour=7  
 FT misc\_feature complement(140291..140292)  
 FT /label=NR18.54  
 FT /note=NR18.54, Exact (0), [SBW25 April 05],Plate=P01,  
 Coordinates=J11, Trace=q345, [UWGC]  
 FT /colour=7  
 FT misc\_feature complement(140298..140299)  
 FT /label=NR18.72  
 FT /note=NR18.72, Exact (0), [SBW25 April 05],Plate=P01,  
 Coordinates=L23, Trace=q394, [UWGC]  
 FT /colour=7  
 FT misc\_feature complement(140691..140692)  
 FT /label=NR18.28  
 FT /note=NR18.28, Exact (0), [SBW25 April 05],Plate=P01,  
 Coordinates=F7, Trace=q327, [UWGC]  
 FT /colour=7  
 FT misc\_feature complement(140717..140718)  
 FT /label=NR18.20  
 FT /note=NR18.20, Estimate (26), [SBW25 April 05],Plate=P01,  
 Coordinates=D15, Trace=q358, [UWGC]  
 FT /colour=7  
 FT misc\_feature complement(140795..140796)  
 FT /label=NR18.42  
 FT /note=NR18.42, Exact (0), [SBW25 April 05],Plate=P01,  
 Coordinates=H11, Trace=q344, [UWGC]  
 FT /colour=7  
 FT misc\_feature complement(141302..141303)  
 FT /label=NR18.07

FT /note=NR18.07, Exact (0), [SBW25 April 05],Plate=P01,  
Coordinates=B13, Trace=q349, [UWGC]  
FT /colour=7  
FT misc\_feature complement(141302..141303)  
FT /label=NR18.56  
FT /note=NR18.56, Exact (0), [SBW25 April 05],Plate=P01,  
Coordinates=J15, Trace=q361, [UWGC]  
FT /colour=7  
FT misc\_feature complement(141323..141324)  
FT /label=NR18.79  
FT /note=NR18.79, Exact (0), [SBW25 April 05],Plate=P01,  
Coordinates=N13, Trace=q355, [UWGC]  
FT /colour=7  
FT misc\_feature 141331..141330  
FT /label=NR18.87  
FT /note=NR18.87, Exact (0), [SBW25 April 05],Plate=P01,  
Coordinates=P5, Trace=q324, [UWGC]  
FT /colour=7  
FT misc\_feature complement(141349..141350)  
FT /label=NR18.49  
FT /note=NR18.49, Estimate (28), [SBW25 April 05],Plate=P01,  
Coordinates=J1, Trace=q305, [UWGC]  
FT /colour=7  
FT misc\_feature complement(141357..141358)  
FT /label=NR18.80  
FT /note=NR18.80, Estimate (492), [SBW25 April 05],Plate=P01,  
Coordinates=N15, Trace=q363, [UWGC]  
FT /colour=7  
FT misc\_feature 141374..141373  
FT /label=NR18.45  
FT /note=NR18.45, Estimate (32), [SBW25 April 05],Plate=P01,  
Coordinates=H17, Trace=q368, [UWGC]  
FT /colour=7  
FT misc\_feature 141376..141375  
FT /label=NR18.59  
FT /note=NR18.59, Exact (0), [SBW25 April 05],Plate=P01,  
Coordinates=J21, Trace=q385, [UWGC]  
FT /colour=7  
FT misc\_feature complement(141402..141403)  
FT /label=NR18.90  
FT /note=NR18.90, Estimate (69), [SBW25 April 05],Plate=P01,  
Coordinates=P11, Trace=q348, [UWGC]  
FT /colour=7  
FT misc\_feature 141406..141405  
FT /label=NR18.61  
FT /note=NR18.61, Exact (0), [SBW25 April 05],Plate=P01,  
Coordinates=L1, Trace=q306, [UWGC]  
FT /colour=7  
FT misc\_feature complement(141428..141429)  
FT /label=NR18.95  
FT /note=NR18.95, Estimate (29), [SBW25 April 05],Plate=P01,  
Coordinates=P21, Trace=q388, [UWGC]  
FT /colour=7  
FT misc\_feature 141429..141428  
FT /label=NR18.35  
FT /note=NR18.35, Exact (0), [SBW25 April 05],Plate=P01,  
Coordinates=F21, Trace=q383, [UWGC]

FT /colour=7  
FT misc\_feature complement(141446..141447)  
FT /label=NR18.55  
FT /note=NR18.55, Estimate (31), [SBW25 April 05],Plate=P01,  
Coordinates=J13, Trace=q353, [UWGC]  
FT /colour=7  
FT misc\_feature 141457..141456  
FT /label=NR18.09  
FT /note=NR18.09, Exact (0), [SBW25 April 05],Plate=P01,  
Coordinates=B17, Trace=q365, [UWGC]  
FT /colour=7  
FT misc\_feature 141469..141468  
FT /label=NR18.70  
FT /note=NR18.70, Estimate (0), [SBW25 April 05],Plate=P01,  
Coordinates=L19, Trace=q378, [UWGC]  
FT /colour=7  
FT misc\_feature 141488..141487  
FT /label=NR18.01  
FT /note=NR18.01, Exact (0), [SBW25 April 05],Plate=P01,  
Coordinates=B1, Trace=q301, [UWGC]  
FT /colour=7  
FT misc\_feature 141488..141487  
FT /label=NR18.58  
FT /note=NR18.58, Exact (0), [SBW25 April 05],Plate=P01,  
Coordinates=J19, Trace=q377, [UWGC]  
FT /colour=7  
FT misc\_feature 141488..141487  
FT /label=NR18.63  
FT /note=NR18.63, Exact (0), [SBW25 April 05],Plate=P01,  
Coordinates=L5, Trace=q322, [UWGC]  
FT /colour=7  
FT misc\_feature complement(141489..141490)  
FT /label=NR18.14  
FT /note=NR18.14, Exact (0), [SBW25 April 05],Plate=P01,  
Coordinates=D3, Trace=q310, [UWGC]  
FT /colour=7  
FT misc\_feature complement(141489..141490)  
FT /label=NR18.77  
FT /note=NR18.77, Exact (0), [SBW25 April 05],Plate=P01,  
Coordinates=N9, Trace=q339, [UWGC]  
FT /colour=7  
FT misc\_feature 141500..141499  
FT /label=NR18.05  
FT /note=NR18.05, Exact (0), [SBW25 April 05],Plate=P01,  
Coordinates=B9, Trace=q333, [UWGC]  
FT /colour=7  
FT misc\_feature complement(141505..141506)  
FT /label=NR18.38  
FT /note=NR18.38, Estimate (28), [SBW25 April 05],Plate=P01,  
Coordinates=H3, Trace=q312, [UWGC]  
FT /colour=7  
FT misc\_feature complement(141507..141508)  
FT /label=NR18.18  
FT /note=NR18.18, Estimate (43), [SBW25 April 05],Plate=P01,  
Coordinates=D11, Trace=q342, [UWGC]  
FT /colour=7  
FT misc\_feature complement(141511..141512)

FT /label=NR18.81  
FT /note=NR18.81, Estimate (34), [SBW25 April 05],Plate=P01,  
Coordinates=N17, Trace=q371, [UWGC]  
FT /colour=7  
FT misc\_feature 141516..141515  
FT /label=NR18.30  
FT /note=NR18.30, Exact (0), [SBW25 April 05],Plate=P01,  
Coordinates=F11, Trace=q343, [UWGC]  
FT /colour=7  
FT misc\_feature complement(141516..141517)  
FT /label=NR18.85  
FT /note=NR18.85, Estimate (27), [SBW25 April 05],Plate=P01,  
Coordinates=P1, Trace=q308, [UWGC]  
FT /colour=7  
FT misc\_feature complement(141527..141528)  
FT /label=NR18.37  
FT /note=NR18.37, Exact (0), [SBW25 April 05],Plate=P01,  
Coordinates=H1, Trace=q304, [UWGC]  
FT /colour=7  
FT misc\_feature complement(141532..141533)  
FT /label=NR18.04  
FT /note=NR18.04, Estimate (32), [SBW25 April 05],Plate=P01,  
Coordinates=B7, Trace=q325, [UWGC]  
FT /colour=7  
FT misc\_feature complement(141600..141601)  
FT /label=NR18.15  
FT /note=NR18.15, Estimate (33), [SBW25 April 05],Plate=P01,  
Coordinates=D5, Trace=q318, [UWGC]  
FT /colour=7  
FT misc\_feature complement(142215..142216)  
FT /label=NR18.69  
FT /note=NR18.69, Exact (0), [SBW25 April 05],Plate=P01,  
Coordinates=L17, Trace=q370, [UWGC]  
FT /colour=7  
FT misc\_feature complement(142240..142241)  
FT /label=NR18.19  
FT /note=NR18.19, Estimate (25), [SBW25 April 05],Plate=P01,  
Coordinates=D13, Trace=q350, [UWGC]  
FT /colour=7  
FT misc\_feature 143122..143121  
FT /label=NR18.44  
FT /note=NR18.44, Estimate (2), [SBW25 April 05],Plate=P01,  
Coordinates=H15, Trace=q360, [UWGC]  
FT /colour=7  
FT misc\_feature 143129..143128  
FT /label=NR18.50  
FT /note=NR18.50, Exact (0), [SBW25 April 05],Plate=P01,  
Coordinates=J3, Trace=q313, [UWGC]  
FT /colour=7  
FT misc\_feature complement(143165..143166)  
FT /label=NR18.08  
FT /note=NR18.08, Exact (0), [SBW25 April 05],Plate=P01,  
Coordinates=B15, Trace=q357, [UWGC]  
FT /colour=7  
FT misc\_feature complement(143169..143170)  
FT /label=NR18.68

FT /note=NR18.68, Estimate (1), [SBW25 April 05],Plate=P01,  
Coordinates=L15, Trace=q362, [UWGC]  
FT /colour=7  
FT misc\_feature complement(143170..143171)  
FT /label=NR18.91  
FT /note=NR18.91, Exact (0), [SBW25 April 05],Plate=P01,  
Coordinates=P13, Trace=q356, [UWGC]  
FT /colour=7  
FT misc\_feature 143178..143177  
FT /label=NR18.96  
FT /note=NR18.96, Estimate (35), UWGC re-mapped on dapB  
deleted genome, [SBW25 April 05],Plate=P01, Coordinates=P23, Trace=q396, [UWGC]  
FT /colour=7  
FT misc\_feature complement(143187..143188)  
FT /label=NR18.24  
FT /note=NR18.24, Exact (0), [SBW25 April 05],Plate=P01,  
Coordinates=D23, Trace=q390, [UWGC]  
FT /colour=7  
FT misc\_feature complement(143187..143188)  
FT /label=NR18.67  
FT /note=NR18.67, Exact (0), [SBW25 April 05],Plate=P01,  
Coordinates=L13, Trace=q354, [UWGC]  
FT /colour=7  
FT misc\_feature complement(143197..143198)  
FT /label=NR18.40  
FT /note=NR18.40, Exact (0), [SBW25 April 05],Plate=P01,  
Coordinates=H7, Trace=q328, [UWGC]  
FT /colour=7  
FT misc\_feature complement(143197..143198)  
FT /label=NR18.53  
FT /note=NR18.53, Exact (0), [SBW25 April 05],Plate=P01,  
Coordinates=J9, Trace=q337, [UWGC]  
FT /colour=7  
FT misc\_feature complement(143197..143198)  
FT /label=NR18.60  
FT /note=NR18.60, Exact (0), [SBW25 April 05],Plate=P01,  
Coordinates=J23, Trace=q393, [UWGC]  
FT /colour=7  
FT misc\_feature complement(143201..143202)  
FT /label=NR18.31  
FT /note=NR18.31, Estimate (0), [SBW25 April 05],Plate=P01,  
Coordinates=F13, Trace=q351, [UWGC]  
FT /colour=7  
FT misc\_feature complement(143202..143203)  
FT /label=NR18.25  
FT /note=NR18.25, Exact (0), [SBW25 April 05],Plate=P01,  
Coordinates=F1, Trace=q303, [UWGC]  
FT /colour=7  
FT misc\_feature complement(143207..143208)  
FT /label=NR18.21  
FT /note=NR18.21, Exact (0), [SBW25 April 05],Plate=P01,  
Coordinates=D17, Trace=q366, [UWGC]  
FT /colour=7  
FT misc\_feature complement(143207..143208)  
FT /label=NR18.57  
FT /note=NR18.57, Exact (0), [SBW25 April 05],Plate=P01,  
Coordinates=J17, Trace=q369, [UWGC]

FT /colour=7  
 FT misc\_feature 143211..143210  
 FT /label=NR18.52  
 FT /note=NR18.52, Exact (0), [SBW25 April 05],Plate=P01,  
 Coordinates=J7, Trace=q329, [UWGC]  
 FT /colour=7  
 FT misc\_feature 143211..143210  
 FT /label=NR18.92  
 FT /note=NR18.92, Exact (0), [SBW25 April 05],Plate=P01,  
 Coordinates=P15, Trace=q364, [UWGC]  
 FT /colour=7  
 FT misc\_feature 143212..143211  
 FT /label=NR18.10  
 FT /note=NR18.10, Estimate (2), [SBW25 April 05],Plate=P01,  
 Coordinates=B19, Trace=q373, [UWGC]  
 FT /colour=7  
 FT misc\_feature 143212..143211  
 FT /label=NR18.46  
 FT /note=NR18.46, Estimate (0), [SBW25 April 05],Plate=P01,  
 Coordinates=H19, Trace=q376, [UWGC]  
 FT /colour=7  
 FT misc\_feature 143213..143212  
 FT /label=NR18.16  
 FT /note=NR18.16, Exact (0), [SBW25 April 05],Plate=P01,  
 Coordinates=D7, Trace=q326, [UWGC]  
 FT /colour=7  
 FT misc\_feature 143213..143212  
 FT /label=NR18.39  
 FT /note=NR18.39, Exact (manual correction), [SBW25 April  
 05],Plate=P01, Coordinates=H5, Trace=q320, [Oxford]  
 FT /colour=7  
 FT misc\_feature 143213..143212  
 FT /label=NR18.66  
 FT /note=NR18.66, Exact (0), [SBW25 April 05],Plate=P01,  
 Coordinates=L11, Trace=q346, [UWGC]  
 FT /colour=7  
 FT misc\_feature complement(143222..143223)  
 FT /label=NR18.48  
 FT /note=NR18.48, Exact (0), [SBW25 April 05],Plate=P01,  
 Coordinates=H23, Trace=q392, [UWGC]  
 FT /colour=7  
 FT misc\_feature complement(143222..143223)  
 FT /label=NR18.65  
 FT /note=NR18.65, Exact (0), [SBW25 April 05],Plate=P01,  
 Coordinates=L9, Trace=q338, [UWGC]  
 FT /colour=7  
 FT misc\_feature complement(143222..143223)  
 FT /label=NR18.73  
 FT /note=NR18.73, Exact (0), [SBW25 April 05],Plate=P01,  
 Coordinates=N1, Trace=q307, [UWGC]  
 FT /colour=7  
 FT misc\_feature complement(143222..143223)  
 FT /label=NR18.86  
 FT /note=NR18.86, Exact (0), [SBW25 April 05],Plate=P01,  
 Coordinates=P3, Trace=q316, [UWGC]  
 FT /colour=7  
 FT misc\_feature complement(143222..143223)

FT /label=NR18.94  
FT /note=NR18.94, Exact (0), [SBW25 April 05],Plate=P01,  
Coordinates=P19, Trace=q380, [UWGC]  
FT /colour=7  
FT misc\_feature complement(143224..143225)  
FT /label=NR18.17  
FT /note=NR18.17, Exact (0), [SBW25 April 05],Plate=P01,  
Coordinates=D9, Trace=q334, [UWGC]  
FT /colour=7  
FT misc\_feature complement(143224..143225)  
FT /label=NR18.27  
FT /note=NR18.27, Exact (0), [SBW25 April 05],Plate=P01,  
Coordinates=F5, Trace=q319, [UWGC]  
FT /colour=7  
FT misc\_feature complement(143225..143226)  
FT /label=NR18.47  
FT /note=NR18.47, Estimate (1), [SBW25 April 05],Plate=P01,  
Coordinates=H21, Trace=q384, [UWGC]  
FT /colour=7  
FT misc\_feature 143232..143231  
FT /label=NR18.74  
FT /note=NR18.74, Estimate (1), [SBW25 April 05],Plate=P01,  
Coordinates=N3, Trace=q315, [UWGC]  
FT /colour=7  
FT misc\_feature complement(143234..143235)  
FT /label=NR18.22  
FT /note=NR18.22, Estimate (31), [SBW25 April 05],Plate=P01,  
Coordinates=D19, Trace=q374, [UWGC]  
FT /colour=7  
FT misc\_feature complement(143255..143256)  
FT /label=NR18.12  
FT /note=NR18.12, Estimate (31), [SBW25 April 05],Plate=P01,  
Coordinates=B23, Trace=q389, [UWGC]  
FT /colour=7  
FT misc\_feature complement(143255..143256)  
FT /label=NR18.13  
FT /note=NR18.13, Exact (0), [SBW25 April 05],Plate=P01,  
Coordinates=D1, Trace=q302, [UWGC]  
FT /colour=7  
FT misc\_feature 143265..143264  
FT /label=NR18.82  
FT /note=NR18.82, Exact (0), [SBW25 April 05],Plate=P01,  
Coordinates=N19, Trace=q379, [UWGC]  
FT /colour=7  
FT misc\_feature 143265..143264  
FT /label=NR18.89  
FT /note=NR18.89, Exact (0), [SBW25 April 05],Plate=P01,  
Coordinates=P9, Trace=q340, [UWGC]  
FT /colour=7  
FT misc\_feature complement(143268..143269)  
FT /label=NR18.71  
FT /note=NR18.71, Estimate (4), [SBW25 April 05],Plate=P01,  
Coordinates=L21, Trace=q386, [UWGC]  
FT /colour=7  
FT misc\_feature complement(143276..143277)  
FT /label=NR18.03

FT /note=NR18.03, Exact (0), [SBW25 April 05],Plate=P01,  
 Coordinates=B5, Trace=q317, [UWGC]  
 FT /colour=7  
 FT misc\_feature complement(143276..143277)  
 FT /label=NR18.62  
 FT /note=NR18.62, Exact (0), [SBW25 April 05],Plate=P01,  
 Coordinates=L3, Trace=q314, [UWGC]  
 FT /colour=7  
 FT misc\_feature complement(143276..143277)  
 FT /label=NR18.78  
 FT /note=NR18.78, Exact (0), [SBW25 April 05],Plate=P01,  
 Coordinates=N11, Trace=q347, [UWGC]  
 FT /colour=7  
 FT misc\_feature complement(143276..143277)  
 FT /label=NR18.83  
 FT /note=NR18.83, Exact (0), [SBW25 April 05],Plate=P01,  
 Coordinates=N21, Trace=q387, [UWGC]  
 FT /colour=7  
 FT misc\_feature 143309..143308  
 FT /label=NR18.88  
 FT /note=NR18.88, Exact (0), UWGC re-mapped on dapB deleted  
 genome, [SBW25 April 05],Plate=P01, Coordinates=P7, Trace=q332, [UWGC]  
 FT /colour=7  
 FT misc\_feature complement(143309..143310)  
 FT /label=NR18.23  
 FT /note=NR18.23, Estimate (33), [SBW25 April 05],Plate=P01,  
 Coordinates=D21, Trace=q382, [UWGC]  
 FT /colour=7  
 FT misc\_feature complement(143320..143321)  
 FT /label=NR18.02  
 FT /note=NR18.02, Exact (0), [SBW25 April 05],Plate=P01,  
 Coordinates=B3, Trace=q309, [UWGC]  
 FT /colour=7  
 FT misc\_feature 143338..143337  
 FT /label=NR18.84  
 FT /note=NR18.84, Exact (0), UWGC re-mapped on dapB deleted  
 genome, [SBW25 April 05],Plate=P01, Coordinates=N23, Trace=q395, [UWGC]  
 FT /colour=7  
 FT misc\_feature complement(143349..143350)  
 FT /label=NR18.51  
 FT /note=NR18.51, Exact (0), [SBW25 April 05],Plate=P01,  
 Coordinates=J5, Trace=q321, [UWGC]  
 FT /colour=7  
  
 FT misc\_feature complement(143355..143356)  
 FT /label=NR18.34  
 FT /note=NR18.34, Estimate (32), [SBW25 April 05],Plate=P01,  
 Coordinates=F19, Trace=q375, [UWGC]  
 FT /colour=7  
 FT misc\_feature 143357..143356  
 FT /label=NR18.75  
 FT /note=NR18.75, Exact (manual correction), [SBW25 April  
 05],Plate=P01, Coordinates=N5, Trace=q323, [UWGC]  
 FT /colour=7  
 FT misc\_feature complement(143359..143360)  
 FT /label=NR18.29



FT /note=NR18.29, Estimate (7), [SBW25 April 05],Plate=P01,  
Coordinates=F9, Trace=q335, [UWGC]  
FT /colour=7  
FT misc\_feature 143370..143369  
FT /label=NR18.11  
FT /note=NR18.11,MCS hit =  
^GATCTGCAGGTCGAGCGCTTAATTAAGTAGTCGAGTTGGGTATG, [SBW25 April 05],Plate=P01,  
Coordinates=B21, Trace=q381, [UWGC]  
FT /colour=7  
FT misc\_feature complement(143371..143372)  
FT /label=NR18.43  
FT /note=NR18.43, Exact (manual correction), [SBW25 April  
05],Plate=P01, Coordinates=H13, Trace=q352, [UWGC]  
FT /colour=7  
FT misc\_feature 157980..157979  
FT /label=NR12.M5.02  
FT /note=NR12.M5.02, Exact (0), [SBW25 April 05],Plate=PM5.1,  
Coordinates=D5, Trace=C482, [Oxford]  
FT /colour=10  
FT misc\_feature complement(228403..228404)  
FT /label=NR54.116  
FT /note=NR54.116, Estimate (6), [SBW25 April 05],Plate=P07,  
Coordinates=A24, Trace=q289, [UWGC]  
FT /colour=7  
FT misc\_feature 237513..237512  
FT /label=NR53.M5.09  
FT /note=NR53.M5.09, Exact (0), [SBW25 April 05],Plate=PM5.2,  
Coordinates=D7, Trace=C595, [Oxford]  
FT /colour=10  
FT misc\_feature 243751..243750  
FT /label=NR51.M5.01  
FT /note=NR51.M5.01, Exact (0), [SBW25 April 05],Plate=PM5.2,  
Coordinates=C7, Trace=C594, [Oxford]  
FT /colour=10  
FT misc\_feature complement(327168..327169)  
FT /label=NR09.63  
FT /note=NR09.63, Exact (manual correction), [SBW25 April  
05],Plate=P07, Coordinates=I07, Trace=q129, [UWGC]  
FT /colour=7  
FT misc\_feature 327178..327177  
FT /label=NR09.62  
FT /note=NR09.62, Exact (manual correction), [SBW25 April  
05],Plate=P07, Coordinates=H07, Trace=q328, [UWGC]  
FT /colour=7  
FT misc\_feature 327178..327177  
FT /label=NR09.82  
FT /note=NR09.82, Exact (manual correction), [SBW25 April  
05],Plate=P07, Coordinates=L08, Trace=q430, [UWGC]  
FT /colour=7  
FT misc\_feature 327239..327238  
FT /label=NR09.94  
FT /note=NR09.94, Exact (manual correction), [SBW25 April  
05],Plate=P07, Coordinates=H09, Trace=q336, [UWGC]  
FT /colour=7  
FT misc\_feature complement(328529..328530)  
FT /label=NR09.12

FT /note=NR09.12, Estimate (0), [SBW25 April 05],Plate=P07,  
Coordinates=F04, Trace=q411, [UWGC]  
FT /colour=7  
FT misc\_feature complement(328529..328530)  
FT /label=NR09.21  
FT /note=NR09.21, Estimate (0), [SBW25 April 05],Plate=P07,  
Coordinates=O04, Trace=q216, [UWGC]  
FT /colour=7  
FT misc\_feature complement(328813..328814)  
FT /label=NR09.75  
FT /note=NR09.75, Estimate (4), [SBW25 April 05],Plate=P07,  
Coordinates=E08, Trace=q227, [UWGC]  
FT /colour=7  
FT misc\_feature complement(328815..328816)  
FT /label=NR09.11  
FT /note=NR09.11, Exact (manual correction), [SBW25 April  
05],Plate=P07, Coordinates=E04, Trace=q211, [UWGC]  
FT /colour=7  
FT misc\_feature 329143..329142  
FT /label=NR30.49  
FT /note=NR30.49, Exact (0), [SBW25 April 05],Plate=P01,  
Coordinates=J2, Trace=q405, [UWGC]  
FT /colour=7  
FT misc\_feature 329144..329143  
FT /label=NR30.77  
FT /note=NR30.77, Exact (0), [SBW25 April 05],Plate=P01,  
Coordinates=N10, Trace=q439, [UWGC]  
FT /colour=7  
FT misc\_feature complement(329163..329164)  
FT /label=NR30.45  
FT /note=NR30.45, Estimate (0), UWGC re-mapped on dapB deleted  
genome, [SBW25 April 05],Plate=P01, Coordinates=H18, Trace=q468, [UWGC]  
FT /colour=7  
FT misc\_feature complement(329164..329165)  
FT /label=NR30.03  
FT /note=NR30.03, Exact (0), UWGC re-mapped on dapB deleted  
genome, [SBW25 April 05],Plate=P01, Coordinates=B6, Trace=q417, [UWGC]  
FT /colour=7  
FT misc\_feature complement(329164..329165)  
FT /label=NR30.M5.01  
FT /note=NR30.M5.01, Exact (0), [SBW25 April 05],Plate=PM5.1,  
Coordinates=F5, Trace=C484, [Oxford]  
FT /colour=10  
FT misc\_feature 329183..329182  
FT /label=NR30.38  
FT /note=NR30.38, Exact (0), [SBW25 April 05],Plate=P01,  
Coordinates=H4, Trace=q412, [UWGC]  
FT /colour=7  
FT misc\_feature 329183..329182  
FT /label=NR30.53  
FT /note=NR30.53, Exact (0), [SBW25 April 05],Plate=P01,  
Coordinates=J10, Trace=q437, [UWGC]  
FT /colour=7  
FT misc\_feature 329191..329190  
FT /label=NR30.26  
FT /note=NR30.26, Exact (0), [SBW25 April 05],Plate=P01,  
Coordinates=F4, Trace=q411, [UWGC]

FT /colour=7  
 FT misc\_feature complement(329194..329195)  
 FT /label=NR30.04  
 FT /note=NR30.04, Exact (0), [SBW25 April 05],Plate=P01,  
 Coordinates=B8, Trace=q425, [UWGC]  
 FT /colour=7  
 FT misc\_feature complement(329194..329195)  
 FT /label=NR30.36  
 FT /note=NR30.36, Exact (0), [SBW25 April 05],Plate=P01,  
 Coordinates=F24, Trace=q491, [UWGC]  
 FT /colour=7  
 FT misc\_feature complement(329194..329195)  
 FT /label=NR30.67  
 FT /note=NR30.67, Exact (0), [SBW25 April 05],Plate=P01,  
 Coordinates=L14, Trace=q454, [UWGC]  
 FT /colour=7  
 FT misc\_feature complement(329195..329196)  
 FT /label=NR30.83  
 FT /note=NR30.83, Exact (0), [SBW25 April 05],Plate=P01,  
 Coordinates=N22, Trace=q487, [UWGC]  
 FT /colour=7  
 FT misc\_feature 329206..329205  
 FT /label=NR30.54  
 FT /note=NR30.54, Exact (0), [SBW25 April 05],Plate=P01,  
 Coordinates=J12, Trace=q445, [UWGC]  
 FT /colour=7  
 FT misc\_feature 329206..329205  
 FT /label=NR30.70  
 FT /note=NR30.70, Exact (0), [SBW25 April 05],Plate=P01,  
 Coordinates=L20, Trace=q478, [UWGC]  
 FT /colour=7  
 FT misc\_feature complement(329217..329218)  
 FT /label=NR30.19  
 FT /note=NR30.19, Exact (0), [SBW25 April 05],Plate=P01,  
 Coordinates=D14, Trace=q450, [UWGC]  
 FT /colour=7  
 FT misc\_feature complement(329225..329226)  
 FT /label=NR30.71  
 FT /note=NR30.71, Estimate (30), UWGC re-mapped on dapB  
 deleted genome, [SBW25 April 05],Plate=P01, Coordinates=L22, Trace=q486, [UWGC]  
 FT /colour=7  
 FT misc\_feature complement(329251..329252)  
 FT /label=NR30.73  
 FT /note=NR30.73, Exact (0), [SBW25 April 05],Plate=P01,  
 Coordinates=N2, Trace=q407, [UWGC]  
 FT /colour=7  
 FT misc\_feature complement(329268..329269)  
 FT /label=NR30.64  
 FT /note=NR30.64, Exact (0), [SBW25 April 05],Plate=P01,  
 Coordinates=L8, Trace=q430, [UWGC]  
 FT /colour=7  
 FT misc\_feature 329289..329288  
 FT /label=NR30.75  
 FT /note=NR30.75, Exact (0), [SBW25 April 05],Plate=P01,  
 Coordinates=N6, Trace=q423, [UWGC]  
 FT /colour=7  
 FT misc\_feature 329323..329322

FT /label=NR30.46  
 FT /note=NR30.46, Estimate (31), [SBW25 April 05],Plate=P01,  
 Coordinates=H20, Trace=q476, [UWGC]  
 FT /colour=7  
 FT misc\_feature 329344..329343  
 FT /label=NR30.82  
 FT /note=NR30.82, Estimate (10), [SBW25 April 05],Plate=P01,  
 Coordinates=N20, Trace=q479, [UWGC]  
 FT /colour=7  
 FT misc\_feature 329353..329352  
 FT /label=NR30.50  
 FT /note=NR30.50, Estimate (1), [SBW25 April 05],Plate=P01,  
 Coordinates=J4, Trace=q413, [UWGC]  
 FT /colour=7  
 FT misc\_feature 329353..329352  
 FT /label=NR30.86  
 FT /note=NR30.86, Exact (0), [SBW25 April 05],Plate=P01,  
 Coordinates=P4, Trace=q416, [UWGC]  
 FT /colour=7  
 FT misc\_feature complement(329354..329355)  
 FT /label=NR12.19  
 FT /note=NR12.19, Estimate (17), [SBW25 April 05],Plate=P01,  
 Coordinates=C14, Trace=q250, [UWGC]  
 FT /colour=7  
 FT misc\_feature complement(329354..329355)  
 FT /label=NR30.07  
 FT /note=NR30.07, Exact (0), [SBW25 April 05],Plate=P01,  
 Coordinates=B14, Trace=q449, [UWGC]  
 FT /colour=7  
 FT misc\_feature 329363..329362  
 FT /label=NR30.85  
 FT /note=NR30.85, Exact (0), [SBW25 April 05],Plate=P01,  
 Coordinates=P2, Trace=q408, [UWGC]  
 FT /colour=7  
 FT misc\_feature complement(329364..329365)  
 FT /label=NR30.42  
 FT /note=NR30.42, Exact (0), [SBW25 April 05],Plate=P01,  
 Coordinates=H12, Trace=q444, [UWGC]  
 FT /colour=7  
 FT misc\_feature complement(329369..329370)  
 FT /label=NR30.41  
 FT /note=NR30.41, Estimate (2), [SBW25 April 05],Plate=P01,  
 Coordinates=H10, Trace=q436, [UWGC]  
 FT /colour=7  
 FT misc\_feature 329377..329376  
 FT /label=NR30.61  
 FT /note=NR30.61, Exact (0), [SBW25 April 05],Plate=P01,  
 Coordinates=L2, Trace=q406, [UWGC]  
 FT /colour=7  
 FT misc\_feature 329382..329381  
 FT /label=NR30.06  
 FT /note=NR30.06, Exact (0), [SBW25 April 05],Plate=P01,  
 Coordinates=B12, Trace=q441, [UWGC]  
 FT /colour=7  
 FT misc\_feature complement(329387..329388)  
 FT /label=NR30.56

FT /note=NR30.56, Exact (0), [SBW25 April 05],Plate=P01,  
Coordinates=J16, Trace=q461, [UWGC]  
FT /colour=7  
FT misc\_feature complement(329393..329394)  
FT /label=NR30.M5.02  
FT /note=NR30.M5.02, Exact (0), [SBW25 April 05],Plate=PM5.1,  
Coordinates=F6, Trace=C492, [Oxford]  
FT /colour=10  
FT misc\_feature complement(329421..329422)  
FT /label=NR09.34  
FT /note=NR09.34, Exact (0), [SBW25 April 05],Plate=P07,  
Coordinates=L05, Trace=q322, [UWGC]  
FT /colour=7  
FT misc\_feature complement(329421..329422)  
FT /label=NR30.68  
FT /note=NR30.68, Exact (0), [SBW25 April 05],Plate=P01,  
Coordinates=L16, Trace=q462, [UWGC]  
FT /colour=7  
FT misc\_feature complement(329426..329427)  
FT /label=NR30.08  
FT /note=NR30.08, Exact (0), [SBW25 April 05],Plate=P01,  
Coordinates=B16, Trace=q457, [UWGC]  
FT /colour=7  
FT misc\_feature complement(329431..329432)  
FT /label=NR09.36  
FT /note=NR09.36, Estimate (136), [SBW25 April 05],Plate=P07,  
Coordinates=N05, Trace=q323, [UWGC]  
FT /colour=7  
FT misc\_feature 329441..329440  
FT /label=NR30.55  
FT /note=NR30.55, Estimate (23), [SBW25 April 05],Plate=P01,  
Coordinates=J14, Trace=q453, [UWGC]  
FT /colour=7  
FT misc\_feature 329484..329483  
FT /label=NR30.23  
FT /note=NR30.23, Estimate (2), [SBW25 April 05],Plate=P01,  
Coordinates=D22, Trace=q482, [UWGC]  
FT /colour=7  
FT misc\_feature 329484..329483  
FT /label=NR30.25  
FT /note=NR30.25, Exact (0), [SBW25 April 05],Plate=P01,  
Coordinates=F2, Trace=q403, [UWGC]  
FT /colour=7  
FT misc\_feature 329484..329483  
FT /label=NR30.29  
FT /note=NR30.29, Estimate (2), [SBW25 April 05],Plate=P01,  
Coordinates=F10, Trace=q435, [UWGC]  
FT /colour=7  
FT misc\_feature 329484..329483  
FT /label=NR30.62  
FT /note=NR30.62, Exact (0), [SBW25 April 05],Plate=P01,  
Coordinates=L4, Trace=q414, [UWGC]  
FT /colour=7  
FT misc\_feature complement(329495..329496)  
FT /label=NR30.10  
FT /note=NR30.10, Estimate (1), [SBW25 April 05],Plate=P01,  
Coordinates=B20, Trace=q473, [UWGC]

FT /colour=7  
FT misc\_feature complement(329520..329521)  
FT /label=NR30.93  
FT /note=NR30.93, Estimate (25), [SBW25 April 05],Plate=P01,  
Coordinates=P18, Trace=q472, [UWGC]  
FT /colour=7  
FT misc\_feature complement(329534..329535)  
FT /label=NR30.16  
FT /note=NR30.16, Exact (0), [SBW25 April 05],Plate=P01,  
Coordinates=D8, Trace=q426, [UWGC]  
FT /colour=7  
FT misc\_feature 329621..329620  
FT /label=NR30.96  
FT /note=NR30.96, Estimate (35), [SBW25 April 05],Plate=P01,  
Coordinates=P24, Trace=q496, [UWGC]  
FT /colour=7  
FT misc\_feature 329625..329624  
FT /label=NR30.12  
FT /note=NR30.12, Estimate (35), [SBW25 April 05],Plate=P01,  
Coordinates=B24, Trace=q489, [UWGC]  
FT /colour=7  
FT misc\_feature 329656..329655  
FT /label=NR30.05  
FT /note=NR30.05, Exact (0), [SBW25 April 05],Plate=P01,  
Coordinates=B10, Trace=q433, [UWGC]  
FT /colour=7  
FT misc\_feature 329656..329655  
FT /label=NR30.24  
FT /note=NR30.24, Exact (0), [SBW25 April 05],Plate=P01,  
Coordinates=D24, Trace=q490, [UWGC]  
FT /colour=7  
FT misc\_feature 329656..329655  
FT /label=NR30.81  
FT /note=NR30.81, Exact (0), [SBW25 April 05],Plate=P01,  
Coordinates=N18, Trace=q471, [UWGC]  
FT /colour=7  
FT misc\_feature 329657..329656  
FT /label=NR30.43  
FT /note=NR30.43, Estimate (0), [SBW25 April 05],Plate=P01,  
Coordinates=H14, Trace=q452, [UWGC]  
FT /colour=7  
FT misc\_feature complement(329691..329692)  
FT /label=NR30.18  
FT /note=NR30.18, Estimate (20), [SBW25 April 05],Plate=P01,  
Coordinates=D12, Trace=q442, [UWGC]  
FT /colour=7  
FT misc\_feature 329695..329694  
FT /label=NR30.95  
FT /note=NR30.95, Estimate (34), [SBW25 April 05],Plate=P01,  
Coordinates=P22, Trace=q488, [UWGC]  
FT /colour=7  
FT misc\_feature 329704..329703  
FT /label=NR30.34  
FT /note=NR30.34, Estimate (38), [SBW25 April 05],Plate=P01,  
Coordinates=F20, Trace=q475, [UWGC]  
FT /colour=7  
FT misc\_feature 329715..329714

FT /label=NR30.20  
FT /note=NR30.20, Exact (0), [SBW25 April 05],Plate=P01,  
Coordinates=D16, Trace=q458, [UWGC]  
FT /colour=7  
FT misc\_feature 329722..329721  
FT /label=NR30.79  
FT /note=NR30.79, Exact (0), [SBW25 April 05],Plate=P01,  
Coordinates=N14, Trace=q455, [UWGC]  
FT /colour=7  
FT misc\_feature complement(329726..329727)  
FT /label=NR30.89  
FT /note=NR30.89, Exact (0), [SBW25 April 05],Plate=P01,  
Coordinates=P10, Trace=q440, [UWGC]  
FT /colour=7  
FT misc\_feature 329727..329726  
FT /label=NR30.74  
FT /note=NR30.74, Exact (0), [SBW25 April 05],Plate=P01,  
Coordinates=N4, Trace=q415, [UWGC]  
FT /colour=7  
FT misc\_feature complement(329728..329729)  
FT /label=NR30.32  
FT /note=NR30.32, Exact (0), [SBW25 April 05],Plate=P01,  
Coordinates=F16, Trace=q459, [UWGC]  
FT /colour=7  
FT misc\_feature complement(329738..329739)  
FT /label=NR30.44  
FT /note=NR30.44, Exact (0), [SBW25 April 05],Plate=P01,  
Coordinates=H16, Trace=q460, [UWGC]  
FT /colour=7  
FT misc\_feature 329745..329744  
FT /label=NR30.69  
FT /note=NR30.69, Estimate (28), [SBW25 April 05],Plate=P01,  
Coordinates=L18, Trace=q470, [UWGC]  
FT /colour=7  
FT misc\_feature complement(329768..329769)  
FT /label=NR30.90  
FT /note=NR30.90, Estimate (24), [SBW25 April 05],Plate=P01,  
Coordinates=P12, Trace=q448, [UWGC]  
FT /colour=7  
FT misc\_feature complement(329779..329780)  
FT /label=NR30.40  
FT /note=NR30.40, Exact (0), [SBW25 April 05],Plate=P01,  
Coordinates=H8, Trace=q428, [UWGC]  
FT /colour=7  
FT misc\_feature complement(329779..329780)  
FT /label=NR30.51  
FT /note=NR30.51, Exact (0), [SBW25 April 05],Plate=P01,  
Coordinates=J6, Trace=q421, [UWGC]  
FT /colour=7  
FT misc\_feature 329787..329786  
FT /label=NR30.33  
FT /note=NR30.33, Exact (0), [SBW25 April 05],Plate=P01,  
Coordinates=F18, Trace=q467, [UWGC]  
FT /colour=7  
FT misc\_feature 329788..329787  
FT /label=NR30.31

FT /note=NR30.31, Exact (0), [SBW25 April 05],Plate=P01,  
Coordinates=F14, Trace=q451, [UWGC]  
FT /colour=7  
FT misc\_feature complement(329803..329804)  
FT /label=NR30.63  
FT /note=NR30.63, Estimate (509), [SBW25 April 05],Plate=P01,  
Coordinates=L6, Trace=q422, [UWGC]  
FT /colour=7  
FT misc\_feature complement(329807..329808)  
FT /label=NR30.58  
FT /note=NR30.58, Estimate (22), [SBW25 April 05],Plate=P01,  
Coordinates=J20, Trace=q477, [UWGC]  
FT /colour=7  
FT misc\_feature complement(329863..329864)  
FT /label=NR30.27  
FT /note=NR30.27, Exact (0), [SBW25 April 05],Plate=P01,  
Coordinates=F6, Trace=q419, [UWGC]  
FT /colour=7  
FT misc\_feature complement(329968..329969)  
FT /label=NR30.88  
FT /note=NR30.88, Exact (0), [SBW25 April 05],Plate=P01,  
Coordinates=P8, Trace=q432, [UWGC]  
FT /colour=7  
FT misc\_feature complement(329978..329979)  
FT /label=NR09.03  
FT /note=NR09.03, Exact (0), [SBW25 April 05],Plate=,  
Coordinates=, Trace=NR9\_03, [Oxford]  
FT /colour=7  
FT misc\_feature 329995..329994  
FT /label=NR30.22  
FT /note=NR30.22, Estimate (35), [SBW25 April 05],Plate=P01,  
Coordinates=D20, Trace=q474, [UWGC]  
FT /colour=7  
FT misc\_feature 330046..330045  
FT /label=NR30.94  
FT /note=NR30.94, Exact (0), [SBW25 April 05],Plate=P01,  
Coordinates=P20, Trace=q480, [UWGC]  
FT /colour=7  
FT misc\_feature 330068..330067  
FT /label=NR30.13  
FT /note=NR30.13, Exact (0), [SBW25 April 05],Plate=P01,  
Coordinates=D2, Trace=q402, [UWGC]  
FT /colour=7  
FT misc\_feature 330068..330067  
FT /label=NR30.65  
FT /note=NR30.65, Exact (0), [SBW25 April 05],Plate=P01,  
Coordinates=L10, Trace=q438, [UWGC]  
FT /colour=7  
FT misc\_feature 330068..330067  
FT /label=NR30.84  
FT /note=NR30.84, Estimate (34), [SBW25 April 05],Plate=P01,  
Coordinates=N24, Trace=q495, [UWGC]  
FT /colour=7  
FT misc\_feature 330076..330075  
FT /label=NR30.02  
FT /note=NR30.02, Estimate (31), UWGC re-mapped on dapB  
deleted genome, [SBW25 April 05],Plate=P01, Coordinates=B4, Trace=q409, [UWGC]



FT /colour=7  
 FT misc\_feature 330079..330078  
 FT /label=NR30.87  
 FT /note=NR30.87, Estimate (25), [SBW25 April 05],Plate=P01,  
 Coordinates=P6, Trace=q424, [UWGC]  
 FT /colour=7  
 FT misc\_feature 330102..330101  
 FT /label=NR30.14  
 FT /note=NR30.14, Exact (0), UWGC re-mapped on dapB deleted  
 genome, [SBW25 April 05],Plate=P01, Coordinates=D4, Trace=q410, [UWGC]  
 FT /colour=7  
 FT misc\_feature 330102..330101  
 FT /label=NR30.17  
 FT /note=NR30.17, Estimate (2), [SBW25 April 05],Plate=P01,  
 Coordinates=D10, Trace=q434, [UWGC]  
 FT /colour=7  
 FT misc\_feature 330102..330101  
 FT /label=NR30.28  
 FT /note=NR30.28, Estimate (6), [SBW25 April 05],Plate=P01,  
 Coordinates=F8, Trace=q427, [UWGC]  
 FT /colour=7  
 FT misc\_feature 330102..330101  
 FT /label=NR30.47  
 FT /note=NR30.47, Estimate (6), [SBW25 April 05],Plate=P01,  
 Coordinates=H22, Trace=q484, [UWGC]  
 FT /colour=7  
 FT misc\_feature 330102..330101  
 FT /label=NR30.59  
 FT /note=NR30.59, Estimate (6), [SBW25 April 05],Plate=P01,  
 Coordinates=J22, Trace=q485, [UWGC]  
 FT /colour=7  
 FT misc\_feature 330102..330101  
 FT /label=NR30.66  
 FT /note=NR30.66, Exact (0), [SBW25 April 05],Plate=P01,  
 Coordinates=L12, Trace=q446, [UWGC]  
 FT /colour=7  
 FT misc\_feature 330102..330101  
 FT /label=NR30.80  
 FT /note=NR30.80, Exact (0), [SBW25 April 05],Plate=P01,  
 Coordinates=N16, Trace=q463, [UWGC]  
 FT /colour=7  
 FT misc\_feature 330102..330101  
 FT /label=NR30.92  
 FT /note=NR30.92, Exact (0), [SBW25 April 05],Plate=P01,  
 Coordinates=P16, Trace=q464, [UWGC]  
 FT /colour=7  
 FT misc\_feature 330103..330102  
 FT /label=NR30.76  
 FT /note=NR30.76, Estimate (1), [SBW25 April 05],Plate=P01,  
 Coordinates=N8, Trace=q431, [UWGC]  
 FT /colour=7  
 FT misc\_feature complement(330134..330135)  
 FT /label=NR30.01  
 FT /note=NR30.01, Exact (0), [SBW25 April 05],Plate=P01,  
 Coordinates=B2, Trace=q401, [UWGC]  
 FT /colour=7  
 FT misc\_feature 330162..330161

FT /label=NR30.35  
 FT /note=NR30.35, Estimate (38), [SBW25 April 05],Plate=P01,  
 Coordinates=F22, Trace=q483, [UWGC]  
 FT /colour=7  
 FT misc\_feature 330164..330163  
 FT /label=NR30.52  
 FT /note=NR30.52, Estimate (2), [SBW25 April 05],Plate=P01,  
 Coordinates=J8, Trace=q429, [UWGC]  
 FT /colour=7  
 FT misc\_feature 330164..330163  
 FT /label=NR30.57  
 FT /note=NR30.57, Estimate (35), [SBW25 April 05],Plate=P01,  
 Coordinates=J18, Trace=q469, [UWGC]  
 FT /colour=7  
 FT misc\_feature 330164..330163  
 FT /label=NR30.78  
 FT /note=NR30.78, Estimate (35), [SBW25 April 05],Plate=P01,  
 Coordinates=N12, Trace=q447, [UWGC]  
 FT /colour=7  
 FT misc\_feature complement(330165..330166)  
 FT /label=NR30.11  
 FT /note=NR30.11, Exact (0), [SBW25 April 05],Plate=P01,  
 Coordinates=B22, Trace=q481, [UWGC]  
 FT /colour=7  
 FT misc\_feature 330167..330166  
 FT /label=NR30.21  
 FT /note=NR30.21, Estimate (33), [SBW25 April 05],Plate=P01,  
 Coordinates=D18, Trace=q466, [UWGC]  
 FT /colour=7  
 FT misc\_feature 330203..330202  
 FT /label=NR30.15  
 FT /note=NR30.15, Estimate (31), [SBW25 April 05],Plate=P01,  
 Coordinates=D6, Trace=q418, [UWGC]  
 FT /colour=7  
 FT misc\_feature complement(330244..330245)  
 FT /label=NR09.22  
 FT /note=NR09.22, Exact (0), [SBW25 April 05],Plate=P07,  
 Coordinates=P04, Trace=q416, [UWGC]  
 FT /colour=7  
 FT misc\_feature complement(330265..330266)  
 FT /label=NR09.24  
 FT /note=NR09.24, Estimate (44), [SBW25 April 05],Plate=P07,  
 Coordinates=B05, Trace=q317, [UWGC]  
 FT /colour=7  
 FT misc\_feature complement(330279..330280)  
 FT /label=NR09.P08  
 FT /note=NR09.P08, Exact (0), [SBW25 April 05],Plate=P06,  
 Coordinates=K3, Trace=NR9\_P08, [Oxford]  
 FT /colour=7  
 FT misc\_feature complement(330314..330315)  
 FT /label=NR09.71  
 FT /note=NR09.71, Estimate (48), [SBW25 April 05],Plate=P07,  
 Coordinates=A08, Trace=q225, [UWGC]  
 FT /colour=7  
 FT misc\_feature 330376..330375  
 FT /label=NR09.29

FT /note=NR09.29, Estimate (43), [SBW25 April 05],Plate=P07,  
Coordinates=G05, Trace=q120, [UWGC]  
FT /colour=7  
FT misc\_feature 330403..330404  
FT /label=NR30.48  
FT /note=NR30.48, Exact (manual correction), [SBW25 April  
05],Plate=P01, Coordinates=H24, Trace=q492, [UWGC]  
FT /colour=7  
FT misc\_feature 330450..330449  
FT /label=NR09.02  
FT /note=NR09.02, Exact (0), [SBW25 April 05],Plate=,  
Coordinates=, Trace=NR9\_02, [Oxford]  
FT /colour=7  
FT misc\_feature 330455..330454  
FT /label=NR09.15  
FT /note=NR09.15, Exact (0), [SBW25 April 05],Plate=P07,  
Coordinates=I04, Trace=q213, [UWGC]  
FT /colour=7  
FT misc\_feature complement(330509..330510)  
FT /label=NR09.P07  
FT /note=NR09.P07, Exact (0), [SBW25 April 05],Plate=P06,  
Coordinates=K1, Trace=NR9\_P07, [Oxford]  
FT /colour=7  
FT misc\_feature complement(330679..330680)  
FT /label=NR09.64  
FT /note=NR09.64, Estimate (0), [SBW25 April 05],Plate=P07,  
Coordinates=J07, Trace=q329, [UWGC]  
FT /colour=7  
FT misc\_feature complement(330679..330680)  
FT /label=NR09.67  
FT /note=NR09.67, Estimate (0), [SBW25 April 05],Plate=P07,  
Coordinates=M07, Trace=q131, [UWGC]  
FT /colour=7  
FT misc\_feature complement(331381..331382)  
FT /label=NR09.65  
FT /note=NR09.65, Estimate (135), [SBW25 April 05],Plate=P07,  
Coordinates=K07, Trace=q130, [UWGC]  
FT /colour=7  
FT misc\_feature 331868..331867  
FT /label=NR09.47  
FT /note=NR09.47, Estimate (11), [SBW25 April 05],Plate=P07,  
Coordinates=I06, Trace=q221, [UWGC]  
FT /colour=7  
FT misc\_feature complement(332049..332050)  
FT /label=NR09.57  
FT /note=NR09.57, Estimate (77), [SBW25 April 05],Plate=P07,  
Coordinates=C07, Trace=q126, [UWGC]  
FT /colour=7  
FT misc\_feature 335588..335589  
FT /label=NR09.91  
FT /note=NR09.91, Estimate (35), [SBW25 April 05],Plate=P07,  
Coordinates=E09, Trace=q135, [UWGC]  
FT /colour=7  
FT misc\_feature 335590..335589  
FT /label=NR09.33  
FT /note=NR09.33, Exact (0), [SBW25 April 05],Plate=P07,  
Coordinates=K05, Trace=q122, [UWGC]

FT /colour=7  
 FT misc\_feature 335590..335589  
 FT /label=NR09.95  
 FT /note=NR09.95, Exact (0), [SBW25 April 05],Plate=P07,  
 Coordinates=I09, Trace=q137, [UWGC]  
 FT /colour=7  
 FT misc\_feature 335611..335612  
 FT /label=NR09.23  
 FT /note=NR09.23, Exact (manual correction), [SBW25 April  
 05],Plate=P07, Coordinates=A05, Trace=q117, [UWGC]  
 FT /colour=7  
 FT misc\_feature 335611..335612  
 FT /label=NR09.50  
 FT /note=NR09.50, Exact (manual correction), [SBW25 April  
 05],Plate=P07, Coordinates=L06, Trace=q422, [UWGC]  
 FT /colour=7  
 FT misc\_feature complement(335638..335639)  
 FT /label=NR09.79  
 FT /note=NR09.79, Estimate (1), [SBW25 April 05],Plate=P07,  
 Coordinates=I08, Trace=q229, [UWGC]  
 FT /colour=7  
 FT misc\_feature complement(335688..335689)  
 FT /label=NR09.100  
 FT /note=NR09.100, Estimate (0), [SBW25 April 05],Plate=P07,  
 Coordinates=N09, Trace=q339, [UWGC]  
 FT /colour=7  
 FT misc\_feature complement(335688..335689)  
 FT /label=NR09.77  
 FT /note=NR09.77, Estimate (1), [SBW25 April 05],Plate=P07,  
 Coordinates=G08, Trace=q228, [UWGC]  
 FT /colour=7  
 FT misc\_feature complement(335688..335689)  
 FT /label=NR09.98  
 FT /note=NR09.98, Estimate (0), [SBW25 April 05],Plate=P07,  
 Coordinates=L09, Trace=q338, [UWGC]  
 FT /colour=7  
 FT misc\_feature complement(335689..335690)  
 FT /label=NR09.70  
 FT /note=NR09.70, Estimate (6), [SBW25 April 05],Plate=P07,  
 Coordinates=P07, Trace=q332, [UWGC]  
 FT /colour=7  
 FT misc\_feature complement(335690..335691)  
 FT /label=NR09.88  
 FT /note=NR09.88, Estimate (0), [SBW25 April 05],Plate=P07,  
 Coordinates=B09, Trace=q333, [UWGC]  
 FT /colour=7  
 FT misc\_feature 335762..335761  
 FT /label=NR09.38  
 FT /note=NR09.38, Estimate (33), [SBW25 April 05],Plate=P07,  
 Coordinates=P05, Trace=q324, [UWGC]  
 FT /colour=7  
 FT misc\_feature 335772..335771  
 FT /label=NR09.87  
 FT /note=NR09.87, Estimate (98), [SBW25 April 05],Plate=P07,  
 Coordinates=A09, Trace=q133, [UWGC]  
 FT /colour=7  
 FT misc\_feature 335805..335804

FT /label=NR09.39  
 FT /note=NR09.39, Exact (0), [SBW25 April 05],Plate=P07,  
 Coordinates=A06, Trace=q217, [UWGC]  
 FT /colour=7  
 FT misc\_feature 335805..335804  
 FT /label=NR09.52  
 FT /note=NR09.52, Exact (0), [SBW25 April 05],Plate=P07,  
 Coordinates=N06, Trace=q423, [UWGC]  
 FT /colour=7  
 FT misc\_feature 335805..335804  
 FT /label=NR09.86  
 FT /note=NR09.86, Estimate (9), [SBW25 April 05],Plate=P07,  
 Coordinates=P08, Trace=q432, [UWGC]  
 FT /colour=7  
 FT misc\_feature 335805..335804  
 FT /label=NR09.96  
 FT /note=NR09.96, Estimate (9), [SBW25 April 05],Plate=P07,  
 Coordinates=J09, Trace=q337, [UWGC]  
 FT /colour=7  
 FT misc\_feature 335806..335805  
 FT /label=NR09.P02  
 FT /note=NR09.P02, Exact (manual correction), [SBW25 April  
 05],Plate=P06, Coordinates=I3, Trace=q113, [UWGC]  
 FT /colour=7  
 FT misc\_feature 335813..335812  
 FT /label=NR09.69  
 FT /note=NR09.69, Estimate (18), [SBW25 April 05],Plate=P07,  
 Coordinates=O07, Trace=q132, [UWGC]  
 FT /colour=7  
 FT misc\_feature 335838..335837  
 FT /label=NR09.P10  
 FT /note=NR09.P10, Exact (0), [SBW25 April 05],Plate=P06,  
 Coordinates=K7, Trace=NR9\_P10, [Oxford]  
 FT /colour=7  
 FT misc\_feature 335850..335849  
 FT /label=NR09.101  
 FT /note=NR09.101, Estimate (8), [SBW25 April 05],Plate=P07,  
 Coordinates=O09, Trace=q140, [UWGC]  
 FT /colour=7  
 FT misc\_feature complement(335893..335894)  
 FT /label=NR09.93  
 FT /note=NR09.93, Estimate (35), [SBW25 April 05],Plate=P07,  
 Coordinates=G09, Trace=q136, [UWGC]  
 FT /colour=7  
 FT misc\_feature complement(335894..335895)  
 FT /label=NR09.06  
 FT /note=NR09.06, Exact (probable), [SBW25 April 05],Plate=,  
 Coordinates=, Trace=NR9\_06, [Oxford]  
 FT /colour=7  
 FT misc\_feature complement(335905..335906)  
 FT /label=NR09.09  
 FT /note=NR09.09, Exact (0), [SBW25 April 05],Plate=,  
 Coordinates=, Trace=NR9\_09, [Oxford]  
 FT /colour=7  
 FT misc\_feature 335922..335921  
 FT /label=NR09.42

FT /note=NR09.42, Estimate (20), [SBW25 April 05],Plate=P07,  
 Coordinates=D06, Trace=q418, [UWGC]  
 FT /colour=7  
 FT misc\_feature complement(335950..335951)  
 FT /label=NR09.14  
 FT /note=NR09.14, Exact (manual correction), [SBW25 April  
 05],Plate=P07, Coordinates=H04, Trace=q412, [UWGC]  
 FT /colour=7  
 FT misc\_feature complement(335950..335951)  
 FT /label=NR09.90  
 FT /note=NR09.90, Exact (manual correction), [SBW25 April  
 05],Plate=P07, Coordinates=D09, Trace=q334, [UWGC]  
 FT /colour=7  
 FT misc\_feature complement(335951..335952)  
 FT /label=NR09.01  
 FT /note=NR09.01, Exact (0), [SBW25 April 05],Plate=,  
 Coordinates=, Trace=NR9\_01, [Oxford]  
 FT /colour=7  
 FT misc\_feature complement(335951..335952)  
 FT /label=NR09.P01  
 FT /note=NR09.P01, Exact (manual correction), [SBW25 April  
 05],Plate=P06, Coordinates=I1, Trace=q105, [UWGC]  
 FT /colour=7  
 FT misc\_feature 346695..346694  
 FT /label=NR12.39  
 FT /note=NR12.39, Exact (0), [SBW25 April 05],Plate=P01,  
 Coordinates=G6, Trace=q220, [UWGC]  
 FT /colour=7  
 FT misc\_feature 397759..397758  
 FT /label=NR54.104  
 FT /note=NR54.104, Estimate (107), [SBW25 April  
 05],Plate=P07, Coordinates=E23, Trace=q191, [UWGC]  
 FT /colour=7  
 FT misc\_feature complement(460368..460369)  
 FT /label=NR12.P09  
 FT /note=NR12.P09, Exact (0), [SBW25 April 05],Plate=P06,  
 Coordinates=O5, Trace=q124, [UWGC]  
 FT /colour=7  
 FT misc\_feature 494447..494446  
 FT /label=NR55.M5.17  
 FT /note=NR55.M5.17, Exact (0), [SBW25 April 05],Plate=PM5.2,  
 Coordinates=H4, Trace=C575, [Oxford]  
 FT /colour=10  
 FT misc\_feature 513668..513667  
 FT /label=NR04.106  
 FT /note=NR04.106, Exact (0), [SBW25 April 05],Plate=P07,  
 Coordinates=J01, Trace=q305, [UWGC]  
 FT /colour=7  
 FT misc\_feature 562159..562158  
 FT /label=NR54.77  
 FT /note=NR54.77, Exact (manual correction), [SBW25 April  
 05],Plate=P05, Coordinates=M9, Trace=q139, [UWGC]  
 FT /colour=7  
 FT misc\_feature complement(575500..575501)  
 FT /label=NR54.97  
 FT /note=NR54.97, Estimate (265), [SBW25 April 05],Plate=P07,  
 Coordinates=N22, Trace=q487, [UWGC]

FT /colour=7  
 FT misc\_feature complement(612201..612202)  
 FT /label=NR12.M5.07  
 FT /note=NR12.M5.07, Exact (0), [SBW25 April 05],Plate=PM5.1,  
 Coordinates=D10, Trace=C522, [Oxford]  
 FT /colour=10  
 FT misc\_feature complement(625096..625097)  
 FT /label=NR32.37  
 FT /note=NR32.37, Estimate (678), [SBW25 April 05],Plate=P02,  
 Coordinates=G2, Trace=q204, [UWGC]  
 FT /colour=7  
 FT misc\_feature complement(712219..712220)  
 FT /label=NR12.09  
 FT /note=NR12.09,MCS hit  
 =GATCTGCAGGTCGAGCGCT^TAATTAAGTAGTCGAGTTGGGTATG, [SBW25 April 05],Plate=P01,  
 Coordinates=A18, Trace=q265, [UWGC]  
 FT /colour=7  
 FT misc\_feature complement(712219..712220)  
 FT /label=NR12.85  
 FT /note=NR12.85,MCS hit =  
 GATCTGCAGGTCGAGCGCTTAATT^AACTAGTCGAGTTGGGTATG, [SBW25 April 05],Plate=P01,  
 Coordinates=O2, Trace=q208, [UWGC]  
 FT /colour=7  
 FT misc\_feature complement(712219..712220)  
 FT /label=NR12.93  
 FT /note=NR12.93,MCS hit =  
 GATCTGCAGGTCGAGCGCT^TAATTAAGTAGTCGAGTTGGGTATG, [SBW25 April 05],Plate=P01,  
 Coordinates=O18, Trace=q272, [UWGC]  
 FT /colour=7  
 FT misc\_feature 712220..712219  
 FT /label=NR12.16  
 FT /note=NR12.16,MCS hit =  
 GATCTGCAG^GTCGAGCGCTTAATTAAGTAGTCGAGTTGGGTATG, [SBW25 April 05],Plate=P01,  
 Coordinates=C8, Trace=q226, [UWGC]  
 FT /colour=7  
 FT misc\_feature complement(712238..712239)  
 FT /label=NR12.M5.15  
 FT /note=NR12.M5.15, Exact (0), [SBW25 April 05],Plate=PM5.1,  
 Coordinates=E6, Trace=C491, [Oxford]  
 FT /colour=10  
 FT misc\_feature 712241..712240  
 FT /label=NR12.90  
 FT /note=NR12.90, Exact (0), [SBW25 April 05],Plate=P01,  
 Coordinates=O12, Trace=q248, [UWGC]  
 FT /colour=7  
 FT misc\_feature complement(712242..712243)  
 FT /label=NR12.94  
 FT /note=NR12.94, Exact (manual correction), UWGC re-mapped on  
 dapB deleted genome, [SBW25 April 05],Plate=P01, Coordinates=O20, Trace=q280,  
 [UWGC]  
 FT /colour=7  
 FT misc\_feature 712256..712257  
 FT /label=NR12.75  
 FT /note=NR12.75, Exact (manual correction), UWGC re-mapped on  
 dapB deleted genome, [SBW25 April 05],Plate=P01, Coordinates=M6, Trace=q223,  
 [UWGC]  
 FT /colour=7

FT misc\_feature 712377..712376  
FT /label=NR12.88  
FT /note=NR12.88, Exact (0), [SBW25 April 05],Plate=P01,  
Coordinates=O8, Trace=q232, [UWGC]  
FT /colour=7  
FT misc\_feature 712378..712377  
FT /label=NR12.18  
FT /note=NR12.18, Estimate (4), [SBW25 April 05],Plate=P01,  
Coordinates=C12, Trace=q242, [UWGC]  
FT /colour=7  
FT misc\_feature 712381..712380  
FT /label=NR12.12  
FT /note=NR12.12, Estimate (26), [SBW25 April 05],Plate=P01,  
Coordinates=A24, Trace=q289, [UWGC]  
FT /colour=7  
FT misc\_feature complement(712388..712389)  
FT /label=NR12.32  
FT /note=NR12.32, Exact (0), [SBW25 April 05],Plate=P01,  
Coordinates=E16, Trace=q259, [UWGC]  
FT /colour=7  
FT misc\_feature 712407..712406  
FT /label=NR12.21  
FT /note=NR12.21, Exact (0), [SBW25 April 05],Plate=P01,  
Coordinates=C18, Trace=q266, [UWGC]  
FT /colour=7  
FT misc\_feature 712407..712406  
FT /label=NR12.89  
FT /note=NR12.89, Exact (0), [SBW25 April 05],Plate=P01,  
Coordinates=O10, Trace=q240, [UWGC]  
FT /colour=7  
FT misc\_feature 712408..712407  
FT /label=NR12.14  
FT /note=NR12.14, Estimate (51), [SBW25 April 05],Plate=P01,  
Coordinates=C4, Trace=q210, [UWGC]  
FT /colour=7  
FT misc\_feature complement(712418..712419)  
FT /label=NR12.25  
FT /note=NR12.25, Exact (0), [SBW25 April 05],Plate=P01,  
Coordinates=E2, Trace=q203, [UWGC]  
FT /colour=7  
FT misc\_feature 712468..712467  
FT /label=NR12.06  
FT /note=NR12.06, Estimate (23), [SBW25 April 05],Plate=P01,  
Coordinates=A12, Trace=q241, [UWGC]  
FT /colour=7  
FT misc\_feature 712477..712476  
FT /label=NR12.29  
FT /note=NR12.29, Estimate (31), [SBW25 April 05],Plate=P01,  
Coordinates=E10, Trace=q235, [UWGC]  
FT /colour=7  
FT misc\_feature 712491..712490  
FT /label=NR12.17  
FT /note=NR12.17, Estimate (19), [SBW25 April 05],Plate=P01,  
Coordinates=C10, Trace=q234, [UWGC]  
FT /colour=7  
FT misc\_feature 712491..712490  
FT /label=NR12.27



FT /note=NR12.27, Exact (0), [SBW25 April 05],Plate=P01,  
Coordinates=E6, Trace=q219, [UWGC]  
FT /colour=7  
FT misc\_feature 712491..712490  
FT /label=NR12.33  
FT /note=NR12.33, Exact (0), [SBW25 April 05],Plate=P01,  
Coordinates=E18, Trace=q267, [UWGC]  
FT /colour=7  
FT misc\_feature 712491..712490  
FT /label=NR12.37  
FT /note=NR12.37, Exact (0), [SBW25 April 05],Plate=P01,  
Coordinates=G2, Trace=q204, [UWGC]  
FT /colour=7  
FT misc\_feature 712491..712490  
FT /label=NR12.52  
FT /note=NR12.52, Exact (0), [SBW25 April 05],Plate=P01,  
Coordinates=I8, Trace=q229, [UWGC]  
FT /colour=7  
FT misc\_feature 712491..712490  
FT /label=NR12.57  
FT /note=NR12.57, Exact (0), [SBW25 April 05],Plate=P01,  
Coordinates=I18, Trace=q269, [UWGC]  
FT /colour=7  
FT misc\_feature 712493..712492  
FT /label=NR12.65  
FT /note=NR12.65, Estimate (6), [SBW25 April 05],Plate=P01,  
Coordinates=K10, Trace=q238, [UWGC]  
FT /colour=7  
FT misc\_feature 712503..712502  
FT /label=NR12.08  
FT /note=NR12.08, Exact (0), [SBW25 April 05],Plate=P01,  
Coordinates=A16, Trace=q257, [UWGC]  
FT /colour=7  
FT misc\_feature 712508..712507  
FT /label=NR12.13  
FT /note=NR12.13, Exact (0), [SBW25 April 05],Plate=P01,  
Coordinates=C2, Trace=q202, [UWGC]  
FT /colour=7  
FT misc\_feature 712508..712507  
FT /label=NR12.60  
FT /note=NR12.60, Exact (0), [SBW25 April 05],Plate=P01,  
Coordinates=I24, Trace=q293, [UWGC]  
FT /colour=7  
FT misc\_feature 712519..712518  
FT /label=NR12.03  
FT /note=NR12.03, Exact (0), [SBW25 April 05],Plate=P01,  
Coordinates=A6, Trace=q217, [UWGC]  
FT /colour=7  
FT misc\_feature 712519..712518  
FT /label=NR12.45  
FT /note=NR12.45, Exact (0), [SBW25 April 05],Plate=P01,  
Coordinates=G18, Trace=q268, [UWGC]  
FT /colour=7  
FT misc\_feature complement (712530..712531)  
FT /label=NR12.P07  
FT /note=NR12.P07, Exact (0), [SBW25 April 05],Plate=P06,  
Coordinates=O1, Trace=q108, [UWGC]

FT /colour=7  
FT misc\_feature 712549..712548  
FT /label=NR12.02  
FT /note=NR12.02, Exact (0), [SBW25 April 05],Plate=P01,  
Coordinates=A4, Trace=q209, [UWGC]  
FT /colour=7  
FT misc\_feature 712556..712555  
FT /label=NR12.28  
FT /note=NR12.28, Estimate (41), [SBW25 April 05],Plate=P01,  
Coordinates=E8, Trace=q227, [UWGC]  
FT /colour=7  
FT misc\_feature complement(712561..712562)  
FT /label=NR12.63  
FT /note=NR12.63, Exact (0), [SBW25 April 05],Plate=P01,  
Coordinates=K6, Trace=q222, [UWGC]  
FT /colour=7  
FT misc\_feature 712581..712580  
FT /label=NR12.P04  
FT /note=NR12.P04, Estimate (26), [SBW25 April 05],Plate=P06,  
Coordinates=M7, Trace=q131, [UWGC]  
FT /colour=7  
FT misc\_feature complement(712581..712582)  
FT /label=NR12.49  
FT /note=NR12.49, Exact (0), [SBW25 April 05],Plate=P01,  
Coordinates=I2, Trace=q205, [UWGC]  
FT /colour=7  
FT misc\_feature 712583..712582  
FT /label=NR12.P05  
FT /note=NR12.P05, Estimate (24), [SBW25 April 05],Plate=P06,  
Coordinates=M9, Trace=q139, [UWGC]  
FT /colour=7  
FT misc\_feature 712591..712590  
FT /label=NR12.61  
FT /note=NR12.61, Exact (0), [SBW25 April 05],Plate=P01,  
Coordinates=K2, Trace=q206, [UWGC]  
FT /colour=7  
FT misc\_feature 712591..712590  
FT /label=NR12.82  
FT /note=NR12.82, Exact (0), [SBW25 April 05],Plate=P01,  
Coordinates=M20, Trace=q279, [UWGC]  
FT /colour=7  
FT misc\_feature 712601..712600  
FT /label=NR12.04  
FT /note=NR12.04, Exact (0), [SBW25 April 05],Plate=P01,  
Coordinates=A8, Trace=q225, [UWGC]  
FT /colour=7  
FT misc\_feature 712601..712600  
FT /label=NR12.41  
FT /note=NR12.41, Exact (0), [SBW25 April 05],Plate=P01,  
Coordinates=G10, Trace=q236, [UWGC]  
FT /colour=7  
FT misc\_feature complement(712602..712603)  
FT /label=NR12.76  
FT /note=NR12.76, Estimate (2), [SBW25 April 05],Plate=P01,  
Coordinates=M8, Trace=q231, [UWGC]  
FT /colour=7  
FT misc\_feature 712608..712607

FT /label=NR12.23  
FT /note=NR12.23, Estimate (0), [SBW25 April 05],Plate=P01,  
Coordinates=C22, Trace=q282, [UWGC]  
FT /colour=7  
FT misc\_feature 712608..712607  
FT /label=NR12.46  
FT /note=NR12.46, Exact (0), [SBW25 April 05],Plate=P01,  
Coordinates=G20, Trace=q276, [UWGC]  
FT /colour=7  
FT misc\_feature 712608..712607  
FT /label=NR12.P02  
FT /note=NR12.P02, Exact (0), [SBW25 April 05],Plate=P06,  
Coordinates=M3, Trace=q115, [UWGC]  
FT /colour=7  
FT misc\_feature complement(712612..712613)  
FT /label=NR12.59  
FT /note=NR12.59, Exact (0), [SBW25 April 05],Plate=P01,  
Coordinates=I22, Trace=q285, [UWGC]  
FT /colour=7  
FT misc\_feature complement(712612..712613)  
FT /label=NR12.74  
FT /note=NR12.74, Exact (0), [SBW25 April 05],Plate=P01,  
Coordinates=M4, Trace=q215, [UWGC]  
FT /colour=7  
FT misc\_feature complement(712619..712620)  
FT /label=NR12.73  
FT /note=NR12.73, Exact (0), [SBW25 April 05],Plate=P01,  
Coordinates=M2, Trace=q207, [UWGC]  
FT /colour=7  
FT misc\_feature complement(712619..712620)  
FT /label=NR12.86  
FT /note=NR12.86, Exact (0), [SBW25 April 05],Plate=P01,  
Coordinates=O4, Trace=q216, [UWGC]  
FT /colour=7  
FT misc\_feature complement(712645..712646)  
FT /label=NR12.54  
FT /note=NR12.54, Estimate (26), [SBW25 April 05],Plate=P01,  
Coordinates=I12, Trace=q245, [UWGC]  
FT /colour=7  
FT misc\_feature 712691..712690  
FT /label=NR12.05  
FT /note=NR12.05, Exact (0), [SBW25 April 05],Plate=P01,  
Coordinates=A10, Trace=q233, [UWGC]  
FT /colour=7  
FT misc\_feature complement(712700..712701)  
FT /label=NR12.51  
FT /note=NR12.51, Exact (0), [SBW25 April 05],Plate=P01,  
Coordinates=I6, Trace=q221, [UWGC]  
FT /colour=7  
FT misc\_feature complement(712771..712772)  
FT /label=NR12.P06  
FT /note=NR12.P06, Exact (0), [SBW25 April 05],Plate=P06,  
Coordinates=M11, Trace=q147, [UWGC]  
FT /colour=7  
FT misc\_feature 712873..712872  
FT /label=NR12.72

FT /note=NR12.72, Exact (manual correction), [SBW25 April 05],Plate=P01, Coordinates=K24, Trace=q294, [UWGC]  
FT /colour=7  
FT misc\_feature 713886..713885  
FT /label=NR12.92  
FT /note=NR12.92, Exact (0), [SBW25 April 05],Plate=P01, Coordinates=O16, Trace=q264, [UWGC]  
FT /colour=7  
FT misc\_feature 713888..713889  
FT /label=NR12.80  
FT /note=NR12.80, Exact (manual correction), [SBW25 April 05],Plate=P01, Coordinates=M16, Trace=q263, [UWGC]  
FT /colour=7  
FT misc\_feature complement(713896..713897)  
FT /label=NR12.15  
FT /note=NR12.15, Exact (manual correction), UWGC re-mapped on dapB deleted genome, [SBW25 April 05],Plate=P01, Coordinates=C6, Trace=q218, [UWGC]  
FT /colour=7  
FT misc\_feature complement(713898..713899)  
FT /label=NR12.44  
FT /note=NR12.44, Exact (0), [SBW25 April 05],Plate=P01, Coordinates=G16, Trace=q260, [UWGC]  
FT /colour=7  
FT misc\_feature 720525..720526  
FT /label=NR46.16  
FT /note=NR46.16, Exact (manual correction), [SBW25 April 05],Plate=P04, Coordinates=C8, Trace=q226, [UWGC]  
FT /colour=7  
FT misc\_feature 720525..720526  
FT /label=NR46.18  
FT /note=NR46.18, Estimate (32), [SBW25 April 05],Plate=P04, Coordinates=C12, Trace=q242, [UWGC]  
FT /colour=7  
FT misc\_feature 720525..720526  
FT /label=NR46.28  
FT /note=NR46.28, Exact (0), [SBW25 April 05],Plate=P04, Coordinates=E8, Trace=q227, [UWGC]  
FT /colour=7  
FT misc\_feature 720525..720526  
FT /label=NR46.42  
FT /note=NR46.42, Exact (0), [SBW25 April 05],Plate=P04, Coordinates=G12, Trace=q244, [UWGC]  
FT /colour=7  
FT misc\_feature 720525..720526  
FT /label=NR46.56  
FT /note=NR46.56, Exact (0), [SBW25 April 05],Plate=P04, Coordinates=I16, Trace=q261, [UWGC]  
FT /colour=7  
FT misc\_feature 720525..720526  
FT /label=NR46.67  
FT /note=NR46.67, Exact (0), [SBW25 April 05],Plate=P04, Coordinates=K14, Trace=q254, [UWGC]  
FT /colour=7  
FT misc\_feature 720525..720526  
FT /label=NR46.84

FT /note=NR46.84, Estimate (0), [SBW25 April 05],Plate=P04,  
 Coordinates=M24, Trace=q295, [UWGC]  
 FT /colour=7  
 FT misc\_feature 720525..720526  
 FT /label=NR46.85  
 FT /note=NR46.85,MCS hit =  
 GATCTGCAG^GTCGAGCGCTTAATTAAGTTCGAGTTGGGTATG, [SBW25 April 05],Plate=P04,  
 Coordinates=O2, Trace=q208, [UWGC]  
 FT /colour=7  
 FT misc\_feature complement(720525..720526)  
 FT /label=NR46.63  
 FT /note=NR46.63,MCS hit =  
 GATCTGCA^GGTCGAGCGCTTAATTAAGTTCGAGTTGGGTATG, [SBW25 April 05],Plate=P04,  
 Coordinates=K6, Trace=q222, [UWGC]  
 FT /colour=7  
 FT misc\_feature complement(720525..720526)  
 FT /label=NR46.83  
 FT /note=NR46.83,MCS hit =  
 GATCTGCAG^GTCGAGCGCTTAATTAAGTTCGAGTTGGGTATG, [SBW25 April 05],Plate=P04,  
 Coordinates=M22, Trace=q287, [UWGC]  
 FT /colour=7  
 FT misc\_feature complement(720525..720526)  
 FT /label=NR46.87  
 FT /note=NR46.87,MCS hit =  
 GATCTGCA^GGTCGAGCGCTTAATTAAGTTCGAGTTGGGTATG, [SBW25 April 05],Plate=P04,  
 Coordinates=O6, Trace=q224, [UWGC]  
 FT /colour=7  
 FT misc\_feature 720531..720530  
 FT /label=NR46.60  
 FT /note=NR46.60, Estimate (34), [SBW25 April 05],Plate=P04,  
 Coordinates=I24, Trace=q293, [UWGC]  
 FT /colour=7  
 FT misc\_feature complement(720534..720535)  
 FT /label=NR46.17  
 FT /note=NR46.17, Exact (manual correction), [SBW25 April  
 05],Plate=P04, Coordinates=C10, Trace=q234, [UWGC]  
 FT /colour=7  
 FT misc\_feature complement(720535..720536)  
 FT /label=NR46.37  
 FT /note=NR46.37, Exact (manual correction), [SBW25 April  
 05],Plate=P04, Coordinates=G2, Trace=q204, [UWGC]  
 FT /colour=7  
 FT misc\_feature complement(720535..720536)  
 FT /label=NR46.62  
 FT /note=NR46.62, Exact (manual correction), [SBW25 April  
 05],Plate=P04, Coordinates=K4, Trace=q214, [UWGC]  
 FT /colour=7  
 FT misc\_feature 720547..720546  
 FT /label=NR46.40  
 FT /note=NR46.40, Exact (0), [SBW25 April 05],Plate=P04,  
 Coordinates=G8, Trace=q228, [UWGC]  
 FT /colour=7  
  
 FT misc\_feature 720547..720546  
 FT /label=NR46.P06  
 FT /note=NR46.P06, Exact (0), [SBW25 April 05],Plate=P05,  
 Coordinates=N12, Trace=q447, [UWGC]

FT /colour=7  
 FT misc\_feature 720551..720550  
 FT /label=NR46.29  
 FT /note=NR46.29, Estimate (27), [SBW25 April 05],Plate=P04,  
 Coordinates=E10, Trace=q235, [UWGC]  
 FT /colour=7  
 FT misc\_feature 720553..720552  
 FT /label=NR46.06  
 FT /note=NR46.06, Estimate (25), [SBW25 April 05],Plate=P04,  
 Coordinates=A12, Trace=q241, [UWGC]  
 FT /colour=7  
 FT misc\_feature 720553..720552  
 FT /label=NR46.27  
 FT /note=NR46.27, Exact (0), [SBW25 April 05],Plate=P04,  
 Coordinates=E6, Trace=q219, [UWGC]  
 FT /colour=7  
 FT misc\_feature complement(720557..720558)  
 FT /label=NR46.30  
 FT /note=NR46.30, Exact (0), UWGC re-mapped on dapB deleted  
 genome, [SBW25 April 05],Plate=P04, Coordinates=E12, Trace=q243, [UWGC]  
 FT /colour=7  
 FT misc\_feature 720562..720561  
 FT /label=NR46.P05  
 FT /note=NR46.P05, Estimate (13), [SBW25 April 05],Plate=P05,  
 Coordinates=N10, Trace=q439, [UWGC]  
 FT /colour=7  
 FT misc\_feature complement(720565..720566)  
 FT /label=NR46.14  
 FT /note=NR46.14, Exact (0), UWGC re-mapped on dapB deleted  
 genome, [SBW25 April 05],Plate=P04, Coordinates=C4, Trace=q210, [UWGC]  
 FT /colour=7  
 FT misc\_feature complement(720578..720579)  
 FT /label=NR46.92  
 FT /note=NR46.92, Estimate (12), UWGC re-mapped on dapB  
 deleted genome, [SBW25 April 05],Plate=P04, Coordinates=O16, Trace=q264, [UWGC]  
 FT /colour=7  
 FT misc\_feature 720579..720578  
 FT /label=NR46.05  
 FT /note=NR46.05, Estimate (9), [SBW25 April 05],Plate=P04,  
 Coordinates=A10, Trace=q233, [UWGC]  
 FT /colour=7  
 FT misc\_feature 720579..720578  
 FT /label=NR46.07  
 FT /note=NR46.07, Exact (0), [SBW25 April 05],Plate=P04,  
 Coordinates=A14, Trace=q249, [UWGC]  
 FT /colour=7  
 FT misc\_feature 720579..720578  
 FT /label=NR46.21  
 FT /note=NR46.21, Exact (0), [SBW25 April 05],Plate=P04,  
 Coordinates=C18, Trace=q266, [UWGC]  
 FT /colour=7  
 FT misc\_feature 720579..720578  
 FT /label=NR46.35  
 FT /note=NR46.35, Estimate (0), [SBW25 April 05],Plate=P04,  
 Coordinates=E22, Trace=q283, [UWGC]  
 FT /colour=7  
 FT misc\_feature 720579..720578

FT /label=NR46.41  
 FT /note=NR46.41, Exact (0), [SBW25 April 05],Plate=P04,  
 Coordinates=G10, Trace=q236, [UWGC]  
 FT /colour=7  
 FT misc\_feature 720579..720578  
 FT /label=NR46.45  
 FT /note=NR46.45, Exact (0), [SBW25 April 05],Plate=P04,  
 Coordinates=G18, Trace=q268, [UWGC]  
 FT /colour=7  
 FT misc\_feature 720579..720578  
 FT /label=NR46.49  
 FT /note=NR46.49, Exact (0), [SBW25 April 05],Plate=P04,  
 Coordinates=I2, Trace=q205, [UWGC]  
 FT /colour=7  
 FT misc\_feature 720579..720578  
 FT /label=NR46.51  
 FT /note=NR46.51, Exact (0), [SBW25 April 05],Plate=P04,  
 Coordinates=I6, Trace=q221, [UWGC]  
 FT /colour=7  
 FT misc\_feature 720579..720578  
 FT /label=NR46.53  
 FT /note=NR46.53, Exact (0), [SBW25 April 05],Plate=P04,  
 Coordinates=I10, Trace=q237, [UWGC]  
 FT /colour=7  
 FT misc\_feature 720579..720578  
 FT /label=NR46.64  
 FT /note=NR46.64, Exact (0), [SBW25 April 05],Plate=P04,  
 Coordinates=K8, Trace=q230, [UWGC]  
 FT /colour=7  
 FT misc\_feature 720579..720578  
 FT /label=NR46.75  
 FT /note=NR46.75, Exact (0), [SBW25 April 05],Plate=P04,  
 Coordinates=M6, Trace=q223, [UWGC]  
 FT /colour=7  
 FT misc\_feature 720580..720579  
 FT /label=NR46.52  
 FT /note=NR46.52, Estimate (0), [SBW25 April 05],Plate=P04,  
 Coordinates=I8, Trace=q229, [UWGC]  
 FT /colour=7  
 FT misc\_feature complement(720580..720581)  
 FT /label=NR46.46  
 FT /note=NR46.46, Exact (0), UWGC re-mapped on dapB deleted  
 genome, [SBW25 April 05],Plate=P04, Coordinates=G20, Trace=q276, [UWGC]  
 FT /colour=7  
 FT misc\_feature complement(720584..720585)  
 FT /label=NR46.43  
 FT /note=NR46.43, Estimate (2), UWGC re-mapped on dapB deleted  
 genome, [SBW25 April 05],Plate=P04, Coordinates=G14, Trace=q252, [UWGC]  
 FT /colour=7  
 FT misc\_feature complement(720589..720590)  
 FT /label=NR46.13  
 FT /note=NR46.13, Estimate (0), UWGC re-mapped on dapB deleted  
 genome, [SBW25 April 05],Plate=P04, Coordinates=C2, Trace=q202, [UWGC]  
 FT /colour=7  
 FT misc\_feature complement(720590..720591)  
 FT /label=NR46.04

FT /note=NR46.04, Exact (0), UWGC re-mapped on dapB deleted  
genome, [SBW25 April 05],Plate=P04, Coordinates=A8, Trace=q225, [UWGC]  
FT /colour=7  
FT misc\_feature complement(720590..720591)  
FT /label=NR46.23  
FT /note=NR46.23, Exact (0), UWGC re-mapped on dapB deleted  
genome, [SBW25 April 05],Plate=P04, Coordinates=C22, Trace=q282, [UWGC]  
FT /colour=7  
FT misc\_feature complement(720590..720591)  
FT /label=NR46.24  
FT /note=NR46.24, Exact (0), UWGC re-mapped on dapB deleted  
genome, [SBW25 April 05],Plate=P04, Coordinates=C24, Trace=q290, [UWGC]  
FT /colour=7  
FT misc\_feature complement(720590..720591)  
FT /label=NR46.33  
FT /note=NR46.33, Exact (0), UWGC re-mapped on dapB deleted  
genome, [SBW25 April 05],Plate=P04, Coordinates=E18, Trace=q267, [UWGC]  
FT /colour=7  
FT misc\_feature complement(720590..720591)  
FT /label=NR46.34  
FT /note=NR46.34, Exact (0), UWGC re-mapped on dapB deleted  
genome, [SBW25 April 05],Plate=P04, Coordinates=E20, Trace=q275, [UWGC]  
FT /colour=7  
FT misc\_feature complement(720590..720591)  
FT /label=NR46.39  
FT /note=NR46.39, Exact (0), UWGC re-mapped on dapB deleted  
genome, [SBW25 April 05],Plate=P04, Coordinates=G6, Trace=q220, [UWGC]  
FT /colour=7  
FT misc\_feature complement(720590..720591)  
FT /label=NR46.48  
FT /note=NR46.48, Exact (0), UWGC re-mapped on dapB deleted  
genome, [SBW25 April 05],Plate=P04, Coordinates=G24, Trace=q292, [UWGC]  
FT /colour=7  
FT misc\_feature complement(720590..720591)  
FT /label=NR46.54  
FT /note=NR46.54, Exact (0), UWGC re-mapped on dapB deleted  
genome, [SBW25 April 05],Plate=P04, Coordinates=I12, Trace=q245, [UWGC]  
FT /colour=7  
FT misc\_feature complement(720590..720591)  
FT /label=NR46.66  
FT /note=NR46.66, Exact (0), UWGC re-mapped on dapB deleted  
genome, [SBW25 April 05],Plate=P04, Coordinates=K12, Trace=q246, [UWGC]  
FT /colour=7  
FT misc\_feature complement(720590..720591)  
FT /label=NR46.70  
FT /note=NR46.70, Exact (0), UWGC re-mapped on dapB deleted  
genome, [SBW25 April 05],Plate=P04, Coordinates=K20, Trace=q278, [UWGC]  
FT /colour=7  
FT misc\_feature complement(720590..720591)  
FT /label=NR46.78  
FT /note=NR46.78, Exact (0), UWGC re-mapped on dapB deleted  
genome, [SBW25 April 05],Plate=P04, Coordinates=M12, Trace=q247, [UWGC]  
FT /colour=7  
FT misc\_feature complement(720590..720591)  
FT /label=NR46.79  
FT /note=NR46.79, Exact (0), UWGC re-mapped on dapB deleted  
genome, [SBW25 April 05],Plate=P04, Coordinates=M14, Trace=q255, [UWGC]



FT /colour=7  
 FT misc\_feature complement(720590..720591)  
 FT /label=NR46.81  
 FT /note=NR46.81, Exact (0), UWGC re-mapped on dapB deleted  
 genome, [SBW25 April 05],Plate=P04, Coordinates=M18, Trace=q271, [UWGC]  
 FT /colour=7  
 FT misc\_feature complement(720590..720591)  
 FT /label=NR46.89  
 FT /note=NR46.89, Exact (0), UWGC re-mapped on dapB deleted  
 genome, [SBW25 April 05],Plate=P04, Coordinates=O10, Trace=q240, [UWGC]  
 FT /colour=7  
 FT misc\_feature complement(720590..720591)  
 FT /label=NR46.91  
 FT /note=NR46.91, Exact (0), UWGC re-mapped on dapB deleted  
 genome, [SBW25 April 05],Plate=P04, Coordinates=O14, Trace=q256, [UWGC]  
 FT /colour=7  
 FT misc\_feature complement(720590..720591)  
 FT /label=NR46.P03  
 FT /note=NR46.P03, Exact (0), UWGC re-mapped on dapB deleted  
 genome, [SBW25 April 05],Plate=P05, Coordinates=N6, Trace=q423, [UWGC]  
 FT /colour=7  
 FT misc\_feature 720591..720590  
 FT /label=NR46.55  
 FT /note=NR46.55, Exact (0), [SBW25 April 05],Plate=P04,  
 Coordinates=I14, Trace=q253, [UWGC]  
 FT /colour=7  
 FT misc\_feature complement(720598..720599)  
 FT /label=NR46.P07  
 FT /note=NR46.P07, Estimate (8), UWGC re-mapped on dapB  
 deleted genome, [SBW25 April 05],Plate=P05, Coordinates=P2, Trace=q408, [UWGC]  
 FT /colour=7  
 FT misc\_feature 720601..720600  
 FT /label=NR46.73  
 FT /note=NR46.73, Estimate (6), [SBW25 April 05],Plate=P04,  
 Coordinates=M2, Trace=q207, [UWGC]  
 FT /colour=7  
 FT misc\_feature 720602..720601  
 FT /label=NR46.57  
 FT /note=NR46.57, Exact (0), [SBW25 April 05],Plate=P04,  
 Coordinates=I18, Trace=q269, [UWGC]  
 FT /colour=7  
 FT misc\_feature complement(720603..720604)  
 FT /label=NR46.20  
 FT /note=NR46.20, Exact (0), UWGC re-mapped on dapB deleted  
 genome, [SBW25 April 05],Plate=P04, Coordinates=C16, Trace=q258, [UWGC]  
 FT /colour=7  
 FT misc\_feature complement(720603..720604)  
 FT /label=NR46.58  
 FT /note=NR46.58, Exact (0), UWGC re-mapped on dapB deleted  
 genome, [SBW25 April 05],Plate=P04, Coordinates=I20, Trace=q277, [UWGC]  
 FT /colour=7  
 FT misc\_feature complement(720603..720604)  
 FT /label=NR46.P09  
 FT /note=NR46.P09, Estimate (13), UWGC re-mapped on dapB  
 deleted genome, [SBW25 April 05],Plate=P05, Coordinates=P6, Trace=q424, [UWGC]  
 FT /colour=7  
 FT misc\_feature complement(720610..720611)

FT /label=NR46.93  
 FT /note=NR46.93, Estimate (20), UWGC re-mapped on dapB  
 deleted genome, [SBW25 April 05],Plate=P04, Coordinates=O18, Trace=q272, [UWGC]  
 FT /colour=7  
 FT misc\_feature 720612..720611  
 FT /label=NR46.38  
 FT /note=NR46.38, Exact (0), [SBW25 April 05],Plate=P04,  
 Coordinates=G4, Trace=q212, [UWGC]  
 FT /colour=7  
 FT misc\_feature complement(720615..720616)  
 FT /label=NR46.31  
 FT /note=NR46.31, Exact (0), [SBW25 April 05],Plate=P04,  
 Coordinates=E14, Trace=q251, [UWGC]  
 FT /colour=7  
 FT misc\_feature complement(720617..720618)  
 FT /label=NR46.59  
 FT /note=NR46.59, Estimate (27), UWGC re-mapped on dapB  
 deleted genome, [SBW25 April 05],Plate=P04, Coordinates=I22, Trace=q285, [UWGC]  
 FT /colour=7  
 FT misc\_feature complement(720617..720618)  
 FT /label=NR46.61  
 FT /note=NR46.61, Estimate (27), UWGC re-mapped on dapB  
 deleted genome, [SBW25 April 05],Plate=P04, Coordinates=K2, Trace=q206, [UWGC]  
 FT /colour=7  
 FT misc\_feature complement(720623..720624)  
 FT /label=NR46.96  
 FT /note=NR46.96, Exact (0), [SBW25 April 05],Plate=P04,  
 Coordinates=O24, Trace=q296, [UWGC]  
 FT /colour=7  
 FT misc\_feature 720626..720625  
 FT /label=NR46.01  
 FT /note=NR46.01, Estimate (33), [SBW25 April 05],Plate=P04,  
 Coordinates=A2, Trace=q201, [UWGC]  
 FT /colour=7  
 FT misc\_feature 720639..720638  
 FT /label=NR46.15  
 FT /note=NR46.15, Estimate (32), [SBW25 April 05],Plate=P04,  
 Coordinates=C6, Trace=q218, [UWGC]  
 FT /colour=7  
 FT misc\_feature complement(720642..720643)  
 FT /label=NR46.65  
 FT /note=NR46.65, Estimate (28), UWGC re-mapped on dapB  
 deleted genome, [SBW25 April 05],Plate=P04, Coordinates=K10, Trace=q238, [UWGC]  
 FT /colour=7  
 FT misc\_feature complement(720654..720655)  
 FT /label=NR46.80  
 FT /note=NR46.80, Estimate (17), UWGC re-mapped on dapB  
 deleted genome, [SBW25 April 05],Plate=P04, Coordinates=M16, Trace=q263, [UWGC]  
 FT /colour=7  
 FT misc\_feature complement(720655..720656)  
 FT /label=NR46.72  
 FT /note=NR46.72, Estimate (19), UWGC re-mapped on dapB  
 deleted genome, [SBW25 April 05],Plate=P04, Coordinates=K24, Trace=q294, [UWGC]  
 FT /colour=7  
 FT misc\_feature 720671..720670  
 FT /label=NR46.86

FT /note=NR46.86, Estimate (0), [SBW25 April 05],Plate=P04,  
Coordinates=O4, Trace=q216, [UWGC]  
FT /colour=7  
FT misc\_feature 720677..720676  
FT /label=NR46.95  
FT /note=NR46.95, Estimate (17), [SBW25 April 05],Plate=P04,  
Coordinates=O22, Trace=q288, [UWGC]  
FT /colour=7  
FT misc\_feature 720684..720683  
FT /label=NR46.50  
FT /note=NR46.50, Exact (0), [SBW25 April 05],Plate=P04,  
Coordinates=I4, Trace=q213, [UWGC]  
FT /colour=7  
FT misc\_feature 720686..720685  
FT /label=NR46.68  
FT /note=NR46.68, Exact (0), [SBW25 April 05],Plate=P04,  
Coordinates=K16, Trace=q262, [UWGC]  
FT /colour=7  
FT misc\_feature 720689..720688  
FT /label=NR46.90  
FT /note=NR46.90, Exact (0), [SBW25 April 05],Plate=P04,  
Coordinates=O12, Trace=q248, [UWGC]  
FT /colour=7  
FT misc\_feature complement(720690..720691)  
FT /label=NR46.P11  
FT /note=NR46.P11, Exact (0), [SBW25 April 05],Plate=P05,  
Coordinates=P10, Trace=q440, [UWGC]  
FT /colour=7  
FT misc\_feature 720694..720693  
FT /label=NR46.P01  
FT /note=NR46.P01, Exact (0), [SBW25 April 05],Plate=P05,  
Coordinates=N2, Trace=q407, [UWGC]  
FT /colour=7  
FT misc\_feature complement(720697..720698)  
FT /label=NR46.22  
FT /note=NR46.22, Estimate (27), UWGC re-mapped on dapB  
deleted genome, [SBW25 April 05],Plate=P04, Coordinates=C20, Trace=q274, [UWGC]  
FT /colour=7  
FT misc\_feature 720704..720703  
FT /label=NR46.47  
FT /note=NR46.47, Exact (0), [SBW25 April 05],Plate=P04,  
Coordinates=G22, Trace=q284, [UWGC]  
FT /colour=7  
FT misc\_feature 720704..720703  
FT /label=NR46.P02  
FT /note=NR46.P02, Estimate (0), [SBW25 April 05],Plate=P05,  
Coordinates=N4, Trace=q415, [UWGC]  
FT /colour=7  
FT misc\_feature 720704..720703  
FT /label=NR46.P12  
FT /note=NR46.P12, Exact (0), [SBW25 April 05],Plate=P05,  
Coordinates=P12, Trace=q448, [UWGC]  
FT /colour=7  
FT misc\_feature complement(720705..720706)  
FT /label=NR46.44  
FT /note=NR46.44, Exact (0), [SBW25 April 05],Plate=P04,  
Coordinates=G16, Trace=q260, [UWGC]

FT /colour=7  
 FT misc\_feature complement(720705..720706)  
 FT /label=NR46.69  
 FT /note=NR46.69, Exact (0), [SBW25 April 05],Plate=P04,  
 Coordinates=K18, Trace=q270, [UWGC]  
 FT /colour=7  
 FT misc\_feature complement(720705..720706)  
 FT /label=NR46.74  
 FT /note=NR46.74, Exact (0), [SBW25 April 05],Plate=P04,  
 Coordinates=M4, Trace=q215, [UWGC]  
 FT /colour=7  
 FT misc\_feature complement(720710..720711)  
 FT /label=NR46.10  
 FT /note=NR46.10, Exact (0), [SBW25 April 05],Plate=P04,  
 Coordinates=A20, Trace=q273, [UWGC]  
 FT /colour=7  
 FT misc\_feature complement(720715..720716)  
 FT /label=NR46.02  
 FT /note=NR46.02, Exact (0), [SBW25 April 05],Plate=P04,  
 Coordinates=A4, Trace=q209, [UWGC]  
 FT /colour=7  
 FT misc\_feature complement(720715..720716)  
 FT /label=NR46.12  
 FT /note=NR46.12, Exact (0), [SBW25 April 05],Plate=P04,  
 Coordinates=A24, Trace=q289, [UWGC]  
 FT /colour=7  
 FT misc\_feature complement(720715..720716)  
 FT /label=NR46.19  
 FT /note=NR46.19, Exact (0), [SBW25 April 05],Plate=P04,  
 Coordinates=C14, Trace=q250, [UWGC]  
 FT /colour=7  
 FT misc\_feature complement(720715..720716)  
 FT /label=NR46.94  
 FT /note=NR46.94, Exact (0), [SBW25 April 05],Plate=P04,  
 Coordinates=O20, Trace=q280, [UWGC]  
 FT /colour=7  
 FT misc\_feature 720721..720720  
 FT /label=NR46.P08  
 FT /note=NR46.P08, Estimate (22), [SBW25 April 05],Plate=P05,  
 Coordinates=P4, Trace=q416, [UWGC]  
 FT /colour=7  
 FT misc\_feature complement(720735..720736)  
 FT /label=NR46.82  
 FT /note=NR46.82, Estimate (20), UWGC re-mapped on dapB  
 deleted genome, [SBW25 April 05],Plate=P04, Coordinates=M20, Trace=q279, [UWGC]  
 FT /colour=7  
 FT misc\_feature complement(720742..720743)  
 FT /label=NR46.03  
 FT /note=NR46.03, Estimate (27), UWGC re-mapped on dapB  
 deleted genome, [SBW25 April 05],Plate=P04, Coordinates=A6, Trace=q217, [UWGC]  
 FT /colour=7  
 FT misc\_feature complement(720742..720743)  
 FT /label=NR46.09  
 FT /note=NR46.09, Estimate (27), UWGC re-mapped on dapB  
 deleted genome, [SBW25 April 05],Plate=P04, Coordinates=A18, Trace=q265, [UWGC]  
 FT /colour=7  
 FT misc\_feature complement(720742..720743)

FT /label=NR46.26  
FT /note=NR46.26, Estimate (27), UWGC re-mapped on dapB  
deleted genome, [SBW25 April 05],Plate=P04, Coordinates=E4, Trace=q211, [UWGC]  
FT /colour=7  
FT misc\_feature complement(720742..720743)  
FT /label=NR46.88  
FT /note=NR46.88, Estimate (27), UWGC re-mapped on dapB  
deleted genome, [SBW25 April 05],Plate=P04, Coordinates=O8, Trace=q232, [UWGC]  
FT /colour=7  
FT misc\_feature 720745..720744  
FT /label=NR46.36  
FT /note=NR46.36, Exact (0), [SBW25 April 05],Plate=P04,  
Coordinates=E24, Trace=q291, [UWGC]  
FT /colour=7  
FT misc\_feature complement(720747..720748)  
FT /label=NR46.P10  
FT /note=NR46.P10, Estimate (8), UWGC re-mapped on dapB  
deleted genome, [SBW25 April 05],Plate=P05, Coordinates=P8, Trace=q432, [UWGC]  
FT /colour=7  
FT misc\_feature complement(720823..720824)  
FT /label=NR46.32  
FT /note=NR46.32, Estimate (20), UWGC re-mapped on dapB  
deleted genome, [SBW25 April 05],Plate=P04, Coordinates=E16, Trace=q259, [UWGC]  
FT /colour=7  
FT misc\_feature complement(720838..720839)  
FT /label=NR46.P04  
FT /note=NR46.P04, Exact (manual correction), [SBW25 April  
05],Plate=P05, Coordinates=N8, Trace=q431, [UWGC]  
FT /colour=7  
FT misc\_feature complement(748824..748825)  
FT /label=NR53.P07  
FT /note=NR53.P07, Exact (manual correction), [SBW25 April  
05],Plate=P05, Coordinates=D14, Trace=q450, [UWGC]  
FT /colour=7  
FT misc\_feature complement(748824..748825)  
FT /label=NR53.P08  
FT /note=NR53.P08, Exact (manual correction), [SBW25 April  
05],Plate=P05, Coordinates=D16, Trace=q458, [UWGC]  
FT /colour=7  
FT misc\_feature complement(748829..748830)  
FT /label=NR20.M5.06  
FT /note=NR20.M5.06, Exact (0), [SBW25 April 05],Plate=PM5.1,  
Coordinates=F2, Trace=C460, [Oxford]  
FT /colour=10  
FT misc\_feature complement(748829..748830)  
FT /label=NR53.M5.15  
FT /note=NR53.M5.15, Exact (0), [SBW25 April 05],Plate=PM5.2,  
Coordinates=E1, Trace=C548, [Oxford]  
FT /colour=10  
FT misc\_feature complement(749089..749090)  
FT /label=NR53.10  
FT /note=NR53.10, Exact (0), [SBW25 April 05],Plate=,  
Coordinates=, Trace=NR53\_10, [Oxford]  
FT /colour=7  
FT misc\_feature complement(749089..749090)  
FT /label=NR53.M5.03

FT /note=NR53.M5.03, Exact (0), [SBW25 April 05],Plate=PM5.2,  
Coordinates=D1, Trace=C547, [Oxford]  
FT /colour=10  
FT misc\_feature complement(749246..749247)  
FT /label=NR53.M5.08  
FT /note=NR53.M5.08, Exact (0), [SBW25 April 05],Plate=PM5.2,  
Coordinates=D6, Trace=C587, [Oxford]  
FT /colour=10  
FT misc\_feature complement(749361..749362)  
FT /label=NR53.M5.14  
FT /note=NR53.M5.14, Exact (0), [SBW25 April 05],Plate=PM5.2,  
Coordinates=D12, Trace=C635, [Oxford]  
FT /colour=10  
FT misc\_feature complement(749395..749396)  
FT /label=NR53.M5.05  
FT /note=NR53.M5.05, Exact (0), [SBW25 April 05],Plate=PM5.2,  
Coordinates=D3, Trace=C563, [Oxford]  
FT /colour=10  
FT misc\_feature complement(749395..749396)  
FT /label=NR53.M5.11  
FT /note=NR53.M5.11, Exact (0), [SBW25 April 05],Plate=PM5.2,  
Coordinates=D9, Trace=C611, [Oxford]  
FT /colour=10  
FT misc\_feature complement(749395..749396)  
FT /label=NR53.P09  
FT /note=NR53.P09, Exact (manual correction), [SBW25 April  
05],Plate=P05, Coordinates=D18, Trace=q466, [UWGC]  
FT /colour=7  
FT misc\_feature 749586..749585  
FT /label=NR53.M5.01  
FT /note=NR53.M5.01, Exact (0), [SBW25 April 05],Plate=PM5.2,  
Coordinates=C11, Trace=C626, [Oxford]  
FT /colour=10  
FT misc\_feature complement(749652..749653)  
FT /label=NR53.M5.16  
FT /note=NR53.M5.16, Exact (0), [SBW25 April 05],Plate=PM5.2,  
Coordinates=E2, Trace=C556, [Oxford]  
FT /colour=10  
FT misc\_feature complement(749836..749837)  
FT /label=NR53.P02  
FT /note=NR53.P02, Exact (0), [SBW25 April 05],Plate=P05,  
Coordinates=B16, Trace=q457, [UWGC]  
FT /colour=7  
FT misc\_feature complement(749967..749968)  
FT /label=NR53.M5.06  
FT /note=NR53.M5.06, Exact (0), [SBW25 April 05],Plate=PM5.2,  
Coordinates=D4, Trace=C571, [Oxford]  
FT /colour=10  
FT misc\_feature complement(749988..749989)  
FT /label=NR53.M5.13  
FT /note=NR53.M5.13, Exact (0), [SBW25 April 05],Plate=PM5.2,  
Coordinates=D11, Trace=C627, [Oxford]  
FT /colour=10  
FT misc\_feature complement(750044..750045)  
FT /label=NR53.M5.07  
FT /note=NR53.M5.07, Exact (0), [SBW25 April 05],Plate=PM5.2,  
Coordinates=D5, Trace=C579, [Oxford]

FT /colour=10  
 FT misc\_feature 750273..750272  
 FT /label=NR53.M5.10  
 FT /note=NR53.M5.10, Exact (0), [SBW25 April 05],Plate=PM5.2,  
 Coordinates=D8, Trace=C603, [Oxford]  
 FT /colour=10  
 FT misc\_feature complement(750432..750433)  
 FT /label=NR53.08  
 FT /note=NR53.08, Exact (manual correction), [SBW25 April  
 05],Plate=, Coordinates=, Trace=NR53\_08, [Oxford]  
 FT /colour=7  
 FT misc\_feature complement(750434..750435)  
 FT /label=NR20.04  
 FT /note=NR20.04, Exact (manual correction), [SBW25 April  
 05],Plate=Oxford, Coordinates=0, Trace=NR20\_04, [Oxford]  
 FT /colour=7  
 FT misc\_feature 750608..750607  
 FT /label=NR53.M5.02  
 FT /note=NR53.M5.02, Exact (0), [SBW25 April 05],Plate=PM5.2,  
 Coordinates=C12, Trace=C634, [Oxford]  
 FT /colour=10  
 FT misc\_feature 750620..750621  
 FT /label=NR53.P10  
 FT /note=NR53.P10, Exact (manual correction), [SBW25 April  
 05],Plate=P05, Coordinates=D20, Trace=q474, [UWGC]  
 FT /colour=7  
 FT misc\_feature complement(750791..750792)  
 FT /label=NR53.05  
 FT /note=NR53.05, Exact (0), [SBW25 April 05],Plate=,  
 Coordinates=, Trace=NR53\_05, [Oxford]  
 FT /colour=7  
 FT misc\_feature 750793..750792  
 FT /label=NR53.P03  
 FT /note=NR53.P03, Estimate (7), [SBW25 April 05],Plate=P05,  
 Coordinates=B18, Trace=q465, [UWGC]  
 FT /colour=7  
 FT misc\_feature complement(750795..750796)  
 FT /label=NR53.06  
 FT /note=NR53.06, Estimate (98), [SBW25 April 05],Plate=,  
 Coordinates=, Trace=NR53\_06, [Oxford]  
 FT /colour=7  
 FT misc\_feature 750799..750798  
 FT /label=NR53.P06  
 FT /note=NR53.P06, Estimate (9), [SBW25 April 05],Plate=P05,  
 Coordinates=B24, Trace=q489, [UWGC]  
 FT /colour=7  
 FT misc\_feature complement(750807..750808)  
 FT /label=NR53.02  
 FT /note=NR53.02, Estimate (29), [SBW25 April 05],Plate=,  
 Coordinates=, Trace=NR53\_02, [Oxford]  
 FT /colour=7  
 FT misc\_feature complement(750807..750808)  
 FT /label=NR53.09  
 FT /note=NR53.09, Estimate (61), [SBW25 April 05],Plate=,  
 Coordinates=, Trace=NR53\_09, [Oxford]  
 FT /colour=7  
 FT misc\_feature 750808..750807

FT /label=NR53.P01  
 FT /note=NR53.P01, Exact (0), [SBW25 April 05],Plate=P05,  
 Coordinates=B14, Trace=q449, [UWGC]  
 FT /colour=7  
 FT misc\_feature complement(750808..750809)  
 FT /label=NR53.04  
 FT /note=NR53.04, Estimate (28), [SBW25 April 05],Plate=,  
 Coordinates=, Trace=NR53\_04, [Oxford]  
 FT /colour=7  
 FT misc\_feature complement(750810..750811)  
 FT /label=NR53.03  
 FT /note=NR53.03, Estimate (7), [SBW25 April 05],Plate=,  
 Coordinates=, Trace=NR53\_03, [Oxford]  
 FT /colour=7  
 FT misc\_feature 750810..750811  
 FT /label=NR54.117  
 FT /note=NR54.117, Exact (manual correction), [SBW25 April  
 05],Plate=P07, Coordinates=B24, Trace=q489, [UWGC]  
 FT /colour=7  
 FT misc\_feature complement(750811..750812)  
 FT /label=NR53.07  
 FT /note=NR53.07, Estimate (2), [SBW25 April 05],Plate=,  
 Coordinates=, Trace=NR53\_07, [Oxford]  
 FT /colour=7  
 FT misc\_feature 750812..750811  
 FT /label=NR53.P04  
 FT /note=NR53.P04, Estimate (13), [SBW25 April 05],Plate=P05,  
 Coordinates=B20, Trace=q473, [UWGC]  
 FT /colour=7  
 FT misc\_feature 750826..750825  
 FT /label=NR53.P12  
 FT /note=NR53.P12, Exact (0), [SBW25 April 05],Plate=P05,  
 Coordinates=D24, Trace=q490, [UWGC]  
 FT /colour=7  
 FT misc\_feature complement(750828..750829)  
 FT /label=NR53.01  
 FT /note=NR53.01, Estimate (3), [SBW25 April 05],Plate=,  
 Coordinates=, Trace=NR53\_01, [Oxford]  
 FT /colour=7  
 FT misc\_feature complement(771276..771277)  
 FT /label=NR12.68  
 FT /note=NR12.68, Estimate (24), [SBW25 April 05],Plate=P01,  
 Coordinates=K16, Trace=q262, [UWGC]  
 FT /colour=7  
 FT misc\_feature 772521..772520  
 FT /label=NR54.63  
 FT /note=NR54.63, Exact (manual correction), [SBW25 April  
 05],Plate=P05, Coordinates=K5, Trace=q122, [UWGC]  
 FT /colour=7  
 FT misc\_feature complement(789933..789934)  
 FT /label=NR20.05  
 FT /note=NR20.05, Estimate (33), [SBW25 April  
 05],Plate=Oxford, Coordinates=0, Trace=NR20\_05, [Oxford]  
 FT /colour=7  
 FT misc\_feature 817546..817545  
 FT /label=NR54.76



FT /note=NR54.76, Exact (manual correction), [SBW25 April  
 05],Plate=P05, Coordinates=M7, Trace=q131, [UWGC]  
 FT /colour=7  
 FT misc\_feature 817547..817546  
 FT /label=NR54.118  
 FT /note=NR54.118, Exact (0), [SBW25 April 05],Plate=P07,  
 Coordinates=C24, Trace=q290, [UWGC]  
 FT /colour=7  
 FT misc\_feature 817547..817546  
 FT /label=NR54.16  
 FT /note=NR54.16, Exact (0), [SBW25 April 05],Plate=P05,  
 Coordinates=C7, Trace=q126, [UWGC]  
 FT /colour=7  
 FT misc\_feature 817547..817546  
 FT /label=NR54.22  
 FT /note=NR54.22, Exact (0), [SBW25 April 05],Plate=P05,  
 Coordinates=C19, Trace=q174, [UWGC]  
 FT /colour=7  
 FT misc\_feature 817547..817546  
 FT /label=NR54.93  
 FT /note=NR54.93, Exact (0), [SBW25 April 05],Plate=P05,  
 Coordinates=O17, Trace=q172, [UWGC]  
 FT /colour=7  
 FT misc\_feature 817548..817549  
 FT /label=NR54.52  
 FT /note=NR54.52, Exact (manual correction), [SBW25 April  
 05],Plate=P05, Coordinates=I7, Trace=q129, [UWGC]  
 FT /colour=7  
 FT misc\_feature complement(817549..817550)  
 FT /label=NR54.02  
 FT /note=NR54.02, Exact (0), [SBW25 April 05],Plate=P05,  
 Coordinates=A3, Trace=NR54\_02, [Oxford]  
 FT /colour=7  
 FT misc\_feature complement(817557..817558)  
 FT /label=NR54.49  
 FT /note=NR54.49, Exact (0), [SBW25 April 05],Plate=P05,  
 Coordinates=I1, Trace=q105, [UWGC]  
 FT /colour=7  
 FT misc\_feature complement(817557..817558)  
 FT /label=NR54.56  
 FT /note=NR54.56, Exact (0), [SBW25 April 05],Plate=P05,  
 Coordinates=I15, Trace=q161, [UWGC]  
 FT /colour=7  
 FT misc\_feature complement(817557..817558)  
 FT /label=NR54.86  
 FT /note=NR54.86, Exact (0), [SBW25 April 05],Plate=P05,  
 Coordinates=O3, Trace=q116, [UWGC]  
 FT /colour=7  
 FT misc\_feature complement(817557..817558)  
 FT /label=NR54.88  
 FT /note=NR54.88, Exact (0), [SBW25 April 05],Plate=P05,  
 Coordinates=O7, Trace=q132, [UWGC]  
 FT /colour=7  
 FT misc\_feature 817558..817557  
 FT /label=NR54.105  
 FT /note=NR54.105, Exact (0), [SBW25 April 05],Plate=P07,  
 Coordinates=F23, Trace=q391, [UWGC]

FT /colour=7  
 FT misc\_feature 817558..817557  
 FT /label=NR54.115  
 FT /note=NR54.115, Exact (0), [SBW25 April 05],Plate=P07,  
 Coordinates=P23, Trace=q396, [UWGC]  
 FT /colour=7  
 FT misc\_feature 817558..817557  
 FT /label=NR54.29  
 FT /note=NR54.29, Exact (0), [SBW25 April 05],Plate=P05,  
 Coordinates=E9, Trace=q135, [UWGC]  
 FT /colour=7  
 FT misc\_feature 817558..817557  
 FT /label=NR54.37  
 FT /note=NR54.37, Exact (0), [SBW25 April 05],Plate=P05,  
 Coordinates=G1, Trace=q104, [UWGC]  
 FT /colour=7  
 FT misc\_feature 817558..817557  
 FT /label=NR54.59  
 FT /note=NR54.59, Exact (0), [SBW25 April 05],Plate=P05,  
 Coordinates=I21, Trace=q185, [UWGC]  
 FT /colour=7  
 FT misc\_feature 817558..817557  
 FT /label=NR54.70  
 FT /note=NR54.70, Exact (0), [SBW25 April 05],Plate=P05,  
 Coordinates=K19, Trace=q178, [UWGC]  
 FT /colour=7  
 FT misc\_feature complement(817558..817559)  
 FT /label=NR54.111  
 FT /note=NR54.111, Exact (manual correction), [SBW25 April  
 05],Plate=P07, Coordinates=L23, Trace=q394, [UWGC]  
 FT /colour=7  
 FT misc\_feature complement(817558..817559)  
 FT /label=NR54.120  
 FT /note=NR54.120, Exact (manual correction), [SBW25 April  
 05],Plate=P07, Coordinates=E24, Trace=q291, [UWGC]  
 FT /colour=7  
 FT misc\_feature complement(817558..817559)  
 FT /label=NR54.81  
 FT /note=NR54.81, Exact (0), [SBW25 April 05],Plate=P05,  
 Coordinates=M17, Trace=q171, [UWGC]  
 FT /colour=7  
 FT misc\_feature complement(817558..817559)  
 FT /label=NR54.99  
 FT /note=NR54.99, Exact (manual correction), [SBW25 April  
 05],Plate=P07, Coordinates=P22, Trace=q488, [UWGC]  
 FT /colour=7  
 FT misc\_feature 817559..817558  
 FT /label=NR54.19  
 FT /note=NR54.19, Exact (manual correction), [SBW25 April  
 05],Plate=P05, Coordinates=C13, Trace=q150, [UWGC]  
 FT /colour=7  
 FT misc\_feature 817560..817559  
 FT /label=NR54.14  
 FT /note=NR54.14, Exact (manual correction), [SBW25 April  
 05],Plate=P05, Coordinates=C3, Trace=q110, [UWGC]  
 FT /colour=7  
 FT misc\_feature complement(817561..817562)

FT /label=NR54.03  
 FT /note=NR54.03, Exact (0), [SBW25 April 05],Plate=P05,  
 Coordinates=A5, Trace=NR54\_03, [Oxford]  
 FT /colour=7  
 FT misc\_feature complement(817561..817562)  
 FT /label=NR54.10  
 FT /note=NR54.10, Exact (0), [SBW25 April 05],Plate=P05,  
 Coordinates=A19, Trace=NR54\_10, [Oxford]  
 FT /colour=7  
 FT misc\_feature complement(817561..817562)  
 FT /label=NR54.11  
 FT /note=NR54.11, Exact (0), [SBW25 April 05],Plate=P05,  
 Coordinates=A21, Trace=NR54\_11, [Oxford]  
 FT /colour=7  
 FT misc\_feature complement(817568..817569)  
 FT /label=NR54.38  
 FT /note=NR54.38, Exact (manual correction), [SBW25 April  
 05],Plate=P05, Coordinates=G3, Trace=q112, [UWGC]  
 FT /colour=7  
 FT misc\_feature complement(817569..817570)  
 FT /label=NR54.20  
 FT /note=NR54.20, Exact (0), [SBW25 April 05],Plate=P05,  
 Coordinates=C15, Trace=q158, [UWGC]  
 FT /colour=7  
 FT misc\_feature complement(817569..817570)  
 FT /label=NR54.55  
 FT /note=NR54.55, Exact (0), [SBW25 April 05],Plate=P05,  
 Coordinates=I13, Trace=q153, [UWGC]  
 FT /colour=7  
 FT misc\_feature complement(817569..817570)  
 FT /label=NR54.M5.10  
 FT /note=NR54.M5.10, Exact (0), [SBW25 April 05],Plate=PM5.2,  
 Coordinates=E12, Trace=C636, [Oxford]  
 FT /colour=10  
 FT misc\_feature complement(817579..817580)  
 FT /label=NR54.43  
 FT /note=NR54.43, Exact (manual correction), [SBW25 April  
 05],Plate=P05, Coordinates=G13, Trace=q152, [UWGC]  
 FT /colour=7  
 FT misc\_feature complement(817580..817581)  
 FT /label=NR54.122  
 FT /note=NR54.122, Exact (manual correction), [SBW25 April  
 05],Plate=P07, Coordinates=G24, Trace=q292, [UWGC]  
 FT /colour=7  
 FT misc\_feature complement(817590..817591)  
 FT /label=NR54.40  
 FT /note=NR54.40, Exact (manual correction), [SBW25 April  
 05],Plate=P05, Coordinates=G7, Trace=q128, [UWGC]  
 FT /colour=7  
 FT misc\_feature complement(817592..817593)  
 FT /label=NR54.74  
 FT /note=NR54.74, Exact (manual correction), [SBW25 April  
 05],Plate=P05, Coordinates=M3, Trace=q115, [UWGC]  
 FT /colour=7  
 FT misc\_feature 817594..817595  
 FT /label=NR54.54

FT /note=NR54.54, Exact (manual correction), [SBW25 April  
 05],Plate=P05, Coordinates=I11, Trace=q145, [UWGC]  
 FT /colour=7  
 FT misc\_feature complement(939843..939844)  
 FT /label=NR55.M5.24  
 FT /note=NR55.M5.24, Exact (0), [SBW25 April 05],Plate=PM5.2,  
 Coordinates=H11, Trace=C631, [Oxford]  
 FT /colour=10  
 FT misc\_feature complement(941686..941687)  
 FT /label=NR12.M5.01  
 FT /note=NR12.M5.01, Exact (0), [SBW25 April 05],Plate=PM5.1,  
 Coordinates=D4, Trace=C474, [Oxford]  
 FT /colour=10  
 FT misc\_feature 968652..968651  
 FT /label=NR12.M5.13  
 FT /note=NR12.M5.13, Exact (0), [SBW25 April 05],Plate=PM5.1,  
 Coordinates=E4, Trace=C475, [Oxford]  
 FT /colour=10  
 FT misc\_feature complement(987130..987131)  
 FT /label=NR12.24  
 FT /note=NR12.24, Exact (0), [SBW25 April 05],Plate=P01,  
 Coordinates=C24, Trace=q290, [UWGC]  
 FT /colour=7  
 FT misc\_feature complement(987713..987714)  
 FT /label=NR04.111  
 FT /note=NR04.111, Estimate (37), [SBW25 April 05],Plate=P07,  
 Coordinates=O01, Trace=q108, [UWGC]  
 FT /colour=7  
 FT misc\_feature 1005947..1005946  
 FT /label=NR55.M5.15  
 FT /note=NR55.M5.15, Exact (0), [SBW25 April 05],Plate=PM5.2,  
 Coordinates=H2, Trace=C559, [Oxford]  
 FT /colour=10  
 FT misc\_feature complement(1019032..1019033)  
 FT /label=NR04.16  
 FT /note=NR04.16, Exact (manual correction), [SBW25 April  
 05],Plate=P01, Coordinates=C7, Trace=q126, [UWGC]  
 FT /colour=7  
 FT misc\_feature 1019034..1019033  
 FT /label=NR04.29  
 FT /note=NR04.29, Estimate (18), [SBW25 April 05],Plate=P01,  
 Coordinates=E9, Trace=q135, [UWGC]  
 FT /colour=7  
 FT misc\_feature 1019035..1019034  
 FT /label=NR04.84  
 FT /note=NR04.84, Estimate (0), [SBW25 April 05],Plate=P01,  
 Coordinates=M23, Trace=q195, [UWGC]  
 FT /colour=7  
 FT misc\_feature 1019036..1019035  
 FT /label=NR04.04  
 FT /note=NR04.04, Exact (0), [SBW25 April 05],Plate=P01,  
 Coordinates=A7, Trace=q125, [UWGC]  
 FT /colour=7  
 FT misc\_feature 1019036..1019035  
 FT /label=NR04.05  
 FT /note=NR04.05, Exact (0), [SBW25 April 05],Plate=P01,  
 Coordinates=A9, Trace=q133, [UWGC]

FT /colour=7  
FT misc\_feature 1019036..1019035  
FT /label=NR04.07  
FT /note=NR04.07, Exact (0), [SBW25 April 05],Plate=P01,  
Coordinates=A13, Trace=q149, [UWGC]  
FT /colour=7  
FT misc\_feature 1019036..1019035  
FT /label=NR04.15  
FT /note=NR04.15, Exact (manual correction), [SBW25 April  
05],Plate=P01, Coordinates=C5, Trace=q118, [UWGC]  
FT /colour=7  
FT misc\_feature 1019036..1019035  
FT /label=NR04.20  
FT /note=NR04.20, Estimate (2), [SBW25 April 05],Plate=P01,  
Coordinates=C15, Trace=q158, [UWGC]  
FT /colour=7  
FT misc\_feature 1019036..1019035  
FT /label=NR04.22  
FT /note=NR04.22, Estimate (2), [SBW25 April 05],Plate=P01,  
Coordinates=C19, Trace=q174, [UWGC]  
FT /colour=7  
FT misc\_feature 1019036..1019035  
FT /label=NR04.24  
FT /note=NR04.24, Estimate (2), [SBW25 April 05],Plate=P01,  
Coordinates=C23, Trace=q190, [UWGC]  
FT /colour=7  
FT misc\_feature 1019036..1019035  
FT /label=NR04.26  
FT /note=NR04.26, Estimate (2), [SBW25 April 05],Plate=P01,  
Coordinates=E3, Trace=q111, [UWGC]  
FT /colour=7  
FT misc\_feature 1019036..1019035  
FT /label=NR04.30  
FT /note=NR04.30, Exact (0), [SBW25 April 05],Plate=P01,  
Coordinates=E11, Trace=q143, [UWGC]  
FT /colour=7  
FT misc\_feature 1019036..1019035  
FT /label=NR04.39  
FT /note=NR04.39, Estimate (2), [SBW25 April 05],Plate=P01,  
Coordinates=G5, Trace=q120, [UWGC]  
FT /colour=7  
FT misc\_feature 1019036..1019035  
FT /label=NR04.46  
FT /note=NR04.46, Exact (0), [SBW25 April 05],Plate=P01,  
Coordinates=G19, Trace=q176, [UWGC]  
FT /colour=7  
FT misc\_feature 1019036..1019035  
FT /label=NR04.68  
FT /note=NR04.68, Estimate (2), [SBW25 April 05],Plate=P01,  
Coordinates=K15, Trace=q162, [UWGC]  
FT /colour=7  
FT misc\_feature 1019036..1019035  
FT /label=NR04.75  
FT /note=NR04.75, Exact (0), [SBW25 April 05],Plate=P01,  
Coordinates=M5, Trace=q123, [UWGC]  
FT /colour=7  
FT misc\_feature 1019036..1019035

FT /label=NR04.78  
 FT /note=NR04.78, Exact (manual correction), [SBW25 April 05],Plate=P01, Coordinates=M11, Trace=q147, [UWGC]  
 FT /colour=7  
 FT misc\_feature 1019036..1019035  
 FT /label=NR04.82  
 FT /note=NR04.82, Exact (0), [SBW25 April 05],Plate=P01, Coordinates=M19, Trace=q179, [UWGC]  
 FT /colour=7  
 FT misc\_feature 1019036..1019035  
 FT /label=NR04.89  
 FT /note=NR04.89, Exact (0), [SBW25 April 05],Plate=P01, Coordinates=O9, Trace=q140, [UWGC]  
 FT /colour=7  
 FT misc\_feature 1019036..1019035  
 FT /label=NR04.95  
 FT /note=NR04.95, Exact (0), [SBW25 April 05],Plate=P01, Coordinates=O21, Trace=q188, [UWGC]  
 FT /colour=7  
 FT misc\_feature 1019036..1019035  
 FT /label=NR04.P02  
 FT /note=NR04.P02, Exact (0), [SBW25 April 05],Plate=P06, Coordinates=E3, Trace=q111, [UWGC]  
 FT /colour=7  
 FT misc\_feature 1019036..1019035  
 FT /label=NR04.P09  
 FT /note=NR04.P09, Exact (0), [SBW25 April 05],Plate=P06, Coordinates=G5, Trace=q120, [UWGC]  
 FT /colour=7  
 FT misc\_feature 1019036..1019035  
 FT /label=NR04.P10  
 FT /note=NR04.P10, Exact (0), [SBW25 April 05],Plate=P06, Coordinates=G7, Trace=q128, [UWGC]  
 FT /colour=7  
 FT misc\_feature 1019036..1019035  
 FT /label=NR04.P11  
 FT /note=NR04.P11, Exact (0), [SBW25 April 05],Plate=P06, Coordinates=G9, Trace=q136, [UWGC]  
 FT /colour=7  
 FT misc\_feature 1019037..1019036  
 FT /label=NR04.28  
 FT /note=NR04.28, Estimate (18), [SBW25 April 05],Plate=P01, Coordinates=E7, Trace=q127, [UWGC]  
 FT /colour=7  
 FT misc\_feature complement(1019037..1019038)  
 FT /label=NR04.01  
 FT /note=NR04.01, Exact (0), UWGC re-mapped on dapB deleted genome, [SBW25 April 05],Plate=P01, Coordinates=A1, Trace=q101, [UWGC]  
 FT /colour=7  
 FT misc\_feature complement(1019037..1019038)  
 FT /label=NR04.79  
 FT /note=NR04.79, Exact (manual correction), [SBW25 April 05],Plate=P01, Coordinates=M13, Trace=q155, [UWGC]  
 FT /colour=7  
 FT misc\_feature complement(1019040..1019041)  
 FT /label=NR04.14

FT /note=NR04.14, Exact (0), UWGC re-mapped on dapB deleted  
genome, [SBW25 April 05], Plate=P01, Coordinates=C3, Trace=q110, [UWGC]  
FT /colour=7  
FT misc\_feature complement(1019040..1019041)  
FT /label=NR04.70  
FT /note=NR04.70, Exact (0), UWGC re-mapped on dapB deleted  
genome, [SBW25 April 05], Plate=P01, Coordinates=K19, Trace=q178, [UWGC]  
FT /colour=7  
FT misc\_feature complement(1019040..1019041)  
FT /label=NR04.83  
FT /note=NR04.83, Exact (0), UWGC re-mapped on dapB deleted  
genome, [SBW25 April 05], Plate=P01, Coordinates=M21, Trace=q187, [UWGC]  
FT /colour=7  
FT misc\_feature complement(1019042..1019043)  
FT /label=NR04.M5.05  
FT /note=NR04.M5.05, Exact (0), [SBW25 April 05], Plate=PM5.1,  
Coordinates=A5, Trace=C479, [Oxford]  
FT /colour=10  
FT misc\_feature complement(1019045..1019046)  
FT /label=NR04.34  
FT /note=NR04.34, Estimate (3), UWGC re-mapped on dapB deleted  
genome, [SBW25 April 05], Plate=P01, Coordinates=E19, Trace=q175, [UWGC]  
FT /colour=7  
FT misc\_feature complement(1019045..1019046)  
FT /label=NR04.59  
FT /note=NR04.59, Estimate (3), UWGC re-mapped on dapB deleted  
genome, [SBW25 April 05], Plate=P01, Coordinates=I21, Trace=q185, [UWGC]  
FT /colour=7  
FT misc\_feature complement(1019046..1019047)  
FT /label=NR04.03  
FT /note=NR04.03, Estimate (4), UWGC re-mapped on dapB deleted  
genome, [SBW25 April 05], Plate=P01, Coordinates=A5, Trace=q117, [UWGC]  
FT /colour=7  
FT misc\_feature complement(1019046..1019047)  
FT /label=NR04.18  
FT /note=NR04.18, Estimate (4), UWGC re-mapped on dapB deleted  
genome, [SBW25 April 05], Plate=P01, Coordinates=C11, Trace=q142, [UWGC]  
FT /colour=7  
FT misc\_feature complement(1019046..1019047)  
FT /label=NR04.21  
FT /note=NR04.21, Estimate (4), UWGC re-mapped on dapB deleted  
genome, [SBW25 April 05], Plate=P01, Coordinates=C17, Trace=q166, [UWGC]  
FT /colour=7  
FT misc\_feature complement(1019046..1019047)  
FT /label=NR04.27  
FT /note=NR04.27, Estimate (4), UWGC re-mapped on dapB deleted  
genome, [SBW25 April 05], Plate=P01, Coordinates=E5, Trace=q119, [UWGC]  
FT /colour=7  
FT misc\_feature complement(1019046..1019047)  
FT /label=NR04.31  
FT /note=NR04.31, Estimate (4), UWGC re-mapped on dapB deleted  
genome, [SBW25 April 05], Plate=P01, Coordinates=E13, Trace=q151, [UWGC]  
FT /colour=7  
FT misc\_feature complement(1019046..1019047)  
FT /label=NR04.44  
FT /note=NR04.44, Estimate (4), UWGC re-mapped on dapB deleted  
genome, [SBW25 April 05], Plate=P01, Coordinates=G15, Trace=q160, [UWGC]

FT /colour=7  
 FT misc\_feature complement(1019046..1019047)  
 FT /label=NR04.45  
 FT /note=NR04.45, Estimate (4), UWGC re-mapped on dapB deleted  
 genome, [SBW25 April 05],Plate=P01, Coordinates=G17, Trace=q168, [UWGC]  
 FT /colour=7  
 FT misc\_feature complement(1019046..1019047)  
 FT /label=NR04.49  
 FT /note=NR04.49, Estimate (4), UWGC re-mapped on dapB deleted  
 genome, [SBW25 April 05],Plate=P01, Coordinates=I1, Trace=q105, [UWGC]  
 FT /colour=7  
 FT misc\_feature complement(1019046..1019047)  
 FT /label=NR04.57  
 FT /note=NR04.57, Estimate (4), UWGC re-mapped on dapB deleted  
 genome, [SBW25 April 05],Plate=P01, Coordinates=I17, Trace=q169, [UWGC]  
 FT /colour=7  
 FT misc\_feature complement(1019046..1019047)  
 FT /label=NR04.76  
 FT /note=NR04.76, Estimate (4), UWGC re-mapped on dapB deleted  
 genome, [SBW25 April 05],Plate=P01, Coordinates=M7, Trace=q131, [UWGC]  
 FT /colour=7  
 FT misc\_feature complement(1019046..1019047)  
 FT /label=NR04.81  
 FT /note=NR04.81, Estimate (4), UWGC re-mapped on dapB deleted  
 genome, [SBW25 April 05],Plate=P01, Coordinates=M17, Trace=q171, [UWGC]  
 FT /colour=7  
 FT misc\_feature complement(1019046..1019047)  
 FT /label=NR04.87  
 FT /note=NR04.87, Estimate (4), UWGC re-mapped on dapB deleted  
 genome, [SBW25 April 05],Plate=P01, Coordinates=O5, Trace=q124, [UWGC]  
 FT /colour=7  
 FT misc\_feature complement(1019046..1019047)  
 FT /label=NR04.P05  
 FT /note=NR04.P05, Estimate (4), UWGC re-mapped on dapB  
 deleted genome, [SBW25 April 05],Plate=P06, Coordinates=E9, Trace=q135, [UWGC]  
 FT /colour=7  
 FT misc\_feature complement(1019047..1019048)  
 FT /label=NR04.64  
 FT /note=NR04.64, Exact (0), UWGC re-mapped on dapB deleted  
 genome, [SBW25 April 05],Plate=P01, Coordinates=K7, Trace=q130, [UWGC]  
 FT /colour=7  
 FT misc\_feature complement(1019047..1019048)  
 FT /label=NR04.M5.01  
 FT /note=NR04.M5.01, Exact (0), [SBW25 April 05],Plate=PM5.1,  
 Coordinates=A1, Trace=C436, [Oxford]  
 FT /colour=10  
 FT misc\_feature complement(1019047..1019048)  
 FT /label=NR04.M5.02  
 FT /note=NR04.M5.02, Exact (0), [SBW25 April 05],Plate=PM5.1,  
 Coordinates=A2, Trace=C455, [Oxford]  
 FT /colour=10  
 FT misc\_feature complement(1019047..1019048)  
 FT /label=NR04.M5.06  
 FT /note=NR04.M5.06, Exact (0), [SBW25 April 05],Plate=PM5.1,  
 Coordinates=A6, Trace=C487, [Oxford]  
 FT /colour=10  
 FT misc\_feature complement(1019047..1019048)



FT /label=NR04.M5.07  
 FT /note=NR04.M5.07, Exact (0), [SBW25 April 05],Plate=PM5.1,  
 Coordinates=A7, Trace=C495, [Oxford]  
 FT /colour=10  
 FT misc\_feature complement(1019047..1019048)  
 FT /label=NR04.M5.09  
 FT /note=NR04.M5.09, Exact (0), [SBW25 April 05],Plate=PM5.1,  
 Coordinates=A9, Trace=C511, [Oxford]  
 FT /colour=10  
 FT misc\_feature complement(1019047..1019048)  
 FT /label=NR04.M5.10  
 FT /note=NR04.M5.10, Exact (0), [SBW25 April 05],Plate=PM5.1,  
 Coordinates=A10, Trace=C519, [Oxford]  
 FT /colour=10  
 FT misc\_feature complement(1019047..1019048)  
 FT /label=NR04.M5.11  
 FT /note=NR04.M5.11, Exact (0), [SBW25 April 05],Plate=PM5.1,  
 Coordinates=A11, Trace=C527, [Oxford]  
 FT /colour=10  
 FT misc\_feature complement(1019047..1019048)  
 FT /label=NR04.M5.13  
 FT /note=NR04.M5.13, Exact (0), [SBW25 April 05],Plate=PM5.1,  
 Coordinates=B1, Trace=C437, [Oxford]  
 FT /colour=10  
 FT misc\_feature complement(1019047..1019048)  
 FT /label=NR04.M5.14  
 FT /note=NR04.M5.14, Exact (0), [SBW25 April 05],Plate=PM5.1,  
 Coordinates=B2, Trace=C456, [Oxford]  
 FT /colour=10  
 FT misc\_feature complement(1019047..1019048)  
 FT /label=NR04.P07  
 FT /note=NR04.P07, Exact (0), UWGC re-mapped on dapB deleted  
 genome, [SBW25 April 05],Plate=P06, Coordinates=G1, Trace=q104, [UWGC]  
 FT /colour=7  
 FT misc\_feature complement(1019070..1019071)  
 FT /label=NR04.25  
 FT /note=NR04.25, Estimate (28), UWGC re-mapped on dapB  
 deleted genome, [SBW25 April 05],Plate=P01, Coordinates=E1, Trace=q103, [UWGC]  
 FT /colour=7  
 FT misc\_feature complement(1019071..1019072)  
 FT /label=NR04.73  
 FT /note=NR04.73, Estimate (29), UWGC re-mapped on dapB  
 deleted genome, [SBW25 April 05],Plate=P01, Coordinates=M1, Trace=q107, [UWGC]  
 FT /colour=7  
 FT misc\_feature complement(1019071..1019072)  
 FT /label=NR04.92  
 FT /note=NR04.92, Estimate (29), UWGC re-mapped on dapB  
 deleted genome, [SBW25 April 05],Plate=P01, Coordinates=O15, Trace=q164, [UWGC]  
 FT /colour=7  
 FT misc\_feature complement(1019072..1019073)  
 FT /label=NR04.37  
 FT /note=NR04.37, Estimate (25), UWGC re-mapped on dapB  
 deleted genome, [SBW25 April 05],Plate=P01, Coordinates=G1, Trace=q104, [UWGC]  
 FT /colour=7  
 FT misc\_feature complement(1019074..1019075)  
 FT /label=NR04.108

FT /note=NR04.108, Estimate (32), [SBW25 April 05],Plate=P07,  
Coordinates=L01, Trace=q306, [UWGC]  
FT /colour=7  
FT misc\_feature complement(1019078..1019079)  
FT /label=NR04.115  
FT /note=NR04.115, Estimate (36), [SBW25 April 05],Plate=P07,  
Coordinates=C02, Trace=q202, [UWGC]  
FT /colour=7  
FT misc\_feature complement(1019086..1019087)  
FT /label=NR04.12  
FT /note=NR04.12, Exact (0), UWGC re-mapped on dapB deleted  
genome, [SBW25 April 05],Plate=P01, Coordinates=A23, Trace=q189, [UWGC]  
FT /colour=7  
FT misc\_feature 1019098..1019097  
FT /label=NR04.P06  
FT /note=NR04.P06, Exact (0), [SBW25 April 05],Plate=P06,  
Coordinates=E11, Trace=q143, [UWGC]  
FT /colour=7  
FT misc\_feature 1019127..1019126  
FT /label=NR04.52  
FT /note=NR04.52, Estimate (331), [SBW25 April 05],Plate=P01,  
Coordinates=I7, Trace=q129, [UWGC]  
FT /colour=7  
FT misc\_feature 1019161..1019160  
FT /label=NR04.112  
FT /note=NR04.112, Estimate (127), [SBW25 April  
05],Plate=P07, Coordinates=P01, Trace=q308, [UWGC]  
FT /colour=7  
FT misc\_feature 1019164..1019163  
FT /label=NR04.41  
FT /note=NR04.41, Estimate (0), [SBW25 April 05],Plate=P01,  
Coordinates=G9, Trace=q136, [UWGC]  
FT /colour=7  
FT misc\_feature 1019166..1019165  
FT /label=NR04.77  
FT /note=NR04.77, Estimate (32), [SBW25 April 05],Plate=P01,  
Coordinates=M9, Trace=q139, [UWGC]  
FT /colour=7  
FT misc\_feature complement(1019175..1019176)  
FT /label=NR04.06  
FT /note=NR04.06, Exact (0), [SBW25 April 05],Plate=P01,  
Coordinates=A11, Trace=q141, [UWGC]  
FT /colour=7  
FT misc\_feature 1019195..1019194  
FT /label=NR04.105  
FT /note=NR04.105, Estimate (11), [SBW25 April 05],Plate=P07,  
Coordinates=I01, Trace=q105, [UWGC]  
FT /colour=7  
FT misc\_feature complement(1019195..1019196)  
FT /label=NR04.98  
FT /note=NR04.98, Exact (0), [SBW25 April 05],Plate=P07,  
Coordinates=B01, Trace=q301, [UWGC]  
FT /colour=7  
FT misc\_feature 1019196..1019195  
FT /label=NR04.17  
FT /note=NR04.17, Exact (0), [SBW25 April 05],Plate=P01,  
Coordinates=C9, Trace=q134, [UWGC]

```

FT          /colour=7
FT  misc_feature  complement(1019200..1019201)
FT          /label=NR04.51
FT          /note=NR04.51, Estimate (26), UWGC re-mapped on dapB
deleted genome, [SBW25 April 05],Plate=P01, Coordinates=I5, Trace=q121, [UWGC]
FT          /colour=7
FT  misc_feature  complement(1019209..1019210)
FT          /label=NR04.11
FT          /note=NR04.11, Exact (manual correction), [SBW25 April
05],Plate=P01, Coordinates=A21, Trace=q181, [UWGC]
FT          /colour=7
FT  misc_feature  complement(1019228..1019229)
FT          /label=NR04.60
FT          /note=NR04.60, Exact (0), [SBW25 April 05],Plate=P01,
Coordinates=I23, Trace=q193, [UWGC]
FT          /colour=7
FT  misc_feature  complement(1019246..1019247)
FT          /label=NR04.13
FT          /note=NR04.13, Exact (0), [SBW25 April 05],Plate=P01,
Coordinates=C1, Trace=q102, [UWGC]
FT          /colour=7
FT  misc_feature  1019260..1019259
FT          /label=NR04.80
FT          /note=NR04.80, Exact (0), [SBW25 April 05],Plate=P01,
Coordinates=M15, Trace=q163, [UWGC]
FT          /colour=7
FT  misc_feature  complement(1019289..1019290)
FT          /label=NR04.54
FT          /note=NR04.54, Exact (0), [SBW25 April 05],Plate=P01,
Coordinates=I11, Trace=q145, [UWGC]
FT          /colour=7
FT  misc_feature  complement(1019289..1019290)
FT          /label=NR04.67
FT          /note=NR04.67, Exact (0), [SBW25 April 05],Plate=P01,
Coordinates=K13, Trace=q154, [UWGC]
FT          /colour=7
FT  misc_feature  complement(1019294..1019295)
FT          /label=NR04.43
FT          /note=NR04.43, Estimate (0), [SBW25 April 05],Plate=P01,
Coordinates=G13, Trace=q152, [UWGC]
FT          /colour=7
FT  misc_feature  complement(1019294..1019295)
FT          /label=NR04.63
FT          /note=NR04.63, Exact (0), [SBW25 April 05],Plate=P01,
Coordinates=K5, Trace=q122, [UWGC]
FT          /colour=7
FT  misc_feature  1019311..1019310
FT          /label=NR04.96
FT          /note=NR04.96, Exact (0), [SBW25 April 05],Plate=P01,
Coordinates=O23, Trace=q196, [UWGC]
FT          /colour=7
FT  misc_feature  1019327..1019326
FT          /label=NR04.85
FT          /note=NR04.85, Exact (0), [SBW25 April 05],Plate=P01,
Coordinates=O1, Trace=q108, [UWGC]
FT          /colour=7
FT  misc_feature  1019348..1019347

```

FT /label=NR04.103  
FT /note=NR04.103, Estimate (50), [SBW25 April 05],Plate=P07,  
Coordinates=G01, Trace=q104, [UWGC]  
FT /colour=7  
FT misc\_feature complement(1019355..1019356)  
FT /label=NR04.53  
FT /note=NR04.53, Estimate (1), [SBW25 April 05],Plate=P01,  
Coordinates=I9, Trace=q137, [UWGC]  
FT /colour=7  
FT misc\_feature complement(1019355..1019356)  
FT /label=NR04.94  
FT /note=NR04.94, Exact (0), [SBW25 April 05],Plate=P01,  
Coordinates=O19, Trace=q180, [UWGC]  
FT /colour=7  
FT misc\_feature complement(1019356..1019357)  
FT /label=NR04.P04  
FT /note=NR04.P04, Exact (0), [SBW25 April 05],Plate=P06,  
Coordinates=E7, Trace=q127, [UWGC]  
FT /colour=7  
FT misc\_feature complement(1019389..1019390)  
FT /label=NR04.33  
FT /note=NR04.33, Estimate (33), [SBW25 April 05],Plate=P01,  
Coordinates=E17, Trace=q167, [UWGC]  
FT /colour=7  
FT misc\_feature complement(1019392..1019393)  
FT /label=NR04.19  
FT /note=NR04.19, Exact (0), [SBW25 April 05],Plate=P01,  
Coordinates=C13, Trace=q150, [UWGC]  
FT /colour=7  
FT misc\_feature complement(1019392..1019393)  
FT /label=NR04.40  
FT /note=NR04.40, Exact (0), [SBW25 April 05],Plate=P01,  
Coordinates=G7, Trace=q128, [UWGC]  
FT /colour=7  
FT misc\_feature complement(1019422..1019423)  
FT /label=NR04.88  
FT /note=NR04.88, Exact (0), [SBW25 April 05],Plate=P01,  
Coordinates=O7, Trace=q132, [UWGC]  
FT /colour=7  
FT misc\_feature complement(1019426..1019427)  
FT /label=NR04.74  
FT /note=NR04.74, Estimate (23), [SBW25 April 05],Plate=P01,  
Coordinates=M3, Trace=q115, [UWGC]  
FT /colour=7  
FT misc\_feature complement(1019433..1019434)  
FT /label=NR04.66  
FT /note=NR04.66, Exact (0), [SBW25 April 05],Plate=P01,  
Coordinates=K11, Trace=q146, [UWGC]  
FT /colour=7  
FT misc\_feature complement(1019438..1019439)  
FT /label=NR04.02  
FT /note=NR04.02, Exact (0), [SBW25 April 05],Plate=P01,  
Coordinates=A3, Trace=q109, [UWGC]  
FT /colour=7  
FT misc\_feature complement(1019452..1019453)  
FT /label=NR04.58

FT /note=NR04.58, Exact (0), [SBW25 April 05],Plate=P01,  
 Coordinates=I19, Trace=q177, [UWGC]  
 FT /colour=7  
 FT misc\_feature 1019459..1019458  
 FT /label=NR04.72  
 FT /note=NR04.72, Estimate (0), [SBW25 April 05],Plate=P01,  
 Coordinates=K23, Trace=q194, [UWGC]  
 FT /colour=7  
 FT misc\_feature 1019487..1019486  
 FT /label=NR04.71  
 FT /note=NR04.71, Exact (0), [SBW25 April 05],Plate=P01,  
 Coordinates=K21, Trace=q186, [UWGC]  
 FT /colour=7  
 FT misc\_feature complement(1019497..1019498)  
 FT /label=NR04.56  
 FT /note=NR04.56, Exact (0), [SBW25 April 05],Plate=P01,  
 Coordinates=I15, Trace=q161, [UWGC]  
 FT /colour=7  
 FT misc\_feature complement(1019521..1019522)  
 FT /label=NR04.P08  
 FT /note=NR04.P08, Exact (0), [SBW25 April 05],Plate=P06,  
 Coordinates=G3, Trace=q112, [UWGC]  
 FT /colour=7  
 FT misc\_feature complement(1019555..1019556)  
 FT /label=NR04.110  
 FT /note=NR04.110, Estimate (29), [SBW25 April 05],Plate=P07,  
 Coordinates=N01, Trace=q307, [UWGC]  
 FT /colour=7  
 FT misc\_feature complement(1019557..1019558)  
 FT /label=NR04.113  
 FT /note=NR04.113, Estimate (32), [SBW25 April 05],Plate=P07,  
 Coordinates=A02, Trace=q201, [UWGC]  
 FT /colour=7  
 FT misc\_feature complement(1019571..1019572)  
 FT /label=NR04.47  
 FT /note=NR04.47, Estimate (37), [SBW25 April 05],Plate=P01,  
 Coordinates=G21, Trace=q184, [UWGC]  
 FT /colour=7  
 FT misc\_feature 1019620..1019619  
 FT /label=NR04.99  
 FT /note=NR04.99, Estimate (67), [SBW25 April 05],Plate=P07,  
 Coordinates=C01, Trace=q102, [UWGC]  
 FT /colour=7  
 FT misc\_feature complement(1019637..1019638)  
 FT /label=NR04.48  
 FT /note=NR04.48, Exact (0), [SBW25 April 05],Plate=P01,  
 Coordinates=G23, Trace=q192, [UWGC]  
 FT /colour=7  
 FT misc\_feature complement(1019639..1019640)  
 FT /label=NR12.48  
 FT /note=NR12.48, Estimate (71), [SBW25 April 05],Plate=P01,  
 Coordinates=G24, Trace=q292, [UWGC]  
 FT /colour=7  
 FT misc\_feature complement(1019646..1019647)  
 FT /label=NR04.86  
 FT /note=NR04.86, Exact (0), [SBW25 April 05],Plate=P01,  
 Coordinates=O3, Trace=q116, [UWGC]

FT /colour=7  
FT misc\_feature 1019655..1019654  
FT /label=NR04.36  
FT /note=NR04.36, Estimate (1), [SBW25 April 05],Plate=P01,  
Coordinates=E23, Trace=q191, [UWGC]  
FT /colour=7  
FT misc\_feature 1019660..1019659  
FT /label=NR04.23  
FT /note=NR04.23, Estimate (3), [SBW25 April 05],Plate=P01,  
Coordinates=C21, Trace=q182, [UWGC]  
FT /colour=7  
FT misc\_feature complement(1019664..1019665)  
FT /label=NR04.65  
FT /note=NR04.65, Exact (0), [SBW25 April 05],Plate=P01,  
Coordinates=K9, Trace=q138, [UWGC]  
FT /colour=7  
FT misc\_feature complement(1019665..1019666)  
FT /label=NR04.62  
FT /note=NR04.62, Estimate (0), [SBW25 April 05],Plate=P01,  
Coordinates=K3, Trace=q114, [UWGC]  
FT /colour=7  
FT misc\_feature 1019669..1019668  
FT /label=NR04.119  
FT /note=NR04.119, Estimate (46), [SBW25 April 05],Plate=P07,  
Coordinates=G02, Trace=q204, [UWGC]  
FT /colour=7  
FT misc\_feature 1019682..1019681  
FT /label=NR04.69  
FT /note=NR04.69, Estimate (25), [SBW25 April 05],Plate=P01,  
Coordinates=K17, Trace=q170, [UWGC]  
FT /colour=7  
FT misc\_feature complement(1019683..1019684)  
FT /label=NR04.116  
FT /note=NR04.116, Estimate (11), [SBW25 April 05],Plate=P07,  
Coordinates=D02, Trace=q402, [UWGC]  
FT /colour=7  
FT misc\_feature 1019707..1019706  
FT /label=NR04.118  
FT /note=NR04.118, Estimate (8), [SBW25 April 05],Plate=P07,  
Coordinates=F02, Trace=q403, [UWGC]  
FT /colour=7  
FT misc\_feature 1019707..1019706  
FT /label=NR04.61  
FT /note=NR04.61, Exact (0), [SBW25 April 05],Plate=P01,  
Coordinates=K1, Trace=q106, [UWGC]  
FT /colour=7  
FT misc\_feature 1019707..1019706  
FT /label=NR04.90  
FT /note=NR04.90, Exact (0), [SBW25 April 05],Plate=P01,  
Coordinates=O11, Trace=q148, [UWGC]  
FT /colour=7  
FT misc\_feature 1019707..1019706  
FT /label=NR04.91  
FT /note=NR04.91, Exact (0), [SBW25 April 05],Plate=P01,  
Coordinates=O13, Trace=q156, [UWGC]  
FT /colour=7  
FT misc\_feature complement(1019718..1019719)

FT /label=NR04.93  
 FT /note=NR04.93, Exact (0), [SBW25 April 05],Plate=P01,  
 Coordinates=O17, Trace=q172, [UWGC]  
 FT /colour=7  
 FT misc\_feature complement(1019718..1019719)  
 FT /label=NR04.P12  
 FT /note=NR04.P12, Exact (0), [SBW25 April 05],Plate=P06,  
 Coordinates=G11, Trace=q144, [UWGC]  
 FT /colour=7  
 FT misc\_feature complement(1060926..1060927)  
 FT /label=NR09.92  
 FT /note=NR09.92, Estimate (116), [SBW25 April 05],Plate=P07,  
 Coordinates=F09, Trace=q335, [UWGC]  
 FT /colour=7  
 FT misc\_feature 1063212..1063211  
 FT /label=NR12.M5.09  
 FT /note=NR12.M5.09, Exact (0), [SBW25 April 05],Plate=PM5.1,  
 Coordinates=D12, Trace=C539, [Oxford]  
 FT /colour=10  
 FT misc\_feature complement(1092548..1092549)  
 FT /label=NR20.29  
 FT /note=NR20.29, Estimate (42), [SBW25 April 05],Plate=P07,  
 Coordinates=A11, Trace=q141, [UWGC]  
 FT /colour=7  
 FT misc\_feature complement(1092569..1092570)  
 FT /label=NR20.19  
 FT /note=NR20.19, Estimate (63), [SBW25 April 05],Plate=P07,  
 Coordinates=G10, Trace=q236, [UWGC]  
 FT /colour=7  
 FT misc\_feature complement(1092579..1092580)  
 FT /label=NR09.72  
 FT /note=NR09.72, Estimate (73), [SBW25 April 05],Plate=P07,  
 Coordinates=B08, Trace=q425, [UWGC]  
 FT /colour=7  
 FT misc\_feature complement(1092582..1092583)  
 FT /label=NR34.106  
 FT /note=NR34.106, Estimate (76), [SBW25 April 05],Plate=P07,  
 Coordinates=I13, Trace=q153, [UWGC]  
 FT /colour=7  
 FT misc\_feature complement(1092601..1092602)  
 FT /label=NR46.77  
 FT /note=NR46.77, Estimate (95), UWGC re-mapped on dapB  
 deleted genome, [SBW25 April 05],Plate=P04, Coordinates=M10, Trace=q239, [UWGC]  
 FT /colour=7  
 FT misc\_feature 1107051..1107050  
 FT /label=NR55.M5.19  
 FT /note=NR55.M5.19, Exact (0), [SBW25 April 05],Plate=PM5.2,  
 Coordinates=H6, Trace=C591, [Oxford]  
 FT /colour=10  
 FT misc\_feature complement(1117557..1117558)  
 FT /label=NR12.43  
 FT /note=NR12.43, Estimate (230), [SBW25 April 05],Plate=P01,  
 Coordinates=G14, Trace=q252, [UWGC]  
 FT /colour=7  
 FT misc\_feature complement(1148456..1148457)  
 FT /label=NR43.10

FT /note=NR43.10, Exact (0), [SBW25 April 05],Plate=P04,  
 Coordinates=A19, Trace=q173, [UWGC]  
 FT /colour=7  
 FT misc\_feature complement(1148462..1148463)  
 FT /label=NR43.21  
 FT /note=NR43.21, Exact (0), [SBW25 April 05],Plate=P04,  
 Coordinates=C17, Trace=q166, [UWGC]  
 FT /colour=7  
 FT misc\_feature 1148479..1148478  
 FT /label=NR43.56  
 FT /note=NR43.56, Exact (0), [SBW25 April 05],Plate=P04,  
 Coordinates=I15, Trace=q161, [UWGC]  
 FT /colour=7

FT misc\_feature complement(1148517..1148518)  
 FT /label=NR43.P04  
 FT /note=NR43.P04, Estimate (5), [SBW25 April 05],Plate=P05,  
 Coordinates=J20, Trace=q477, [UWGC]  
 FT /colour=7  
 FT misc\_feature 1148539..1148538  
 FT /label=NR43.P12  
 FT /note=NR43.P12, Estimate (8), [SBW25 April 05],Plate=P05,  
 Coordinates=L24, Trace=q494, [UWGC]  
 FT /colour=7  
 FT misc\_feature 1148552..1148551  
 FT /label=NR43.71  
 FT /note=NR43.71, Exact (0), [SBW25 April 05],Plate=P04,  
 Coordinates=K21, Trace=q186, [UWGC]  
 FT /colour=7  
 FT misc\_feature complement(1148559..1148560)  
 FT /label=NR43.P05  
 FT /note=NR43.P05, Estimate (3), [SBW25 April 05],Plate=P05,  
 Coordinates=J22, Trace=q485, [UWGC]  
 FT /colour=7  
 FT misc\_feature 1148563..1148562  
 FT /label=NR43.54  
 FT /note=NR43.54, Exact (0), [SBW25 April 05],Plate=P04,  
 Coordinates=I11, Trace=q145, [UWGC]  
 FT /colour=7  
 FT misc\_feature complement(1148563..1148564)  
 FT /label=NR43.P07  
 FT /note=NR43.P07, Exact (0), [SBW25 April 05],Plate=P05,  
 Coordinates=L14, Trace=q454, [UWGC]  
 FT /colour=7  
 FT misc\_feature 1148564..1148563  
 FT /label=NR43.P08  
 FT /note=NR43.P08, Estimate (0), [SBW25 April 05],Plate=P05,  
 Coordinates=L16, Trace=q462, [UWGC]  
 FT /colour=7  
 FT misc\_feature 1148615..1148614  
 FT /label=NR43.P03  
 FT /note=NR43.P03, Estimate (1), [SBW25 April 05],Plate=P05,  
 Coordinates=J18, Trace=q469, [UWGC]  
 FT /colour=7  
 FT misc\_feature 1148616..1148615  
 FT /label=NR43.P01



FT /note=NR43.P01, Exact (0), [SBW25 April 05],Plate=P05,  
Coordinates=J14, Trace=q453, [UWGC]  
FT /colour=7  
FT misc\_feature complement(1148627..1148628)  
FT /label=NR43.78  
FT /note=NR43.78, Exact (0), [SBW25 April 05],Plate=P04,  
Coordinates=M11, Trace=q147, [UWGC]  
FT /colour=7  
FT misc\_feature 1148631..1148630  
FT /label=NR43.66  
FT /note=NR43.66, Estimate (30), [SBW25 April 05],Plate=P04,  
Coordinates=K11, Trace=q146, [UWGC]  
FT /colour=7  
FT misc\_feature 1148635..1148634  
FT /label=NR43.46  
FT /note=NR43.46, Estimate (28), [SBW25 April 05],Plate=P04,  
Coordinates=G19, Trace=q176, [UWGC]  
FT /colour=7  
FT misc\_feature complement(1148638..1148639)  
FT /label=NR43.05  
FT /note=NR43.05, Exact (0), [SBW25 April 05],Plate=P04,  
Coordinates=A9, Trace=q133, [UWGC]  
FT /colour=7  
FT misc\_feature complement(1148646..1148647)  
FT /label=NR43.39  
FT /note=NR43.39, Exact (0), [SBW25 April 05],Plate=P04,  
Coordinates=G5, Trace=q120, [UWGC]  
FT /colour=7  
FT misc\_feature complement(1148647..1148648)  
FT /label=NR43.76  
FT /note=NR43.76, Estimate (4), [SBW25 April 05],Plate=P04,  
Coordinates=M7, Trace=q131, [UWGC]  
FT /colour=7  
FT misc\_feature complement(1148654..1148655)  
FT /label=NR43.16  
FT /note=NR43.16, Estimate (27), [SBW25 April 05],Plate=P04,  
Coordinates=C7, Trace=q126, [UWGC]  
FT /colour=7  
FT misc\_feature complement(1148654..1148655)  
FT /label=NR43.82  
FT /note=NR43.82, Estimate (27), [SBW25 April 05],Plate=P04,  
Coordinates=M19, Trace=q179, [UWGC]  
FT /colour=7  
FT misc\_feature 1148658..1148657  
FT /label=NR43.58  
FT /note=NR43.58, Exact (0), [SBW25 April 05],Plate=P04,  
Coordinates=I19, Trace=q177, [UWGC]  
FT /colour=7  
FT misc\_feature 1148658..1148657  
FT /label=NR43.P02  
FT /note=NR43.P02, Exact (0), [SBW25 April 05],Plate=P05,  
Coordinates=J16, Trace=q461, [UWGC]  
FT /colour=7  
FT misc\_feature 1148663..1148662  
FT /label=NR43.88  
FT /note=NR43.88, Exact (0), [SBW25 April 05],Plate=P04,  
Coordinates=O7, Trace=q132, [UWGC]

FT /colour=7  
FT misc\_feature 1148663..1148662  
FT /label=NR43.90  
FT /note=NR43.90, Exact (0), [SBW25 April 05],Plate=P04,  
Coordinates=O11, Trace=q148, [UWGC]  
FT /colour=7  
FT misc\_feature complement(1148664..1148665)  
FT /label=NR43.37  
FT /note=NR43.37, Exact (0), [SBW25 April 05],Plate=P04,  
Coordinates=G1, Trace=q104, [UWGC]  
FT /colour=7  
FT misc\_feature complement(1148664..1148665)  
FT /label=NR43.53  
FT /note=NR43.53, Exact (0), [SBW25 April 05],Plate=P04,  
Coordinates=I9, Trace=q137, [UWGC]  
FT /colour=7  
FT misc\_feature 1148674..1148673  
FT /label=NR43.18  
FT /note=NR43.18, Estimate (32), [SBW25 April 05],Plate=P04,  
Coordinates=C11, Trace=q142, [UWGC]  
FT /colour=7  
FT misc\_feature 1148680..1148679  
FT /label=NR43.52  
FT /note=NR43.52, Estimate (25), [SBW25 April 05],Plate=P04,  
Coordinates=I7, Trace=q129, [UWGC]  
FT /colour=7  
FT misc\_feature 1148680..1148679  
FT /label=NR43.94  
FT /note=NR43.94, Estimate (25), [SBW25 April 05],Plate=P04,  
Coordinates=O19, Trace=q180, [UWGC]  
FT /colour=7  
FT misc\_feature 1148686..1148685  
FT /label=NR43.19  
FT /note=NR43.19, Exact (0), [SBW25 April 05],Plate=P04,  
Coordinates=C13, Trace=q150, [UWGC]  
FT /colour=7  
FT misc\_feature 1148706..1148705  
FT /label=NR43.20  
FT /note=NR43.20, Estimate (27), [SBW25 April 05],Plate=P04,  
Coordinates=C15, Trace=q158, [UWGC]  
FT /colour=7  
FT misc\_feature 1148706..1148705  
FT /label=NR43.23  
FT /note=NR43.23, Estimate (0), [SBW25 April 05],Plate=P04,  
Coordinates=C21, Trace=q182, [UWGC]  
FT /colour=7  
FT misc\_feature complement(1148716..1148717)  
FT /label=NR43.33  
FT /note=NR43.33, Exact (0), [SBW25 April 05],Plate=P04,  
Coordinates=E17, Trace=q167, [UWGC]  
FT /colour=7  
FT misc\_feature complement(1148718..1148719)  
FT /label=NR43.35  
FT /note=NR43.35, Exact (0), [SBW25 April 05],Plate=P04,  
Coordinates=E21, Trace=q183, [UWGC]  
FT /colour=7  
FT misc\_feature complement(1148718..1148719)

FT /label=NR43.73  
FT /note=NR43.73, Exact (0), [SBW25 April 05],Plate=P04,  
Coordinates=M1, Trace=q107, [UWGC]  
FT /colour=7  
FT misc\_feature complement(1148723..1148724)  
FT /label=NR43.48  
FT /note=NR43.48, Exact (0), [SBW25 April 05],Plate=P04,  
Coordinates=G23, Trace=q192, [UWGC]  
FT /colour=7  
FT misc\_feature complement(1148743..1148744)  
FT /label=NR43.15  
FT /note=NR43.15, Estimate (26), [SBW25 April 05],Plate=P04,  
Coordinates=C5, Trace=q118, [UWGC]  
FT /colour=7  
FT misc\_feature complement(1148744..1148745)  
FT /label=NR43.42  
FT /note=NR43.42, Exact (0), [SBW25 April 05],Plate=P04,  
Coordinates=G11, Trace=q144, [UWGC]  
FT /colour=7  
FT misc\_feature complement(1148744..1148745)  
FT /label=NR43.83  
FT /note=NR43.83, Exact (0), [SBW25 April 05],Plate=P04,  
Coordinates=M21, Trace=q187, [UWGC]  
FT /colour=7  
FT misc\_feature complement(1148745..1148746)  
FT /label=NR43.77  
FT /note=NR43.77, Estimate (27), [SBW25 April 05],Plate=P04,  
Coordinates=M9, Trace=q139, [UWGC]  
FT /colour=7  
FT misc\_feature complement(1148759..1148760)  
FT /label=NR43.31  
FT /note=NR43.31, Exact (0), [SBW25 April 05],Plate=P04,  
Coordinates=E13, Trace=q151, [UWGC]  
FT /colour=7  
FT misc\_feature 1148771..1148770  
FT /label=NR43.96  
FT /note=NR43.96, Exact (0), [SBW25 April 05],Plate=P04,  
Coordinates=O23, Trace=q196, [UWGC]  
FT /colour=7  
FT misc\_feature complement(1148771..1148772)  
FT /label=NR43.13  
FT /note=NR43.13, Estimate (27), [SBW25 April 05],Plate=P04,  
Coordinates=C1, Trace=q102, [UWGC]  
FT /colour=7  
FT misc\_feature complement(1148771..1148772)  
FT /label=NR43.P09  
FT /note=NR43.P09, Estimate (101), [SBW25 April  
05],Plate=P05, Coordinates=L18, Trace=q470, [UWGC]  
FT /colour=7  
FT misc\_feature 1148773..1148772  
FT /label=NR43.75  
FT /note=NR43.75, Exact (0), [SBW25 April 05],Plate=P04,  
Coordinates=M5, Trace=q123, [UWGC]  
FT /colour=7  
FT misc\_feature 1148805..1148804  
FT /label=NR43.49

FT /note=NR43.49, Exact (0), [SBW25 April 05],Plate=P04,  
Coordinates=I1, Trace=q105, [UWGC]  
FT /colour=7  
FT misc\_feature 1148805..1148804  
FT /label=NR43.55  
FT /note=NR43.55, Exact (0), [SBW25 April 05],Plate=P04,  
Coordinates=I13, Trace=q153, [UWGC]  
FT /colour=7  
FT misc\_feature complement(1148808..1148809)  
FT /label=NR43.86  
FT /note=NR43.86, Exact (0), [SBW25 April 05],Plate=P04,  
Coordinates=O3, Trace=q116, [UWGC]  
FT /colour=7  
FT misc\_feature complement(1148815..1148816)  
FT /label=NR43.43  
FT /note=NR43.43, Exact (0), [SBW25 April 05],Plate=P04,  
Coordinates=G13, Trace=q152, [UWGC]  
FT /colour=7  
FT misc\_feature 1148820..1148819  
FT /label=NR43.63  
FT /note=NR43.63, Estimate (26), [SBW25 April 05],Plate=P04,  
Coordinates=K5, Trace=q122, [UWGC]  
FT /colour=7  
FT misc\_feature 1148821..1148820  
FT /label=NR43.91  
FT /note=NR43.91, Estimate (25), UWGC re-mapped on dapB  
deleted genome, [SBW25 April 05],Plate=P04, Coordinates=O13, Trace=q156, [UWGC]  
FT /colour=7  
FT misc\_feature complement(1148843..1148844)  
FT /label=NR43.44  
FT /note=NR43.44, Estimate (4), [SBW25 April 05],Plate=P04,  
Coordinates=G15, Trace=q160, [UWGC]  
FT /colour=7  
FT misc\_feature complement(1148843..1148844)  
FT /label=NR43.70  
FT /note=NR43.70, Estimate (4), [SBW25 April 05],Plate=P04,  
Coordinates=K19, Trace=q178, [UWGC]  
FT /colour=7  
FT misc\_feature 1148846..1148845  
FT /label=NR43.92  
FT /note=NR43.92, Exact (0), [SBW25 April 05],Plate=P04,  
Coordinates=O15, Trace=q164, [UWGC]  
FT /colour=7  
FT misc\_feature 1148848..1148847  
FT /label=NR43.45  
FT /note=NR43.45, Estimate (27), [SBW25 April 05],Plate=P04,  
Coordinates=G17, Trace=q168, [UWGC]  
FT /colour=7  
FT misc\_feature 1148848..1148847  
FT /label=NR43.68  
FT /note=NR43.68, Exact (0), [SBW25 April 05],Plate=P04,  
Coordinates=K15, Trace=q162, [UWGC]  
FT /colour=7  
FT misc\_feature 1148872..1148871  
FT /label=NR43.02  
FT /note=NR43.02, Estimate (0), [SBW25 April 05],Plate=P04,  
Coordinates=A3, Trace=q109, [UWGC]

FT /colour=7  
FT misc\_feature 1148876..1148875  
FT /label=NR43.08  
FT /note=NR43.08, Exact (0), [SBW25 April 05],Plate=P04,  
Coordinates=A15, Trace=q157, [UWGC]  
FT /colour=7  
FT misc\_feature 1148876..1148875  
FT /label=NR43.22  
FT /note=NR43.22, Exact (0), [SBW25 April 05],Plate=P04,  
Coordinates=C19, Trace=q174, [UWGC]  
FT /colour=7  
FT misc\_feature 1148878..1148877  
FT /label=NR43.29  
FT /note=NR43.29, Estimate (26), [SBW25 April 05],Plate=P04,  
Coordinates=E9, Trace=q135, [UWGC]  
FT /colour=7  
FT misc\_feature 1148881..1148880  
FT /label=NR43.11  
FT /note=NR43.11, Exact (0), [SBW25 April 05],Plate=P04,  
Coordinates=A21, Trace=q181, [UWGC]  
FT /colour=7  
FT misc\_feature 1148881..1148880  
FT /label=NR43.74  
FT /note=NR43.74, Exact (0), [SBW25 April 05],Plate=P04,  
Coordinates=M3, Trace=q115, [UWGC]  
FT /colour=7  
FT misc\_feature complement(1148887..1148888)  
FT /label=NR43.34  
FT /note=NR43.34, Exact (0), [SBW25 April 05],Plate=P04,  
Coordinates=E19, Trace=q175, [UWGC]  
FT /colour=7  
FT misc\_feature complement(1148892..1148893)  
FT /label=NR43.59  
FT /note=NR43.59, Exact (0), [SBW25 April 05],Plate=P04,  
Coordinates=I21, Trace=q185, [UWGC]  
FT /colour=7  
FT misc\_feature complement(1148892..1148893)  
FT /label=NR43.P06  
FT /note=NR43.P06, Estimate (12), [SBW25 April 05],Plate=P05,  
Coordinates=J24, Trace=q493, [UWGC]  
FT /colour=7  
FT misc\_feature complement(1148900..1148901)  
FT /label=NR43.65  
FT /note=NR43.65, Exact (0), [SBW25 April 05],Plate=P04,  
Coordinates=K9, Trace=q138, [UWGC]  
FT /colour=7  
FT misc\_feature complement(1148910..1148911)  
FT /label=NR43.24  
FT /note=NR43.24, Estimate (17), [SBW25 April 05],Plate=P04,  
Coordinates=C23, Trace=q190, [UWGC]  
FT /colour=7  
FT misc\_feature 1148917..1148916  
FT /label=NR43.26  
FT /note=NR43.26, Estimate (29), UWGC re-mapped on dapB  
deleted genome, [SBW25 April 05],Plate=P04, Coordinates=E3, Trace=q111, [UWGC]  
FT /colour=7  
FT misc\_feature complement(1148918..1148919)

FT /label=NR43.79  
 FT /note=NR43.79, Estimate (25), [SBW25 April 05],Plate=P04,  
 Coordinates=M13, Trace=q155, [UWGC]  
 FT /colour=7  
 FT misc\_feature complement(1148923..1148924)  
 FT /label=NR43.47  
 FT /note=NR43.47, Exact (0), [SBW25 April 05],Plate=P04,  
 Coordinates=G21, Trace=q184, [UWGC]  
 FT /colour=7  
 FT misc\_feature 1148924..1148923  
 FT /label=NR43.57  
 FT /note=NR43.57, Exact (0), [SBW25 April 05],Plate=P04,  
 Coordinates=I17, Trace=q169, [UWGC]  
 FT /colour=7  
 FT misc\_feature 1148945..1148944  
 FT /label=NR43.84  
 FT /note=NR43.84, Estimate (19), [SBW25 April 05],Plate=P04,  
 Coordinates=M23, Trace=q195, [UWGC]  
 FT /colour=7  
 FT misc\_feature complement(1148949..1148950)  
 FT /label=NR43.P10  
 FT /note=NR43.P10, Exact (0), [SBW25 April 05],Plate=P05,  
 Coordinates=L20, Trace=q478, [UWGC]  
 FT /colour=7  
 FT misc\_feature complement(1148955..1148956)  
 FT /label=NR43.30  
 FT /note=NR43.30, Exact (0), [SBW25 April 05],Plate=P04,  
 Coordinates=E11, Trace=q143, [UWGC]  
 FT /colour=7  
 FT misc\_feature 1148960..1148959  
 FT /label=NR43.64  
 FT /note=NR43.64, Estimate (28), UWGC re-mapped on dapB  
 deleted genome, [SBW25 April 05],Plate=P04, Coordinates=K7, Trace=q130, [UWGC]  
 FT /colour=7  
 FT misc\_feature 1148962..1148961  
 FT /label=NR43.87  
 FT /note=NR43.87, Estimate (26), UWGC re-mapped on dapB  
 deleted genome, [SBW25 April 05],Plate=P04, Coordinates=O5, Trace=q124, [UWGC]  
 FT /colour=7  
 FT misc\_feature 1148969..1148968  
 FT /label=NR43.89  
 FT /note=NR43.89, Exact (0), [SBW25 April 05],Plate=P04,  
 Coordinates=O9, Trace=q140, [UWGC]  
 FT /colour=7  
 FT misc\_feature complement(1148975..1148976)  
 FT /label=NR43.28  
 FT /note=NR43.28, Exact (0), [SBW25 April 05],Plate=P04,  
 Coordinates=E7, Trace=q127, [UWGC]  
 FT /colour=7  
 FT misc\_feature 1148976..1148975  
 FT /label=NR43.85  
 FT /note=NR43.85, Exact (0), [SBW25 April 05],Plate=P04,  
 Coordinates=O1, Trace=q108, [UWGC]  
 FT /colour=7  
 FT misc\_feature complement(1148986..1148987)  
 FT /label=NR43.07

FT /note=NR43.07, Estimate (4), [SBW25 April 05],Plate=P04,  
 Coordinates=A13, Trace=q149, [UWGC]  
 FT /colour=7  
 FT misc\_feature 1148989..1148988  
 FT /label=NR43.27  
 FT /note=NR43.27, Exact (0), [SBW25 April 05],Plate=P04,  
 Coordinates=E5, Trace=q119, [UWGC]  
 FT /colour=7  
 FT misc\_feature 1148989..1148988  
 FT /label=NR43.32  
 FT /note=NR43.32, Exact (0), [SBW25 April 05],Plate=P04,  
 Coordinates=E15, Trace=q159, [UWGC]  
 FT /colour=7  
 FT misc\_feature 1148990..1148989  
 FT /label=NR43.72  
 FT /note=NR43.72, Estimate (11), [SBW25 April 05],Plate=P04,  
 Coordinates=K23, Trace=q194, [UWGC]  
 FT /colour=7  
 FT misc\_feature 1148994..1148993  
 FT /label=NR43.51  
 FT /note=NR43.51, Estimate (23), UWGC re-mapped on dapB  
 deleted genome, [SBW25 April 05],Plate=P04, Coordinates=I5, Trace=q121, [UWGC]  
 FT /colour=7  
 FT misc\_feature complement(1149000..1149001)  
 FT /label=NR43.17  
 FT /note=NR43.17, Exact (0), [SBW25 April 05],Plate=P04,  
 Coordinates=C9, Trace=q134, [UWGC]  
 FT /colour=7  
 FT misc\_feature complement(1149000..1149001)  
 FT /label=NR43.38  
 FT /note=NR43.38, Exact (0), [SBW25 April 05],Plate=P04,  
 Coordinates=G3, Trace=q112, [UWGC]  
 FT /colour=7  
 FT misc\_feature complement(1149000..1149001)  
 FT /label=NR43.50  
 FT /note=NR43.50, Exact (0), [SBW25 April 05],Plate=P04,  
 Coordinates=I3, Trace=q113, [UWGC]  
 FT /colour=7  
 FT misc\_feature complement(1149000..1149001)  
 FT /label=NR43.62  
 FT /note=NR43.62, Exact (0), [SBW25 April 05],Plate=P04,  
 Coordinates=K3, Trace=q114, [UWGC]  
 FT /colour=7  
 FT misc\_feature complement(1149000..1149001)  
 FT /label=NR43.81  
 FT /note=NR43.81, Exact (0), [SBW25 April 05],Plate=P04,  
 Coordinates=M17, Trace=q171, [UWGC]  
 FT /colour=7  
 FT misc\_feature complement(1149000..1149001)  
 FT /label=NR43.93  
 FT /note=NR43.93, Exact (0), [SBW25 April 05],Plate=P04,  
 Coordinates=O17, Trace=q172, [UWGC]  
 FT /colour=7  
 FT misc\_feature 1149010..1149009  
 FT /label=NR43.14  
 FT /note=NR43.14, Estimate (35), [SBW25 April 05],Plate=P04,  
 Coordinates=C3, Trace=q110, [UWGC]

FT /colour=7  
 FT misc\_feature complement(1149013..1149014)  
 FT /label=NR43.60  
 FT /note=NR43.60, Estimate (31), [SBW25 April 05],Plate=P04,  
 Coordinates=I23, Trace=q193, [UWGC]  
 FT /colour=7  
 FT misc\_feature 1149014..1149013  
 FT /label=NR43.41  
 FT /note=NR43.41, Exact (0), [SBW25 April 05],Plate=P04,  
 Coordinates=G9, Trace=q136, [UWGC]  
 FT /colour=7  
 FT misc\_feature complement(1149025..1149026)  
 FT /label=NR43.67  
 FT /note=NR43.67, Exact (0), [SBW25 April 05],Plate=P04,  
 Coordinates=K13, Trace=q154, [UWGC]  
 FT /colour=7  
 FT misc\_feature complement(1149026..1149027)  
 FT /label=NR43.01  
 FT /note=NR43.01, Estimate (26), [SBW25 April 05],Plate=P04,  
 Coordinates=A1, Trace=q101, [UWGC]  
 FT /colour=7  
 FT misc\_feature complement(1149027..1149028)  
 FT /label=NR43.25  
 FT /note=NR43.25, Exact (0), [SBW25 April 05],Plate=P04,  
 Coordinates=E1, Trace=q103, [UWGC]  
 FT /colour=7  
 FT misc\_feature complement(1149032..1149033)  
 FT /label=NR43.03  
 FT /note=NR43.03, Exact (0), [SBW25 April 05],Plate=P04,  
 Coordinates=A5, Trace=q117, [UWGC]  
 FT /colour=7  
 FT misc\_feature complement(1149050..1149051)  
 FT /label=NR43.04  
 FT /note=NR43.04, Exact (0), [SBW25 April 05],Plate=P04,  
 Coordinates=A7, Trace=q125, [UWGC]  
 FT /colour=7  
 FT misc\_feature complement(1149050..1149051)  
 FT /label=NR43.95  
 FT /note=NR43.95, Exact (0), [SBW25 April 05],Plate=P04,  
 Coordinates=O21, Trace=q188, [UWGC]  
 FT /colour=7  
 FT misc\_feature 1149068..1149067  
 FT /label=NR43.40  
 FT /note=NR43.40, Estimate (29), UWGC re-mapped on dapB  
 deleted genome, [SBW25 April 05],Plate=P04, Coordinates=G7, Trace=q128, [UWGC]  
 FT /colour=7  
 FT misc\_feature 1149099..1149098  
 FT /label=NR43.12  
 FT /note=NR43.12, Exact (0), UWGC re-mapped on dapB deleted  
 genome, [SBW25 April 05],Plate=P04, Coordinates=A23, Trace=q189, [UWGC]  
 FT /colour=7  
 FT misc\_feature 1149099..1149098  
 FT /label=NR43.69  
 FT /note=NR43.69, Exact (0), UWGC re-mapped on dapB deleted  
 genome, [SBW25 April 05],Plate=P04, Coordinates=K17, Trace=q170, [UWGC]  
 FT /colour=7  
 FT misc\_feature complement(1149103..1149104)



FT /label=NR43.36  
 FT /note=NR43.36, Exact (0), [SBW25 April 05],Plate=P04,  
 Coordinates=E23, Trace=q191, [UWGC]  
 FT /colour=7  
 FT misc\_feature complement(1149103..1149104)  
 FT /label=NR43.61  
 FT /note=NR43.61, Exact (0), [SBW25 April 05],Plate=P04,  
 Coordinates=K1, Trace=q106, [UWGC]  
 FT /colour=7  
 FT misc\_feature complement(1149148..1149149)  
 FT /label=NR43.06  
 FT /note=NR43.06, Exact (manual correction), [SBW25 April  
 05],Plate=P04, Coordinates=A11, Trace=q141, [UWGC]  
 FT /colour=7  
 FT misc\_feature 1149164..1149165  
 FT /label=NR43.09  
 FT /note=NR43.09,MCS hit =  
 ^GATCTGCAGGTCGAGCGCTTAATTAAGTTCGAGTTGGGTATG, [SBW25 April 05],Plate=P04,  
 Coordinates=A17, Trace=q165, [UWGC]  
 FT /colour=7  
 FT misc\_feature 1149164..1149165  
 FT /label=NR43.M5.01  
 FT /note=NR43.M5.01,MCS hit  
 =GATCTGCAGGTCGAGCGCT^TAATTAAGTTCGAGTTGGGTATG, [SBW25 April 05],Plate=PM5.2,  
 Coordinates=B9, Trace=C609, [Oxford]  
 FT /colour=10  
 FT misc\_feature 1186163..1186162  
 FT /label=NR12.69  
 FT /note=NR12.69, Exact (0), [SBW25 April 05],Plate=P01,  
 Coordinates=K18, Trace=q270, [UWGC]  
 FT /colour=7  
 FT misc\_feature complement(1189910..1189911)  
 FT /label=NR36.M5.02  
 FT /note=NR36.M5.02,MCS hit  
 =GATCTGCAGGTCGAGCGCT^TAATTAAGTTCGAGTTGGGTATG, [SBW25 April 05],Plate=PM5.1,  
 Coordinates=H5, Trace=C486, [Oxford]  
 FT /colour=10  
 FT misc\_feature complement(1189913..1189914)  
 FT /label=NR36.02  
 FT /note=NR36.02, Exact (manual correction), [SBW25 April  
 05],Plate=, Coordinates=, Trace=NR36\_02, [Oxford]  
 FT /colour=7  
 FT misc\_feature complement(1189919..1189920)  
 FT /label=NR36.01  
 FT /note=NR36.01, Exact (manual correction), [SBW25 April  
 05],Plate=, Coordinates=, Trace=NR36\_01, [Oxford]  
 FT /colour=7  
 FT misc\_feature complement(1189919..1189920)  
 FT /label=NR36.M5.01  
 FT /note=NR36.M5.01, Exact (0), [SBW25 April 05],Plate=PM5.1,  
 Coordinates=H4, Trace=C478, [Oxford]  
 FT /colour=10  
 FT misc\_feature complement(1226302..1226303)  
 FT /label=NR33.95  
 FT /note=NR33.95, Exact (0), [SBW25 April 05],Plate=P02,  
 Coordinates=P21, Trace=q388, [UWGC]  
 FT /colour=7

FT misc\_feature complement(1241662..1241663  
FT /label=NR51.47  
FT /note=NR51.47,MCS hit =  
^GATCTGCAGGTCGAGCGCTTAATTAAGTTCGAGTTGGGTATG, [SBW25 April 05],Plate=P07,  
Coordinates=P20, Trace=q480, [UWGC]  
FT /colour=7  
FT misc\_feature 1241662..1241663  
FT /label=NR51.58  
FT /note=NR51.58, Exact (manual correction), [SBW25 April  
05],Plate=P07, Coordinates=K21, Trace=q186, [UWGC]  
FT /colour=7  
FT misc\_feature 1241662..1241663  
FT /label=NR51.22  
FT /note=NR51.22, Exact (manual correction), [SBW25 April  
05],Plate=P07, Coordinates=G19, Trace=q176, [UWGC]  
FT /colour=7  
FT misc\_feature 1241662..1241663  
FT /label=NR51.36  
FT /note=NR51.36, Exact (manual correction), [SBW25 April  
05],Plate=P07, Coordinates=E20, Trace=q275, [UWGC]  
FT /colour=7  
FT misc\_feature 1241662..1241663  
FT /label=NR51.32  
FT /note=NR51.32, Exact (manual correction), [SBW25 April  
05],Plate=P07, Coordinates=A20, Trace=q273, [UWGC]  
FT /colour=7  
FT misc\_feature 1241662..1241663  
FT /label=NR51.71  
FT /note=NR51.71, Exact (manual correction), [SBW25 April  
05],Plate=P07, Coordinates=H22, Trace=q484, [UWGC]  
FT /colour=7  
FT misc\_feature 1241662..1241663  
FT /label=NR51.48  
FT /note=NR51.48, Exact (manual correction), [SBW25 April  
05],Plate=P07, Coordinates=A21, Trace=q181, [UWGC]  
FT /colour=7  
FT misc\_feature 1241662..1241663  
FT /label=NR51.51  
FT /note=NR51.51, Exact (0), [SBW25 April 05],Plate=P07,  
Coordinates=D21, Trace=q382, [UWGC]  
FT /colour=7  
FT misc\_feature 1241671..1241672  
FT /label=NR51.05  
FT /note=NR51.05, Exact (manual correction), [SBW25 April  
05],Plate=P07, Coordinates=F18, Trace=q467, [UWGC]  
FT /colour=7  
FT misc\_feature 1241671..1241672  
FT /label=NR51.68  
FT /note=NR51.68, Exact (manual correction), [SBW25 April  
05],Plate=P07, Coordinates=E22, Trace=q283, [UWGC]  
FT /colour=7  
FT misc\_feature 1241671..1241672  
FT /label=NR51.02  
FT /note=NR51.02, Exact (manual correction), [SBW25 April  
05],Plate=P07, Coordinates=C18, Trace=q266, [UWGC]  
FT /colour=7  
FT misc\_feature 1241671..1241672

FT /label=NR51.07  
 FT /note=NR51.07, Exact (manual correction), [SBW25 April  
 05],Plate=P07, Coordinates=H18, Trace=q468, [UWGC]  
 FT /colour=7  
 FT misc\_feature 1241671..1241672  
 FT /label=NR51.10  
 FT /note=NR51.10, Exact (manual correction), [SBW25 April  
 05],Plate=P07, Coordinates=K18, Trace=q270, [UWGC]  
 FT /colour=7  
 FT misc\_feature 1241671..1241672  
 FT /label=NR51.13  
 FT /note=NR51.13, Exact (manual correction), [SBW25 April  
 05],Plate=P07, Coordinates=N18, Trace=q471, [UWGC]  
 FT /colour=7  
 FT misc\_feature 1241671..1241672  
 FT /label=NR51.14  
 FT /note=NR51.14, Exact (manual correction), [SBW25 April  
 05],Plate=P07, Coordinates=O18, Trace=q272, [UWGC]  
 FT /colour=7  
 FT misc\_feature 1241671..1241672  
 FT /label=NR51.16  
 FT /note=NR51.16, Exact (manual correction), [SBW25 April  
 05],Plate=P07, Coordinates=A19, Trace=q173, [UWGC]  
 FT /colour=7  
 FT misc\_feature 1241671..1241672  
 FT /label=NR51.49  
 FT /note=NR51.49, Exact (manual correction), [SBW25 April  
 05],Plate=P07, Coordinates=B21, Trace=q381, [UWGC]  
 FT /colour=7  
 FT misc\_feature 1241671..1241672  
 FT /label=NR51.56  
 FT /note=NR51.56, Exact (manual correction), [SBW25 April  
 05],Plate=P07, Coordinates=I21, Trace=q185, [UWGC]  
 FT /colour=7  
 FT misc\_feature 1241671..1241672  
 FT /label=NR51.57  
 FT /note=NR51.57, Exact (manual correction), [SBW25 April  
 05],Plate=P07, Coordinates=J21, Trace=q385, [UWGC]  
 FT /colour=7  
 FT misc\_feature 1241671..1241672  
 FT /label=NR51.61  
 FT /note=NR51.61, Exact (manual correction), [SBW25 April  
 05],Plate=P07, Coordinates=N21, Trace=q387, [UWGC]  
 FT /colour=7  
 FT misc\_feature 1241671..1241672  
 FT /label=NR51.65  
 FT /note=NR51.65, Exact (manual correction), [SBW25 April  
 05],Plate=P07, Coordinates=B22, Trace=q481, [UWGC]  
 FT /colour=7  
 FT misc\_feature 1241671..1241672  
 FT /label=NR51.41  
 FT /note=NR51.41, Exact (manual correction), [SBW25 April  
 05],Plate=P07, Coordinates=J20, Trace=q477, [UWGC]  
 FT /colour=7  
 FT misc\_feature 1241676..1241677  
 FT /label=NR51.46

FT /note=NR51.46, Exact (manual correction), [SBW25 April  
05],Plate=P07, Coordinates=O20, Trace=q280, [UWGC]  
FT /colour=7  
FT misc\_feature 1241676..1241677  
FT /label=NR51.45  
FT /note=NR51.45, Exact (manual correction), [SBW25 April  
05],Plate=P07, Coordinates=N20, Trace=q479, [UWGC]  
FT /colour=7  
FT misc\_feature complement(1241703..1241704)  
FT /label=NR51.60  
FT /note=NR51.60, Estimate (4), [SBW25 April 05],Plate=P07,  
Coordinates=M21, Trace=q187, [UWGC]  
FT /colour=7  
FT misc\_feature complement(1241706..1241707)  
FT /label=NR51.73  
FT /note=NR51.73, Estimate (7), [SBW25 April 05],Plate=P07,  
Coordinates=J22, Trace=q485, [UWGC]  
FT /colour=7  
FT misc\_feature 1241709..1241710  
FT /label=NR51.76  
FT /note=NR51.76, Exact (manual correction), [SBW25 April  
05],Plate=P07, Coordinates=M22, Trace=q287, [UWGC]  
FT /colour=7  
FT misc\_feature complement(1241736..1241737)  
FT /label=NR51.21  
FT /note=NR51.21, Estimate (1), [SBW25 April 05],Plate=P07,  
Coordinates=F19, Trace=q375, [UWGC]  
FT /colour=7  
FT misc\_feature complement(1241744..1241745)  
FT /label=NR51.53  
FT /note=NR51.53, Estimate (9), [SBW25 April 05],Plate=P07,  
Coordinates=F21, Trace=q383, [UWGC]  
FT /colour=7  
FT misc\_feature complement(1241745..1241746)  
FT /label=NR51.01  
FT /note=NR51.01, Estimate (10), [SBW25 April 05],Plate=P07,  
Coordinates=B18, Trace=q465, [UWGC]  
FT /colour=7  
FT misc\_feature complement(1241745..1241746)  
FT /label=NR51.06  
FT /note=NR51.06, Estimate (10), [SBW25 April 05],Plate=P07,  
Coordinates=G18, Trace=q268, [UWGC]  
FT /colour=7  
FT misc\_feature complement(1241745..1241746)  
FT /label=NR51.08  
FT /note=NR51.08, Estimate (4), [SBW25 April 05],Plate=P07,  
Coordinates=I18, Trace=q269, [UWGC]  
FT /colour=7  
FT misc\_feature complement(1241745..1241746)  
FT /label=NR51.12  
FT /note=NR51.12, Estimate (10), [SBW25 April 05],Plate=P07,  
Coordinates=M18, Trace=q271, [UWGC]  
FT /colour=7  
FT misc\_feature complement(1241745..1241746)  
FT /label=NR51.17  
FT /note=NR51.17, Estimate (10), [SBW25 April 05],Plate=P07,  
Coordinates=B19, Trace=q373, [UWGC]

FT /colour=7  
FT misc\_feature complement(1241745..1241746)  
FT /label=NR51.31  
FT /note=NR51.31, Estimate (10), [SBW25 April 05],Plate=P07,  
Coordinates=P19, Trace=q380, [UWGC]  
FT /colour=7  
FT misc\_feature complement(1241745..1241746)  
FT /label=NR51.67  
FT /note=NR51.67, Estimate (4), [SBW25 April 05],Plate=P07,  
Coordinates=D22, Trace=q482, [UWGC]  
FT /colour=7  
FT misc\_feature complement(1241745..1241746)  
FT /label=NR51.70  
FT /note=NR51.70, Estimate (10), [SBW25 April 05],Plate=P07,  
Coordinates=G22, Trace=q284, [UWGC]  
FT /colour=7  
FT misc\_feature complement(1241746..1241747)  
FT /label=NR51.04  
FT /note=NR51.04, Estimate (9), [SBW25 April 05],Plate=P07,  
Coordinates=E18, Trace=q267, [UWGC]  
FT /colour=7  
FT misc\_feature complement(1241746..1241747)  
FT /label=NR51.24  
FT /note=NR51.24, Estimate (13), [SBW25 April 05],Plate=P07,  
Coordinates=I19, Trace=q177, [UWGC]  
FT /colour=7  
FT misc\_feature complement(1241746..1241747)  
FT /label=NR51.74  
FT /note=NR51.74, Estimate (9), [SBW25 April 05],Plate=P07,  
Coordinates=K22, Trace=q286, [UWGC]  
FT /colour=7  
FT misc\_feature complement(1241748..1241749)  
FT /label=NR51.66  
FT /note=NR51.66, Exact (0), [SBW25 April 05],Plate=P07,  
Coordinates=C22, Trace=q282, [UWGC]  
FT /colour=7  
FT misc\_feature complement(1241753..1241754)  
FT /label=NR51.63  
FT /note=NR51.63, Exact (0), [SBW25 April 05],Plate=P07,  
Coordinates=P21, Trace=q388, [UWGC]  
FT /colour=7  
FT misc\_feature complement(1241762..1241763)  
FT /label=NR51.40  
FT /note=NR51.40, Estimate (1), [SBW25 April 05],Plate=P07,  
Coordinates=I20, Trace=q277, [UWGC]  
FT /colour=7  
FT misc\_feature complement(1241772..1241773)  
FT /label=NR51.42  
FT /note=NR51.42, Estimate (32), [SBW25 April 05],Plate=P07,  
Coordinates=K20, Trace=q278, [UWGC]  
FT /colour=7  
FT misc\_feature complement(1241777..1241778)  
FT /label=NR51.62  
FT /note=NR51.62, Estimate (42), [SBW25 April 05],Plate=P07,  
Coordinates=O21, Trace=q188, [UWGC]  
FT /colour=7  
FT misc\_feature complement(1241780..1241781)

FT /label=NR51.50  
FT /note=NR51.50, Estimate (36), [SBW25 April 05],Plate=P07,  
Coordinates=C21, Trace=q182, [UWGC]  
FT /colour=7  
FT misc\_feature 1242939..1242938  
FT /label=NR51.52  
FT /note=NR51.52, Estimate (28), [SBW25 April 05],Plate=P07,  
Coordinates=E21, Trace=q183, [UWGC]  
FT /colour=7  
FT misc\_feature 1242943..1242942  
FT /label=NR51.11  
FT /note=NR51.11, Estimate (44), [SBW25 April 05],Plate=P07,  
Coordinates=L18, Trace=q470, [UWGC]  
FT /colour=7  
FT misc\_feature 1242954..1242953  
FT /label=NR51.59  
FT /note=NR51.59, Estimate (48), [SBW25 April 05],Plate=P07,  
Coordinates=L21, Trace=q386, [UWGC]  
FT /colour=7  
FT misc\_feature 1242955..1242954  
FT /label=NR51.55  
FT /note=NR51.55, Estimate (45), [SBW25 April 05],Plate=P07,  
Coordinates=H21, Trace=q384, [UWGC]  
FT /colour=7  
FT misc\_feature 1242957..1242956  
FT /label=NR51.54  
FT /note=NR51.54, Estimate (33), [SBW25 April 05],Plate=P07,  
Coordinates=G21, Trace=q184, [UWGC]  
FT /colour=7  
FT misc\_feature 1242991..1242990  
FT /label=NR51.75  
FT /note=NR51.75, Estimate (13), [SBW25 April 05],Plate=P07,  
Coordinates=L22, Trace=q486, [UWGC]  
FT /colour=7  
FT misc\_feature 1242995..1242994  
FT /label=NR51.26  
FT /note=NR51.26, Estimate (11), [SBW25 April 05],Plate=P07,  
Coordinates=K19, Trace=q178, [UWGC]  
FT /colour=7  
FT misc\_feature complement(1242996..1242997)  
FT /label=NR51.25  
FT /note=NR51.25, Exact (0), [SBW25 April 05],Plate=P07,  
Coordinates=J19, Trace=q377, [UWGC]  
FT /colour=7  
FT misc\_feature complement(1242996..1242997)  
FT /label=NR51.69  
FT /note=NR51.69, Exact (0), [SBW25 April 05],Plate=P07,  
Coordinates=F22, Trace=q483, [UWGC]  
FT /colour=7  
FT misc\_feature 1242998..1242997  
FT /label=NR51.39  
FT /note=NR51.39, Exact (0), [SBW25 April 05],Plate=P07,  
Coordinates=H20, Trace=q476, [UWGC]  
FT /colour=7  
FT misc\_feature 1243002..1243001  
FT /label=NR51.03

FT /note=NR51.03, Estimate (34), [SBW25 April 05],Plate=P07,  
 Coordinates=D18, Trace=q466, [UWGC]  
 FT /colour=7  
 FT misc\_feature 1243016..1243015  
 FT /label=NR51.23  
 FT /note=NR51.23, Estimate (37), [SBW25 April 05],Plate=P07,  
 Coordinates=H19, Trace=q376, [UWGC]  
 FT /colour=7  
 FT misc\_feature 1243025..1243024  
 FT /label=NR51.38  
 FT /note=NR51.38, Estimate (1), [SBW25 April 05],Plate=P07,  
 Coordinates=G20, Trace=q276, [UWGC]  
 FT /colour=7  
 FT misc\_feature 1243041..1243040  
 FT /label=NR51.43  
 FT /note=NR51.43, Exact (0), [SBW25 April 05],Plate=P07,  
 Coordinates=L20, Trace=q478, [UWGC]  
 FT /colour=7  
 FT misc\_feature 1243051..1243050  
 FT /label=NR51.37  
 FT /note=NR51.37, Exact (0), [SBW25 April 05],Plate=P07,  
 Coordinates=F20, Trace=q475, [UWGC]  
 FT /colour=7  
 FT misc\_feature 1243056..1243055  
 FT /label=NR51.72  
 FT /note=NR51.72, Estimate (120), [SBW25 April 05],Plate=P07,  
 Coordinates=I22, Trace=q285, [UWGC]  
 FT /colour=7  
 FT misc\_feature 1243063..1243062  
 FT /label=NR51.20  
 FT /note=NR51.20, Estimate (3), [SBW25 April 05],Plate=P07,  
 Coordinates=E19, Trace=q175, [UWGC]  
 FT /colour=7  
 FT misc\_feature 1243148..1243149  
 FT /label=NR51.28  
 FT /note=NR51.28, Exact (manual correction), [SBW25 April  
 05],Plate=P07, Coordinates=M19, Trace=q179, [UWGC]  
 FT /colour=7  
 FT misc\_feature complement(1244899..1244900)  
 FT /label=NR51.M5.02  
 FT /note=NR51.M5.02, Exact (0), [SBW25 April 05],Plate=PM5.2,  
 Coordinates=C8, Trace=C602, [Oxford]  
 FT /colour=10  
 FT misc\_feature complement(1251823..1251824)  
 FT /label=NR32.P01  
 FT /note=NR32.P01, Exact (manual correction), [SBW25 April  
 05],Plate=P05, Coordinates=N14, Trace=q455, [UWGC]  
 FT /colour=7  
 FT misc\_feature complement(1251823..1251824)  
 FT /label=NR32.50  
 FT /note=NR32.50,MCS hit  
 =GATCTGCAGGTCGAGCGCTTAATT^AACTAGTCGAGTTGGGTATG, [SBW25 April 05],Plate=P02,  
 Coordinates=I4, Trace=q213, [UWGC]  
 FT /colour=7  
 FT misc\_feature complement(1251823..1251824)  
 FT /label=NR32.P07

FT /note=NR32.P07, Exact (manual correction), [SBW25 April 05],Plate=P05, Coordinates=P14, Trace=q456, [UWGC]  
 FT /colour=7  
 FT misc\_feature complement(1251823..1251824)  
 FT /label=NR32.74  
 FT /note=NR32.74,MCS hit =  
 =GATCTGCAGGTCGAGCGCT^TAATTAAGTAGTCGAGTTGGGTATG, [SBW25 April 05],Plate=P02, Coordinates=M4, Trace=q215, [UWGC]  
 FT /colour=7  
 FT misc\_feature 1251824..1251823  
 FT /label=NR32.49  
 FT /note=NR32.49,MCS hit =  
 GATCTGCAG^GTCGAGCGCTTAATTAAGTAGTGAGTTGGGTATG, [SBW25 April 05],Plate=P02, Coordinates=I2, Trace=q205, [UWGC]  
 FT /colour=7  
 FT misc\_feature 1251824..1251823  
 FT /label=NR32.72  
 FT /note=NR32.72,MCS hit =  
 GATCTGCAGGTCGAGCGCTTAATTAAGTAGTGAGTTGGGTATG, [SBW25 April 05],Plate=P02, Coordinates=K24, Trace=q294, [UWGC]  
 FT /colour=7  
 FT misc\_feature 1251824..1251823  
 FT /label=NR32.18  
 FT /note=NR32.18,MCS hit =  
 GATCTGCAGGTCGAGCGCTTAATTAAGTAGTGAGTTGGGTATG, [SBW25 April 05],Plate=P02, Coordinates=C12, Trace=q242, [UWGC]  
 FT /colour=7  
 FT misc\_feature 1251824..1251823  
 FT /label=NR32.38  
 FT /note=NR32.38, Estimate (27), [SBW25 April 05],Plate=P02, Coordinates=G4, Trace=q212, [UWGC]  
 FT /colour=7  
 FT misc\_feature complement(1251824..1251823)  
 FT /label=NR32.03  
 FT /note=NR32.03,MCS hit =  
 GATCTGCAGGTCGAGCGCT^TAATTAAGTAGTCGAGTTGGGTATG, [SBW25 April 05],Plate=P02, Coordinates=A6, Trace=q217, [UWGC]  
 FT /colour=7  
 FT misc\_feature complement(1251824..1251823)  
 FT /label=NR32.12  
 FT /note=NR32.12,MCS hit =  
 ^GATCTGCAGGTCGAGCGCTTAATTAAGTAGTCGAGTTGGGTATG, [SBW25 April 05],Plate=P02, Coordinates=A24, Trace=q289, [UWGC]  
 FT /colour=7  
 FT misc\_feature complement(1251824..1251823)  
 FT /label=NR32.17  
 FT /note=NR32.17,MCS hit =  
 GATCTGCAGGTCGAGCGCT^TAATTAAGTAGTCGAGTTGGGTATG, [SBW25 April 05],Plate=P02, Coordinates=C10, Trace=q234, [UWGC]  
 FT /colour=7  
 FT misc\_feature complement(1251824..1251823)  
 FT /label=NR32.46  
 FT /note=NR32.46,MCS =  
 GATCTGCAGGTCGAGCGCTTAATTAAGTAGTC^GAGTTGGGTATG, [SBW25 April 05],Plate=P02, Coordinates=G20, Trace=q276, [UWGC]  
 FT /colour=7  
 FT misc\_feature 1251825..1251826



FT /label=NR32.71  
FT /note=NR32.71, Exact (manual correction), [SBW25 April  
05],Plate=P02, Coordinates=K22, Trace=q286, [UWGC]  
FT /colour=7  
FT misc\_feature 1251826..1251825  
FT /label=NR32.41  
FT /note=NR32.41, Estimate (26), [SBW25 April 05],Plate=P02,  
Coordinates=G10, Trace=q236, [UWGC]  
FT /colour=7  
FT misc\_feature 1251828..1251827  
FT /label=NR32.64  
FT /note=NR32.64, Exact (manual correction), [SBW25 April  
05],Plate=P02, Coordinates=K8, Trace=q230, [UWGC]  
FT /colour=7  
FT misc\_feature 1251829..1251830  
FT /label=NR32.66  
FT /note=NR32.66, Exact (manual correction), [SBW25 April  
05],Plate=P02, Coordinates=K12, Trace=q246, [UWGC]  
FT /colour=7  
FT misc\_feature 1251829..1251828  
FT /label=NR32.01  
FT /note=NR32.01, Exact (0), [SBW25 April 05],Plate=P02,  
Coordinates=A2, Trace=q201, [UWGC]  
FT /colour=7  
FT misc\_feature 1251829..1251828  
FT /label=NR32.06  
FT /note=NR32.06, Exact (0), [SBW25 April 05],Plate=P02,  
Coordinates=A12, Trace=q241, [UWGC]  
FT /colour=7  
FT misc\_feature 1251829..1251828  
FT /label=NR32.44  
FT /note=NR32.44, Exact (0), [SBW25 April 05],Plate=P02,  
Coordinates=G16, Trace=q260, [UWGC]  
FT /colour=7  
FT misc\_feature 1251829..1251828  
FT /label=NR32.45  
FT /note=NR32.45, Estimate (32), [SBW25 April 05],Plate=P02,  
Coordinates=G18, Trace=q268, [UWGC]  
FT /colour=7  
FT misc\_feature 1251829..1251828  
FT /label=NR32.57  
FT /note=NR32.57, Exact (0), [SBW25 April 05],Plate=P02,  
Coordinates=I18, Trace=q269, [UWGC]  
FT /colour=7  
FT misc\_feature 1251829..1251828  
FT /label=NR32.58  
FT /note=NR32.58, Exact (0), [SBW25 April 05],Plate=P02,  
Coordinates=I20, Trace=q277, [UWGC]  
FT /colour=7  
FT misc\_feature 1251830..1251829  
FT /label=NR32.14  
FT /note=NR32.14, Exact (manual correction), [SBW25 April  
05],Plate=P02, Coordinates=C4, Trace=q210, [UWGC]  
FT /colour=7  
FT misc\_feature 1251830..1251829  
FT /label=NR32.78

FT /note=NR32.78, Estimate (31), [SBW25 April 05],Plate=P02,  
 Coordinates=M12, Trace=q247, [UWGC]  
 FT /colour=7  
 FT misc\_feature complement(1251833..1251834)  
 FT /label=NR32.P10  
 FT /note=NR32.P10, Exact (manual correction), [SBW25 April  
 05],Plate=P05, Coordinates=P20, Trace=q480, [UWGC]  
 FT /colour=7  
 FT misc\_feature 1251834..1251833  
 FT /label=NR32.16  
 FT /note=NR32.16, Exact (manual correction), [SBW25 April  
 05],Plate=P02, Coordinates=C8, Trace=q226, [UWGC]  
 FT /colour=7  
 FT misc\_feature 1251837..1251838  
 FT /label=NR32.51  
 FT /note=NR32.51, Exact (manual correction), [SBW25 April  
 05],Plate=P02, Coordinates=I6, Trace=q221, [UWGC]  
 FT /colour=7  
 FT misc\_feature complement(1251839..1251840)  
 FT /label=NR32.63  
 FT /note=NR32.63, Exact (manual correction), [SBW25 April  
 05],Plate=P02, Coordinates=K6, Trace=q222, [UWGC]  
 FT /colour=7  
 FT misc\_feature complement(1251839..1251840)  
 FT /label=NR32.76  
 FT /note=NR32.76, Exact (manual correction), [SBW25 April  
 05],Plate=P02, Coordinates=M8, Trace=q231, [UWGC]  
 FT /colour=7  
 FT misc\_feature complement(1251839..1251840)  
 FT /label=NR32.75  
 FT /note=NR32.75, Exact (manual correction), [SBW25 April  
 05],Plate=P02, Coordinates=M6, Trace=q223, [UWGC]  
 FT /colour=7  
 FT misc\_feature 1251840..1251841  
 FT /label=NR32.53  
 FT /note=NR32.53, Exact (manual correction), [SBW25 April  
 05],Plate=P02, Coordinates=I10, Trace=q237, [UWGC]  
 FT /colour=7  
 FT misc\_feature complement(1251840..1251841)  
 FT /label=NR32.05  
 FT /note=NR32.05, Exact (manual correction), [SBW25 April  
 05],Plate=P02, Coordinates=A10, Trace=q233, [UWGC]  
 FT /colour=7  
 FT misc\_feature complement(1251840..1251841)  
 FT /label=NR32.08  
 FT /note=NR32.08, Exact (manual correction), [SBW25 April  
 05],Plate=P02, Coordinates=A16, Trace=q257, [UWGC]  
 FT /colour=7  
 FT misc\_feature complement(1251840..1251841)  
 FT /label=NR32.13  
 FT /note=NR32.13, Exact (manual correction), [SBW25 April  
 05],Plate=P02, Coordinates=C2, Trace=q202, [UWGC]  
 FT /colour=7  
 FT misc\_feature complement(1251840..1251841)  
 FT /label=NR32.23  
 FT /note=NR32.23, Exact (manual correction), [SBW25 April  
 05],Plate=P02, Coordinates=C22, Trace=q282, [UWGC]

FT /colour=7  
FT misc\_feature complement(1251840..1251841)  
FT /label=NR32.25  
FT /note=NR32.25, Exact (manual correction), [SBW25 April  
05],Plate=P02, Coordinates=E2, Trace=q203, [UWGC]  
FT /colour=7  
FT misc\_feature complement(1251840..1251841)  
FT /label=NR32.42  
FT /note=NR32.42, Exact (manual correction), [SBW25 April  
05],Plate=P02, Coordinates=G12, Trace=q244, [UWGC]  
FT /colour=7  
FT misc\_feature complement(1251840..1251841)  
FT /label=NR32.M5.01  
FT /note=NR32.M5.01, Exact (0), [SBW25 April 05],Plate=PM5.1,  
Coordinates=G1, Trace=C442, [Oxford]  
FT /colour=10  
FT misc\_feature 1251846..1251845  
FT /label=NR32.26  
FT /note=NR32.26, Exact (manual correction), [SBW25 April  
05],Plate=P02, Coordinates=E4, Trace=q211, [UWGC]  
FT /colour=7  
FT misc\_feature 1251848..1251847  
FT /label=NR32.30  
FT /note=NR32.30, Exact (manual correction), [SBW25 April  
05],Plate=P02, Coordinates=E12, Trace=q243, [UWGC]  
FT /colour=7  
FT misc\_feature complement(1251848..1251849)  
FT /label=NR32.65  
FT /note=NR32.65, Exact (manual correction), [SBW25 April  
05],Plate=P02, Coordinates=K10, Trace=q238, [UWGC]  
FT /colour=7  
FT misc\_feature 1251849..1251848  
FT /label=NR32.54  
FT /note=NR32.54, Estimate (27), [SBW25 April 05],Plate=P02,  
Coordinates=I12, Trace=q245, [UWGC]  
FT /colour=7  
FT misc\_feature complement(1251857..1251858)  
FT /label=NR32.09  
FT /note=NR32.09, Estimate (0), UWGC re-mapped on dapB deleted  
genome, [SBW25 April 05],Plate=P02, Coordinates=A18, Trace=q265, [UWGC]  
FT /colour=7  
FT misc\_feature complement(1251857..1251858)  
FT /label=NR32.15  
FT /note=NR32.15, Exact (0), UWGC re-mapped on dapB deleted  
genome, [SBW25 April 05],Plate=P02, Coordinates=C6, Trace=q218, [UWGC]  
FT /colour=7  
FT misc\_feature complement(1251863..1251864)  
FT /label=NR32.P08  
FT /note=NR32.P08, Exact (manual correction), [SBW25 April  
05],Plate=P05, Coordinates=P16, Trace=q464, [UWGC]  
FT /colour=7  
FT misc\_feature complement(1251865..1251866)  
FT /label=NR32.69  
FT /note=NR32.69, Exact (manual correction), [SBW25 April  
05],Plate=P02, Coordinates=K18, Trace=q270, [UWGC]  
FT /colour=7  
FT misc\_feature complement(1251873..1251874)

FT /label=NR32.32  
 FT /note=NR32.32, Exact (0), UWGC re-mapped on dapB deleted  
 genome, [SBW25 April 05],Plate=P02, Coordinates=E16, Trace=q259, [UWGC]  
 FT /colour=7  
 FT misc\_feature complement(1251873..1251872)  
 FT /label=NR32.60  
 FT /note=NR32.60, Exact (manual correction), [SBW25 April  
 05],Plate=P02, Coordinates=I24, Trace=q293, [UWGC]  
 FT /colour=7  
 FT misc\_feature complement(1251875..1251876)  
 FT /label=NR32.P12  
 FT /note=NR32.P12, Exact (manual correction), [SBW25 April  
 05],Plate=P05, Coordinates=P24, Trace=q496, [UWGC]  
 FT /colour=7  
 FT misc\_feature 1251876..1251875  
 FT /label=NR32.73  
 FT /note=NR32.73, Exact (0), [SBW25 April 05],Plate=P02,  
 Coordinates=M2, Trace=q207, [UWGC]  
 FT /colour=7  
 FT misc\_feature complement(1251885..1251886)  
 FT /label=NR32.20  
 FT /note=NR32.20, Exact (0), UWGC re-mapped on dapB deleted  
 genome, [SBW25 April 05],Plate=P02, Coordinates=C16, Trace=q258, [UWGC]  
 FT /colour=7  
 FT misc\_feature complement(1251886..1251887)  
 FT /label=NR32.P09  
 FT /note=NR32.P09, Exact (manual correction), [SBW25 April  
 05],Plate=P05, Coordinates=P18, Trace=q472, [UWGC]  
 FT /colour=7  
 FT misc\_feature complement(1251887..1251888)  
 FT /label=NR32.02  
 FT /note=NR32.02, Estimate (9), UWGC re-mapped on dapB deleted  
 genome, [SBW25 April 05],Plate=P02, Coordinates=A4, Trace=q209, [UWGC]  
 FT /colour=7  
 FT misc\_feature complement(1251887..1251888)  
 FT /label=NR32.27  
 FT /note=NR32.27, Exact (0), UWGC re-mapped on dapB deleted  
 genome, [SBW25 April 05],Plate=P02, Coordinates=E6, Trace=q219, [UWGC]  
 FT /colour=7  
 FT misc\_feature complement(1251898..1251899)  
 FT /label=NR32.21  
 FT /note=NR32.21, Exact (0), UWGC re-mapped on dapB deleted  
 genome, [SBW25 April 05],Plate=P02, Coordinates=C18, Trace=q266, [UWGC]  
 FT /colour=7  
 FT misc\_feature complement(1251905..1251906)  
 FT /label=NR32.28  
 FT /note=NR32.28, Estimate (31), UWGC re-mapped on dapB  
 deleted genome, [SBW25 April 05],Plate=P02, Coordinates=E8, Trace=q227, [UWGC]  
 FT /colour=7  
 FT misc\_feature complement(1251908..1251909)  
 FT /label=NR32.P05  
 FT /note=NR32.P05, Exact (manual correction), [SBW25 April  
 05],Plate=P05, Coordinates=N22, Trace=q487, [UWGC]  
 FT /colour=7  
 FT misc\_feature complement(1251914..1251915)  
 FT /label=NR32.67

FT /note=NR32.67, Exact (0), [SBW25 April 05],Plate=P02,  
Coordinates=K14, Trace=q254, [UWGC]  
FT /colour=7  
FT misc\_feature complement(1251929..1251930)  
FT /label=NR32.19  
FT /note=NR32.19, Exact (0), UWGC re-mapped on dapB deleted  
genome, [SBW25 April 05],Plate=P02, Coordinates=C14, Trace=q250, [UWGC]  
FT /colour=7  
FT misc\_feature complement(1251936..1251937)  
FT /label=NR32.07  
FT /note=NR32.07, Exact (0), [SBW25 April 05],Plate=P02,  
Coordinates=A14, Trace=q249, [UWGC]  
FT /colour=7  
FT misc\_feature complement(1251936..1251937)  
FT /label=NR32.P02  
FT /note=NR32.P02, Exact (0), [SBW25 April 05],Plate=P05,  
Coordinates=N16, Trace=q463, [UWGC]  
FT /colour=7  
FT misc\_feature complement(1252041..1252042)  
FT /label=NR32.P04  
FT /note=NR32.P04, Exact (manual correction), [SBW25 April  
05],Plate=P05, Coordinates=N20, Trace=q479, [UWGC]  
FT /colour=7  
FT misc\_feature 1252346..1252345  
FT /label=NR32.62  
FT /note=NR32.62, Exact (0), [SBW25 April 05],Plate=P02,  
Coordinates=K4, Trace=q214, [UWGC]  
FT /colour=7  
FT misc\_feature 1253108..1253107  
FT /label=NR32.68  
FT /note=NR32.68, Estimate (33), [SBW25 April 05],Plate=P02,  
Coordinates=K16, Trace=q262, [UWGC]  
FT /colour=7  
FT misc\_feature 1253132..1253131  
FT /label=NR32.70  
FT /note=NR32.70, Exact (0), [SBW25 April 05],Plate=P02,  
Coordinates=K20, Trace=q278, [UWGC]  
FT /colour=7  
FT misc\_feature 1253142..1253141  
FT /label=NR32.10  
FT /note=NR32.10, Estimate (2), [SBW25 April 05],Plate=P02,  
Coordinates=A20, Trace=q273, [UWGC]  
FT /colour=7  
FT misc\_feature 1253142..1253141  
FT /label=NR32.22  
FT /note=NR32.22, Estimate (2), [SBW25 April 05],Plate=P02,  
Coordinates=C20, Trace=q274, [UWGC]  
FT /colour=7  
FT misc\_feature 1253142..1253141  
FT /label=NR32.48  
FT /note=NR32.48, Estimate (2), [SBW25 April 05],Plate=P02,  
Coordinates=G24, Trace=q292, [UWGC]  
FT /colour=7  
FT misc\_feature 1253172..1253171  
FT /label=NR32.P03  
FT /note=NR32.P03, Estimate (4), [SBW25 April 05],Plate=P05,  
Coordinates=N18, Trace=q471, [UWGC]

FT /colour=7  
FT misc\_feature 1253850..1253849  
FT /label=NR32.52  
FT /note=NR32.52, Estimate (113), [SBW25 April 05],Plate=P02,  
Coordinates=I8, Trace=q229, [UWGC]  
FT /colour=7  
FT misc\_feature 1253872..1253871  
FT /label=NR32.77  
FT /note=NR32.77, Estimate (34), [SBW25 April 05],Plate=P02,  
Coordinates=M10, Trace=q239, [UWGC]  
FT /colour=7  
FT misc\_feature 1253873..1253872  
FT /label=NR32.59  
FT /note=NR32.59, Estimate (32), [SBW25 April 05],Plate=P02,  
Coordinates=I22, Trace=q285, [UWGC]  
FT /colour=7  
FT misc\_feature 1253882..1253881  
FT /label=NR32.29  
FT /note=NR32.29, Estimate (79), [SBW25 April 05],Plate=P02,  
Coordinates=E10, Trace=q235, [UWGC]  
FT /colour=7  
FT misc\_feature 1253896..1253895  
FT /label=NR32.47  
FT /note=NR32.47, Exact (0), [SBW25 April 05],Plate=P02,  
Coordinates=G22, Trace=q284, [UWGC]  
FT /colour=7  
FT misc\_feature 1253905..1253904  
FT /label=NR32.43  
FT /note=NR32.43, Estimate (1), [SBW25 April 05],Plate=P02,  
Coordinates=G14, Trace=q252, [UWGC]  
FT /colour=7  
FT misc\_feature 1253906..1253905  
FT /label=NR32.04  
FT /note=NR32.04, Exact (0), [SBW25 April 05],Plate=P02,  
Coordinates=A8, Trace=q225, [UWGC]  
FT /colour=7  
FT misc\_feature complement(1342167..1342168)  
FT /label=NR54.M5.13  
FT /note=NR54.M5.13, Exact (0), [SBW25 April 05],Plate=PM5.2,  
Coordinates=F3, Trace=C565, [Oxford]  
FT /colour=10  
FT misc\_feature 1343795..1343794  
FT /label=NR49.26  
FT /note=NR49.26, Estimate (152), [SBW25 April 05],Plate=P04,  
Coordinates=F3, Trace=q311, [UWGC]  
FT /colour=7  
FT misc\_feature 1349663..1349662  
FT /label=NR04.114  
FT /note=NR04.114, Exact (0), [SBW25 April 05],Plate=P07,  
Coordinates=B02, Trace=q401, [UWGC]  
FT /colour=7  
FT misc\_feature complement(1358761..1358762)  
FT /label=NR09.60  
FT /note=NR09.60, Exact (manual correction), [SBW25 April  
05],Plate=P07, Coordinates=F07, Trace=q327, [UWGC]  
FT /colour=7  
FT misc\_feature complement(1358782..1358783)

FT /label=NR09.59  
FT /note=NR09.59, Estimate (43), [SBW25 April 05],Plate=P07,  
Coordinates=E07, Trace=q127, [UWGC]  
FT /colour=7  
FT misc\_feature 1359327..1359326  
FT /label=NR09.25  
FT /note=NR09.25, Exact (manual correction), [SBW25 April  
05],Plate=P07, Coordinates=C05, Trace=q118, [UWGC]  
FT /colour=7  
FT misc\_feature complement(1359498..1359499)  
FT /label=NR09.07  
FT /note=NR09.07, Exact (0), [SBW25 April 05],Plate=,  
Coordinates=, Trace=NR9\_07, [Oxford]  
FT /colour=7  
FT misc\_feature complement(1359534..1359535)  
FT /label=NR09.04  
FT /note=NR09.04, Exact (0), [SBW25 April 05],Plate=,  
Coordinates=, Trace=NR9\_04, [Oxford]  
FT /colour=7  
FT misc\_feature complement(1359545..1359546)  
FT /label=NR09.P11  
FT /note=NR09.P11, Exact (0), [SBW25 April 05],Plate=P06,  
Coordinates=K9, Trace=NR9\_P11, [Oxford]  
FT /colour=7  
FT misc\_feature complement(1396711..1396712)  
FT /label=NR48.M5.01  
FT /note=NR48.M5.01, Exact (0), [SBW25 April 05],Plate=PM5.2,  
Coordinates=B12, Trace=C633, [Oxford]  
FT /colour=10  
FT misc\_feature 1479064..1479063  
FT /label=NR12.66  
FT /note=NR12.66, Exact (0), [SBW25 April 05],Plate=P01,  
Coordinates=K12, Trace=q246, [UWGC]  
FT /colour=7  
FT misc\_feature 1493537..1493536  
FT /label=NR54.P02  
FT /note=NR54.P02, Exact (manual correction), [SBW25 April  
05],Plate=P06, Coordinates=A15, Trace=q157, [UWGC]  
FT /colour=7  
FT misc\_feature 1497341..1497340  
FT /label=NR12.64  
FT /note=NR12.64, Exact (0), [SBW25 April 05],Plate=P01,  
Coordinates=K8, Trace=q230, [UWGC]  
FT /colour=7  
FT misc\_feature 1548921..1548920  
FT /label=NR12.P12  
FT /note=NR12.P12, Estimate (17), [SBW25 April 05],Plate=P06,  
Coordinates=O11, Trace=q148, [UWGC]  
FT /colour=7  
FT misc\_feature complement(1592260..1592261)  
FT /label=NR09.84  
FT /note=NR09.84, Estimate (57), [SBW25 April 05],Plate=P07,  
Coordinates=N08, Trace=q431, [UWGC]  
FT /colour=7  
FT misc\_feature 1717891..1717890  
FT /label=NR35.21

FT /note=NR35.21, Estimate (363), UWGC re-mapped on dapB  
 deleted genome, [SBW25 April 05],Plate=P03, Coordinates=C17, Trace=q166, [UWGC]  
 FT /colour=7  
 FT misc\_feature 1717898..1717897  
 FT /label=NR39.25  
 FT /note=NR39.25, Estimate (345), UWGC re-mapped on dapB  
 deleted genome, [SBW25 April 05],Plate=P05, Coordinates=J13, Trace=q353, [UWGC]  
 FT /colour=7  
 FT misc\_feature 1717917..1717916  
 FT /label=NR46.08  
 FT /note=NR46.08, Estimate (337), UWGC re-mapped on dapB  
 deleted genome, [SBW25 April 05],Plate=P04, Coordinates=A16, Trace=q257, [UWGC]  
 FT /colour=7  
 FT misc\_feature 1722531..1722530  
 FT /label=NR12.77  
 FT /note=NR12.77, Exact (0), [SBW25 April 05],Plate=P01,  
 Coordinates=M10, Trace=q239, [UWGC]  
 FT /colour=7  
 FT misc\_feature complement(1723217..1723218)  
 FT /label=NR39.M5.07  
 FT /note=NR39.M5.07, Exact (0), [SBW25 April 05],Plate=PM5.2,  
 Coordinates=A1, Trace=C544, [Oxford]  
 FT /colour=10  
 FT misc\_feature 1729719..1729718  
 FT /label=NR09.30  
 FT /note=NR09.30, Estimate (39), [SBW25 April 05],Plate=P07,  
 Coordinates=H05, Trace=q320, [UWGC]  
 FT /colour=7  
 FT misc\_feature complement(1739182..1739183)  
 FT /label=NR54.P01  
 FT /note=NR54.P01, Exact (manual correction), [SBW25 April  
 05],Plate=P06, Coordinates=A13, Trace=q149, [UWGC]  
 FT /colour=7  
 FT misc\_feature complement(1766221..1766222)  
 FT /label=NR09.16  
 FT /note=NR09.16, Estimate (255), [SBW25 April 05],Plate=P07,  
 Coordinates=J04, Trace=q413, [UWGC]  
 FT /colour=7  
 FT misc\_feature complement(1792913..1792914)  
 FT /label=NR54.100  
 FT /note=NR54.100, Estimate (34), [SBW25 April 05],Plate=P07,  
 Coordinates=A23, Trace=q189, [UWGC]  
 FT /colour=7  
 FT misc\_feature complement(1838683..1838684)  
 FT /label=NR41.62  
 FT /note=NR41.62, Estimate (433), [SBW25 April 05],Plate=P03,  
 Coordinates=L3, Trace=q314, [UWGC]  
 FT /colour=7  
 FT misc\_feature complement(1849674..1849675)  
 FT /label=NR12.34  
 FT /note=NR12.34, Exact (0), [SBW25 April 05],Plate=P01,  
 Coordinates=E20, Trace=q275, [UWGC]  
 FT /colour=7  
 FT misc\_feature 1917491..1917490  
 FT /label=NR04.38  
 FT /note=NR04.38, Estimate (59), [SBW25 April 05],Plate=P01,  
 Coordinates=G3, Trace=q112, [UWGC]



FT /colour=7  
FT misc\_feature complement(1921570..1921571)  
FT /label=NR12.87  
FT /note=NR12.87, Exact (0), [SBW25 April 05],Plate=P01,  
Coordinates=O6, Trace=q224, [UWGC]  
FT /colour=7  
FT misc\_feature 1995785..1995784  
FT /label=NR18.41  
FT /note=NR18.41, Exact (manual correction), [SBW25 April  
05],Plate=P01, Coordinates=H9, Trace=q336, [UWGC]  
FT /colour=7  
FT misc\_feature 2018918..2018917  
FT /label=NR55.06  
FT /note=NR55.06, Exact (0), [SBW25 April 05],Plate=P05,  
Coordinates=A12, Trace=q241, [UWGC]  
FT /colour=7  
FT misc\_feature 2018956..2018955  
FT /label=NR55.04  
FT /note=NR55.04, Estimate (15), [SBW25 April 05],Plate=P05,  
Coordinates=A8, Trace=q225, [UWGC]  
FT /colour=7  
FT misc\_feature complement(2018957..2018958)  
FT /label=NR55.20  
FT /note=NR55.20, Exact (0), UWGC re-mapped on dapB deleted  
genome, [SBW25 April 05],Plate=P05, Coordinates=C16, Trace=q258, [UWGC]  
FT /colour=7  
FT misc\_feature 2018963..2018962  
FT /label=NR55.96  
FT /note=NR55.96, Estimate (10), [SBW25 April 05],Plate=P05,  
Coordinates=O24, Trace=q296, [UWGC]  
FT /colour=7  
FT misc\_feature complement(2018964..2018965)  
FT /label=NR55.16  
FT /note=NR55.16, Estimate (23), UWGC re-mapped on dapB  
deleted genome, [SBW25 April 05],Plate=P05, Coordinates=C8, Trace=q226, [UWGC]  
FT /colour=7  
FT misc\_feature complement(2018964..2018965)  
FT /label=NR55.67  
FT /note=NR55.67, Estimate (23), UWGC re-mapped on dapB  
deleted genome, [SBW25 April 05],Plate=P05, Coordinates=K14, Trace=q254, [UWGC]  
FT /colour=7  
FT misc\_feature 2018970..2018969  
FT /label=NR55.02  
FT /note=NR55.02, Estimate (3), [SBW25 April 05],Plate=P05,  
Coordinates=A4, Trace=q209, [UWGC]  
FT /colour=7  
FT misc\_feature 2018971..2018970  
FT /label=NR55.50  
FT /note=NR55.50, Exact (0), [SBW25 April 05],Plate=P05,  
Coordinates=I4, Trace=q213, [UWGC]  
FT /colour=7  
FT misc\_feature 2018971..2018970  
FT /label=NR55.54  
FT /note=NR55.54, Exact (0), [SBW25 April 05],Plate=P05,  
Coordinates=I12, Trace=q245, [UWGC]  
FT /colour=7  
FT misc\_feature 2018971..2018970

FT /label=NR55.95  
FT /note=NR55.95, Exact (0), [SBW25 April 05],Plate=P05,  
Coordinates=O22, Trace=q288, [UWGC]  
FT /colour=7  
FT misc\_feature 2018976..2018977  
FT /label=NR55.73  
FT /note=NR55.73, Exact (manual correction), [SBW25 April  
05],Plate=P05, Coordinates=M2, Trace=q207, [UWGC]  
FT /colour=7  
FT misc\_feature complement(2018982..2018983)  
FT /label=NR55.66  
FT /note=NR55.66, Estimate (2), [SBW25 April 05],Plate=P05,  
Coordinates=K12, Trace=q246, [UWGC]  
FT /colour=7  
FT misc\_feature complement(2018982..2018983)  
FT /label=NR55.74  
FT /note=NR55.74, Exact (0), [SBW25 April 05],Plate=P05,  
Coordinates=M4, Trace=q215, [UWGC]  
FT /colour=7  
FT misc\_feature complement(2018982..2018983)  
FT /label=NR55.91  
FT /note=NR55.91, Exact (0), [SBW25 April 05],Plate=P05,  
Coordinates=O14, Trace=q256, [UWGC]  
FT /colour=7  
FT misc\_feature complement(2018982..2018983)  
FT /label=NR55.92  
FT /note=NR55.92, Exact (0), [SBW25 April 05],Plate=P05,  
Coordinates=O16, Trace=q264, [UWGC]  
FT /colour=7  
FT misc\_feature 2018995..2018996  
FT /label=NR55.79  
FT /note=NR55.79, Exact (manual correction), [SBW25 April  
05],Plate=P05, Coordinates=M14, Trace=q255, [UWGC]  
FT /colour=7  
FT misc\_feature 2018995..2018994  
FT /label=NR55.18  
FT /note=NR55.18, Estimate (0), [SBW25 April 05],Plate=P05,  
Coordinates=C12, Trace=q242, [UWGC]  
FT /colour=7  
FT misc\_feature complement(2018999..2019000)  
FT /label=NR55.37  
FT /note=NR55.37, Exact (0), [SBW25 April 05],Plate=P05,  
Coordinates=G2, Trace=q204, [UWGC]  
FT /colour=7  
FT misc\_feature 2019033..2019032  
FT /label=NR55.65  
FT /note=NR55.65, Estimate (0), [SBW25 April 05],Plate=P05,  
Coordinates=K10, Trace=q238, [UWGC]  
FT /colour=7  
FT misc\_feature 2019034..2019033  
FT /label=NR55.13  
FT /note=NR55.13, Exact (0), [SBW25 April 05],Plate=P05,  
Coordinates=C2, Trace=q202, [UWGC]  
FT /colour=7  
FT misc\_feature 2019034..2019033  
FT /label=NR55.29

FT /note=NR55.29, Exact (0), [SBW25 April 05],Plate=P05,  
Coordinates=E10, Trace=q235, [UWGC]  
FT /colour=7  
FT misc\_feature 2019034..2019033  
FT /label=NR55.38  
FT /note=NR55.38, Exact (0), [SBW25 April 05],Plate=P05,  
Coordinates=G4, Trace=q212, [UWGC]  
FT /colour=7  
FT misc\_feature 2019035..2019034  
FT /label=NR55.17  
FT /note=NR55.17, Estimate (20), [SBW25 April 05],Plate=P05,  
Coordinates=C10, Trace=q234, [UWGC]  
FT /colour=7  
FT misc\_feature complement(2019039..2019040)  
FT /label=NR55.14  
FT /note=NR55.14, Exact (0), [SBW25 April 05],Plate=P05,  
Coordinates=C4, Trace=q210, [UWGC]  
FT /colour=7  
FT misc\_feature 2019045..2019044  
FT /label=NR55.15  
FT /note=NR55.15, Estimate (2), [SBW25 April 05],Plate=P05,  
Coordinates=C6, Trace=q218, [UWGC]  
FT /colour=7  
FT misc\_feature complement(2019045..2019046)  
FT /label=NR55.33  
FT /note=NR55.33, Exact (0), [SBW25 April 05],Plate=P05,  
Coordinates=E18, Trace=q267, [UWGC]  
FT /colour=7  
FT misc\_feature complement(2019045..2019046)  
FT /label=NR55.34  
FT /note=NR55.34, Exact (0), [SBW25 April 05],Plate=P05,  
Coordinates=E20, Trace=q275, [UWGC]  
FT /colour=7  
FT misc\_feature complement(2019045..2019046)  
FT /label=NR55.45  
FT /note=NR55.45, Exact (0), [SBW25 April 05],Plate=P05,  
Coordinates=G18, Trace=q268, [UWGC]  
FT /colour=7  
FT misc\_feature 2019053..2019052  
FT /label=NR55.42  
FT /note=NR55.42, Exact (0), [SBW25 April 05],Plate=P05,  
Coordinates=G12, Trace=q244, [UWGC]  
FT /colour=7  
FT misc\_feature complement(2019056..2019057)  
FT /label=NR55.35  
FT /note=NR55.35, Exact (0), [SBW25 April 05],Plate=P05,  
Coordinates=E22, Trace=q283, [UWGC]  
FT /colour=7  
FT misc\_feature complement(2019061..2019062)  
FT /label=NR55.78  
FT /note=NR55.78, Exact (0), [SBW25 April 05],Plate=P05,  
Coordinates=M12, Trace=q247, [UWGC]  
FT /colour=7  
FT misc\_feature complement(2019065..2019066)  
FT /label=NR55.46  
FT /note=NR55.46, Estimate (1), [SBW25 April 05],Plate=P05,  
Coordinates=G20, Trace=q276, [UWGC]

FT /colour=7  
 FT misc\_feature complement(2019066..2019067)  
 FT /label=NR55.27  
 FT /note=NR55.27, Exact (0), [SBW25 April 05],Plate=P05,  
 Coordinates=E6, Trace=q219, [UWGC]  
 FT /colour=7  
 FT misc\_feature 2019079..2019078  
 FT /label=NR55.55  
 FT /note=NR55.55, Exact (0), [SBW25 April 05],Plate=P05,  
 Coordinates=I14, Trace=q253, [UWGC]  
 FT /colour=7  
 FT misc\_feature complement(2019083..2019084)  
 FT /label=NR55.70  
 FT /note=NR55.70, Estimate (17), UWGC re-mapped on dapB  
 deleted genome, [SBW25 April 05],Plate=P05, Coordinates=K20, Trace=q278, [UWGC]  
 FT /colour=7  
 FT misc\_feature complement(2019090..2019091)  
 FT /label=NR55.28  
 FT /note=NR55.28, Exact (0), [SBW25 April 05],Plate=P05,  
 Coordinates=E8, Trace=q227, [UWGC]  
 FT /colour=7  
 FT misc\_feature 2019102..2019101  
 FT /label=NR55.57  
 FT /note=NR55.57, Exact (0), [SBW25 April 05],Plate=P05,  
 Coordinates=I18, Trace=q269, [UWGC]  
 FT /colour=7  
 FT misc\_feature complement(2019113..2019114)  
 FT /label=NR55.01  
 FT /note=NR55.01, Exact (0), [SBW25 April 05],Plate=P05,  
 Coordinates=A2, Trace=q201, [UWGC]  
 FT /colour=7  
 FT misc\_feature complement(2019113..2019114)  
 FT /label=NR55.25  
 FT /note=NR55.25, Exact (0), [SBW25 April 05],Plate=P05,  
 Coordinates=E2, Trace=q203, [UWGC]  
 FT /colour=7  
 FT misc\_feature complement(2019113..2019114)  
 FT /label=NR55.43  
 FT /note=NR55.43, Exact (0), [SBW25 April 05],Plate=P05,  
 Coordinates=G14, Trace=q252, [UWGC]  
 FT /colour=7  
 FT misc\_feature 2019137..2019136  
 FT /label=NR55.40  
 FT /note=NR55.40, Exact (0), [SBW25 April 05],Plate=P05,  
 Coordinates=G8, Trace=q228, [UWGC]  
 FT /colour=7  
 FT misc\_feature 2019199..2019198  
 FT /label=NR55.60  
 FT /note=NR55.60, Estimate (8), [SBW25 April 05],Plate=P05,  
 Coordinates=I24, Trace=q293, [UWGC]  
 FT /colour=7  
 FT misc\_feature 2019201..2019200  
 FT /label=NR55.84  
 FT /note=NR55.84, Estimate (6), [SBW25 April 05],Plate=P05,  
 Coordinates=M24, Trace=q295, [UWGC]  
 FT /colour=7  
 FT misc\_feature complement(2019208..2019209)

FT /label=NR55.89  
FT /note=NR55.89, Exact (0), [SBW25 April 05],Plate=P05,  
Coordinates=O10, Trace=q240, [UWGC]  
FT /colour=7  
FT misc\_feature complement(2019216..2019217)  
FT /label=NR55.87  
FT /note=NR55.87, Exact (0), [SBW25 April 05],Plate=P05,  
Coordinates=O6, Trace=q224, [UWGC]  
FT /colour=7  
FT misc\_feature complement(2019227..2019228)  
FT /label=NR55.80  
FT /note=NR55.80, Estimate (1), [SBW25 April 05],Plate=P05,  
Coordinates=M16, Trace=q263, [UWGC]  
FT /colour=7  
FT misc\_feature 2019237..2019236  
FT /label=NR55.56  
FT /note=NR55.56, Exact (0), [SBW25 April 05],Plate=P05,  
Coordinates=I16, Trace=q261, [UWGC]  
FT /colour=7  
FT misc\_feature complement(2019248..2019249)  
FT /label=NR55.21  
FT /note=NR55.21, Exact (0), [SBW25 April 05],Plate=P05,  
Coordinates=C18, Trace=q266, [UWGC]  
FT /colour=7  
FT misc\_feature complement(2019248..2019249)  
FT /label=NR55.32  
FT /note=NR55.32, Exact (0), [SBW25 April 05],Plate=P05,  
Coordinates=E16, Trace=q259, [UWGC]  
FT /colour=7  
FT misc\_feature complement(2019248..2019249)  
FT /label=NR55.47  
FT /note=NR55.47, Exact (0), [SBW25 April 05],Plate=P05,  
Coordinates=G22, Trace=q284, [UWGC]  
FT /colour=7  
FT misc\_feature complement(2019261..2019262)  
FT /label=NR55.10  
FT /note=NR55.10, Estimate (23), [SBW25 April 05],Plate=P05,  
Coordinates=A20, Trace=q273, [UWGC]  
FT /colour=7  
FT misc\_feature 2019270..2019269  
FT /label=NR55.07  
FT /note=NR55.07, Estimate (23), [SBW25 April 05],Plate=P05,  
Coordinates=A14, Trace=q249, [UWGC]  
FT /colour=7  
FT misc\_feature 2019274..2019273  
FT /label=NR55.09  
FT /note=NR55.09, Estimate (19), [SBW25 April 05],Plate=P05,  
Coordinates=A18, Trace=q265, [UWGC]  
FT /colour=7  
FT misc\_feature complement(2019275..2019276)  
FT /label=NR55.26  
FT /note=NR55.26, Exact (0), [SBW25 April 05],Plate=P05,  
Coordinates=E4, Trace=q211, [UWGC]  
FT /colour=7  
FT misc\_feature complement(2019276..2019277)  
FT /label=NR55.08

FT /note=NR55.08, Exact (0), [SBW25 April 05],Plate=P05,  
 Coordinates=A16, Trace=q257, [UWGC]  
 FT /colour=7  
 FT misc\_feature complement(2019284..2019285)  
 FT /label=NR55.72  
 FT /note=NR55.72, Estimate (8), [SBW25 April 05],Plate=P05,  
 Coordinates=K24, Trace=q294, [UWGC]  
 FT /colour=7  
 FT misc\_feature complement(2019285..2019286)  
 FT /label=NR55.24  
 FT /note=NR55.24, Estimate (9), [SBW25 April 05],Plate=P05,  
 Coordinates=C24, Trace=q290, [UWGC]  
 FT /colour=7  
 FT misc\_feature complement(2019290..2019291)  
 FT /label=NR55.58  
 FT /note=NR55.58, Estimate (14), [SBW25 April 05],Plate=P05,  
 Coordinates=I20, Trace=q277, [UWGC]  
 FT /colour=7  
 FT misc\_feature complement(2019291..2019292)  
 FT /label=NR55.22  
 FT /note=NR55.22, Estimate (15), [SBW25 April 05],Plate=P05,  
 Coordinates=C20, Trace=q274, [UWGC]  
 FT /colour=7  
 FT misc\_feature complement(2019291..2019292)  
 FT /label=NR55.41  
 FT /note=NR55.41, Exact (0), [SBW25 April 05],Plate=P05,  
 Coordinates=G10, Trace=q236, [UWGC]  
 FT /colour=7  
 FT misc\_feature complement(2019296..2019297)  
 FT /label=NR55.19  
 FT /note=NR55.19, Exact (0), [SBW25 April 05],Plate=P05,  
 Coordinates=C14, Trace=q250, [UWGC]  
 FT /colour=7  
 FT misc\_feature complement(2019296..2019297)  
 FT /label=NR55.44  
 FT /note=NR55.44, Estimate (75), [SBW25 April 05],Plate=P05,  
 Coordinates=G16, Trace=q260, [UWGC]  
 FT /colour=7  
 FT misc\_feature complement(2019304..2019305)  
 FT /label=NR55.36  
 FT /note=NR55.36, Estimate (8), [SBW25 April 05],Plate=P05,  
 Coordinates=E24, Trace=q291, [UWGC]  
 FT /colour=7  
 FT misc\_feature complement(2019342..2019343)  
 FT /label=NR55.93  
 FT /note=NR55.93, Estimate (14), [SBW25 April 05],Plate=P05,  
 Coordinates=O18, Trace=q272, [UWGC]  
 FT /colour=7  
 FT misc\_feature complement(2019380..2019381)  
 FT /label=NR55.68  
 FT /note=NR55.68, Estimate (24), [SBW25 April 05],Plate=P05,  
 Coordinates=K16, Trace=q262, [UWGC]  
 FT /colour=7  
  
 FT misc\_feature 2019401..2019400  
 FT /label=NR55.39

FT /note=NR55.39, Exact (0), [SBW25 April 05],Plate=P05,  
 Coordinates=G6, Trace=q220, [UWGC]  
 FT /colour=7  
 FT misc\_feature 2019461..2019462  
 FT /label=NR55.48  
 FT /note=NR55.48, Exact (manual correction), [SBW25 April  
 05],Plate=P05, Coordinates=G24, Trace=q292, [UWGC]  
 FT /colour=7  
 FT misc\_feature complement(2051921..2051922)  
 FT /label=NR09.45  
 FT /note=NR09.45, Estimate (297), [SBW25 April 05],Plate=P07,  
 Coordinates=G06, Trace=q220, [UWGC]  
 FT /colour=7  
 FT misc\_feature complement(2097266..2097267)  
 FT /label=NR04.107  
 FT /note=NR04.107, Estimate (34), [SBW25 April 05],Plate=P07,  
 Coordinates=K01, Trace=q106, [UWGC]  
 FT /colour=7  
 FT misc\_feature complement(2108882..2108883)  
 FT /label=NR34.43  
 FT /note=NR34.43,MCS hit =  
 GATCTGCAGGTCGAGCGCT^TAATTAAGTTCGAGTTGGGTATG, [SBW25 April 05],Plate=P02,  
 Coordinates=H14, Trace=q452, [UWGC]  
 FT /colour=7  
 FT misc\_feature complement(2108882..2108883)  
 FT /label=NR34.P01  
 FT /note=NR34.P01,MCS hit =  
 GA^TCTGCAGGTCGAGCGCTTAATTAAGTTCGAGTTGGGTATG, [SBW25 April 05],Plate=P05,  
 Coordinates=F2, Trace=q403, [UWGC]  
 FT /colour=7  
 FT misc\_feature 2108888..2108887  
 FT /label=NR34.02  
 FT /note=NR34.02, Exact (manual correction), [SBW25 April  
 05],Plate=P02, Coordinates=B4, Trace=q409, [UWGC]  
 FT /colour=7  
 FT misc\_feature 2108888..2108887  
 FT /label=NR34.41  
 FT /note=NR34.41, Exact (manual correction), [SBW25 April  
 05],Plate=P02, Coordinates=H10, Trace=q436, [UWGC]  
 FT /colour=7  
 FT misc\_feature 2108889..2108888  
 FT /label=NR34.01  
 FT /note=NR34.01, Exact (0), [SBW25 April 05],Plate=P02,  
 Coordinates=B2, Trace=q401, [UWGC]  
 FT /colour=7  
 FT misc\_feature 2108889..2108888  
 FT /label=NR34.03  
 FT /note=NR34.03, Exact (0), [SBW25 April 05],Plate=P02,  
 Coordinates=B6, Trace=q417, [UWGC]  
 FT /colour=7  
 FT misc\_feature 2108889..2108888  
 FT /label=NR34.16  
 FT /note=NR34.16, Exact (0), [SBW25 April 05],Plate=P02,  
 Coordinates=D8, Trace=q426, [UWGC]  
 FT /colour=7  
 FT misc\_feature 2108889..2108888  
 FT /label=NR34.17

FT /note=NR34.17, Exact (0), [SBW25 April 05],Plate=P02,  
Coordinates=D10, Trace=q434, [UWGC]  
FT /colour=7  
FT misc\_feature 2108889..2108888  
FT /label=NR34.20  
FT /note=NR34.20, Exact (0), [SBW25 April 05],Plate=P02,  
Coordinates=D16, Trace=q458, [UWGC]  
FT /colour=7  
FT misc\_feature 2108889..2108888  
FT /label=NR34.28  
FT /note=NR34.28, Exact (0), [SBW25 April 05],Plate=P02,  
Coordinates=F8, Trace=q427, [UWGC]  
FT /colour=7  
FT misc\_feature 2108889..2108888  
FT /label=NR34.42  
FT /note=NR34.42, Exact (manual correction), [SBW25 April  
05],Plate=P02, Coordinates=H12, Trace=q444, [UWGC]  
FT /colour=7  
FT misc\_feature 2108889..2108888  
FT /label=NR34.45  
FT /note=NR34.45, Estimate (2), [SBW25 April 05],Plate=P02,  
Coordinates=H18, Trace=q468, [UWGC]  
FT /colour=7  
FT misc\_feature 2108889..2108888  
FT /label=NR34.48  
FT /note=NR34.48, Estimate (34), [SBW25 April 05],Plate=P02,  
Coordinates=H24, Trace=q492, [UWGC]  
FT /colour=7  
FT misc\_feature 2108889..2108888  
FT /label=NR34.49  
FT /note=NR34.49, Exact (0), [SBW25 April 05],Plate=P02,  
Coordinates=J2, Trace=q405, [UWGC]  
FT /colour=7  
FT misc\_feature 2108889..2108888  
FT /label=NR34.52  
FT /note=NR34.52, Exact (0), [SBW25 April 05],Plate=P02,  
Coordinates=J8, Trace=q429, [UWGC]  
FT /colour=7  
FT misc\_feature 2108889..2108888  
FT /label=NR34.55  
FT /note=NR34.55, Exact (manual correction), [SBW25 April  
05],Plate=P02, Coordinates=J14, Trace=q453, [UWGC]  
FT /colour=7  
FT misc\_feature 2108889..2108888  
FT /label=NR34.59  
FT /note=NR34.59, Exact (0), [SBW25 April 05],Plate=P02,  
Coordinates=J22, Trace=q485, [UWGC]  
FT /colour=7  
FT misc\_feature 2108889..2108888  
FT /label=NR34.70  
FT /note=NR34.70, Exact (0), [SBW25 April 05],Plate=P02,  
Coordinates=L20, Trace=q478, [UWGC]  
FT /colour=7  
FT misc\_feature 2108889..2108888  
FT /label=NR34.73  
FT /note=NR34.73, Exact (0), [SBW25 April 05],Plate=P02,  
Coordinates=N2, Trace=q407, [UWGC]



FT /colour=7  
FT misc\_feature 2108889..2108888  
FT /label=NR34.74  
FT /note=NR34.74, Exact (manual correction), [SBW25 April 05],Plate=P02, Coordinates=N4, Trace=q415, [UWGC]  
FT /colour=7  
FT misc\_feature 2108889..2108888  
FT /label=NR34.79  
FT /note=NR34.79, Exact (0), [SBW25 April 05],Plate=P02, Coordinates=N14, Trace=q455, [UWGC]  
FT /colour=7  
FT misc\_feature 2108889..2108888  
FT /label=NR34.87  
FT /note=NR34.87, Exact (manual correction), [SBW25 April 05],Plate=P02, Coordinates=P6, Trace=q424, [UWGC]  
FT /colour=7  
FT misc\_feature 2108889..2108888  
FT /label=NR34.88  
FT /note=NR34.88, Exact (0), [SBW25 April 05],Plate=P02, Coordinates=P8, Trace=q432, [UWGC]  
FT /colour=7  
FT misc\_feature 2108889..2108888  
FT /label=NR34.89  
FT /note=NR34.89, Exact (0), [SBW25 April 05],Plate=P02, Coordinates=P10, Trace=q440, [UWGC]  
FT /colour=7  
FT misc\_feature 2108889..2108888  
FT /label=NR34.92  
FT /note=NR34.92, Exact (0), [SBW25 April 05],Plate=P02, Coordinates=P16, Trace=q464, [UWGC]  
FT /colour=7  
FT misc\_feature 2108889..2108888  
FT /label=NR34.93  
FT /note=NR34.93, Exact (0), [SBW25 April 05],Plate=P02, Coordinates=P18, Trace=q472, [UWGC]  
FT /colour=7  
FT misc\_feature 2108899..2108898  
FT /label=NR34.103  
FT /note=NR34.103, Exact (0), [SBW25 April 05],Plate=P07, Coordinates=F13, Trace=q351, [UWGC]  
FT /colour=7  
FT misc\_feature 2108899..2108898  
FT /label=NR34.23  
FT /note=NR34.23, Exact (manual correction), [SBW25 April 05],Plate=P02, Coordinates=D22, Trace=q482, [UWGC]  
FT /colour=7  
FT misc\_feature 2108899..2108898  
FT /label=NR34.32  
FT /note=NR34.32, Exact (0), [SBW25 April 05],Plate=P02, Coordinates=F16, Trace=q459, [UWGC]  
FT /colour=7  
FT misc\_feature 2108899..2108898  
FT /label=NR34.71  
FT /note=NR34.71, Exact (0), [SBW25 April 05],Plate=P02, Coordinates=L22, Trace=q486, [UWGC]  
FT /colour=7  
FT misc\_feature 2108899..2108898

FT /label=NR34.75  
 FT /note=NR34.75, Exact (manual correction), [SBW25 April  
 05],Plate=P02, Coordinates=N6, Trace=q423, [UWGC]  
 FT /colour=7  
 FT misc\_feature 2108900..2108899  
 FT /label=NR34.39  
 FT /note=NR34.39, Exact (manual correction), [SBW25 April  
 05],Plate=P02, Coordinates=H6, Trace=q420, [UWGC]  
 FT /colour=7  
 FT misc\_feature complement(2108900..2108901)  
 FT /label=NR34.11  
 FT /note=NR34.11, Exact (manual correction), [SBW25 April  
 05],Plate=P02, Coordinates=B22, Trace=q481, [UWGC]  
 FT /colour=7  
 FT misc\_feature complement(2108900..2108901)  
 FT /label=NR34.12  
 FT /note=NR34.12, Exact (manual correction), [SBW25 April  
 05],Plate=P02, Coordinates=B24, Trace=q489, [UWGC]  
 FT /colour=7  
 FT misc\_feature complement(2108900..2108901)  
 FT /label=NR34.19  
 FT /note=NR34.19, Exact (manual correction), [SBW25 April  
 05],Plate=P02, Coordinates=D14, Trace=q450, [UWGC]  
 FT /colour=7  
 FT misc\_feature complement(2108900..2108901)  
 FT /label=NR34.22  
 FT /note=NR34.22, Exact (manual correction), [SBW25 April  
 05],Plate=P02, Coordinates=D20, Trace=q474, [UWGC]  
 FT /colour=7  
 FT misc\_feature complement(2108900..2108901)  
 FT /label=NR34.67  
 FT /note=NR34.67, Exact (manual correction), [SBW25 April  
 05],Plate=P02, Coordinates=L14, Trace=q454, [UWGC]  
 FT /colour=7  
 FT misc\_feature complement(2108900..2108901)  
 FT /label=NR34.83  
 FT /note=NR34.83, Exact (manual correction), [SBW25 April  
 05],Plate=P02, Coordinates=N22, Trace=q487, [UWGC]  
 FT /colour=7  
 FT misc\_feature complement(2108900..2108901)  
 FT /label=NR34.95  
 FT /note=NR34.95, Exact (manual correction), [SBW25 April  
 05],Plate=P02, Coordinates=P22, Trace=q488, [UWGC]  
 FT /colour=7  
 FT misc\_feature complement(2108900..2108901)  
 FT /label=NR34.P07  
 FT /note=NR34.P07, Exact (manual correction), [SBW25 April  
 05],Plate=P05, Coordinates=H2, Trace=q404, [UWGC]  
 FT /colour=7  
 FT misc\_feature 2108901..2108900  
 FT /label=NR34.90  
 FT /note=NR34.90, Estimate (10), [SBW25 April 05],Plate=P02,  
 Coordinates=P12, Trace=q448, [UWGC]  
 FT /colour=7  
 FT misc\_feature 2108905..2108904  
 FT /label=NR34.40

FT /note=NR34.40, Estimate (9), [SBW25 April 05],Plate=P02,  
Coordinates=H8, Trace=q428, [UWGC]  
FT /colour=7  
FT misc\_feature complement(2108906..2108907)  
FT /label=NR34.33  
FT /note=NR34.33, Exact (manual correction), [SBW25 April  
05],Plate=P02, Coordinates=F18, Trace=q467, [UWGC]  
FT /colour=7  
FT misc\_feature 2108909..2108908  
FT /label=NR34.05  
FT /note=NR34.05, Exact (0), [SBW25 April 05],Plate=P02,  
Coordinates=B10, Trace=q433, [UWGC]  
FT /colour=7  
FT misc\_feature 2108910..2108911  
FT /label=NR34.44  
FT /note=NR34.44, Exact (manual correction), [SBW25 April  
05],Plate=P02, Coordinates=H16, Trace=q460, [UWGC]  
FT /colour=7  
  
FT misc\_feature complement(2108921..2108922)  
FT /label=NR34.P02  
FT /note=NR34.P02, Exact (0), UWGC re-mapped on dapB deleted  
genome, [SBW25 April 05],Plate=P05, Coordinates=F4, Trace=q411, [UWGC]  
FT /colour=7  
FT misc\_feature complement(2108982..2108983)  
FT /label=NR34.21  
FT /note=NR34.21, Exact (0), [SBW25 April 05],Plate=P02,  
Coordinates=D18, Trace=q466, [UWGC]  
FT /colour=7  
FT misc\_feature complement(2108984..2108985)  
FT /label=NR34.P12  
FT /note=NR34.P12, Estimate (72), UWGC re-mapped on dapB  
deleted genome, [SBW25 April 05],Plate=P05, Coordinates=H12, Trace=q444, [UWGC]  
FT /colour=7  
FT misc\_feature 2108990..2108989  
FT /label=NR34.08  
FT /note=NR34.08, Exact (0), [SBW25 April 05],Plate=P02,  
Coordinates=B16, Trace=q457, [UWGC]  
FT /colour=7  
FT misc\_feature 2108991..2108990  
FT /label=NR34.27  
FT /note=NR34.27, Estimate (26), [SBW25 April 05],Plate=P02,  
Coordinates=F6, Trace=q419, [UWGC]  
FT /colour=7  
FT misc\_feature 2109000..2108999  
FT /label=NR34.58  
FT /note=NR34.58, Exact (0), [SBW25 April 05],Plate=P02,  
Coordinates=J20, Trace=q477, [UWGC]  
FT /colour=7  
FT misc\_feature 2109007..2109006  
FT /label=NR34.98  
FT /note=NR34.98, Estimate (46), [SBW25 April 05],Plate=P07,  
Coordinates=A13, Trace=q149, [UWGC]  
FT /colour=7  
FT misc\_feature 2109010..2109009  
FT /label=NR34.47

FT /note=NR34.47, Exact (0), [SBW25 April 05],Plate=P02,  
Coordinates=H22, Trace=q484, [UWGC]  
FT /colour=7  
FT misc\_feature 2109011..2109010  
FT /label=NR34.100  
FT /note=NR34.100, Estimate (42), [SBW25 April 05],Plate=P07,  
Coordinates=C13, Trace=q150, [UWGC]  
FT /colour=7  
FT misc\_feature complement(2109018..2109019)  
FT /label=NR34.25  
FT /note=NR34.25, Exact (0), [SBW25 April 05],Plate=P02,  
Coordinates=F2, Trace=q403, [UWGC]  
FT /colour=7  
FT misc\_feature 2109019..2109018  
FT /label=NR34.15  
FT /note=NR34.15, Exact (0), [SBW25 April 05],Plate=P02,  
Coordinates=D6, Trace=q418, [UWGC]  
FT /colour=7  
FT misc\_feature 2109019..2109018  
FT /label=NR34.62  
FT /note=NR34.62, Estimate (2), [SBW25 April 05],Plate=P02,  
Coordinates=L4, Trace=q414, [UWGC]  
FT /colour=7  
FT misc\_feature complement(2109029..2109030)  
FT /label=NR34.04  
FT /note=NR34.04, Exact (0), [SBW25 April 05],Plate=P02,  
Coordinates=B8, Trace=q425, [UWGC]  
FT /colour=7  
FT misc\_feature complement(2109029..2109030)  
FT /label=NR34.26  
FT /note=NR34.26, Exact (0), [SBW25 April 05],Plate=P02,  
Coordinates=F4, Trace=q411, [UWGC]  
FT /colour=7  
FT misc\_feature complement(2109029..2109030)  
FT /label=NR34.37  
FT /note=NR34.37, Exact (0), [SBW25 April 05],Plate=P02,  
Coordinates=H2, Trace=q404, [UWGC]  
FT /colour=7  
FT misc\_feature complement(2109029..2109030)  
FT /label=NR34.57  
FT /note=NR34.57, Exact (0), [SBW25 April 05],Plate=P02,  
Coordinates=J18, Trace=q469, [UWGC]  
FT /colour=7  
FT misc\_feature complement(2109029..2109030)  
FT /label=NR34.63  
FT /note=NR34.63, Exact (0), [SBW25 April 05],Plate=P02,  
Coordinates=L6, Trace=q422, [UWGC]  
FT /colour=7  
FT misc\_feature complement(2109029..2109030)  
FT /label=NR34.82  
FT /note=NR34.82, Exact (0), [SBW25 April 05],Plate=P02,  
Coordinates=N20, Trace=q479, [UWGC]  
FT /colour=7  
FT misc\_feature complement(2109029..2109030)  
FT /label=NR34.91  
FT /note=NR34.91, Exact (0), [SBW25 April 05],Plate=P02,  
Coordinates=P14, Trace=q456, [UWGC]

FT /colour=7  
FT misc\_feature complement(2109029..2109030)  
FT /label=NR34.P05  
FT /note=NR34.P05, Exact (0), [SBW25 April 05],Plate=P05,  
Coordinates=F10, Trace=q435, [UWGC]  
FT /colour=7  
FT misc\_feature complement(2109030..2109031)  
FT /label=NR32.82  
FT /note=NR32.82, Estimate (28), [SBW25 April 05],Plate=P02,  
Coordinates=M20, Trace=q279, [UWGC]  
FT /colour=7  
FT misc\_feature 2109046..2109045  
FT /label=NR34.29  
FT /note=NR34.29, Exact (0), [SBW25 April 05],Plate=P02,  
Coordinates=F10, Trace=q435, [UWGC]  
FT /colour=7  
FT misc\_feature 2109049..2109048  
FT /label=NR34.105  
FT /note=NR34.105, Estimate (10), [SBW25 April 05],Plate=P07,  
Coordinates=H13, Trace=q352, [UWGC]  
FT /colour=7  
FT misc\_feature complement(2109052..2109053)  
FT /label=NR34.101  
FT /note=NR34.101, Estimate (33), [SBW25 April 05],Plate=P07,  
Coordinates=D13, Trace=q350, [UWGC]  
FT /colour=7  
FT misc\_feature complement(2109052..2109053)  
FT /label=NR34.66  
FT /note=NR34.66, Exact (0), [SBW25 April 05],Plate=P02,  
Coordinates=L12, Trace=q446, [UWGC]  
FT /colour=7  
FT misc\_feature complement(2109056..2109057)  
FT /label=NR34.34  
FT /note=NR34.34, Estimate (27), UWGC re-mapped on dapB  
deleted genome, [SBW25 April 05],Plate=P02, Coordinates=F20, Trace=q475, [UWGC]  
FT /colour=7  
FT misc\_feature complement(2109057..2109058)  
FT /label=NR34.09  
FT /note=NR34.09, Exact (0), [SBW25 April 05],Plate=P02,  
Coordinates=B18, Trace=q465, [UWGC]  
FT /colour=7  
FT misc\_feature complement(2109057..2109058)  
FT /label=NR34.18  
FT /note=NR34.18, Exact (0), [SBW25 April 05],Plate=P02,  
Coordinates=D12, Trace=q442, [UWGC]  
FT /colour=7  
FT misc\_feature complement(2109057..2109058)  
FT /label=NR34.35  
FT /note=NR34.35, Exact (0), [SBW25 April 05],Plate=P02,  
Coordinates=F22, Trace=q483, [UWGC]  
FT /colour=7  
FT misc\_feature complement(2109057..2109058)  
FT /label=NR34.50  
FT /note=NR34.50, Exact (0), [SBW25 April 05],Plate=P02,  
Coordinates=J4, Trace=q413, [UWGC]  
FT /colour=7  
FT misc\_feature complement(2109057..2109058)

FT /label=NR34.68  
 FT /note=NR34.68, Exact (0), [SBW25 April 05],Plate=P02,  
 Coordinates=L16, Trace=q462, [UWGC]  
 FT /colour=7  
 FT misc\_feature complement(2109057..2109058)  
 FT /label=NR34.94  
 FT /note=NR34.94, Exact (0), [SBW25 April 05],Plate=P02,  
 Coordinates=P20, Trace=q480, [UWGC]  
 FT /colour=7  
 FT misc\_feature 2109058..2109057  
 FT /label=NR34.38  
 FT /note=NR34.38, Exact (0), [SBW25 April 05],Plate=P02,  
 Coordinates=H4, Trace=q412, [UWGC]  
 FT /colour=7  
 FT misc\_feature 2109058..2109057  
 FT /label=NR34.65  
 FT /note=NR34.65, Exact (0), [SBW25 April 05],Plate=P02,  
 Coordinates=L10, Trace=q438, [UWGC]  
 FT /colour=7  
 FT misc\_feature 2109058..2109057  
 FT /label=NR34.81  
 FT /note=NR34.81, Exact (0), [SBW25 April 05],Plate=P02,  
 Coordinates=N18, Trace=q471, [UWGC]  
 FT /colour=7  
 FT misc\_feature 2109068..2109067  
 FT /label=NR34.64  
 FT /note=NR34.64, Exact (0), [SBW25 April 05],Plate=P02,  
 Coordinates=L8, Trace=q430, [UWGC]  
 FT /colour=7  
 FT misc\_feature complement(2109069..2109070)  
 FT /label=NR34.10  
 FT /note=NR34.10, Exact (0), [SBW25 April 05],Plate=P02,  
 Coordinates=B20, Trace=q473, [UWGC]  
 FT /colour=7  
 FT misc\_feature complement(2109069..2109070)  
 FT /label=NR34.76  
 FT /note=NR34.76, Exact (0), [SBW25 April 05],Plate=P02,  
 Coordinates=N8, Trace=q431, [UWGC]  
 FT /colour=7  
 FT misc\_feature complement(2109069..2109070)  
 FT /label=NR34.85  
 FT /note=NR34.85, Exact (0), [SBW25 April 05],Plate=P02,  
 Coordinates=P2, Trace=q408, [UWGC]  
 FT /colour=7  
 FT misc\_feature 2109070..2109069  
 FT /label=NR34.96  
 FT /note=NR34.96, Estimate (0), [SBW25 April 05],Plate=P02,  
 Coordinates=P24, Trace=q496, [UWGC]  
 FT /colour=7  
 FT misc\_feature complement(2109071..2109072)  
 FT /label=NR34.46  
 FT /note=NR34.46, Estimate (7), [SBW25 April 05],Plate=P02,  
 Coordinates=H20, Trace=q476, [UWGC]  
 FT /colour=7  
 FT misc\_feature complement(2109074..2109075)  
 FT /label=NR34.06

FT /note=NR34.06, Exact (0), [SBW25 April 05],Plate=P02,  
Coordinates=B12, Trace=q441, [UWGC]  
FT /colour=7  
FT misc\_feature complement(2109077..2109078)  
FT /label=NR34.104  
FT /note=NR34.104, Estimate (9), [SBW25 April 05],Plate=P07,  
Coordinates=G13, Trace=q152, [UWGC]  
FT /colour=7  
FT misc\_feature complement(2109079..2109080)  
FT /label=NR34.54  
FT /note=NR34.54, Exact (0), [SBW25 April 05],Plate=P02,  
Coordinates=J12, Trace=q445, [UWGC]  
FT /colour=7  
FT misc\_feature complement(2109079..2109080)  
FT /label=NR34.60  
FT /note=NR34.60, Exact (0), [SBW25 April 05],Plate=P02,  
Coordinates=J24, Trace=q493, [UWGC]  
FT /colour=7  
FT misc\_feature complement(2109079..2109080)  
FT /label=NR34.69  
FT /note=NR34.69, Exact (0), [SBW25 April 05],Plate=P02,  
Coordinates=L18, Trace=q470, [UWGC]  
FT /colour=7  
FT misc\_feature complement(2109079..2109080)  
FT /label=NR34.P03  
FT /note=NR34.P03, Exact (0), [SBW25 April 05],Plate=P05,  
Coordinates=F6, Trace=q419, [UWGC]  
FT /colour=7  
FT misc\_feature complement(2109079..2109080)  
FT /label=NR34.P06  
FT /note=NR34.P06, Exact (0), [SBW25 April 05],Plate=P05,  
Coordinates=F12, Trace=q443, [UWGC]  
FT /colour=7  
FT misc\_feature 2109088..2109087  
FT /label=NR34.99  
FT /note=NR34.99, Estimate (32), [SBW25 April 05],Plate=P07,  
Coordinates=B13, Trace=q349, [UWGC]  
FT /colour=7  
FT misc\_feature complement(2109088..2109089)  
FT /label=NR34.P09  
FT /note=NR34.P09, Estimate (9), UWGC re-mapped on dapB  
deleted genome, [SBW25 April 05],Plate=P05, Coordinates=H6, Trace=q420, [UWGC]  
FT /colour=7  
FT misc\_feature complement(2109103..2109104)  
FT /label=NR34.56  
FT /note=NR34.56, Estimate (24), UWGC re-mapped on dapB  
deleted genome, [SBW25 April 05],Plate=P02, Coordinates=J16, Trace=q461, [UWGC]  
FT /colour=7  
FT misc\_feature 2109108..2109107  
FT /label=NR34.84  
FT /note=NR34.84, Exact (0), [SBW25 April 05],Plate=P02,  
Coordinates=N24, Trace=q495, [UWGC]  
FT /colour=7  
FT misc\_feature complement(2109112..2109113)  
FT /label=NR34.102  
FT /note=NR34.102, Exact (0), [SBW25 April 05],Plate=P07,  
Coordinates=E13, Trace=q151, [UWGC]

FT /colour=7  
 FT misc\_feature 2109120..2109119  
 FT /label=NR34.14  
 FT /note=NR34.14, Estimate (0), [SBW25 April 05],Plate=P02,  
 Coordinates=D4, Trace=q410, [UWGC]  
 FT /colour=7  
 FT misc\_feature 2109120..2109119  
 FT /label=NR34.86  
 FT /note=NR34.86, Estimate (0), [SBW25 April 05],Plate=P02,  
 Coordinates=P4, Trace=q416, [UWGC]  
 FT /colour=7  
 FT misc\_feature 2109131..2109130  
 FT /label=NR34.13  
 FT /note=NR34.13, Exact (0), [SBW25 April 05],Plate=P02,  
 Coordinates=D2, Trace=q402, [UWGC]  
 FT /colour=7  
 FT misc\_feature complement(2109131..2109132)  
 FT /label=NR34.36  
 FT /note=NR34.36, Exact (0), [SBW25 April 05],Plate=P02,  
 Coordinates=F24, Trace=q491, [UWGC]  
 FT /colour=7  
 FT misc\_feature complement(2109131..2109132)  
 FT /label=NR34.97  
 FT /note=NR34.97, Exact (0), [SBW25 April 05],Plate=P07,  
 Coordinates=P12, Trace=q448, [UWGC]  
 FT /colour=7  
 FT misc\_feature complement(2109134..2109135)  
 FT /label=NR34.P04  
 FT /note=NR34.P04, Estimate (16), [SBW25 April 05],Plate=P05,  
 Coordinates=F8, Trace=q427, [UWGC]  
 FT /colour=7  
 FT misc\_feature 2109195..2109194  
 FT /label=NR34.P10  
 FT /note=NR34.P10, Exact (0), [SBW25 April 05],Plate=P05,  
 Coordinates=H8, Trace=q428, [UWGC]  
 FT /colour=7  
 FT misc\_feature complement(2109206..2109207)  
 FT /label=NR34.P11  
 FT /note=NR34.P11, Exact (0), [SBW25 April 05],Plate=P05,  
 Coordinates=H10, Trace=q436, [UWGC]  
 FT /colour=7  
 FT misc\_feature complement(2109312..2109313)  
 FT /label=NR34.P08  
 FT /note=NR34.P08, Estimate (93), [SBW25 April 05],Plate=P05,  
 Coordinates=H4, Trace=q412, [UWGC]  
 FT /colour=7  
 FT misc\_feature 2109460..2109461  
 FT /label=NR34.72  
 FT /note=NR34.72, Exact (manual correction), [SBW25 April  
 05],Plate=P02, Coordinates=L24, Trace=q494, [UWGC]  
 FT /colour=7  
 FT misc\_feature 2126857..2126856  
 FT /label=NR55.M5.25  
 FT /note=NR55.M5.25, Exact (0), [SBW25 April 05],Plate=PM5.2,  
 Coordinates=H12, Trace=C639, [Oxford]  
 FT /colour=10  
 FT misc\_feature 2153511..2153510



FT /label=NR20.M5.08  
FT /note=NR20.M5.08, Exact (0), [SBW25 April 05],Plate=PM5.1,  
Coordinates=F4, Trace=C476, [Oxford]  
FT /colour=10  
FT misc\_feature complement(2181127..2181128)  
FT /label=NR04.100  
FT /note=NR04.100, Estimate (13), [SBW25 April 05],Plate=P07,  
Coordinates=D01, Trace=q302, [UWGC]  
FT /colour=7  
FT misc\_feature complement(2208494..2208495)  
FT /label=NR54.109  
FT /note=NR54.109, Estimate (57), [SBW25 April 05],Plate=P07,  
Coordinates=J23, Trace=q393, [UWGC]  
FT /colour=7  
FT misc\_feature complement(2247817..2247818)  
FT /label=NR12.35  
FT /note=NR12.35, Exact (0), [SBW25 April 05],Plate=P01,  
Coordinates=E22, Trace=q283, [UWGC]  
FT /colour=7  
FT misc\_feature complement(2260923..2260924)  
FT /label=NR09.37  
FT /note=NR09.37, Estimate (45), [SBW25 April 05],Plate=P07,  
Coordinates=O05, Trace=q124, [UWGC]  
FT /colour=7  
FT misc\_feature complement(2269082..2269083)  
FT /label=NR12.22  
FT /note=NR12.22, Exact (0), [SBW25 April 05],Plate=P01,  
Coordinates=C20, Trace=q274, [UWGC]  
FT /colour=7  
FT misc\_feature 2313039..2313038  
FT /label=NR20.14  
FT /note=NR20.14, Estimate (552), [SBW25 April 05],Plate=P07,  
Coordinates=B10, Trace=q433, [UWGC]  
FT /colour=7  
FT misc\_feature complement(2319212..2319213)  
FT /label=NR09.31  
FT /note=NR09.31, Estimate (92), [SBW25 April 05],Plate=P07,  
Coordinates=I05, Trace=q121, [UWGC]  
FT /colour=7  
FT misc\_feature complement(2353992..2353993)  
FT /label=NR04.117  
FT /note=NR04.117, Estimate (34), [SBW25 April 05],Plate=P07,  
Coordinates=E02, Trace=q203, [UWGC]  
FT /colour=7  
FT misc\_feature complement(2373896..2373897)  
FT /label=NR55.M5.14  
FT /note=NR55.M5.14, Exact (0), [SBW25 April 05],Plate=PM5.2,  
Coordinates=H1, Trace=C551, [Oxford]  
FT /colour=10  
FT misc\_feature 2449685..2449684  
FT /label=NR54.98  
FT /note=NR54.98, Exact (0), [SBW25 April 05],Plate=P07,  
Coordinates=O22, Trace=q288, [UWGC]  
FT /colour=7  
FT misc\_feature complement(2571717..2571718)  
FT /label=NR55.M5.11

FT /note=NR55.M5.11, Exact (0), [SBW25 April 05],Plate=PM5.3,  
 Coordinates=G10, Trace=C622, [Oxford]  
 FT /colour=10  
 FT misc\_feature complement(2614318..2614317)  
 FT /label=NR54.M5.05  
 FT /note=NR54.M5.05, Exact (0), [SBW25 April 05],Plate=PM5.2,  
 Coordinates=E7, Trace=C596, [Oxford]  
 FT /colour=10  
 FT misc\_feature 2694455..2694454  
 FT /label=NR12.M5.05  
 FT /note=NR12.M5.05, Exact (0), [SBW25 April 05],Plate=PM5.1,  
 Coordinates=D8, Trace=C506, [Oxford]  
 FT /colour=10  
 FT misc\_feature complement(2701713..2701714)  
 FT /label=NR55.M5.21  
 FT /note=NR55.M5.21, Exact (0), [SBW25 April 05],Plate=PM5.2,  
 Coordinates=H8, Trace=C607, [Oxford]  
 FT /colour=10  
 FT misc\_feature 2707324..2707323  
 FT /label=NR55.M5.18  
 FT /note=NR55.M5.18, Exact (0), [SBW25 April 05],Plate=PM5.2,  
 Coordinates=H5, Trace=C583, [Oxford]  
 FT /colour=10  
 FT misc\_feature 2837528..2837527  
 FT /label=NR12.50  
 FT /note=NR12.50, Exact (0), [SBW25 April 05],Plate=P01,  
 Coordinates=I4, Trace=q213, [UWGC]  
 FT /colour=7  
 FT misc\_feature 2860136..2860135  
 FT /label=NR12.83  
 FT /note=NR12.83, Exact (0), [SBW25 April 05],Plate=P01,  
 Coordinates=M22, Trace=q287, [UWGC]  
 FT /colour=7  
 FT misc\_feature complement(2872184..2872185)  
 FT /label=NR49.79  
 FT /note=NR49.79, Exact (0), [SBW25 April 05],Plate=P04,  
 Coordinates=N13, Trace=q355, [UWGC]  
 FT /colour=7  
 FT misc\_feature complement(2872224..2872225)  
 FT /label=NR49.97  
 FT /note=NR49.97, Exact (manual correction), [SBW25 April  
 05],Plate=P07, Coordinates=F17, Trace=q367, [UWGC]  
 FT /colour=7  
 FT misc\_feature complement(2872235..2872236)  
 FT /label=NR49.09  
 FT /note=NR49.09, Exact (0), [SBW25 April 05],Plate=P04,  
 Coordinates=B17, Trace=q365, [UWGC]  
 FT /colour=7  
 FT misc\_feature complement(2872262..2872263)  
 FT /label=NR49.56  
 FT /note=NR49.56, Exact (0), [SBW25 April 05],Plate=P04,  
 Coordinates=J15, Trace=q361, [UWGC]  
 FT /colour=7  
 FT misc\_feature complement(2872265..2872266)  
 FT /label=NR49.102  
 FT /note=NR49.102, Estimate (41), [SBW25 April 05],Plate=P07,  
 Coordinates=K17, Trace=q170, [UWGC]

FT /colour=7  
FT misc\_feature 2872355..2872354  
FT /label=NR49.29  
FT /note=NR49.29, Exact (0), [SBW25 April 05],Plate=P04,  
Coordinates=F9, Trace=q335, [UWGC]  
FT /colour=7  
FT misc\_feature complement(2872381..2872382)  
FT /label=NR49.06  
FT /note=NR49.06, Estimate (0), [SBW25 April 05],Plate=P04,  
Coordinates=B11, Trace=q341, [UWGC]  
FT /colour=7  
FT misc\_feature complement(2872382..2872383)  
FT /label=NR49.10  
FT /note=NR49.10, Exact (0), [SBW25 April 05],Plate=P04,  
Coordinates=B19, Trace=q373, [UWGC]  
FT /colour=7  
FT misc\_feature complement(2872382..2872383)  
FT /label=NR49.17  
FT /note=NR49.17, Exact (0), [SBW25 April 05],Plate=P04,  
Coordinates=D9, Trace=q334, [UWGC]  
FT /colour=7  
FT misc\_feature complement(2872382..2872383)  
FT /label=NR49.51  
FT /note=NR49.51, Exact (0), [SBW25 April 05],Plate=P04,  
Coordinates=J5, Trace=q321, [UWGC]  
FT /colour=7  
FT misc\_feature complement(2872382..2872383)  
FT /label=NR49.85  
FT /note=NR49.85, Exact (0), [SBW25 April 05],Plate=P04,  
Coordinates=P1, Trace=q308, [UWGC]  
FT /colour=7  
FT misc\_feature complement(2872473..2872474)  
FT /label=NR49.47  
FT /note=NR49.47, Exact (0), [SBW25 April 05],Plate=P04,  
Coordinates=H21, Trace=q384, [UWGC]  
FT /colour=7  
FT misc\_feature 2872586..2872585  
FT /label=NR49.45  
FT /note=NR49.45, Estimate (28), [SBW25 April 05],Plate=P04,  
Coordinates=H17, Trace=q368, [UWGC]  
FT /colour=7  
FT misc\_feature 2872593..2872592  
FT /label=NR49.106  
FT /note=NR49.106, Estimate (34), [SBW25 April 05],Plate=P07,  
Coordinates=O17, Trace=q172, [UWGC]  
FT /colour=7  
FT misc\_feature 2872598..2872597  
FT /label=NR49.70  
FT /note=NR49.70, Estimate (29), [SBW25 April 05],Plate=P04,  
Coordinates=L19, Trace=q378, [UWGC]  
FT /colour=7  
FT misc\_feature complement(2872599..2872600)  
FT /label=NR49.11  
FT /note=NR49.11, Exact (0), [SBW25 April 05],Plate=P04,  
Coordinates=B21, Trace=q381, [UWGC]  
FT /colour=7  
FT misc\_feature complement(2872599..2872600)

FT /label=NR49.53  
FT /note=NR49.53, Exact (0), [SBW25 April 05],Plate=P04,  
Coordinates=J9, Trace=q337, [UWGC]  
FT /colour=7  
FT misc\_feature complement(2872599..2872600)  
FT /label=NR49.93  
FT /note=NR49.93, Exact (0), [SBW25 April 05],Plate=P04,  
Coordinates=P17, Trace=q372, [UWGC]  
FT /colour=7  
FT misc\_feature 2872607..2872606  
FT /label=NR49.92  
FT /note=NR49.92, Estimate (18), [SBW25 April 05],Plate=P04,  
Coordinates=P15, Trace=q364, [UWGC]  
FT /colour=7  
FT misc\_feature complement(2872623..2872624)  
FT /label=NR49.24  
FT /note=NR49.24, Estimate (24), [SBW25 April 05],Plate=P04,  
Coordinates=D23, Trace=q390, [UWGC]  
FT /colour=7  
FT misc\_feature 2872625..2872624  
FT /label=NR49.68  
FT /note=NR49.68, Exact (0), [SBW25 April 05],Plate=P04,  
Coordinates=L15, Trace=q362, [UWGC]  
FT /colour=7  
FT misc\_feature 2872625..2872624  
FT /label=NR49.69  
FT /note=NR49.69, Exact (0), [SBW25 April 05],Plate=P04,  
Coordinates=L17, Trace=q370, [UWGC]  
FT /colour=7  
FT misc\_feature 2872625..2872624  
FT /label=NR49.80  
FT /note=NR49.80, Exact (0), [SBW25 April 05],Plate=P04,  
Coordinates=N15, Trace=q363, [UWGC]  
FT /colour=7  
FT misc\_feature 2872626..2872625  
FT /label=NR49.16  
FT /note=NR49.16, Exact (0), [SBW25 April 05],Plate=P04,  
Coordinates=D7, Trace=q326, [UWGC]  
FT /colour=7  
FT misc\_feature 2872631..2872630  
FT /label=NR49.65  
FT /note=NR49.65, Estimate (31), UWGC re-mapped on dapB  
deleted genome, [SBW25 April 05],Plate=P04, Coordinates=L9, Trace=q338, [UWGC]  
FT /colour=7  
FT misc\_feature complement(2872635..2872636)  
FT /label=NR49.33  
FT /note=NR49.33, Estimate (5), [SBW25 April 05],Plate=P04,  
Coordinates=F17, Trace=q367, [UWGC]  
FT /colour=7  
FT misc\_feature complement(2872636..2872637)  
FT /label=NR49.34  
FT /note=NR49.34, Exact (0), [SBW25 April 05],Plate=P04,  
Coordinates=F19, Trace=q375, [UWGC]  
FT /colour=7  
FT misc\_feature complement(2872636..2872637)  
FT /label=NR49.36

FT /note=NR49.36, Estimate (5), [SBW25 April 05],Plate=P04,  
 Coordinates=F23, Trace=q391, [UWGC]  
 FT /colour=7  
 FT misc\_feature complement(2872656..2872657)  
 FT /label=NR49.48  
 FT /note=NR49.48, Estimate (20), [SBW25 April 05],Plate=P04,  
 Coordinates=H23, Trace=q392, [UWGC]  
 FT /colour=7  
 FT misc\_feature complement(2872656..2872657)  
 FT /label=NR49.49  
 FT /note=NR49.49, Estimate (24), [SBW25 April 05],Plate=P04,  
 Coordinates=J1, Trace=q305, [UWGC]  
 FT /colour=7  
 FT misc\_feature complement(2872656..2872657)  
 FT /label=NR49.72  
 FT /note=NR49.72, Estimate (27), [SBW25 April 05],Plate=P04,  
 Coordinates=L23, Trace=q394, [UWGC]  
 FT /colour=7  
 FT misc\_feature complement(2872656..2872657)  
 FT /label=NR49.95  
 FT /note=NR49.95, Estimate (20), [SBW25 April 05],Plate=P04,  
 Coordinates=P21, Trace=q388, [UWGC]  
 FT /colour=7  
 FT misc\_feature complement(2872663..2872664)  
 FT /label=NR49.77  
 FT /note=NR49.77, Estimate (29), [SBW25 April 05],Plate=P04,  
 Coordinates=N9, Trace=q339, [UWGC]  
 FT /colour=7  
 FT misc\_feature complement(2872664..2872665)  
 FT /label=NR49.37  
 FT /note=NR49.37, Estimate (32), [SBW25 April 05],Plate=P04,  
 Coordinates=H1, Trace=q304, [UWGC]  
 FT /colour=7  
 FT misc\_feature complement(2872664..2872665)  
 FT /label=NR49.44  
 FT /note=NR49.44, Estimate (30), [SBW25 April 05],Plate=P04,  
 Coordinates=H15, Trace=q360, [UWGC]  
 FT /colour=7  
 FT misc\_feature complement(2872664..2872665)  
 FT /label=NR49.76  
 FT /note=NR49.76, Estimate (30), [SBW25 April 05],Plate=P04,  
 Coordinates=N7, Trace=q331, [UWGC]  
 FT /colour=7  
 FT misc\_feature complement(2872668..2872669)  
 FT /label=NR49.38  
 FT /note=NR49.38, Estimate (37), [SBW25 April 05],Plate=P04,  
 Coordinates=H3, Trace=q312, [UWGC]  
 FT /colour=7  
 FT misc\_feature 2872676..2872675  
 FT /label=NR49.42  
 FT /note=NR49.42, Exact (0), [SBW25 April 05],Plate=P04,  
 Coordinates=H11, Trace=q344, [UWGC]  
 FT /colour=7  
 FT misc\_feature 2872676..2872675  
 FT /label=NR49.90  
 FT /note=NR49.90, Exact (0), [SBW25 April 05],Plate=P04,  
 Coordinates=P11, Trace=q348, [UWGC]

FT /colour=7  
FT misc\_feature 2872764..2872763  
FT /label=NR49.60  
FT /note=NR49.60, Estimate (1), [SBW25 April 05],Plate=P04,  
Coordinates=J23, Trace=q393, [UWGC]  
FT /colour=7  
FT misc\_feature 2872792..2872791  
FT /label=NR49.94  
FT /note=NR49.94, Exact (0), [SBW25 April 05],Plate=P04,  
Coordinates=P19, Trace=q380, [UWGC]  
FT /colour=7  
FT misc\_feature 2872808..2872807  
FT /label=NR49.21  
FT /note=NR49.21, Estimate (0), [SBW25 April 05],Plate=P04,  
Coordinates=D17, Trace=q366, [UWGC]  
FT /colour=7  
FT misc\_feature 2872810..2872809  
FT /label=NR49.98  
FT /note=NR49.98, Estimate (35), [SBW25 April 05],Plate=P07,  
Coordinates=G17, Trace=q168, [UWGC]  
FT /colour=7  
FT misc\_feature 2872826..2872825  
FT /label=NR49.101  
FT /note=NR49.101, Estimate (33), [SBW25 April 05],Plate=P07,  
Coordinates=J17, Trace=q369, [UWGC]  
FT /colour=7  
FT misc\_feature complement(2872836..2872837)  
FT /label=NR49.41  
FT /note=NR49.41, Exact (0), [SBW25 April 05],Plate=P04,  
Coordinates=H9, Trace=q336, [UWGC]  
FT /colour=7  
FT misc\_feature 2872844..2872843  
FT /label=NR49.27  
FT /note=NR49.27, Estimate (0), [SBW25 April 05],Plate=P04,  
Coordinates=F5, Trace=q319, [UWGC]  
FT /colour=7  
FT misc\_feature 2872859..2872858  
FT /label=NR49.88  
FT /note=NR49.88, Exact (0), [SBW25 April 05],Plate=P04,  
Coordinates=P7, Trace=q332, [UWGC]  
FT /colour=7  
FT misc\_feature 2872859..2872858  
FT /label=NR51.09  
FT /note=NR51.09, Estimate (1), [SBW25 April 05],Plate=P07,  
Coordinates=J18, Trace=q469, [UWGC]  
FT /colour=7  
FT misc\_feature 2872877..2872876  
FT /label=NR49.96  
FT /note=NR49.96, Estimate (25), UWGC re-mapped on dapB  
deleted genome, [SBW25 April 05],Plate=P04, Coordinates=P23, Trace=q396, [UWGC]  
FT /colour=7  
FT misc\_feature 2872878..2872877  
FT /label=NR49.104  
FT /note=NR49.104, Exact (0), [SBW25 April 05],Plate=P07,  
Coordinates=M17, Trace=q171, [UWGC]  
FT /colour=7  
FT misc\_feature 2872878..2872877

FT /label=NR49.13  
FT /note=NR49.13, Exact (0), [SBW25 April 05],Plate=P04,  
Coordinates=D1, Trace=q302, [UWGC]  
FT /colour=7  
FT misc\_feature 2872878..2872877  
FT /label=NR49.91  
FT /note=NR49.91, Estimate (14), [SBW25 April 05],Plate=P04,  
Coordinates=P13, Trace=q356, [UWGC]  
FT /colour=7  
FT misc\_feature 2872879..2872878  
FT /label=NR49.86  
FT /note=NR49.86, Estimate (28), UWGC re-mapped on dapB  
deleted genome, [SBW25 April 05],Plate=P04, Coordinates=P3, Trace=q316, [UWGC]  
FT /colour=7  
FT misc\_feature complement(2872889..2872890)  
FT /label=NR49.19  
FT /note=NR49.19, Exact (0), [SBW25 April 05],Plate=P04,  
Coordinates=D13, Trace=q350, [UWGC]  
FT /colour=7  
FT misc\_feature complement(2872894..2872895)  
FT /label=NR49.84  
FT /note=NR49.84, Estimate (24), [SBW25 April 05],Plate=P04,  
Coordinates=N23, Trace=q395, [UWGC]  
FT /colour=7  
FT misc\_feature complement(2872897..2872898)  
FT /label=NR49.83  
FT /note=NR49.83, Estimate (27), [SBW25 April 05],Plate=P04,  
Coordinates=N21, Trace=q387, [UWGC]  
FT /colour=7  
FT misc\_feature 2872898..2872897  
FT /label=NR49.89  
FT /note=NR49.89, Estimate (19), UWGC re-mapped on dapB  
deleted genome, [SBW25 April 05],Plate=P04, Coordinates=P9, Trace=q340, [UWGC]  
FT /colour=7  
FT misc\_feature 2872902..2872901  
FT /label=NR49.05  
FT /note=NR49.05, Exact (0), [SBW25 April 05],Plate=P04,  
Coordinates=B9, Trace=q333, [UWGC]  
FT /colour=7  
FT misc\_feature 2872902..2872901  
FT /label=NR49.31  
FT /note=NR49.31, Exact (0), [SBW25 April 05],Plate=P04,  
Coordinates=F13, Trace=q351, [UWGC]  
FT /colour=7  
FT misc\_feature complement(2872902..2872903)  
FT /label=NR49.105  
FT /note=NR49.105, Estimate (30), [SBW25 April 05],Plate=P07,  
Coordinates=N17, Trace=q371, [UWGC]  
FT /colour=7  
FT misc\_feature 2872906..2872905  
FT /label=NR49.03  
FT /note=NR49.03, Estimate (1), [SBW25 April 05],Plate=P04,  
Coordinates=B5, Trace=q317, [UWGC]  
FT /colour=7  
FT misc\_feature 2872907..2872906  
FT /label=NR49.02

FT /note=NR49.02, Exact (0), [SBW25 April 05],Plate=P04,  
 Coordinates=B3, Trace=q309, [UWGC]  
 FT /colour=7  
 FT misc\_feature 2872907..2872906  
 FT /label=NR49.12  
 FT /note=NR49.12, Exact (0), [SBW25 April 05],Plate=P04,  
 Coordinates=B23, Trace=q389, [UWGC]  
 FT /colour=7  
 FT misc\_feature 2872907..2872906  
 FT /label=NR49.57  
 FT /note=NR49.57, Exact (0), [SBW25 April 05],Plate=P04,  
 Coordinates=J17, Trace=q369, [UWGC]  
 FT /colour=7  
 FT misc\_feature 2872907..2872906  
 FT /label=NR49.62  
 FT /note=NR49.62, Exact (0), [SBW25 April 05],Plate=P04,  
 Coordinates=L3, Trace=q314, [UWGC]  
 FT /colour=7  
 FT misc\_feature 2872907..2872906  
 FT /label=NR49.81  
 FT /note=NR49.81, Exact (0), [SBW25 April 05],Plate=P04,  
 Coordinates=N17, Trace=q371, [UWGC]  
 FT /colour=7  
 FT misc\_feature 2872908..2872907  
 FT /label=NR49.20  
 FT /note=NR49.20, Exact (0), [SBW25 April 05],Plate=P04,  
 Coordinates=D15, Trace=q358, [UWGC]  
 FT /colour=7  
 FT misc\_feature complement(2872912..2872913)  
 FT /label=NR49.64  
 FT /note=NR49.64, Estimate (1), [SBW25 April 05],Plate=P04,  
 Coordinates=L7, Trace=q330, [UWGC]  
 FT /colour=7  
 FT misc\_feature complement(2872913..2872914)  
 FT /label=NR49.22  
 FT /note=NR49.22, Estimate (2), [SBW25 April 05],Plate=P04,  
 Coordinates=D19, Trace=q374, [UWGC]  
 FT /colour=7  
 FT misc\_feature complement(2872917..2872918)  
 FT /label=NR49.18  
 FT /note=NR49.18, Estimate (0), [SBW25 April 05],Plate=P04,  
 Coordinates=D11, Trace=q342, [UWGC]  
 FT /colour=7  
 FT misc\_feature complement(2872917..2872918)  
 FT /label=NR49.58  
 FT /note=NR49.58, Estimate (28), [SBW25 April 05],Plate=P04,  
 Coordinates=J19, Trace=q377, [UWGC]  
 FT /colour=7  
 FT misc\_feature complement(2872918..2872919)  
 FT /label=NR49.30  
 FT /note=NR49.30, Exact (0), [SBW25 April 05],Plate=P04,  
 Coordinates=F11, Trace=q343, [UWGC]  
 FT /colour=7  
 FT misc\_feature complement(2872923..2872924)  
 FT /label=NR49.61  
 FT /note=NR49.61, Exact (0), [SBW25 April 05],Plate=P04,  
 Coordinates=L1, Trace=q306, [UWGC]



FT /colour=7  
FT misc\_feature 2872931..2872930  
FT /label=NR49.28  
FT /note=NR49.28, Estimate (0), UWGC re-mapped on dapB deleted genome, [SBW25 April 05],Plate=P04, Coordinates=F7, Trace=q327, [UWGC]  
FT /colour=7  
FT misc\_feature complement(2872941..2872942)  
FT /label=NR49.01  
FT /note=NR49.01, Estimate (30), [SBW25 April 05],Plate=P04, Coordinates=B1, Trace=q301, [UWGC]  
FT /colour=7  
FT misc\_feature complement(2872945..2872946)  
FT /label=NR49.67  
FT /note=NR49.67, Estimate (27), [SBW25 April 05],Plate=P04, Coordinates=L13, Trace=q354, [UWGC]  
FT /colour=7  
FT misc\_feature complement(2872950..2872951)  
FT /label=NR49.15  
FT /note=NR49.15, Estimate (27), [SBW25 April 05],Plate=P04, Coordinates=D5, Trace=q318, [UWGC]  
FT /colour=7  
FT misc\_feature complement(2872965..2872966)  
FT /label=NR49.23  
FT /note=NR49.23, Estimate (0), [SBW25 April 05],Plate=P04, Coordinates=D21, Trace=q382, [UWGC]  
FT /colour=7  
FT misc\_feature complement(2872966..2872967)  
FT /label=NR49.54  
FT /note=NR49.54, Exact (0), [SBW25 April 05],Plate=P04, Coordinates=J11, Trace=q345, [UWGC]  
FT /colour=7  
FT misc\_feature complement(2872966..2872967)  
FT /label=NR49.82  
FT /note=NR49.82, Exact (0), [SBW25 April 05],Plate=P04, Coordinates=N19, Trace=q379, [UWGC]  
FT /colour=7  
FT misc\_feature complement(2872975..2872976)  
FT /label=NR49.08  
FT /note=NR49.08, Exact (0), [SBW25 April 05],Plate=P04, Coordinates=B15, Trace=q357, [UWGC]  
FT /colour=7  
FT misc\_feature complement(2872978..2872979)  
FT /label=NR49.75  
FT /note=NR49.75, Estimate (26), [SBW25 April 05],Plate=P04, Coordinates=N5, Trace=q323, [UWGC]  
FT /colour=7  
FT misc\_feature complement(2872985..2872986)  
FT /label=NR49.43  
FT /note=NR49.43, Exact (manual correction), [SBW25 April 05],Plate=P04, Coordinates=H13, Trace=q352, [UWGC]  
FT /colour=7  
FT misc\_feature complement(2872985..2872986)  
FT /label=NR49.52  
FT /note=NR49.52, Exact (0), [SBW25 April 05],Plate=P04, Coordinates=J7, Trace=q329, [UWGC]  
FT /colour=7  
FT misc\_feature complement(2872985..2872986)

FT /label=NR49.63  
FT /note=NR49.63, Exact (0), [SBW25 April 05],Plate=P04,  
Coordinates=L5, Trace=q322, [UWGC]  
FT /colour=7  
FT misc\_feature 2872988..2872987  
FT /label=NR49.39  
FT /note=NR49.39, Exact (manual correction), [SBW25 April  
05],Plate=P04, Coordinates=H5, Trace=q320, [UWGC]  
FT /colour=7  
FT misc\_feature 2872988..2872987  
FT /label=NR49.46  
FT /note=NR49.46, Exact (manual correction), [SBW25 April  
05],Plate=P04, Coordinates=H19, Trace=q376, [UWGC]  
FT /colour=7  
FT misc\_feature 2872988..2872987  
FT /label=NR49.59  
FT /note=NR49.59, Exact (manual correction), [SBW25 April  
05],Plate=P04, Coordinates=J21, Trace=q385, [UWGC]  
FT /colour=7  
FT misc\_feature 2872988..2872987  
FT /label=NR49.78  
FT /note=NR49.78, Exact (manual correction), [SBW25 April  
05],Plate=P04, Coordinates=N11, Trace=q347, [UWGC]  
FT /colour=7  
FT misc\_feature complement(2872991..2872992)  
FT /label=NR49.04  
FT /note=NR49.04, Exact (0), [SBW25 April 05],Plate=P04,  
Coordinates=B7, Trace=q325, [UWGC]  
FT /colour=7  
FT misc\_feature 2872999..2872998  
FT /label=NR49.07  
FT /note=NR49.07, Exact (manual correction), [SBW25 April  
05],Plate=P04, Coordinates=B13, Trace=q349, [UWGC]  
FT /colour=7  
FT misc\_feature 2872999..2872998  
FT /label=NR49.73  
FT /note=NR49.73, Exact (manual correction), [SBW25 April  
05],Plate=P04, Coordinates=N1, Trace=q307, [UWGC]  
FT /colour=7  
FT misc\_feature complement(2872999..2873000)  
FT /label=NR49.66  
FT /note=NR49.66, Exact (0), [SBW25 April 05],Plate=P04,  
Coordinates=L11, Trace=q346, [UWGC]  
FT /colour=7  
FT misc\_feature complement(2872999..2873000)  
FT /label=NR49.71  
FT /note=NR49.71, Exact (manual correction), [SBW25 April  
05],Plate=P04, Coordinates=L21, Trace=q386, [UWGC]  
FT /colour=7  
FT misc\_feature complement(2873003..2873004)  
FT /label=NR49.87  
FT /note=NR49.87, Estimate (18), [SBW25 April 05],Plate=P04,  
Coordinates=P5, Trace=q324, [UWGC]  
FT /colour=7  
FT misc\_feature 2873009..2873010  
FT /label=NR49.32

FT /note=NR49.32,MCS hit =  
 ^GATCTGCAGGTCGAGCGCTTAATTAAC^TAGTCGAGTTGGGTATG, [SBW25 April 05],Plate=P04,  
 Coordinates=F15, Trace=q359, [UWGC]  
 FT /colour=7  
 FT misc\_feature 2873009..2873010  
 FT /label=NR49.40  
 FT /note=NR49.40,MCS hit =  
 GATCTGCAGGTCGAGCGCTTAATTAAC^TAGTCGAGTTGGGTATG, [SBW25 April 05],Plate=P04,  
 Coordinates=H7, Trace=q328, [UWGC]  
 FT /colour=7  
 FT misc\_feature complement(2873009..2873010)  
 FT /label=NR49.25  
 FT /note=NR49.25, Exact (0), [SBW25 April 05],Plate=P04,  
 Coordinates=F1, Trace=q303, [UWGC]  
 FT /colour=7  
 FT misc\_feature complement(2873009..2873010)  
 FT /label=NR49.74  
 FT /note=NR49.74, Exact (manual correction), [SBW25 April  
 05],Plate=P04, Coordinates=N3, Trace=q315, [UWGC]  
 FT /colour=7  
 FT misc\_feature 2878573..2878572  
 FT /label=NR09.99  
 FT /note=NR09.99, Estimate (54), [SBW25 April 05],Plate=P07,  
 Coordinates=M09, Trace=q139, [UWGC]  
 FT /colour=7  
 FT misc\_feature complement(2899614..2899615)  
 FT /label=NR04.P03  
 FT /note=NR04.P03, Exact (manual correction), [SBW25 April  
 05],Plate=P06, Coordinates=E5, Trace=q119, [UWGC]  
 FT /colour=7  
 FT misc\_feature 2988438..2988439  
 FT /label=NR33.19  
 FT /note=NR33.19, Exact (manual correction), [SBW25 April  
 05],Plate=P02, Coordinates=D13, Trace=q350, [UWGC]  
 FT /colour=7  
 FT misc\_feature complement(2988444..2988445)  
 FT /label=NR33.102  
 FT /note=NR33.102, Estimate (0), [SBW25 April 05],Plate=P07,  
 Coordinates=M11, Trace=q147, [UWGC]  
 FT /colour=7  
 FT misc\_feature complement(2988444..2988445)  
 FT /label=NR33.107  
 FT /note=NR33.107, Estimate (0), [SBW25 April 05],Plate=P07,  
 Coordinates=B12, Trace=q441, [UWGC]  
 FT /colour=7  
 FT misc\_feature 2988665..2988664  
 FT /label=NR33.110  
 FT /note=NR33.110, Exact (0), [SBW25 April 05],Plate=P07,  
 Coordinates=E12, Trace=q243, [UWGC]  
 FT /colour=7  
 FT misc\_feature 2988685..2988684  
 FT /label=NR33.90  
 FT /note=NR33.90, Estimate (32), [SBW25 April 05],Plate=P02,  
 Coordinates=P11, Trace=q348, [UWGC]  
 FT /colour=7  
 FT misc\_feature 2988691..2988690  
 FT /label=NR33.86

FT /note=NR33.86, Estimate (26), [SBW25 April 05],Plate=P02,  
Coordinates=P3, Trace=q316, [UWGC]  
FT /colour=7  
FT misc\_feature 2988694..2988693  
FT /label=NR33.P12  
FT /note=NR33.P12, Exact (0), [SBW25 April 05],Plate=P05,  
Coordinates=D12, Trace=q442, [UWGC]  
FT /colour=7  
FT misc\_feature complement(2988698..2988699)  
FT /label=NR33.76  
FT /note=NR33.76, Estimate (2), [SBW25 April 05],Plate=P02,  
Coordinates=N7, Trace=q331, [UWGC]  
FT /colour=7  
FT misc\_feature complement(2988698..2988699)  
FT /label=NR33.P09  
FT /note=NR33.P09, Exact (0), [SBW25 April 05],Plate=P05,  
Coordinates=D6, Trace=q418, [UWGC]  
FT /colour=7  
FT misc\_feature 2988702..2988701  
FT /label=NR33.P03  
FT /note=NR33.P03, Estimate (15), [SBW25 April 05],Plate=P05,  
Coordinates=B6, Trace=q417, [UWGC]  
FT /colour=7  
FT misc\_feature complement(2988705..2988706)  
FT /label=NR33.18  
FT /note=NR33.18, Estimate (2), [SBW25 April 05],Plate=P02,  
Coordinates=D11, Trace=q342, [UWGC]  
FT /colour=7  
FT misc\_feature 2988718..2988717  
FT /label=NR33.117  
FT /note=NR33.117, Exact (0), [SBW25 April 05],Plate=P07,  
Coordinates=L12, Trace=q446, [UWGC]  
FT /colour=7  
FT misc\_feature complement(2988729..2988730)  
FT /label=NR33.P10  
FT /note=NR33.P10, Exact (0), [SBW25 April 05],Plate=P05,  
Coordinates=D8, Trace=q426, [UWGC]  
FT /colour=7  
FT misc\_feature 2988759..2988758  
FT /label=NR33.118  
FT /note=NR33.118, Exact (0), [SBW25 April 05],Plate=P07,  
Coordinates=M12, Trace=q247, [UWGC]  
FT /colour=7  
FT misc\_feature 2988759..2988758  
FT /label=NR33.39  
FT /note=NR33.39, Exact (0), [SBW25 April 05],Plate=P02,  
Coordinates=H5, Trace=q320, [UWGC]  
FT /colour=7  
FT misc\_feature complement(2988770..2988771)  
FT /label=NR33.44  
FT /note=NR33.44, Estimate (3), [SBW25 April 05],Plate=P02,  
Coordinates=H15, Trace=q360, [UWGC]  
FT /colour=7  
FT misc\_feature complement(2988770..2988771)  
FT /label=NR33.45  
FT /note=NR33.45, Exact (0), [SBW25 April 05],Plate=P02,  
Coordinates=H17, Trace=q368, [UWGC]

FT /colour=7  
FT misc\_feature complement(2988770..2988771)  
FT /label=NR33.P07  
FT /note=NR33.P07, Exact (0), [SBW25 April 05],Plate=P05,  
Coordinates=D2, Trace=q402, [UWGC]  
FT /colour=7  
FT misc\_feature complement(2988803..2988804)  
FT /label=NR33.32  
FT /note=NR33.32, Estimate (33), [SBW25 April 05],Plate=P02,  
Coordinates=F15, Trace=q359, [UWGC]  
FT /colour=7  
FT misc\_feature complement(2988815..2988816)  
FT /label=NR33.103  
FT /note=NR33.103, Estimate (12), [SBW25 April 05],Plate=P07,  
Coordinates=N11, Trace=q347, [UWGC]  
FT /colour=7  
FT misc\_feature 2988836..2988835  
FT /label=NR33.66  
FT /note=NR33.66, Exact (0), [SBW25 April 05],Plate=P02,  
Coordinates=L11, Trace=q346, [UWGC]  
FT /colour=7  
FT misc\_feature 2988836..2988835  
FT /label=NR33.M5.07  
FT /note=NR33.M5.07, Exact (0), [SBW25 April 05],Plate=PM5.1,  
Coordinates=G9, Trace=C517, [Oxford]  
FT /colour=10  
FT misc\_feature complement(2988858..2988859)  
FT /label=NR33.38  
FT /note=NR33.38, Estimate (2), [SBW25 April 05],Plate=P02,  
Coordinates=H3, Trace=q312, [UWGC]  
FT /colour=7  
FT misc\_feature 2988899..2988898  
FT /label=NR33.106  
FT /note=NR33.106, Estimate (31), [SBW25 April 05],Plate=P07,  
Coordinates=A12, Trace=q241, [UWGC]  
FT /colour=7  
FT misc\_feature 2988930..2988929  
FT /label=NR33.37  
FT /note=NR33.37, Exact (0), [SBW25 April 05],Plate=P02,  
Coordinates=H1, Trace=q304, [UWGC]  
FT /colour=7  
FT misc\_feature 2988941..2988940  
FT /label=NR33.82  
FT /note=NR33.82, Estimate (33), [SBW25 April 05],Plate=P02,  
Coordinates=N19, Trace=q379, [UWGC]  
FT /colour=7  
FT misc\_feature complement(2988941..2988942)  
FT /label=NR33.108  
FT /note=NR33.108, Exact (0), [SBW25 April 05],Plate=P07,  
Coordinates=C12, Trace=q242, [UWGC]  
FT /colour=7  
FT misc\_feature complement(2988941..2988942)  
FT /label=NR33.P01  
FT /note=NR33.P01, Exact (0), [SBW25 April 05],Plate=P05,  
Coordinates=B2, Trace=q401, [UWGC]  
FT /colour=7  
FT misc\_feature 2988968..2988967

FT /label=NR33.P02  
FT /note=NR33.P02, Exact (0), [SBW25 April 05],Plate=P05,  
Coordinates=B4, Trace=q409, [UWGC]  
FT /colour=7  
FT misc\_feature 2988973..2988972  
FT /label=NR32.81  
FT /note=NR32.81, Estimate (39), [SBW25 April 05],Plate=P02,  
Coordinates=M18, Trace=q271, [UWGC]  
FT /colour=7  
FT misc\_feature 2988989..2988988  
FT /label=NR33.P04  
FT /note=NR33.P04, Exact (0), [SBW25 April 05],Plate=P05,  
Coordinates=B8, Trace=q425, [UWGC]  
FT /colour=7  
FT misc\_feature 2989013..2989012  
FT /label=NR33.12  
FT /note=NR33.12, Exact (0), [SBW25 April 05],Plate=P02,  
Coordinates=B23, Trace=q389, [UWGC]  
FT /colour=7  
FT misc\_feature complement(2989015..2989016)  
FT /label=NR33.P06  
FT /note=NR33.P06, Estimate (5), [SBW25 April 05],Plate=P05,  
Coordinates=B12, Trace=q441, [UWGC]  
FT /colour=7  
FT misc\_feature 2989018..2989017  
FT /label=NR33.113  
FT /note=NR33.113, Estimate (34), [SBW25 April 05],Plate=P07,  
Coordinates=H12, Trace=q444, [UWGC]  
FT /colour=7  
FT misc\_feature 2989020..2989019  
FT /label=NR33.75  
FT /note=NR33.75, Estimate (0), [SBW25 April 05],Plate=P02,  
Coordinates=N5, Trace=q323, [UWGC]  
FT /colour=7  
FT misc\_feature 2989034..2989033  
FT /label=NR33.84  
FT /note=NR33.84, Estimate (36), [SBW25 April 05],Plate=P02,  
Coordinates=N23, Trace=q395, [UWGC]  
FT /colour=7  
FT misc\_feature 2989040..2989039  
FT /label=NR33.61  
FT /note=NR33.61, Estimate (16), [SBW25 April 05],Plate=P02,  
Coordinates=L1, Trace=q306, [UWGC]  
FT /colour=7  
FT misc\_feature 2989060..2989059  
FT /label=NR33.43  
FT /note=NR33.43, Estimate (2), [SBW25 April 05],Plate=P02,  
Coordinates=H13, Trace=q352, [UWGC]  
FT /colour=7  
FT misc\_feature complement(2989079..2989080)  
FT /label=NR33.35  
FT /note=NR33.35, Exact (0), [SBW25 April 05],Plate=P02,  
Coordinates=F21, Trace=q383, [UWGC]  
FT /colour=7  
FT misc\_feature 2989083..2989082  
FT /label=NR33.67

FT /note=NR33.67, Exact (0), [SBW25 April 05],Plate=P02,  
Coordinates=L13, Trace=q354, [UWGC]  
FT /colour=7  
FT misc\_feature complement(2989114..2989115)  
FT /label=NR33.51  
FT /note=NR33.51, Estimate (50), [SBW25 April 05],Plate=P02,  
Coordinates=J5, Trace=q321, [UWGC]  
FT /colour=7  
FT misc\_feature 2989171..2989170  
FT /label=NR33.14  
FT /note=NR33.14, Exact (0), [SBW25 April 05],Plate=P02,  
Coordinates=D3, Trace=q310, [UWGC]  
FT /colour=7  
FT misc\_feature 2989182..2989181  
FT /label=NR33.11  
FT /note=NR33.11, Estimate (26), [SBW25 April 05],Plate=P02,  
Coordinates=B21, Trace=q381, [UWGC]  
FT /colour=7  
FT misc\_feature 2989183..2989182  
FT /label=NR33.54  
FT /note=NR33.54, Exact (0), [SBW25 April 05],Plate=P02,  
Coordinates=J11, Trace=q345, [UWGC]  
FT /colour=7  
FT misc\_feature 2989187..2989186  
FT /label=NR33.96  
FT /note=NR33.96, Estimate (19), [SBW25 April 05],Plate=P02,  
Coordinates=P23, Trace=q396, [UWGC]  
FT /colour=7  
FT misc\_feature 2989187..2989186  
FT /label=NR33.97  
FT /note=NR33.97, Estimate (33), [SBW25 April 05],Plate=P07,  
Coordinates=H11, Trace=q344, [UWGC]  
FT /colour=7  
FT misc\_feature 2989188..2989187  
FT /label=NR33.59  
FT /note=NR33.59, Estimate (32), [SBW25 April 05],Plate=P02,  
Coordinates=J21, Trace=q385, [UWGC]  
FT /colour=7  
FT misc\_feature 2989189..2989188  
FT /label=NR33.105  
FT /note=NR33.105, Estimate (31), [SBW25 April 05],Plate=P07,  
Coordinates=P11, Trace=q348, [UWGC]  
FT /colour=7  
FT misc\_feature 2989189..2989188  
FT /label=NR33.120  
FT /note=NR33.120, Estimate (31), [SBW25 April 05],Plate=P07,  
Coordinates=O12, Trace=q248, [UWGC]  
FT /colour=7  
FT misc\_feature 2989192..2989191  
FT /label=NR33.114  
FT /note=NR33.114, Estimate (28), [SBW25 April 05],Plate=P07,  
Coordinates=I12, Trace=q245, [UWGC]  
FT /colour=7  
FT misc\_feature complement(2989192..2989193)  
FT /label=NR33.69  
FT /note=NR33.69, Exact (0), [SBW25 April 05],Plate=P02,  
Coordinates=L17, Trace=q370, [UWGC]

FT /colour=7  
FT misc\_feature 2989193..2989192  
FT /label=NR33.73  
FT /note=NR33.73, Estimate (27), [SBW25 April 05],Plate=P02,  
Coordinates=N1, Trace=q307, [UWGC]  
FT /colour=7  
FT misc\_feature 2989210..2989209  
FT /label=NR33.P05  
FT /note=NR33.P05, Estimate (13), [SBW25 April 05],Plate=P05,  
Coordinates=B10, Trace=q433, [UWGC]  
FT /colour=7  
FT misc\_feature 2989211..2989210  
FT /label=NR33.60  
FT /note=NR33.60, Exact (0), [SBW25 April 05],Plate=P02,  
Coordinates=J23, Trace=q393, [UWGC]  
FT /colour=7  
FT misc\_feature 2989211..2989210  
FT /label=NR33.M5.01  
FT /note=NR33.M5.01, Exact (0), [SBW25 April 05],Plate=PM5.1,  
Coordinates=G3, Trace=C469, [Oxford]  
FT /colour=10  
FT misc\_feature 2989221..2989220  
FT /label=NR33.06  
FT /note=NR33.06, Exact (0), [SBW25 April 05],Plate=P02,  
Coordinates=B11, Trace=q341, [UWGC]  
FT /colour=7  
FT misc\_feature 2989222..2989221  
FT /label=NR33.104  
FT /note=NR33.104, Estimate (0), [SBW25 April 05],Plate=P07,  
Coordinates=O11, Trace=q148, [UWGC]  
FT /colour=7  
FT misc\_feature complement(2989222..2989223)  
FT /label=NR33.42  
FT /note=NR33.42, Exact (0), [SBW25 April 05],Plate=P02,  
Coordinates=H11, Trace=q344, [UWGC]  
FT /colour=7  
FT misc\_feature complement(2989229..2989230)  
FT /label=NR33.01  
FT /note=NR33.01, Exact (0), [SBW25 April 05],Plate=P02,  
Coordinates=B1, Trace=q301, [UWGC]  
FT /colour=7  
FT misc\_feature complement(2989230..2989231)  
FT /label=NR33.17  
FT /note=NR33.17, Estimate (28), [SBW25 April 05],Plate=P02,  
Coordinates=D9, Trace=q334, [UWGC]  
FT /colour=7  
FT misc\_feature complement(2989231..2989232)  
FT /label=NR33.116  
FT /note=NR33.116, Estimate (2), [SBW25 April 05],Plate=P07,  
Coordinates=K12, Trace=q246, [UWGC]  
FT /colour=7  
FT misc\_feature complement(2989231..2989232)  
FT /label=NR33.31  
FT /note=NR33.31, Estimate (4), [SBW25 April 05],Plate=P02,  
Coordinates=F13, Trace=q351, [UWGC]  
FT /colour=7  
FT misc\_feature complement(2989231..2989232)



FT /label=NR33.53  
FT /note=NR33.53, Estimate (9), [SBW25 April 05],Plate=P02,  
Coordinates=J9, Trace=q337, [UWGC]  
FT /colour=7  
FT misc\_feature complement(2989231..2989232)  
FT /label=NR33.56  
FT /note=NR33.56, Estimate (7), [SBW25 April 05],Plate=P02,  
Coordinates=J15, Trace=q361, [UWGC]  
FT /colour=7  
FT misc\_feature complement(2989231..2989232)  
FT /label=NR33.83  
FT /note=NR33.83, Estimate (9), [SBW25 April 05],Plate=P02,  
Coordinates=N21, Trace=q387, [UWGC]  
FT /colour=7  
FT misc\_feature complement(2989231..2989232)  
FT /label=NR33.98  
FT /note=NR33.98, Estimate (2), [SBW25 April 05],Plate=P07,  
Coordinates=I11, Trace=q145, [UWGC]  
FT /colour=7  
FT misc\_feature complement(2989232..2989233)  
FT /label=NR33.09  
FT /note=NR33.09, Exact (0), [SBW25 April 05],Plate=P02,  
Coordinates=B17, Trace=q365, [UWGC]  
FT /colour=7  
FT misc\_feature complement(2989232..2989233)  
FT /label=NR33.111  
FT /note=NR33.111, Exact (0), [SBW25 April 05],Plate=P07,  
Coordinates=F12, Trace=q443, [UWGC]  
FT /colour=7  
FT misc\_feature complement(2989232..2989233)  
FT /label=NR33.57  
FT /note=NR33.57, Estimate (30), [SBW25 April 05],Plate=P02,  
Coordinates=J17, Trace=q369, [UWGC]  
FT /colour=7  
FT misc\_feature complement(2989232..2989233)  
FT /label=NR33.79  
FT /note=NR33.79, Exact (0), [SBW25 April 05],Plate=P02,  
Coordinates=N13, Trace=q355, [UWGC]  
FT /colour=7  
FT misc\_feature complement(2989233..2989234)  
FT /label=NR33.02  
FT /note=NR33.02, Estimate (23), [SBW25 April 05],Plate=P02,  
Coordinates=B3, Trace=q309, [UWGC]  
FT /colour=7  
FT misc\_feature complement(2989237..2989238)  
FT /label=NR33.94  
FT /note=NR33.94, Estimate (46), [SBW25 April 05],Plate=P02,  
Coordinates=P19, Trace=q380, [UWGC]  
FT /colour=7  
FT misc\_feature complement(2989244..2989245)  
FT /label=NR33.89  
FT /note=NR33.89, Estimate (27), [SBW25 April 05],Plate=P02,  
Coordinates=P9, Trace=q340, [UWGC]  
FT /colour=7  
FT misc\_feature complement(2989247..2989248)  
FT /label=NR33.24

FT /note=NR33.24, Estimate (33), [SBW25 April 05],Plate=P02,  
Coordinates=D23, Trace=q390, [UWGC]  
FT /colour=7  
FT misc\_feature complement(2989256..2989257)  
FT /label=NR33.78  
FT /note=NR33.78, Estimate (34), [SBW25 April 05],Plate=P02,  
Coordinates=N11, Trace=q347, [UWGC]  
FT /colour=7  
FT misc\_feature complement(2989259..2989260)  
FT /label=NR33.88  
FT /note=NR33.88, Estimate (32), [SBW25 April 05],Plate=P02,  
Coordinates=P7, Trace=q332, [UWGC]  
FT /colour=7  
FT misc\_feature complement(2989261..2989262)  
FT /label=NR33.15  
FT /note=NR33.15, Estimate (29), [SBW25 April 05],Plate=P02,  
Coordinates=D5, Trace=q318, [UWGC]  
FT /colour=7  
FT misc\_feature complement(2989261..2989262)  
FT /label=NR33.48  
FT /note=NR33.48, Estimate (69), [SBW25 April 05],Plate=P02,  
Coordinates=H23, Trace=q392, [UWGC]  
FT /colour=7  
FT misc\_feature complement(2989261..2989262)  
FT /label=NR33.62  
FT /note=NR33.62, Estimate (39), [SBW25 April 05],Plate=P02,  
Coordinates=L3, Trace=q314, [UWGC]  
FT /colour=7  
FT misc\_feature 2989262..2989261  
FT /label=NR33.22  
FT /note=NR33.22, Exact (0), [SBW25 April 05],Plate=P02,  
Coordinates=D19, Trace=q374, [UWGC]  
FT /colour=7  
FT misc\_feature complement(2989267..2989268)  
FT /label=NR33.46  
FT /note=NR33.46, Estimate (65), [SBW25 April 05],Plate=P02,  
Coordinates=H19, Trace=q376, [UWGC]  
FT /colour=7  
FT misc\_feature complement(2989273..2989274)  
FT /label=NR33.05  
FT /note=NR33.05, Estimate (26), [SBW25 April 05],Plate=P02,  
Coordinates=B9, Trace=q333, [UWGC]  
FT /colour=7  
FT misc\_feature complement(2989287..2989288)  
FT /label=NR33.P08  
FT /note=NR33.P08, Estimate (70), [SBW25 April 05],Plate=P05,  
Coordinates=D4, Trace=q410, [UWGC]  
FT /colour=7  
FT misc\_feature complement(2989288..2989289)  
FT /label=NR33.64  
FT /note=NR33.64, Exact (0), [SBW25 April 05],Plate=P02,  
Coordinates=L7, Trace=q330, [UWGC]  
FT /colour=7  
FT misc\_feature 2989295..2989294  
FT /label=NR33.77  
FT /note=NR33.77, Exact (0), [SBW25 April 05],Plate=P02,  
Coordinates=N9, Trace=q339, [UWGC]

FT /colour=7  
 FT misc\_feature 2989296..2989295  
 FT /label=NR33.99  
 FT /note=NR33.99, Exact (0), [SBW25 April 05],Plate=P07,  
 Coordinates=J11, Trace=q345, [UWGC]  
 FT /colour=7  
 FT misc\_feature complement(2989305..2989306)  
 FT /label=NR33.92  
 FT /note=NR33.92, Exact (0), [SBW25 April 05],Plate=P02,  
 Coordinates=P15, Trace=q364, [UWGC]  
 FT /colour=7  
 FT misc\_feature complement(2989306..2989307)  
 FT /label=NR32.80  
 FT /note=NR32.80, Estimate (1), [SBW25 April 05],Plate=P02,  
 Coordinates=M16, Trace=q263, [UWGC]  
 FT /colour=7  
 FT misc\_feature complement(2989306..2989307)  
 FT /label=NR33.28  
 FT /note=NR33.28, Exact (0), [SBW25 April 05],Plate=P02,  
 Coordinates=F7, Trace=q327, [UWGC]  
 FT /colour=7  
 FT misc\_feature complement(2989306..2989307)  
 FT /label=NR33.93  
 FT /note=NR33.93, Exact (0), [SBW25 April 05],Plate=P02,  
 Coordinates=P17, Trace=q372, [UWGC]  
 FT /colour=7  
 FT misc\_feature 2989307..2989306  
 FT /label=NR33.119  
 FT /note=NR33.119, Estimate (76), [SBW25 April 05],Plate=P07,  
 Coordinates=N12, Trace=q447, [UWGC]  
 FT /colour=7  
 FT misc\_feature complement(2989307..2989308)  
 FT /label=NR33.03  
 FT /note=NR33.03, Estimate (23), [SBW25 April 05],Plate=P02,  
 Coordinates=B5, Trace=q317, [UWGC]  
 FT /colour=7  
 FT misc\_feature complement(2989307..2989308)  
 FT /label=NR33.20  
 FT /note=NR33.20, Exact (0), [SBW25 April 05],Plate=P02,  
 Coordinates=D15, Trace=q358, [UWGC]  
 FT /colour=7  
 FT misc\_feature 2989314..2989313  
 FT /label=NR33.58  
 FT /note=NR33.58, Exact (0), [SBW25 April 05],Plate=P02,  
 Coordinates=J19, Trace=q377, [UWGC]  
 FT /colour=7  
 FT misc\_feature 2989314..2989313  
 FT /label=NR33.87  
 FT /note=NR33.87, Exact (0), [SBW25 April 05],Plate=P02,  
 Coordinates=P5, Trace=q324, [UWGC]  
 FT /colour=7  
 FT misc\_feature 2989326..2989325  
 FT /label=NR33.71  
 FT /note=NR33.71, Estimate (30), UWGC re-mapped on dapB  
 deleted genome, [SBW25 April 05],Plate=P02, Coordinates=L21, Trace=q386, [UWGC]  
 FT /colour=7  
 FT misc\_feature 2989342..2989341

FT /label=NR33.04  
 FT /note=NR33.04, Estimate (20), UWGC re-mapped on dapB  
 deleted genome, [SBW25 April 05],Plate=P02, Coordinates=B7, Trace=q325, [UWGC]  
 FT /colour=7  
 FT misc\_feature complement(2989358..2989359)  
 FT /label=NR33.68  
 FT /note=NR33.68, Estimate (33), [SBW25 April 05],Plate=P02,  
 Coordinates=L15, Trace=q362, [UWGC]  
 FT /colour=7  
 FT misc\_feature 2989373..2989372  
 FT /label=NR33.70  
 FT /note=NR33.70, Estimate (3), [SBW25 April 05],Plate=P02,  
 Coordinates=L19, Trace=q378, [UWGC]  
 FT /colour=7  
 FT misc\_feature 2989397..2989396  
 FT /label=NR33.65  
 FT /note=NR33.65, Estimate (27), UWGC re-mapped on dapB  
 deleted genome, [SBW25 April 05],Plate=P02, Coordinates=L9, Trace=q338, [UWGC]  
 FT /colour=7  
 FT misc\_feature 2989400..2989399  
 FT /label=NR33.16  
 FT /note=NR33.16, Estimate (29), UWGC re-mapped on dapB  
 deleted genome, [SBW25 April 05],Plate=P02, Coordinates=D7, Trace=q326, [UWGC]  
 FT /colour=7  
 FT misc\_feature 2989402..2989401  
 FT /label=NR33.13  
 FT /note=NR33.13, Estimate (22), UWGC re-mapped on dapB  
 deleted genome, [SBW25 April 05],Plate=P02, Coordinates=D1, Trace=q302, [UWGC]  
 FT /colour=7  
 FT misc\_feature 2989415..2989414  
 FT /label=NR33.10  
 FT /note=NR33.10, Estimate (37), [SBW25 April 05],Plate=P02,  
 Coordinates=B19, Trace=q373, [UWGC]  
 FT /colour=7  
 FT misc\_feature 2989415..2989414  
 FT /label=NR33.30  
 FT /note=NR33.30, Exact (0), [SBW25 April 05],Plate=P02,  
 Coordinates=F11, Trace=q343, [UWGC]  
 FT /colour=7  
 FT misc\_feature 2989419..2989418  
 FT /label=NR33.M5.08  
 FT /note=NR33.M5.08, Exact (0), [SBW25 April 05],Plate=PM5.1,  
 Coordinates=G10, Trace=C525, [Oxford]  
 FT /colour=10  
 FT misc\_feature 2989424..2989423  
 FT /label=NR33.49  
 FT /note=NR33.49, Exact (0), [SBW25 April 05],Plate=P02,  
 Coordinates=J1, Trace=q305, [UWGC]  
 FT /colour=7  
 FT misc\_feature 2989424..2989423  
 FT /label=NR33.50  
 FT /note=NR33.50, Exact (0), [SBW25 April 05],Plate=P02,  
 Coordinates=J3, Trace=q313, [UWGC]  
 FT /colour=7  
 FT misc\_feature complement(2989452..2989453)  
 FT /label=NR33.08

FT /note=NR33.08, Exact (0), [SBW25 April 05],Plate=P02,  
Coordinates=B15, Trace=q357, [UWGC]  
FT /colour=7  
FT misc\_feature complement(2989461..2989462)  
FT /label=NR33.P11  
FT /note=NR33.P11, Exact (0), [SBW25 April 05],Plate=P05,  
Coordinates=D10, Trace=q434, [UWGC]  
FT /colour=7  
FT misc\_feature complement(2989464..2989465)  
FT /label=NR33.91  
FT /note=NR33.91, Estimate (28), [SBW25 April 05],Plate=P02,  
Coordinates=P13, Trace=q356, [UWGC]  
FT /colour=7  
FT misc\_feature complement(2989467..2989468)  
FT /label=NR33.23  
FT /note=NR33.23, Exact (0), [SBW25 April 05],Plate=P02,  
Coordinates=D21, Trace=q382, [UWGC]  
FT /colour=7  
FT misc\_feature 2989483..2989482  
FT /label=NR33.34  
FT /note=NR33.34, Exact (0), [SBW25 April 05],Plate=P02,  
Coordinates=F19, Trace=q375, [UWGC]  
FT /colour=7  
FT misc\_feature 2989489..2989488  
FT /label=NR33.100  
FT /note=NR33.100, Estimate (0), [SBW25 April 05],Plate=P07,  
Coordinates=K11, Trace=q146, [UWGC]  
FT /colour=7  
FT misc\_feature complement(2989499..2989500)  
FT /label=NR33.40  
FT /note=NR33.40, Exact (0), [SBW25 April 05],Plate=P02,  
Coordinates=H7, Trace=q328, [UWGC]  
FT /colour=7  
FT misc\_feature 2989501..2989500  
FT /label=NR33.101  
FT /note=NR33.101, Exact (0), [SBW25 April 05],Plate=P07,  
Coordinates=L11, Trace=q346, [UWGC]  
FT /colour=7  
FT misc\_feature 2989501..2989500  
FT /label=NR33.109  
FT /note=NR33.109, Exact (0), [SBW25 April 05],Plate=P07,  
Coordinates=D12, Trace=q442, [UWGC]  
FT /colour=7  
FT misc\_feature 2989501..2989500  
FT /label=NR33.115  
FT /note=NR33.115, Exact (0), [SBW25 April 05],Plate=P07,  
Coordinates=J12, Trace=q445, [UWGC]  
FT /colour=7  
FT misc\_feature 2989501..2989500  
FT /label=NR33.27  
FT /note=NR33.27, Exact (0), UWGC re-mapped on dapB deleted  
genome, [SBW25 April 05],Plate=P02, Coordinates=F5, Trace=q319, [UWGC]  
FT /colour=7  
FT misc\_feature complement(2989524..2989525)  
FT /label=NR33.74  
FT /note=NR33.74, Exact (0), [SBW25 April 05],Plate=P02,  
Coordinates=N3, Trace=q315, [UWGC]

FT /colour=7  
 FT misc\_feature complement(2989579..2989580)  
 FT /label=NR33.36  
 FT /note=NR33.36, Estimate (26), [SBW25 April 05],Plate=P02,  
 Coordinates=F23, Trace=q391, [UWGC]  
 FT /colour=7  
 FT misc\_feature complement(2989580..2989581)  
 FT /label=NR33.47  
 FT /note=NR33.47, Estimate (33), [SBW25 April 05],Plate=P02,  
 Coordinates=H21, Trace=q384, [UWGC]  
 FT /colour=7  
 FT misc\_feature complement(2989583..2989584)  
 FT /label=NR33.52  
 FT /note=NR33.52, Exact (0), [SBW25 April 05],Plate=P02,  
 Coordinates=J7, Trace=q329, [UWGC]  
 FT /colour=7  
 FT misc\_feature complement(2989585..2989586)  
 FT /label=NR33.112  
 FT /note=NR33.112, Estimate (37), [SBW25 April 05],Plate=P07,  
 Coordinates=G12, Trace=q244, [UWGC]  
 FT /colour=7  
 FT misc\_feature 2989590..2989589  
 FT /label=NR33.M5.06  
 FT /note=NR33.M5.06,MCS hit  
 =GATCTGCAGGTCGAGCGCTTAATTAAGTGC^GAGTTGGGTATG, [SBW25 April 05],Plate=PM5.1,  
 Coordinates=G8, Trace=C509, [Oxford]  
 FT /colour=10  
 FT misc\_feature 3020173..3020172  
 FT /label=NR12.40  
 FT /note=NR12.40, Exact (0), [SBW25 April 05],Plate=P01,  
 Coordinates=G8, Trace=q228, [UWGC]  
 FT /colour=7  
 FT misc\_feature 3082068..3082067  
 FT /label=NR55.M5.22  
 FT /note=NR55.M5.22, Exact (0), [SBW25 April 05],Plate=PM5.2,  
 Coordinates=H9, Trace=C615, [Oxford]  
 FT /colour=10  
 FT misc\_feature 3165851..3165850  
 FT /label=NR39.M5.08  
 FT /note=NR39.M5.08, Exact (0), [SBW25 April 05],Plate=PM5.2,  
 Coordinates=A2, Trace=C552, [Oxford]  
 FT /colour=10  
 FT misc\_feature complement(3181099..3181100)  
 FT /label=NR34.51  
 FT /note=NR34.51, Exact (manual correction), [SBW25 April  
 05],Plate=P02, Coordinates=J6, Trace=q421, [UWGC]  
 FT /colour=7  
 FT misc\_feature 3246966..3246965  
 FT /label=NR54.M5.20  
 FT /note=NR54.M5.20, Exact (0), [SBW25 April 05],Plate=PM5.2,  
 Coordinates=F10, Trace=C621, [Oxford]  
 FT /colour=10  
 FT misc\_feature complement(3327501..3327502)  
 FT /label=NR12.M5.08  
 FT /note=NR12.M5.08, Exact (0), [SBW25 April 05],Plate=PM5.1,  
 Coordinates=D11, Trace=C530, [Oxford]  
 FT /colour=10

FT misc\_feature 3364000..3363999  
FT /label=NR41.43  
FT /note=NR41.43, Exact (0), [SBW25 April 05],Plate=P03,  
Coordinates=H13, Trace=q352, [UWGC]  
FT /colour=7  
FT misc\_feature 3364011..3364010  
FT /label=NR41.57  
FT /note=NR41.57, Exact (0), [SBW25 April 05],Plate=P03,  
Coordinates=J17, Trace=q369, [UWGC]  
FT /colour=7  
FT misc\_feature 3364011..3364010  
FT /label=NR41.80  
FT /note=NR41.80, Exact (0), [SBW25 April 05],Plate=P03,  
Coordinates=N15, Trace=q363, [UWGC]  
FT /colour=7  
FT misc\_feature 3364073..3364072  
FT /label=NR41.25  
FT /note=NR41.25, Estimate (30), [SBW25 April 05],Plate=P03,  
Coordinates=F1, Trace=q303, [UWGC]  
FT /colour=7  
FT misc\_feature 3364103..3364102  
FT /label=NR41.46  
FT /note=NR41.46, Exact (0), [SBW25 April 05],Plate=P03,  
Coordinates=H19, Trace=q376, [UWGC]  
FT /colour=7  
FT misc\_feature 3364113..3364112  
FT /label=NR35.70  
FT /note=NR35.70, Exact (manual correction), [SBW25 April  
05],Plate=P03, Coordinates=K19, Trace=q178, [UWGC]  
FT /colour=7  
FT misc\_feature 3364113..3364112  
FT /label=NR41.09  
FT /note=NR41.09, Exact (0), [SBW25 April 05],Plate=P03,  
Coordinates=B17, Trace=q365, [UWGC]  
FT /colour=7  
FT misc\_feature 3364113..3364112  
FT /label=NR41.27  
FT /note=NR41.27, Exact (0), [SBW25 April 05],Plate=P03,  
Coordinates=F5, Trace=q319, [UWGC]  
FT /colour=7  
FT misc\_feature 3364113..3364112  
FT /label=NR41.70  
FT /note=NR41.70, Exact (0), [SBW25 April 05],Plate=P03,  
Coordinates=L19, Trace=q378, [UWGC]  
FT /colour=7  
FT misc\_feature 3364113..3364112  
FT /label=NR41.72  
FT /note=NR41.72, Exact (0), [SBW25 April 05],Plate=P03,  
Coordinates=L23, Trace=q394, [UWGC]  
FT /colour=7  
FT misc\_feature 3364113..3364112  
FT /label=NR41.85  
FT /note=NR41.85, Exact (0), [SBW25 April 05],Plate=P03,  
Coordinates=P1, Trace=q308, [UWGC]  
FT /colour=7  
FT misc\_feature 3364114..3364115  
FT /label=NR41.50

FT /note=NR41.50, Exact (manual correction), UWGC re-mapped on  
dapB deleted genome, [SBW25 April 05],Plate=P03, Coordinates=J3, Trace=q313,  
[UWGC]  
FT /colour=7  
FT misc\_feature 3364115..3364114  
FT /label=NR41.21  
FT /note=NR41.21, Estimate (2), [SBW25 April 05],Plate=P03,  
Coordinates=D17, Trace=q366, [UWGC]  
FT /colour=7  
FT misc\_feature 3364142..3364141  
FT /label=NR41.54  
FT /note=NR41.54, Estimate (28), UWGC re-mapped on dapB  
deleted genome, [SBW25 April 05],Plate=P03, Coordinates=J11, Trace=q345, [UWGC]  
FT /colour=7  
FT misc\_feature 3364149..3364148  
FT /label=NR41.29  
FT /note=NR41.29, Exact (0), [SBW25 April 05],Plate=P03,  
Coordinates=F9, Trace=q335, [UWGC]  
FT /colour=7  
FT misc\_feature 3364149..3364148  
FT /label=NR41.34  
FT /note=NR41.34, Exact (0), [SBW25 April 05],Plate=P03,  
Coordinates=F19, Trace=q375, [UWGC]  
FT /colour=7  
FT misc\_feature 3364170..3364169  
FT /label=NR41.12  
FT /note=NR41.12, Estimate (0), [SBW25 April 05],Plate=P03,  
Coordinates=B23, Trace=q389, [UWGC]  
FT /colour=7  
FT misc\_feature 3364170..3364169  
FT /label=NR41.74  
FT /note=NR41.74, Exact (0), [SBW25 April 05],Plate=P03,  
Coordinates=N3, Trace=q315, [UWGC]  
FT /colour=7  
FT misc\_feature 3364226..3364225  
FT /label=NR41.47  
FT /note=NR41.47, Estimate (2), [SBW25 April 05],Plate=P03,  
Coordinates=H21, Trace=q384, [UWGC]  
FT /colour=7  
FT misc\_feature 3364228..3364227  
FT /label=NR41.05  
FT /note=NR41.05, Exact (0), [SBW25 April 05],Plate=P03,  
Coordinates=B9, Trace=q333, [UWGC]  
FT /colour=7  
FT misc\_feature 3364228..3364227  
FT /label=NR41.13  
FT /note=NR41.13, Exact (0), [SBW25 April 05],Plate=P03,  
Coordinates=D1, Trace=q302, [UWGC]  
FT /colour=7  
FT misc\_feature 3364228..3364227  
FT /label=NR41.30  
FT /note=NR41.30, Exact (0), [SBW25 April 05],Plate=P03,  
Coordinates=F11, Trace=q343, [UWGC]  
FT /colour=7  
FT misc\_feature 3364228..3364227  
FT /label=NR41.75



FT /note=NR41.75, Exact (0), [SBW25 April 05], Plate=P03,  
 Coordinates=N5, Trace=q323, [UWGC]  
 FT /colour=7  
 FT misc\_feature 3364228..3364227  
 FT /label=NR41.82  
 FT /note=NR41.82, Exact (0), [SBW25 April 05], Plate=P03,  
 Coordinates=N19, Trace=q379, [UWGC]  
 FT /colour=7  
 FT misc\_feature 3364230..3364231  
 FT /label=NR41.33  
 FT /note=NR41.33, Exact (manual correction), UWGC re-mapped on  
 dapB deleted genome, [SBW25 April 05], Plate=P03, Coordinates=F17, Trace=q367,  
 [UWGC]  
 FT /colour=7  
 FT misc\_feature 3364230..3364231  
 FT /label=NR41.93  
 FT /note=NR41.93, Exact (manual correction), UWGC re-mapped on  
 dapB deleted genome, [SBW25 April 05], Plate=P03, Coordinates=P17, Trace=q372,  
 [UWGC]  
 FT /colour=7  
 FT misc\_feature 3364233..3364232  
 FT /label=NR41.28  
 FT /note=NR41.28, Exact (0), [SBW25 April 05], Plate=P03,  
 Coordinates=F7, Trace=q327, [UWGC]  
 FT /colour=7  
 FT misc\_feature 3364233..3364232  
 FT /label=NR41.58  
 FT /note=NR41.58, Exact (0), [SBW25 April 05], Plate=P03,  
 Coordinates=J19, Trace=q377, [UWGC]  
 FT /colour=7  
 FT misc\_feature complement(3364233..3364234)  
 FT /label=NR41.49  
 FT /note=NR41.49, Estimate (0), [SBW25 April 05], Plate=P03,  
 Coordinates=J1, Trace=q305, [UWGC]  
 FT /colour=7  
 FT misc\_feature complement(3364234..3364235)  
 FT /label=NR41.52  
 FT /note=NR41.52, Exact (0), [SBW25 April 05], Plate=P03,  
 Coordinates=J7, Trace=q329, [UWGC]  
 FT /colour=7  
 FT misc\_feature complement(3364234..3364235)  
 FT /label=NR41.56  
 FT /note=NR41.56, Exact (0), [SBW25 April 05], Plate=P03,  
 Coordinates=J15, Trace=q361, [UWGC]  
 FT /colour=7  
 FT misc\_feature complement(3364239..3364240)  
 FT /label=NR41.23  
 FT /note=NR41.23, Estimate (2), [SBW25 April 05], Plate=P03,  
 Coordinates=D21, Trace=q382, [UWGC]  
 FT /colour=7  
 FT misc\_feature complement(3364239..3364240)  
 FT /label=NR41.37  
 FT /note=NR41.37, Estimate (2), [SBW25 April 05], Plate=P03,  
 Coordinates=H1, Trace=q304, [UWGC]  
 FT /colour=7  
 FT misc\_feature complement(3364239..3364240)  
 FT /label=NR41.44

FT /note=NR41.44, Estimate (2), [SBW25 April 05],Plate=P03,  
 Coordinates=H15, Trace=q360, [UWGC]  
 FT /colour=7  
 FT misc\_feature complement(3364244..3364245)  
 FT /label=NR41.79  
 FT /note=NR41.79, Exact (0), [SBW25 April 05],Plate=P03,  
 Coordinates=N13, Trace=q355, [UWGC]  
 FT /colour=7  
 FT misc\_feature complement(3364248..3364249)  
 FT /label=NR41.10  
 FT /note=NR41.10, Estimate (0), [SBW25 April 05],Plate=P03,  
 Coordinates=B19, Trace=q373, [UWGC]  
 FT /colour=7  
 FT misc\_feature complement(3364249..3364250)  
 FT /label=NR41.69  
 FT /note=NR41.69, Exact (0), [SBW25 April 05],Plate=P03,  
 Coordinates=L17, Trace=q370, [UWGC]  
 FT /colour=7  
 FT misc\_feature 3364252..3364251  
 FT /label=NR41.60  
 FT /note=NR41.60, Exact (0), [SBW25 April 05],Plate=P03,  
 Coordinates=J23, Trace=q393, [UWGC]  
 FT /colour=7  
 FT misc\_feature 3364253..3364254  
 FT /label=NR41.39  
 FT /note=NR41.39, Exact (manual correction), UWGC re-mapped on  
 dapB deleted genome, [SBW25 April 05],Plate=P03, Coordinates=H5, Trace=q320,  
 [UWGC]  
 FT /colour=7  
 FT misc\_feature complement(3364266..3364267)  
 FT /label=NR41.78  
 FT /note=NR41.78, Estimate (27), [SBW25 April 05],Plate=P03,  
 Coordinates=N11, Trace=q347, [UWGC]  
 FT /colour=7  
 FT misc\_feature complement(3364267..3364268)  
 FT /label=NR41.07  
 FT /note=NR41.07, Estimate (28), [SBW25 April 05],Plate=P03,  
 Coordinates=B13, Trace=q349, [UWGC]  
 FT /colour=7  
 FT misc\_feature complement(3364267..3364268)  
 FT /label=NR41.15  
 FT /note=NR41.15, Estimate (28), [SBW25 April 05],Plate=P03,  
 Coordinates=D5, Trace=q318, [UWGC]  
 FT /colour=7  
 FT misc\_feature complement(3364273..3364274)  
 FT /label=NR41.77  
 FT /note=NR41.77, Estimate (28), [SBW25 April 05],Plate=P03,  
 Coordinates=N9, Trace=q339, [UWGC]  
 FT /colour=7  
 FT misc\_feature 3364306..3364305  
 FT /label=NR41.67  
 FT /note=NR41.67, Estimate (33), UWGC re-mapped on dapB  
 deleted genome, [SBW25 April 05],Plate=P03, Coordinates=L13, Trace=q354, [UWGC]  
 FT /colour=7  
 FT misc\_feature 3364333..3364332  
 FT /label=NR41.71

FT /note=NR41.71, Estimate (0), [SBW25 April 05],Plate=P03,  
Coordinates=L21, Trace=q386, [UWGC]  
FT /colour=7  
FT misc\_feature 3364342..3364341  
FT /label=NR41.22  
FT /note=NR41.22, Exact (0), [SBW25 April 05],Plate=P03,  
Coordinates=D19, Trace=q374, [UWGC]  
FT /colour=7  
FT misc\_feature 3364371..3364370  
FT /label=NR41.16  
FT /note=NR41.16, Estimate (0), [SBW25 April 05],Plate=P03,  
Coordinates=D7, Trace=q326, [UWGC]  
FT /colour=7  
FT misc\_feature complement(3364371..3364372)  
FT /label=NR41.35  
FT /note=NR41.35, Estimate (35), [SBW25 April 05],Plate=P03,  
Coordinates=F21, Trace=q383, [UWGC]  
FT /colour=7  
FT misc\_feature complement(3364385..3364386)  
FT /label=NR41.68  
FT /note=NR41.68, Estimate (34), [SBW25 April 05],Plate=P03,  
Coordinates=L15, Trace=q362, [UWGC]  
FT /colour=7  
FT misc\_feature 3364396..3364395  
FT /label=NR41.04  
FT /note=NR41.04, Estimate (29), UWGC re-mapped on dapB  
deleted genome, [SBW25 April 05],Plate=P03, Coordinates=B7, Trace=q325, [UWGC]  
FT /colour=7  
FT misc\_feature 3364397..3364396  
FT /label=NR41.83  
FT /note=NR41.83, Estimate (26), UWGC re-mapped on dapB  
deleted genome, [SBW25 April 05],Plate=P03, Coordinates=N21, Trace=q387, [UWGC]  
FT /colour=7  
FT misc\_feature 3364398..3364397  
FT /label=NR41.86  
FT /note=NR41.86, Estimate (27), UWGC re-mapped on dapB  
deleted genome, [SBW25 April 05],Plate=P03, Coordinates=P3, Trace=q316, [UWGC]  
FT /colour=7  
FT misc\_feature 3364399..3364398  
FT /label=NR41.66  
FT /note=NR41.66, Exact (0), UWGC re-mapped on dapB deleted  
genome, [SBW25 April 05],Plate=P03, Coordinates=L11, Trace=q346, [UWGC]  
FT /colour=7  
FT misc\_feature 3364399..3364398  
FT /label=NR41.89  
FT /note=NR41.89, Exact (0), UWGC re-mapped on dapB deleted  
genome, [SBW25 April 05],Plate=P03, Coordinates=P9, Trace=q340, [UWGC]  
FT /colour=7  
FT misc\_feature 3364399..3364398  
FT /label=NR41.96  
FT /note=NR41.96, Exact (0), UWGC re-mapped on dapB deleted  
genome, [SBW25 April 05],Plate=P03, Coordinates=P23, Trace=q396, [UWGC]  
FT /colour=7  
FT misc\_feature 3364399..3364398  
FT /label=NR41.M5.05  
FT /note=NR41.M5.05, Exact (0), [SBW25 April 05],Plate=PM5.2,  
Coordinates=A11, Trace=C624, [Oxford]

FT /colour=10  
 FT misc\_feature 3364399..3364398  
 FT /label=NR41.M5.08  
 FT /note=NR41.M5.08, Exact (0), [SBW25 April 05],Plate=PM5.2,  
 Coordinates=B2, Trace=C553, [Oxford]  
 FT /colour=10  
 FT misc\_feature 3364399..3364398  
 FT /label=NR41.M5.09  
 FT /note=NR41.M5.09, Exact (0), [SBW25 April 05],Plate=PM5.2,  
 Coordinates=B3, Trace=C561, [Oxford]  
 FT /colour=10  
 FT misc\_feature 3364399..3364398  
 FT /label=NR41.M5.10  
 FT /note=NR41.M5.10, Exact (0), [SBW25 April 05],Plate=PM5.2,  
 Coordinates=B4, Trace=C569, [Oxford]  
 FT /colour=10  
 FT misc\_feature complement(3364409..3364410)  
 FT /label=NR41.45  
 FT /note=NR41.45, Exact (0), [SBW25 April 05],Plate=P03,  
 Coordinates=H17, Trace=q368, [UWGC]  
 FT /colour=7  
 FT misc\_feature complement(3364409..3364410)  
 FT /label=NR41.81  
 FT /note=NR41.81, Estimate (0), [SBW25 April 05],Plate=P03,  
 Coordinates=N17, Trace=q371, [UWGC]  
 FT /colour=7  
 FT misc\_feature complement(3364410..3364411)  
 FT /label=NR41.19  
 FT /note=NR41.19, Estimate (28), [SBW25 April 05],Plate=P03,  
 Coordinates=D13, Trace=q350, [UWGC]  
 FT /colour=7  
 FT misc\_feature complement(3364410..3364411)  
 FT /label=NR41.48  
 FT /note=NR41.48, Exact (0), [SBW25 April 05],Plate=P03,  
 Coordinates=H23, Trace=q392, [UWGC]  
 FT /colour=7  
 FT misc\_feature complement(3364410..3364411)  
 FT /label=NR41.91  
 FT /note=NR41.91, Exact (0), [SBW25 April 05],Plate=P03,  
 Coordinates=P13, Trace=q356, [UWGC]  
 FT /colour=7  
 FT misc\_feature complement(3364411..3364412)  
 FT /label=NR41.01  
 FT /note=NR41.01, Estimate (59), [SBW25 April 05],Plate=P03,  
 Coordinates=B1, Trace=q301, [UWGC]  
 FT /colour=7  
 FT misc\_feature 3364415..3364414  
 FT /label=NR41.14  
 FT /note=NR41.14, Exact (manual correction), [SBW25 April  
 05],Plate=P03, Coordinates=D3, Trace=q310, [UWGC]  
 FT /colour=7  
 FT misc\_feature 3364415..3364414  
 FT /label=NR41.17  
 FT /note=NR41.17, Exact (0), UWGC re-mapped on dapB deleted  
 genome, [SBW25 April 05],Plate=P03, Coordinates=D9, Trace=q334, [UWGC]  
 FT /colour=7  
 FT misc\_feature 3364415..3364414

FT /label=NR41.41  
 FT /note=NR41.41, Exact (0), UWGC re-mapped on dapB deleted  
 genome, [SBW25 April 05],Plate=P03, Coordinates=H9, Trace=q336, [UWGC]  
 FT /colour=7  
 FT misc\_feature 3364415..3364414  
 FT /label=NR41.88  
 FT /note=NR41.88, Exact (0), UWGC re-mapped on dapB deleted  
 genome, [SBW25 April 05],Plate=P03, Coordinates=P7, Trace=q332, [UWGC]  
 FT /colour=7  
 FT misc\_feature 3364415..3364414  
 FT /label=NR41.M5.07  
 FT /note=NR41.M5.07, Exact (0), [SBW25 April 05],Plate=PM5.2,  
 Coordinates=B1, Trace=C545, [Oxford]  
 FT /colour=10  
 FT misc\_feature complement(3364415..3364416)  
 FT /label=NR41.08  
 FT /note=NR41.08, Exact (0), [SBW25 April 05],Plate=P03,  
 Coordinates=B15, Trace=q357, [UWGC]  
 FT /colour=7  
 FT misc\_feature 3364416..3364415  
 FT /label=NR41.53  
 FT /note=NR41.53, Estimate (0), UWGC re-mapped on dapB deleted  
 genome, [SBW25 April 05],Plate=P03, Coordinates=J9, Trace=q337, [UWGC]  
 FT /colour=7  
 FT misc\_feature 3364425..3364424  
 FT /label=NR41.92  
 FT /note=NR41.92, Exact (0), UWGC re-mapped on dapB deleted  
 genome, [SBW25 April 05],Plate=P03, Coordinates=P15, Trace=q364, [UWGC]  
 FT /colour=7  
 FT misc\_feature 3364426..3364425  
 FT /label=NR41.32  
 FT /note=NR41.32, Estimate (0), UWGC re-mapped on dapB deleted  
 genome, [SBW25 April 05],Plate=P03, Coordinates=F15, Trace=q359, [UWGC]  
 FT /colour=7  
 FT misc\_feature complement(3364426..3364427)  
 FT /label=NR41.51  
 FT /note=NR41.51, Exact (manual correction), [SBW25 April  
 05],Plate=P03, Coordinates=J5, Trace=q321, [UWGC]  
 FT /colour=7  
 FT misc\_feature complement(3364426..3364427)  
 FT /label=NR41.95  
 FT /note=NR41.95, Exact (0), [SBW25 April 05],Plate=P03,  
 Coordinates=P21, Trace=q388, [UWGC]  
 FT /colour=7  
 FT misc\_feature 3364429..3364428  
 FT /label=NR41.59  
 FT /note=NR41.59, Exact (manual correction), [SBW25 April  
 05],Plate=P03, Coordinates=J21, Trace=q385, [UWGC]  
 FT /colour=7  
 FT misc\_feature 3364434..3364435  
 FT /label=NR41.42  
 FT /note=NR41.42, Exact (manual correction), UWGC re-mapped on  
 dapB deleted genome, [SBW25 April 05],Plate=P03, Coordinates=H11, Trace=q344,  
 [UWGC]  
 FT /colour=7  
 FT misc\_feature complement(3364434..3364435)  
 FT /label=NR41.90

FT /note=NR41.90, Exact (0), [SBW25 April 05],Plate=P03,  
 Coordinates=P11, Trace=q348, [UWGC]  
 FT /colour=7  
 FT misc\_feature complement(3364434..3364435)  
 FT /label=NR41.94  
 FT /note=NR41.94, Exact (0), [SBW25 April 05],Plate=P03,  
 Coordinates=P19, Trace=q380, [UWGC]  
 FT /colour=7  
 FT misc\_feature complement(3364440..3364441)  
 FT /label=NR41.76  
 FT /note=NR41.76, Estimate (29), [SBW25 April 05],Plate=P03,  
 Coordinates=N7, Trace=q331, [UWGC]  
 FT /colour=7  
 FT misc\_feature complement(3364441..3364442)  
 FT /label=NR41.06  
 FT /note=NR41.06, Estimate (30), [SBW25 April 05],Plate=P03,  
 Coordinates=B11, Trace=q341, [UWGC]  
 FT /colour=7  
 FT misc\_feature complement(3364443..3364444)  
 FT /label=NR41.38  
 FT /note=NR41.38, Estimate (102), UWGC re-mapped on dapB  
 deleted genome, [SBW25 April 05],Plate=P03, Coordinates=H3, Trace=q312, [UWGC]  
 FT /colour=7  
 FT misc\_feature complement(3364443..3364444)  
 FT /label=NR41.87  
 FT /note=NR41.87, Estimate (32), [SBW25 April 05],Plate=P03,  
 Coordinates=P5, Trace=q324, [UWGC]  
 FT /colour=7  
 FT misc\_feature complement(3364444..3364445)  
 FT /label=NR41.03  
 FT /note=NR41.03, Estimate (33), [SBW25 April 05],Plate=P03,  
 Coordinates=B5, Trace=q317, [UWGC]  
 FT /colour=7  
 FT misc\_feature complement(3364444..3364445)  
 FT /label=NR41.24  
 FT /note=NR41.24, Estimate (33), [SBW25 April 05],Plate=P03,  
 Coordinates=D23, Trace=q390, [UWGC]  
 FT /colour=7  
 FT misc\_feature complement(3364444..3364445)  
 FT /label=NR41.84  
 FT /note=NR41.84, Estimate (33), [SBW25 April 05],Plate=P03,  
 Coordinates=N23, Trace=q395, [UWGC]  
 FT /colour=7  
 FT misc\_feature 3364446..3364445  
 FT /label=NR41.73  
 FT /note=NR41.73, Exact (manual correction), [SBW25 April  
 05],Plate=P03, Coordinates=N1, Trace=q307, [UWGC]  
 FT /colour=7  
 FT misc\_feature 3364447..3364446  
 FT /label=NR41.65  
 FT /note=NR41.65, Exact (manual correction), [SBW25 April  
 05],Plate=P03, Coordinates=L9, Trace=q338, [UWGC]  
 FT /colour=7  
 FT misc\_feature 3364452..3364451  
 FT /label=NR41.55  
 FT /note=NR41.55, Exact (manual correction), [SBW25 April  
 05],Plate=P03, Coordinates=J13, Trace=q353, [UWGC]

FT /colour=7  
 FT misc\_feature 3364452..3364451  
 FT /label=NR41.M5.03  
 FT /note=NR41.M5.03, Exact (0), [SBW25 April 05],Plate=PM5.2,  
 Coordinates=A9, Trace=C608, [Oxford]  
 FT /colour=10  
 FT misc\_feature 3364454..3364455  
 FT /label=NR41.63  
 FT /note=NR41.63, Exact (manual correction), UWGC re-mapped on  
 dapB deleted genome, [SBW25 April 05],Plate=P03, Coordinates=L5, Trace=q322,  
 [UWGC]  
 FT /colour=7  
 FT misc\_feature 3364458..3364457  
 FT /label=NR41.M5.06  
 FT /note=NR41.M5.06,MCS hit  
 =^GATCTGCAGGTCGAGCGCTTAATTAAGTAGTCGAGTTGGGTATG, [SBW25 April 05],Plate=PM5.2,  
 Coordinates=A12, Trace=C632, [Oxford]  
 FT /colour=10  
 FT misc\_feature 3393571..3393570  
 FT /label=NR54.M5.11  
 FT /note=NR54.M5.11, Exact (0), [SBW25 April 05],Plate=PM5.2,  
 Coordinates=F1, Trace=C549, [Oxford]  
 FT /colour=10  
 FT misc\_feature complement(3401457..3401458)  
 FT /label=NR09.53  
 FT /note=NR09.53, Estimate (43), [SBW25 April 05],Plate=P07,  
 Coordinates=O06, Trace=q224, [UWGC]  
 FT /colour=7  
 FT misc\_feature complement(3435508..3435509)  
 FT /label=NR12.84  
 FT /note=NR12.84, Estimate (37), [SBW25 April 05],Plate=P01,  
 Coordinates=M24, Trace=q295, [UWGC]  
 FT /colour=7  
 FT misc\_feature 3442801..3442800  
 FT /label=NR12.P01  
 FT /note=NR12.P01, Exact (0), [SBW25 April 05],Plate=P06,  
 Coordinates=M1, Trace=q107, [UWGC]  
 FT /colour=7  
 FT misc\_feature complement(3456640..3456641)  
 FT /label=NR54.103  
 FT /note=NR54.103, Exact (0), [SBW25 April 05],Plate=P07,  
 Coordinates=D23, Trace=q390, [UWGC]  
 FT /colour=7  
 FT misc\_feature complement(3468239..3468240)  
 FT /label=NR55.M5.16  
 FT /note=NR55.M5.16, Exact (0), [SBW25 April 05],Plate=PM5.2,  
 Coordinates=H3, Trace=C567, [Oxford]  
 FT /colour=10  
 FT misc\_feature complement(3511701..3511702)  
 FT /label=NR12.67  
 FT /note=NR12.67, Exact (0), [SBW25 April 05],Plate=P01,  
 Coordinates=K14, Trace=q254, [UWGC]  
 FT /colour=7  
 FT misc\_feature 3540397..3540396  
 FT /label=NR54.P03  
 FT /note=NR54.P03, Exact (manual correction), [SBW25 April  
 05],Plate=P06, Coordinates=A17, Trace=q165, [UWGC]

FT /colour=7  
 FT misc\_feature complement(3671629..3671630)  
 FT /label=NR31.50  
 FT /note=NR31.50, Exact (0), [SBW25 April 05],Plate=P02,  
 Coordinates=I3, Trace=q113, [UWGC]  
 FT /colour=7  
 FT misc\_feature 3671646..3671647  
 FT /label=NR31.38  
 FT /note=NR31.38, Estimate (40), [SBW25 April 05],Plate=P02,  
 Coordinates=G3, Trace=q112, [UWGC]  
 FT /colour=7  
 FT misc\_feature complement(3671679..3671680)  
 FT /label=NR31.39  
 FT /note=NR31.39, Estimate (28), [SBW25 April 05],Plate=P02,  
 Coordinates=G5, Trace=q120, [UWGC]  
 FT /colour=7  
 FT misc\_feature complement(3671680..3671681)  
 FT /label=NR31.52  
 FT /note=NR31.52, Estimate (0), [SBW25 April 05],Plate=P02,  
 Coordinates=I7, Trace=q129, [UWGC]  
 FT /colour=7  
 FT misc\_feature complement(3671694..3671695)  
 FT /label=NR31.96  
 FT /note=NR31.96, Estimate (24), [SBW25 April 05],Plate=P02,  
 Coordinates=O23, Trace=q196, [UWGC]  
 FT /colour=7  
 FT misc\_feature complement(3671731..3671732)  
 FT /label=NR31.11  
 FT /note=NR31.11, Exact (0), [SBW25 April 05],Plate=P02,  
 Coordinates=A21, Trace=q181, [UWGC]  
 FT /colour=7  
 FT misc\_feature complement(3671737..3671738)  
 FT /label=NR31.88  
 FT /note=NR31.88, Estimate (1), [SBW25 April 05],Plate=P02,  
 Coordinates=O7, Trace=q132, [UWGC]  
 FT /colour=7  
 FT misc\_feature complement(3671765..3671766)  
 FT /label=NR31.85  
 FT /note=NR31.85, Estimate (27), [SBW25 April 05],Plate=P02,  
 Coordinates=O1, Trace=q108, [UWGC]  
 FT /colour=7  
 FT misc\_feature complement(3671788..3671789)  
 FT /label=NR31.82  
 FT /note=NR31.82, Exact (0), [SBW25 April 05],Plate=P02,  
 Coordinates=M19, Trace=q179, [UWGC]  
 FT /colour=7  
 FT misc\_feature 3671789..3671788  
 FT /label=NR31.87  
 FT /note=NR31.87, Estimate (28), UWGC re-mapped on dapB  
 deleted genome, [SBW25 April 05],Plate=P02, Coordinates=O5, Trace=q124, [UWGC]  
 FT /colour=7  
 FT misc\_feature complement(3671797..3671798)  
 FT /label=NR31.16  
 FT /note=NR31.16, Estimate (0), [SBW25 April 05],Plate=P02,  
 Coordinates=C7, Trace=q126, [UWGC]  
 FT /colour=7  
 FT misc\_feature complement(3671798..3671799)



FT /label=NR31.06  
FT /note=NR31.06, Exact (0), [SBW25 April 05],Plate=P02,  
Coordinates=A11, Trace=q141, [UWGC]  
FT /colour=7  
FT misc\_feature complement(3671807..3671808)  
FT /label=NR31.29  
FT /note=NR31.29, Estimate (0), [SBW25 April 05],Plate=P02,  
Coordinates=E9, Trace=q135, [UWGC]  
FT /colour=7  
FT misc\_feature complement(3671808..3671809)  
FT /label=NR31.49  
FT /note=NR31.49, Exact (0), [SBW25 April 05],Plate=P02,  
Coordinates=I1, Trace=q105, [UWGC]  
FT /colour=7  
FT misc\_feature complement(3671808..3671809)  
FT /label=NR31.90  
FT /note=NR31.90, Exact (0), [SBW25 April 05],Plate=P02,  
Coordinates=O11, Trace=q148, [UWGC]  
FT /colour=7  
FT misc\_feature complement(3671811..3671812)  
FT /label=NR31.63  
FT /note=NR31.63, Estimate (27), [SBW25 April 05],Plate=P02,  
Coordinates=K5, Trace=q122, [UWGC]  
FT /colour=7  
FT misc\_feature complement(3671813..3671814)  
FT /label=NR31.23  
FT /note=NR31.23, Exact (0), [SBW25 April 05],Plate=P02,  
Coordinates=C21, Trace=q182, [UWGC]  
FT /colour=7  
FT misc\_feature complement(3671813..3671814)  
FT /label=NR31.40  
FT /note=NR31.40, Exact (0), [SBW25 April 05],Plate=P02,  
Coordinates=G7, Trace=q128, [UWGC]  
FT /colour=7  
FT misc\_feature complement(3671814..3671815)  
FT /label=NR31.89  
FT /note=NR31.89, Exact (0), [SBW25 April 05],Plate=P02,  
Coordinates=O9, Trace=q140, [UWGC]  
FT /colour=7  
FT misc\_feature complement(3671814..3671815)  
FT /label=NR42.86  
FT /note=NR42.86, Exact (0), [SBW25 April 05],Plate=P03,  
Coordinates=P4, Trace=q416, [UWGC]  
FT /colour=7  
FT misc\_feature 3671817..3671816  
FT /label=NR31.74  
FT /note=NR31.74, Estimate (2), [SBW25 April 05],Plate=P02,  
Coordinates=M3, Trace=q115, [UWGC]  
FT /colour=7  
FT misc\_feature complement(3671817..3671818)  
FT /label=NR31.62  
FT /note=NR31.62, Estimate (0), [SBW25 April 05],Plate=P02,  
Coordinates=K3, Trace=q114, [UWGC]  
FT /colour=7  
FT misc\_feature complement(3671819..3671820)  
FT /label=NR31.27

FT /note=NR31.27, Exact (0), [SBW25 April 05],Plate=P02,  
Coordinates=E5, Trace=q119, [UWGC]  
FT /colour=7  
FT misc\_feature complement(3671827..3671828)  
FT /label=NR31.57  
FT /note=NR31.57, Estimate (0), [SBW25 April 05],Plate=P02,  
Coordinates=I17, Trace=q169, [UWGC]  
FT /colour=7  
FT misc\_feature complement(3671828..3671829)  
FT /label=NR31.17  
FT /note=NR31.17, Exact (0), [SBW25 April 05],Plate=P02,  
Coordinates=C9, Trace=q134, [UWGC]  
FT /colour=7  
FT misc\_feature complement(3671828..3671829)  
FT /label=NR31.42  
FT /note=NR31.42, Exact (0), [SBW25 April 05],Plate=P02,  
Coordinates=G11, Trace=q144, [UWGC]  
FT /colour=7  
FT misc\_feature complement(3671828..3671829)  
FT /label=NR31.71  
FT /note=NR31.71, Exact (0), [SBW25 April 05],Plate=P02,  
Coordinates=K21, Trace=q186, [UWGC]  
FT /colour=7  
FT misc\_feature complement(3671830..3671831)  
FT /label=NR31.28  
FT /note=NR31.28, Estimate (31), [SBW25 April 05],Plate=P02,  
Coordinates=E7, Trace=q127, [UWGC]  
FT /colour=7  
FT misc\_feature complement(3671832..3671833)  
FT /label=NR31.80  
FT /note=NR31.80, Estimate (33), [SBW25 April 05],Plate=P02,  
Coordinates=M15, Trace=q163, [UWGC]  
FT /colour=7  
FT misc\_feature complement(3671833..3671834)  
FT /label=NR31.03  
FT /note=NR31.03, Exact (0), [SBW25 April 05],Plate=P02,  
Coordinates=A5, Trace=q117, [UWGC]  
FT /colour=7  
FT misc\_feature complement(3671833..3671834)  
FT /label=NR31.07  
FT /note=NR31.07, Exact (0), [SBW25 April 05],Plate=P02,  
Coordinates=A13, Trace=q149, [UWGC]  
FT /colour=7  
FT misc\_feature complement(3671833..3671834)  
FT /label=NR31.14  
FT /note=NR31.14, Exact (0), [SBW25 April 05],Plate=P02,  
Coordinates=C3, Trace=q110, [UWGC]  
FT /colour=7  
FT misc\_feature complement(3671833..3671834)  
FT /label=NR31.22  
FT /note=NR31.22, Exact (0), [SBW25 April 05],Plate=P02,  
Coordinates=C19, Trace=q174, [UWGC]  
FT /colour=7  
FT misc\_feature complement(3671833..3671834)  
FT /label=NR31.30  
FT /note=NR31.30, Exact (0), [SBW25 April 05],Plate=P02,  
Coordinates=E11, Trace=q143, [UWGC]

FT /colour=7  
FT misc\_feature complement(3671833..3671834)  
FT /label=NR31.45  
FT /note=NR31.45, Exact (0), [SBW25 April 05],Plate=P02,  
Coordinates=G17, Trace=q168, [UWGC]  
FT /colour=7  
FT misc\_feature complement(3671833..3671834)  
FT /label=NR31.64  
FT /note=NR31.64, Exact (0), [SBW25 April 05],Plate=P02,  
Coordinates=K7, Trace=q130, [UWGC]  
FT /colour=7  
FT misc\_feature complement(3671833..3671834)  
FT /label=NR31.68  
FT /note=NR31.68, Exact (0), [SBW25 April 05],Plate=P02,  
Coordinates=K15, Trace=q162, [UWGC]  
FT /colour=7  
FT misc\_feature complement(3671833..3671834)  
FT /label=NR31.76  
FT /note=NR31.76, Exact (0), [SBW25 April 05],Plate=P02,  
Coordinates=M7, Trace=q131, [UWGC]  
FT /colour=7  
FT misc\_feature complement(3671833..3671834)  
FT /label=NR31.81  
FT /note=NR31.81, Exact (0), [SBW25 April 05],Plate=P02,  
Coordinates=M17, Trace=q171, [UWGC]  
FT /colour=7  
FT misc\_feature complement(3671833..3671834)  
FT /label=NR31.93  
FT /note=NR31.93, Exact (0), [SBW25 April 05],Plate=P02,  
Coordinates=O17, Trace=q172, [UWGC]  
FT /colour=7  
FT misc\_feature complement(3671833..3671834)  
FT /label=NR42.28  
FT /note=NR42.28, Exact (0), [SBW25 April 05],Plate=P03,  
Coordinates=F8, Trace=q427, [UWGC]  
FT /colour=7  
FT misc\_feature complement(3671833..3671834)  
FT /label=NR42.81  
FT /note=NR42.81, Exact (0), [SBW25 April 05],Plate=P03,  
Coordinates=N18, Trace=q471, [UWGC]  
FT /colour=7  
FT misc\_feature complement(3671834..3671835)  
FT /label=NR31.94  
FT /note=NR31.94, Estimate (1), [SBW25 April 05],Plate=P02,  
Coordinates=O19, Trace=q180, [UWGC]  
FT /colour=7  
FT misc\_feature complement(3671834..3671835)  
FT /label=NR33.07  
FT /note=NR33.07, Estimate (54), [SBW25 April 05],Plate=P02,  
Coordinates=B13, Trace=q349, [UWGC]  
FT /colour=7  
FT misc\_feature complement(3671838..3671839)  
FT /label=NR31.41  
FT /note=NR31.41, Exact (0), [SBW25 April 05],Plate=P02,  
Coordinates=G9, Trace=q136, [UWGC]  
FT /colour=7  
FT misc\_feature complement(3671840..3671841)

FT /label=NR31.72  
FT /note=NR31.72, Estimate (26), [SBW25 April 05],Plate=P02,  
Coordinates=K23, Trace=q194, [UWGC]  
FT /colour=7  
FT misc\_feature 3671841..3671840  
FT /label=NR31.54  
FT /note=NR31.54, Estimate (27), UWGC re-mapped on dapB  
deleted genome, [SBW25 April 05],Plate=P02, Coordinates=I11, Trace=q145, [UWGC]  
FT /colour=7  
FT misc\_feature complement(3671841..3671842)  
FT /label=NR31.48  
FT /note=NR31.48, Estimate (32), [SBW25 April 05],Plate=P02,  
Coordinates=G23, Trace=q192, [UWGC]  
FT /colour=7  
FT misc\_feature complement(3671857..3671858)  
FT /label=NR31.69  
FT /note=NR31.69, Exact (0), [SBW25 April 05],Plate=P02,  
Coordinates=K17, Trace=q170, [UWGC]  
FT /colour=7  
FT misc\_feature complement(3671857..3671858)  
FT /label=NR31.73  
FT /note=NR31.73, Exact (0), [SBW25 April 05],Plate=P02,  
Coordinates=M1, Trace=q107, [UWGC]  
FT /colour=7  
FT misc\_feature complement(3671862..3671863)  
FT /label=NR31.35  
FT /note=NR31.35, Estimate (29), [SBW25 April 05],Plate=P02,  
Coordinates=E21, Trace=q183, [UWGC]  
FT /colour=7  
FT misc\_feature complement(3671865..3671866)  
FT /label=NR31.84  
FT /note=NR31.84, Estimate (32), [SBW25 April 05],Plate=P02,  
Coordinates=M23, Trace=q195, [UWGC]  
FT /colour=7  
FT misc\_feature complement(3671875..3671876)  
FT /label=NR31.33  
FT /note=NR31.33, Exact (0), [SBW25 April 05],Plate=P02,  
Coordinates=E17, Trace=q167, [UWGC]  
FT /colour=7  
FT misc\_feature complement(3671876..3671877)  
FT /label=NR31.47  
FT /note=NR31.47, Estimate (47), [SBW25 April 05],Plate=P02,  
Coordinates=G21, Trace=q184, [UWGC]  
FT /colour=7  
FT misc\_feature complement(3671879..3671880)  
FT /label=NR31.79  
FT /note=NR31.79, Exact (0), [SBW25 April 05],Plate=P02,  
Coordinates=M13, Trace=q155, [UWGC]  
FT /colour=7  
FT misc\_feature complement(3671879..3671880)  
FT /label=NR31.91  
FT /note=NR31.91, Exact (0), [SBW25 April 05],Plate=P02,  
Coordinates=O13, Trace=q156, [UWGC]  
FT /colour=7  
FT misc\_feature complement(3671886..3671887)  
FT /label=NR31.13

FT /note=NR31.13, Exact (0), [SBW25 April 05],Plate=P02,  
Coordinates=C1, Trace=q102, [UWGC]  
FT /colour=7  
FT misc\_feature complement(3671891..3671892)  
FT /label=NR31.21  
FT /note=NR31.21, Exact (0), [SBW25 April 05],Plate=P02,  
Coordinates=C17, Trace=q166, [UWGC]  
FT /colour=7  
FT misc\_feature complement(3671899..3671900)  
FT /label=NR31.10  
FT /note=NR31.10, Estimate (20), [SBW25 April 05],Plate=P02,  
Coordinates=A19, Trace=q173, [UWGC]  
FT /colour=7  
FT misc\_feature complement(3671921..3671922)  
FT /label=NR31.05  
FT /note=NR31.05, Exact (0), [SBW25 April 05],Plate=P02,  
Coordinates=A9, Trace=q133, [UWGC]  
FT /colour=7  
FT misc\_feature complement(3671922..3671923)  
FT /label=NR31.46  
FT /note=NR31.46, Estimate (1), [SBW25 April 05],Plate=P02,  
Coordinates=G19, Trace=q176, [UWGC]  
FT /colour=7  
FT misc\_feature complement(3671933..3671934)  
FT /label=NR31.56  
FT /note=NR31.56, Exact (0), [SBW25 April 05],Plate=P02,  
Coordinates=I15, Trace=q161, [UWGC]  
FT /colour=7  
FT misc\_feature complement(3671933..3671934)  
FT /label=NR31.70  
FT /note=NR31.70, Estimate (3), [SBW25 April 05],Plate=P02,  
Coordinates=K19, Trace=q178, [UWGC]  
FT /colour=7  
FT misc\_feature complement(3671949..3671950)  
FT /label=NR31.92  
FT /note=NR31.92, Estimate (32), [SBW25 April 05],Plate=P02,  
Coordinates=O15, Trace=q164, [UWGC]  
FT /colour=7  
FT misc\_feature complement(3671950..3671951)  
FT /label=NR31.24  
FT /note=NR31.24, Estimate (27), [SBW25 April 05],Plate=P02,  
Coordinates=C23, Trace=q190, [UWGC]  
FT /colour=7  
FT misc\_feature complement(3671950..3671951)  
FT /label=NR31.66  
FT /note=NR31.66, Estimate (0), [SBW25 April 05],Plate=P02,  
Coordinates=K11, Trace=q146, [UWGC]  
FT /colour=7  
FT misc\_feature complement(3671950..3671951)  
FT /label=NR31.95  
FT /note=NR31.95, Estimate (42), [SBW25 April 05],Plate=P02,  
Coordinates=O21, Trace=q188, [UWGC]  
FT /colour=7  
FT misc\_feature complement(3671951..3671952)  
FT /label=NR31.55  
FT /note=NR31.55, Estimate (72), [SBW25 April 05],Plate=P02,  
Coordinates=I13, Trace=q153, [UWGC]

FT /colour=7  
 FT misc\_feature 3671956..3671955  
 FT /label=NR31.59  
 FT /note=NR31.59, Estimate (27), UWGC re-mapped on dapB  
 deleted genome, [SBW25 April 05],Plate=P02, Coordinates=I21, Trace=q185, [UWGC]  
 FT /colour=7  
 FT misc\_feature complement(3671960..3671961)  
 FT /label=NR31.61  
 FT /note=NR31.61, Estimate (23), [SBW25 April 05],Plate=P02,  
 Coordinates=K1, Trace=q106, [UWGC]  
 FT /colour=7  
 FT misc\_feature complement(3671967..3671968)  
 FT /label=NR31.32  
 FT /note=NR31.32, Exact (0), [SBW25 April 05],Plate=P02,  
 Coordinates=E15, Trace=q159, [UWGC]  
 FT /colour=7  
 FT misc\_feature 3671983..3671982  
 FT /label=NR31.M5.04  
 FT /note=NR31.M5.04, Exact (0), [SBW25 April 05],Plate=PM5.1,  
 Coordinates=F10, Trace=C524, [Oxford]  
 FT /colour=10  
 FT misc\_feature complement(3671987..3671988)  
 FT /label=NR31.20  
 FT /note=NR31.20, Estimate (27), [SBW25 April 05],Plate=P02,  
 Coordinates=C15, Trace=q158, [UWGC]  
 FT /colour=7  
 FT misc\_feature complement(3671991..3671992)  
 FT /label=NR31.02  
 FT /note=NR31.02, Exact (0), [SBW25 April 05],Plate=P02,  
 Coordinates=A3, Trace=q109, [UWGC]  
 FT /colour=7  
 FT misc\_feature 3671993..3671992  
 FT /label=NR31.04  
 FT /note=NR31.04, Exact (manual correction), [SBW25 April  
 05],Plate=P02, Coordinates=A7, Trace=q125, [UWGC]  
 FT /colour=7  
 FT misc\_feature 3671993..3671992  
 FT /label=NR31.15  
 FT /note=NR31.15, Exact (manual correction), [SBW25 April  
 05],Plate=P02, Coordinates=C5, Trace=q118, [UWGC]  
 FT /colour=7  
 FT misc\_feature 3671993..3671992  
 FT /label=NR31.18  
 FT /note=NR31.18, Exact (manual correction), [SBW25 April  
 05],Plate=P02, Coordinates=C11, Trace=q142, [UWGC]  
 FT /colour=7  
 FT misc\_feature 3671993..3671992  
 FT /label=NR31.36  
 FT /note=NR31.36, Exact (manual correction), [SBW25 April  
 05],Plate=P02, Coordinates=E23, Trace=q191, [UWGC]  
 FT /colour=7  
 FT misc\_feature 3671993..3671992  
 FT /label=NR31.37  
 FT /note=NR31.37, Exact (manual correction), [SBW25 April  
 05],Plate=P02, Coordinates=G1, Trace=q104, [UWGC]  
 FT /colour=7  
 FT misc\_feature 3671993..3671992

FT /label=NR31.44  
 FT /note=NR31.44, Exact (manual correction), [SBW25 April  
 05],Plate=P02, Coordinates=G15, Trace=q160, [UWGC]  
 FT /colour=7  
 FT misc\_feature 3671993..3671992  
 FT /label=NR31.60  
 FT /note=NR31.60, Exact (manual correction), [SBW25 April  
 05],Plate=P02, Coordinates=I23, Trace=q193, [UWGC]  
 FT /colour=7  
 FT misc\_feature complement(3671993..3671994)  
 FT /label=NR31.43  
 FT /note=NR31.43, Exact (manual correction), [SBW25 April  
 05],Plate=P02, Coordinates=G13, Trace=q152, [UWGC]  
 FT /colour=7  
 FT misc\_feature complement(3671998..3671999)  
 FT /label=NR31.08  
 FT /note=NR31.08, Exact (manual correction), [SBW25 April  
 05],Plate=P02, Coordinates=A15, Trace=q157, [UWGC]  
 FT /colour=7  
 FT misc\_feature complement(3671999..3672000)  
 FT /label=NR31.25  
 FT /note=NR31.25, Exact (0), [SBW25 April 05],Plate=P02,  
 Coordinates=E1, Trace=q103, [UWGC]  
 FT /colour=7  
 FT misc\_feature complement(3672004..3672005)  
 FT /label=NR31.01  
 FT /note=NR31.01, Exact (0), [SBW25 April 05],Plate=P02,  
 Coordinates=A1, Trace=q101, [UWGC]  
 FT /colour=7  
 FT misc\_feature complement(3672004..3672005)  
 FT /label=NR31.26  
 FT /note=NR31.26, Exact (0), [SBW25 April 05],Plate=P02,  
 Coordinates=E3, Trace=q111, [UWGC]  
 FT /colour=7  
 FT misc\_feature complement(3672004..3672005)  
 FT /label=NR42.91  
 FT /note=NR42.91, Exact (0), [SBW25 April 05],Plate=P03,  
 Coordinates=P14, Trace=q456, [UWGC]  
 FT /colour=7  
 FT misc\_feature complement(3672010..3672011)  
 FT /label=NR31.67  
 FT /note=NR31.67,MCS hit  
 =GATCTGCAG^GTCGAGCGCTTAATTAAGTTCGAGTTGGGTATG, [SBW25 April 05],Plate=P02,  
 Coordinates=K13, Trace=q154, [UWGC]  
 FT /colour=7  
 FT misc\_feature complement(3672043..3672044)  
 FT /label=NR42.52  
 FT /note=NR42.52, Exact (0), [SBW25 April 05],Plate=P03,  
 Coordinates=J8, Trace=q429, [UWGC]  
 FT /colour=7  
 FT misc\_feature complement(3672043..3672044)  
 FT /label=NR42.57  
 FT /note=NR42.57, Exact (0), [SBW25 April 05],Plate=P03,  
 Coordinates=J18, Trace=q469, [UWGC]  
 FT /colour=7  
 FT misc\_feature complement(3672072..3672073)  
 FT /label=NR42.27

FT /note=NR42.27, Estimate (28), [SBW25 April 05],Plate=P03,  
Coordinates=F6, Trace=q419, [UWGC]  
FT /colour=7  
FT misc\_feature 3672113..3672112  
FT /label=NR42.05  
FT /note=NR42.05, Exact (0), [SBW25 April 05],Plate=P03,  
Coordinates=B10, Trace=q433, [UWGC]  
FT /colour=7  
FT misc\_feature 3672118..3672117  
FT /label=NR42.83  
FT /note=NR42.83, Exact (0), [SBW25 April 05],Plate=P03,  
Coordinates=N22, Trace=q487, [UWGC]  
FT /colour=7  
FT misc\_feature complement(3672119..3672120)  
FT /label=NR42.77  
FT /note=NR42.77, Estimate (2), [SBW25 April 05],Plate=P03,  
Coordinates=N10, Trace=q439, [UWGC]  
FT /colour=7  
FT misc\_feature complement(3672141..3672142)  
FT /label=NR42.43  
FT /note=NR42.43, Estimate (7), [SBW25 April 05],Plate=P03,  
Coordinates=H14, Trace=q452, [UWGC]  
FT /colour=7  
FT misc\_feature 3672143..3672142  
FT /label=NR42.95  
FT /note=NR42.95, Exact (0), [SBW25 April 05],Plate=P03,  
Coordinates=P22, Trace=q488, [UWGC]  
FT /colour=7  
FT misc\_feature complement(3672145..3672146)  
FT /label=NR42.92  
FT /note=NR42.92, Estimate (28), [SBW25 April 05],Plate=P03,  
Coordinates=P16, Trace=q464, [UWGC]  
FT /colour=7  
FT misc\_feature complement(3672153..3672154)  
FT /label=NR42.64  
FT /note=NR42.64, Estimate (0), [SBW25 April 05],Plate=P03,  
Coordinates=L8, Trace=q430, [UWGC]  
FT /colour=7  
FT misc\_feature complement(3672154..3672155)  
FT /label=NR42.32  
FT /note=NR42.32, Estimate (3), [SBW25 April 05],Plate=P03,  
Coordinates=F16, Trace=q459, [UWGC]  
FT /colour=7  
FT misc\_feature complement(3672159..3672160)  
FT /label=NR42.16  
FT /note=NR42.16, Exact (0), [SBW25 April 05],Plate=P03,  
Coordinates=D8, Trace=q426, [UWGC]  
FT /colour=7  
FT misc\_feature complement(3672163..3672164)  
FT /label=NR42.72  
FT /note=NR42.72, Estimate (26), [SBW25 April 05],Plate=P03,  
Coordinates=L24, Trace=q494, [UWGC]  
FT /colour=7  
FT misc\_feature complement(3672164..3672165)  
FT /label=NR42.24  
FT /note=NR42.24, Estimate (27), [SBW25 April 05],Plate=P03,  
Coordinates=D24, Trace=q490, [UWGC]



FT /colour=7  
FT misc\_feature complement(3672173..3672174)  
FT /label=NR42.19  
FT /note=NR42.19, Estimate (26), [SBW25 April 05],Plate=P03,  
Coordinates=D14, Trace=q450, [UWGC]  
FT /colour=7  
FT misc\_feature complement(3672180..3672181)  
FT /label=NR42.17  
FT /note=NR42.17, Estimate (25), [SBW25 April 05],Plate=P03,  
Coordinates=D10, Trace=q434, [UWGC]  
FT /colour=7  
FT misc\_feature complement(3672186..3672187)  
FT /label=NR42.18  
FT /note=NR42.18, Estimate (31), [SBW25 April 05],Plate=P03,  
Coordinates=D12, Trace=q442, [UWGC]  
FT /colour=7  
FT misc\_feature complement(3672202..3672203)  
FT /label=NR42.06  
FT /note=NR42.06, Exact (0), [SBW25 April 05],Plate=P03,  
Coordinates=B12, Trace=q441, [UWGC]  
FT /colour=7  
FT misc\_feature complement(3672204..3672205)  
FT /label=NR42.96  
FT /note=NR42.96, Exact (0), [SBW25 April 05],Plate=P03,  
Coordinates=P24, Trace=q496, [UWGC]  
FT /colour=7  
FT misc\_feature complement(3672208..3672209)  
FT /label=NR42.79  
FT /note=NR42.79, Estimate (4), [SBW25 April 05],Plate=P03,  
Coordinates=N14, Trace=q455, [UWGC]  
FT /colour=7  
FT misc\_feature 3672220..3672219  
FT /label=NR42.61  
FT /note=NR42.61, Exact (0), [SBW25 April 05],Plate=P03,  
Coordinates=L2, Trace=q406, [UWGC]  
FT /colour=7  
FT misc\_feature 3672220..3672219  
FT /label=NR42.62  
FT /note=NR42.62, Exact (0), [SBW25 April 05],Plate=P03,  
Coordinates=L4, Trace=q414, [UWGC]  
FT /colour=7  
FT misc\_feature 3672220..3672219  
FT /label=NR42.69  
FT /note=NR42.69, Exact (0), [SBW25 April 05],Plate=P03,  
Coordinates=L18, Trace=q470, [UWGC]  
FT /colour=7  
FT misc\_feature 3672220..3672219  
FT /label=NR42.78  
FT /note=NR42.78, Exact (0), [SBW25 April 05],Plate=P03,  
Coordinates=N12, Trace=q447, [UWGC]  
FT /colour=7  
FT misc\_feature 3672222..3672221  
FT /label=NR42.13  
FT /note=NR42.13, Exact (0), [SBW25 April 05],Plate=P03,  
Coordinates=D2, Trace=q402, [UWGC]  
FT /colour=7  
FT misc\_feature 3672222..3672221

FT /label=NR42.34  
FT /note=NR42.34, Exact (0), [SBW25 April 05],Plate=P03,  
Coordinates=F20, Trace=q475, [UWGC]  
FT /colour=7  
FT misc\_feature 3672222..3672221  
FT /label=NR42.90  
FT /note=NR42.90, Exact (0), [SBW25 April 05],Plate=P03,  
Coordinates=P12, Trace=q448, [UWGC]  
FT /colour=7  
FT misc\_feature complement(3672223..3672224)  
FT /label=NR42.85  
FT /note=NR42.85, Estimate (0), [SBW25 April 05],Plate=P03,  
Coordinates=P2, Trace=q408, [UWGC]  
FT /colour=7  
FT misc\_feature complement(3672225..3672226)  
FT /label=NR42.11  
FT /note=NR42.11, Estimate (21), [SBW25 April 05],Plate=P03,  
Coordinates=B22, Trace=q481, [UWGC]  
FT /colour=7  
FT misc\_feature complement(3672231..3672232)  
FT /label=NR42.01  
FT /note=NR42.01, Exact (0), [SBW25 April 05],Plate=P03,  
Coordinates=B2, Trace=q401, [UWGC]  
FT /colour=7  
FT misc\_feature complement(3672233..3672234)  
FT /label=NR42.60  
FT /note=NR42.60, Estimate (2), [SBW25 April 05],Plate=P03,  
Coordinates=J24, Trace=q493, [UWGC]  
FT /colour=7  
FT misc\_feature complement(3672233..3672234)  
FT /label=NR42.67  
FT /note=NR42.67, Exact (0), [SBW25 April 05],Plate=P03,  
Coordinates=L14, Trace=q454, [UWGC]  
FT /colour=7  
FT misc\_feature 3672234..3672233  
FT /label=NR42.29  
FT /note=NR42.29, Exact (0), [SBW25 April 05],Plate=P03,  
Coordinates=F10, Trace=q435, [UWGC]  
FT /colour=7  
FT misc\_feature 3672256..3672255  
FT /label=NR41.40  
FT /note=NR41.40, Estimate (58), UWGC re-mapped on dapB  
deleted genome, [SBW25 April 05],Plate=P03, Coordinates=H7, Trace=q328, [UWGC]  
FT /colour=7  
FT misc\_feature 3672257..3672256  
FT /label=NR42.49  
FT /note=NR42.49, Exact (0), [SBW25 April 05],Plate=P03,  
Coordinates=J2, Trace=q405, [UWGC]  
FT /colour=7  
FT misc\_feature complement(3672257..3672258)  
FT /label=NR42.59  
FT /note=NR42.59, Estimate (10), [SBW25 April 05],Plate=P03,  
Coordinates=J22, Trace=q485, [UWGC]  
FT /colour=7  
FT misc\_feature complement(3672259..3672260)  
FT /label=NR42.80

FT /note=NR42.80, Estimate (26), [SBW25 April 05],Plate=P03,  
Coordinates=N16, Trace=q463, [UWGC]  
FT /colour=7  
FT misc\_feature complement(3672260..3672261)  
FT /label=NR42.75  
FT /note=NR42.75, Estimate (29), [SBW25 April 05],Plate=P03,  
Coordinates=N6, Trace=q423, [UWGC]  
FT /colour=7  
FT misc\_feature 3672268..3672267  
FT /label=NR42.44  
FT /note=NR42.44, Estimate (0), [SBW25 April 05],Plate=P03,  
Coordinates=H16, Trace=q460, [UWGC]  
FT /colour=7  
FT misc\_feature 3672278..3672277  
FT /label=NR42.46  
FT /note=NR42.46, Exact (0), [SBW25 April 05],Plate=P03,  
Coordinates=H20, Trace=q476, [UWGC]  
FT /colour=7  
FT misc\_feature complement(3672278..3672279)  
FT /label=NR42.42  
FT /note=NR42.42, Exact (0), [SBW25 April 05],Plate=P03,  
Coordinates=H12, Trace=q444, [UWGC]  
FT /colour=7  
FT misc\_feature complement(3672288..3672289)  
FT /label=NR42.12  
FT /note=NR42.12, Exact (0), [SBW25 April 05],Plate=P03,  
Coordinates=B24, Trace=q489, [UWGC]  
FT /colour=7  
FT misc\_feature 3672289..3672288  
FT /label=NR42.39  
FT /note=NR42.39, Exact (0), [SBW25 April 05],Plate=P03,  
Coordinates=H6, Trace=q420, [UWGC]  
FT /colour=7  
FT misc\_feature complement(3672292..3672293)  
FT /label=NR42.14  
FT /note=NR42.14, Estimate (29), [SBW25 April 05],Plate=P03,  
Coordinates=D4, Trace=q410, [UWGC]  
FT /colour=7  
FT misc\_feature 3672294..3672293  
FT /label=NR42.23  
FT /note=NR42.23, Estimate (30), UWGC re-mapped on dapB  
deleted genome, [SBW25 April 05],Plate=P03, Coordinates=D22, Trace=q482, [UWGC]  
FT /colour=7  
FT misc\_feature 3672294..3672293  
FT /label=NR42.38  
FT /note=NR42.38, Estimate (30), UWGC re-mapped on dapB  
deleted genome, [SBW25 April 05],Plate=P03, Coordinates=H4, Trace=q412, [UWGC]  
FT /colour=7  
FT misc\_feature 3672294..3672293  
FT /label=NR42.54  
FT /note=NR42.54, Estimate (30), UWGC re-mapped on dapB  
deleted genome, [SBW25 April 05],Plate=P03, Coordinates=J12, Trace=q445, [UWGC]  
FT /colour=7  
FT misc\_feature 3672294..3672293  
FT /label=NR42.76  
FT /note=NR42.76, Estimate (29), UWGC re-mapped on dapB  
deleted genome, [SBW25 April 05],Plate=P03, Coordinates=N8, Trace=q431, [UWGC]

FT /colour=7  
FT misc\_feature 3672299..3672298  
FT /label=NR42.51  
FT /note=NR42.51, Estimate (29), UWGC re-mapped on dapB  
deleted genome, [SBW25 April 05],Plate=P03, Coordinates=J6, Trace=q421, [UWGC]  
FT /colour=7  
FT misc\_feature complement(3672305..3672306)  
FT /label=NR42.65  
FT /note=NR42.65, Exact (0), [SBW25 April 05],Plate=P03,  
Coordinates=L10, Trace=q438, [UWGC]  
FT /colour=7  
FT misc\_feature 3672323..3672322  
FT /label=NR42.07  
FT /note=NR42.07, Exact (0), [SBW25 April 05],Plate=P03,  
Coordinates=B14, Trace=q449, [UWGC]  
FT /colour=7  
FT misc\_feature 3672323..3672322  
FT /label=NR42.15  
FT /note=NR42.15, Estimate (2), [SBW25 April 05],Plate=P03,  
Coordinates=D6, Trace=q418, [UWGC]  
FT /colour=7  
FT misc\_feature 3672323..3672322  
FT /label=NR42.21  
FT /note=NR42.21, Estimate (2), [SBW25 April 05],Plate=P03,  
Coordinates=D18, Trace=q466, [UWGC]  
FT /colour=7  
FT misc\_feature 3672323..3672322  
FT /label=NR42.47  
FT /note=NR42.47, Exact (0), [SBW25 April 05],Plate=P03,  
Coordinates=H22, Trace=q484, [UWGC]  
FT /colour=7  
FT misc\_feature 3672323..3672322  
FT /label=NR42.48  
FT /note=NR42.48, Exact (0), [SBW25 April 05],Plate=P03,  
Coordinates=H24, Trace=q492, [UWGC]  
FT /colour=7  
FT misc\_feature 3672323..3672322  
FT /label=NR42.53  
FT /note=NR42.53, Estimate (1), [SBW25 April 05],Plate=P03,  
Coordinates=J10, Trace=q437, [UWGC]  
FT /colour=7  
FT misc\_feature 3672323..3672322  
FT /label=NR42.55  
FT /note=NR42.55, Estimate (1), [SBW25 April 05],Plate=P03,  
Coordinates=J14, Trace=q453, [UWGC]  
FT /colour=7  
FT misc\_feature complement(3672332..3672333)  
FT /label=NR42.37  
FT /note=NR42.37, Estimate (27), [SBW25 April 05],Plate=P03,  
Coordinates=H2, Trace=q404, [UWGC]  
FT /colour=7  
FT misc\_feature 3672333..3672332  
FT /label=NR42.31  
FT /note=NR42.31, Exact (0), [SBW25 April 05],Plate=P03,  
Coordinates=F14, Trace=q451, [UWGC]  
FT /colour=7  
FT misc\_feature 3672333..3672332

FT /label=NR42.88  
FT /note=NR42.88, Exact (0), [SBW25 April 05],Plate=P03,  
Coordinates=P8, Trace=q432, [UWGC]  
FT /colour=7  
FT misc\_feature complement(3672333..3672334)  
FT /label=NR42.03  
FT /note=NR42.03, Estimate (0), [SBW25 April 05],Plate=P03,  
Coordinates=B6, Trace=q417, [UWGC]  
FT /colour=7  
FT misc\_feature complement(3672333..3672334)  
FT /label=NR42.10  
FT /note=NR42.10, Estimate (0), [SBW25 April 05],Plate=P03,  
Coordinates=B20, Trace=q473, [UWGC]  
FT /colour=7  
FT misc\_feature complement(3672333..3672334)  
FT /label=NR42.35  
FT /note=NR42.35, Exact (0), [SBW25 April 05],Plate=P03,  
Coordinates=F22, Trace=q483, [UWGC]  
FT /colour=7  
FT misc\_feature complement(3672333..3672334)  
FT /label=NR42.70  
FT /note=NR42.70, Exact (manual correction), [SBW25 April  
05],Plate=P03, Coordinates=L20, Trace=q478, [UWGC]  
FT /colour=7  
FT misc\_feature complement(3672333..3672334)  
FT /label=NR42.93  
FT /note=NR42.93, Exact (manual correction), [SBW25 April  
05],Plate=P03, Coordinates=P18, Trace=q472, [UWGC]  
FT /colour=7  
FT misc\_feature complement(3672334..3672335)  
FT /label=NR42.40  
FT /note=NR42.40, Exact (0), [SBW25 April 05],Plate=P03,  
Coordinates=H8, Trace=q428, [UWGC]  
FT /colour=7  
FT misc\_feature complement(3672334..3672335)  
FT /label=NR42.71  
FT /note=NR42.71, Exact (0), [SBW25 April 05],Plate=P03,  
Coordinates=L22, Trace=q486, [UWGC]  
FT /colour=7  
FT misc\_feature complement(3672334..3672335)  
FT /label=NR42.94  
FT /note=NR42.94, Exact (0), [SBW25 April 05],Plate=P03,  
Coordinates=P20, Trace=q480, [UWGC]  
FT /colour=7  
FT misc\_feature 3672343..3672342  
FT /label=NR42.20  
FT /note=NR42.20, Exact (0), [SBW25 April 05],Plate=P03,  
Coordinates=D16, Trace=q458, [UWGC]  
FT /colour=7  
FT misc\_feature 3672343..3672342  
FT /label=NR42.84  
FT /note=NR42.84, Exact (0), [SBW25 April 05],Plate=P03,  
Coordinates=N24, Trace=q495, [UWGC]  
FT /colour=7  
FT misc\_feature 3672344..3672343  
FT /label=NR42.04

FT /note=NR42.04, Estimate (0), [SBW25 April 05],Plate=P03,  
Coordinates=B8, Trace=q425, [UWGC]  
FT /colour=7  
FT misc\_feature complement(3672344..3672345)  
FT /label=NR42.63  
FT /note=NR42.63, Exact (0), [SBW25 April 05],Plate=P03,  
Coordinates=L6, Trace=q422, [UWGC]  
FT /colour=7  
FT misc\_feature 3672353..3672352  
FT /label=NR42.02  
FT /note=NR42.02, Exact (0), [SBW25 April 05],Plate=P03,  
Coordinates=B4, Trace=q409, [UWGC]  
FT /colour=7  
FT misc\_feature 3672353..3672352  
FT /label=NR42.08  
FT /note=NR42.08, Exact (0), UWGC re-mapped on dapB deleted  
genome, [SBW25 April 05],Plate=P03, Coordinates=B16, Trace=q457, [UWGC]  
FT /colour=7  
FT misc\_feature 3672353..3672352  
FT /label=NR42.25  
FT /note=NR42.25, Exact (0), UWGC re-mapped on dapB deleted  
genome, [SBW25 April 05],Plate=P03, Coordinates=F2, Trace=q403, [UWGC]  
FT /colour=7  
FT misc\_feature 3672353..3672352  
FT /label=NR42.30  
FT /note=NR42.30, Exact (0), [SBW25 April 05],Plate=P03,  
Coordinates=F12, Trace=q443, [UWGC]  
FT /colour=7  
FT misc\_feature 3672353..3672352  
FT /label=NR42.33  
FT /note=NR42.33, Exact (0), UWGC re-mapped on dapB deleted  
genome, [SBW25 April 05],Plate=P03, Coordinates=F18, Trace=q467, [UWGC]  
FT /colour=7  
FT misc\_feature 3672353..3672352  
FT /label=NR42.58  
FT /note=NR42.58, Exact (0), UWGC re-mapped on dapB deleted  
genome, [SBW25 April 05],Plate=P03, Coordinates=J20, Trace=q477, [UWGC]  
FT /colour=7  
FT misc\_feature 3672353..3672352  
FT /label=NR42.68  
FT /note=NR42.68, Exact (0), UWGC re-mapped on dapB deleted  
genome, [SBW25 April 05],Plate=P03, Coordinates=L16, Trace=q462, [UWGC]  
FT /colour=7  
FT misc\_feature 3672353..3672352  
FT /label=NR42.74  
FT /note=NR42.74, Exact (0), UWGC re-mapped on dapB deleted  
genome, [SBW25 April 05],Plate=P03, Coordinates=N4, Trace=q415, [UWGC]  
FT /colour=7  
FT misc\_feature complement(3672353..3672354)  
FT /label=NR42.36  
FT /note=NR42.36, Estimate (0), [SBW25 April 05],Plate=P03,  
Coordinates=F24, Trace=q491, [UWGC]  
FT /colour=7  
FT misc\_feature 3672354..3672353  
FT /label=NR42.45  
FT /note=NR42.45, Exact (0), UWGC re-mapped on dapB deleted  
genome, [SBW25 April 05],Plate=P03, Coordinates=H18, Trace=q468, [UWGC]

FT /colour=7  
FT misc\_feature 3672354..3672353  
FT /label=NR42.87  
FT /note=NR42.87, Estimate (0), UWGC re-mapped on dapB deleted genome, [SBW25 April 05], Plate=P03, Coordinates=P6, Trace=q424, [UWGC]  
FT /colour=7  
FT misc\_feature complement(3672354..3672355)  
FT /label=NR42.22  
FT /note=NR42.22, Exact (0), [SBW25 April 05], Plate=P03, Coordinates=D20, Trace=q474, [UWGC]  
FT /colour=7  
FT misc\_feature 3672433..3672434  
FT /label=NR42.41  
FT /note=NR42.41, MCS hit = GATCTGCAGGTCGAGCGCTTAATT^AACTAGTCGAGTTGGGTATG, [SBW25 April 05], Plate=P03, Coordinates=H10, Trace=q436, [UWGC]  
FT /colour=7  
FT misc\_feature 3672433..3672434  
FT /label=NR42.73  
FT /note=NR42.73, MCS hit = GATCTGCAGG^NNNNNNNNNTAATTAAGTCGAGTTGGGTATG, [SBW25 April 05], Plate=P03, Coordinates=N2, Trace=q407, [UWGC]  
FT /colour=7  
FT misc\_feature 3672433..3672434  
FT /label=NR42.82  
FT /note=NR42.82, MCS hit = GATCTGCAGGTCGAGCGCTTAATTAAGTC^GAGTTGGGTATG, [SBW25 April 05], Plate=P03, Coordinates=N20, Trace=q479, [UWGC]  
FT /colour=7  
FT misc\_feature 3714445..3714444  
FT /label=NR12.P10  
FT /note=NR12.P10, Exact (0), [SBW25 April 05], Plate=P06, Coordinates=O7, Trace=q132, [UWGC]  
FT /colour=7  
FT misc\_feature 3806996..3806995  
FT /label=NR12.M5.03  
FT /note=NR12.M5.03, Exact (0), [SBW25 April 05], Plate=PM5.1, Coordinates=D6, Trace=C490, [Oxford]  
FT /colour=10  
FT misc\_feature 3842157..3842156  
FT /label=NR54.M5.02  
FT /note=NR54.M5.02, Exact (0), [SBW25 April 05], Plate=PM5.2, Coordinates=E4, Trace=C572, [Oxford]  
FT /colour=10  
FT misc\_feature complement(3912517..3912518)  
FT /label=NR12.38  
FT /note=NR12.38, Exact (0), [SBW25 April 05], Plate=P01, Coordinates=G4, Trace=q212, [UWGC]  
FT /colour=7  
FT misc\_feature 3936773..3936772  
FT /label=NR55.M5.04  
FT /note=NR55.M5.04, Exact (0), [SBW25 April 05], Plate=PM5.2, Coordinates=G3, Trace=C566, [Oxford]  
FT /colour=10  
FT misc\_feature 3947577..3947576  
FT /label=NR04.104

FT /note=NR04.104, Estimate (40), [SBW25 April 05],Plate=P07,  
Coordinates=H01, Trace=q304, [UWGC]  
FT /colour=7  
FT misc\_feature 3970881..3970880  
FT /label=NR54.P06  
FT /note=NR54.P06, Exact (manual correction), [SBW25 April  
05],Plate=P06, Coordinates=A23, Trace=q189, [UWGC]  
FT /colour=7  
FT misc\_feature 4062615..4062614  
FT /label=NR33.21  
FT /note=NR33.21, Exact (manual correction), [SBW25 April  
05],Plate=P02, Coordinates=D17, Trace=q366, [UWGC]  
FT /colour=7  
FT misc\_feature complement(4133866..4133867)  
FT /label=NR20.23  
FT /note=NR20.23, Estimate (32), [SBW25 April 05],Plate=P07,  
Coordinates=K10, Trace=q238, [UWGC]  
FT /colour=7  
FT misc\_feature complement(4148833..4148834)  
FT /label=NR54.110  
FT /note=NR54.110, Estimate (44), [SBW25 April 05],Plate=P07,  
Coordinates=K23, Trace=q194, [UWGC]  
FT /colour=7  
FT misc\_feature 4149633..4149632  
FT /label=NR12.36  
FT /note=NR12.36, Exact (0), [SBW25 April 05],Plate=P01,  
Coordinates=E24, Trace=q291, [UWGC]  
FT /colour=7  
FT misc\_feature complement(4201039..4201040)  
FT /label=NR54.113  
FT /note=NR54.113, Exact (0), [SBW25 April 05],Plate=P07,  
Coordinates=N23, Trace=q395, [UWGC]  
FT /colour=7  
FT misc\_feature 4203417..4203416  
FT /label=NR49.108  
FT /note=NR49.108, Estimate (69), [SBW25 April 05],Plate=P07,  
Coordinates=A18, Trace=q265, [UWGC]  
FT /colour=7  
FT misc\_feature 4203445..4203444  
FT /label=NR49.M5.02  
FT /note=NR49.M5.02, Exact (0), [SBW25 April 05],Plate=PM5.2,  
Coordinates=C2, Trace=C554, [Oxford]  
FT /colour=10  
FT misc\_feature complement(4204068..4204067)  
FT /label=NR49.103  
FT /note=NR49.103, Exact (0), [SBW25 April 05],Plate=P07,  
Coordinates=L17, Trace=NR49\_103, [Oxford]  
FT /colour=7  
FT misc\_feature 4204140..4204141  
FT /label=NR49.100  
FT /note=NR49.100, Exact (0), [SBW25 April 05],Plate=P07,  
Coordinates=I17, Trace=NR49\_100, [Oxford]  
FT /colour=7  
FT misc\_feature 4204527..4204528  
FT /label=NR49.107  
FT /note=NR49.107, Exact (0), [SBW25 April 05],Plate=P07,  
Coordinates=P17, Trace=NR49\_107, [Oxford]



FT /colour=7  
 FT misc\_feature 4206763..4206762  
 FT /label=NR55.M5.23  
 FT /note=NR55.M5.23, Exact (0), [SBW25 April 05],Plate=PM5.2,  
 Coordinates=H10, Trace=C623, [Oxford]  
 FT /colour=10  
 FT misc\_feature complement(4210059..4210060)  
 FT /label=NR09.43  
 FT /note=NR09.43, Estimate (18), [SBW25 April 05],Plate=P07,  
 Coordinates=E06, Trace=q219, [UWGC]  
 FT /colour=7  
 FT misc\_feature complement(4236765..4236766)  
 FT /label=NR51.M5.04  
 FT /note=NR51.M5.04, Exact (0), [SBW25 April 05],Plate=PM5.2,  
 Coordinates=C10, Trace=C618, [Oxford]  
 FT /colour=10  
 FT misc\_feature 4249612..4249611  
 FT /label=NR18.36  
 FT /note=NR18.36, Estimate (105), [SBW25 April 05],Plate=P01,  
 Coordinates=F23, Trace=q391, [UWGC]  
 FT /colour=7  
 FT misc\_feature 4256160..4256159  
 FT /label=NR09.66  
 FT /note=NR09.66, Estimate (118), [SBW25 April 05],Plate=P07,  
 Coordinates=L07, Trace=q330, [UWGC]  
 FT /colour=7  
 FT misc\_feature 4284107..4284106  
 FT /label=NR55.52  
 FT /note=NR55.52, Estimate (22), [SBW25 April 05],Plate=P05,  
 Coordinates=I8, Trace=q229, [UWGC]  
 FT /colour=7  
 FT misc\_feature 4284110..4284109  
 FT /label=NR55.51  
 FT /note=NR55.51, Estimate (1), [SBW25 April 05],Plate=P05,  
 Coordinates=I6, Trace=q221, [UWGC]  
 FT /colour=7  
 FT misc\_feature complement(4284121..4284122)  
 FT /label=NR55.M5.12  
 FT /note=NR55.M5.12, Exact (0), [SBW25 April 05],Plate=PM5.2,  
 Coordinates=G11, Trace=C630, [Oxford]  
 FT /colour=10  
 FT misc\_feature 4284136..4284135  
 FT /label=NR55.76  
 FT /note=NR55.76, Exact (0), [SBW25 April 05],Plate=P05,  
 Coordinates=M8, Trace=q231, [UWGC]  
 FT /colour=7  
 FT misc\_feature complement(4284190..4284191)  
 FT /label=NR55.69  
 FT /note=NR55.69, Estimate (0), [SBW25 April 05],Plate=P05,  
 Coordinates=K18, Trace=q270, [UWGC]  
 FT /colour=7  
 FT misc\_feature complement(4284191..4284192)  
 FT /label=NR55.59  
 FT /note=NR55.59, Exact (0), [SBW25 April 05],Plate=P05,  
 Coordinates=I22, Trace=q285, [UWGC]  
 FT /colour=7  
 FT misc\_feature complement(4284209..4284210)

FT /label=NR55.94  
FT /note=NR55.94, Estimate (1), [SBW25 April 05],Plate=P05,  
Coordinates=O20, Trace=q280, [UWGC]  
FT /colour=7  
FT misc\_feature complement(4284240..4284241)  
FT /label=NR55.81  
FT /note=NR55.81, Exact (0), [SBW25 April 05],Plate=P05,  
Coordinates=M18, Trace=q271, [UWGC]  
FT /colour=7  
FT misc\_feature 4284316..4284315  
FT /label=NR55.M5.09  
FT /note=NR55.M5.09, Exact (0), [SBW25 April 05],Plate=PM5.2,  
Coordinates=G8, Trace=C606, [Oxford]  
FT /colour=10  
FT misc\_feature complement(4284396..4284397)  
FT /label=NR55.82  
FT /note=NR55.82, Estimate (16), [SBW25 April 05],Plate=P05,  
Coordinates=M20, Trace=q279, [UWGC]  
FT /colour=7  
FT misc\_feature 4284690..4284689  
FT /label=NR55.71  
FT /note=NR55.71, Exact (0), [SBW25 April 05],Plate=P05,  
Coordinates=K22, Trace=q286, [UWGC]  
FT /colour=7  
FT misc\_feature 4284690..4284689  
FT /label=NR55.M5.13  
FT /note=NR55.M5.13, Exact (0), [SBW25 April 05],Plate=PM5.2,  
Coordinates=G12, Trace=C638, [Oxford]  
FT /colour=10  
FT misc\_feature complement(4284701..4284702)  
FT /label=NR55.61  
FT /note=NR55.61, Estimate (2), [SBW25 April 05],Plate=P05,  
Coordinates=K2, Trace=q206, [UWGC]  
FT /colour=7  
FT misc\_feature complement(4284706..4284707)  
FT /label=NR55.M5.01  
FT /note=NR55.M5.01, Exact (0), [SBW25 April 05],Plate=PM5.2,  
Coordinates=F12, Trace=C637, [Oxford]  
FT /colour=10  
FT misc\_feature complement(4284736..4284737)  
FT /label=NR55.30  
FT /note=NR55.30, Exact (manual correction), [SBW25 April  
05],Plate=P05, Coordinates=E12, Trace=q243, [UWGC]  
FT /colour=7  
FT misc\_feature complement(4284736..4284737)  
FT /label=NR55.64  
FT /note=NR55.64, Exact (0), [SBW25 April 05],Plate=P05,  
Coordinates=K8, Trace=q230, [UWGC]  
FT /colour=7  
FT misc\_feature complement(4284741..4284742)  
FT /label=NR55.23  
FT /note=NR55.23, Estimate (24), [SBW25 April 05],Plate=P05,  
Coordinates=C22, Trace=q282, [UWGC]  
FT /colour=7  
FT misc\_feature complement(4284886..4284887)  
FT /label=NR55.12

FT /note=NR55.12, Estimate (8), [SBW25 April 05],Plate=P05,  
Coordinates=A24, Trace=q289, [UWGC]  
FT /colour=7  
FT misc\_feature 4284902..4284901  
FT /label=NR55.M5.02  
FT /note=NR55.M5.02, Exact (0), [SBW25 April 05],Plate=PM5.2,  
Coordinates=G1, Trace=C550, [Oxford]  
FT /colour=10  
FT misc\_feature 4284918..4284917  
FT /label=NR55.88  
FT /note=NR55.88, Estimate (24), [SBW25 April 05],Plate=P05,  
Coordinates=O8, Trace=q232, [UWGC]  
FT /colour=7  
FT misc\_feature 4284942..4284941  
FT /label=NR55.86  
FT /note=NR55.86, Exact (0), [SBW25 April 05],Plate=P05,  
Coordinates=O4, Trace=q216, [UWGC]  
FT /colour=7  
FT misc\_feature complement(4284968..4284969)  
FT /label=NR55.77  
FT /note=NR55.77, Exact (0), [SBW25 April 05],Plate=P05,  
Coordinates=M10, Trace=q239, [UWGC]  
FT /colour=7  
FT misc\_feature complement(4284976..4284977)  
FT /label=NR55.90  
FT /note=NR55.90, Exact (manual correction), [SBW25 April  
05],Plate=P05, Coordinates=O12, Trace=q248, [UWGC]  
FT /colour=7  
FT misc\_feature complement(4285040..4285041)  
FT /label=NR55.85  
FT /note=NR55.85, Exact (0), [SBW25 April 05],Plate=P05,  
Coordinates=O2, Trace=q208, [UWGC]  
FT /colour=7  
FT misc\_feature complement(4285125..4285126)  
FT /label=NR55.31  
FT /note=NR55.31, Estimate (23), [SBW25 April 05],Plate=P05,  
Coordinates=E14, Trace=q251, [UWGC]  
FT /colour=7  
FT misc\_feature complement(4285249..4285250)  
FT /label=NR55.63  
FT /note=NR55.63, Estimate (24), [SBW25 April 05],Plate=P05,  
Coordinates=K6, Trace=q222, [UWGC]  
FT /colour=7  
FT misc\_feature complement(4287359..4287360)  
FT /label=NR46.25  
FT /note=NR46.25, Estimate (57), [SBW25 April 05],Plate=P04,  
Coordinates=E2, Trace=q203, [UWGC]  
FT /colour=7  
FT misc\_feature 4290598..4290597  
FT /label=NR09.46  
FT /note=NR09.46, Estimate (34), [SBW25 April 05],Plate=P07,  
Coordinates=H06, Trace=q420, [UWGC]  
FT /colour=7  
FT misc\_feature 4333673..4333674  
FT /label=NR08.09  
FT /note=NR08.09, Exact (manual correction), [SBW25 April  
05],Plate=P07, Coordinates=A03, Trace=q109, [UWGC]

FT /colour=7  
FT misc\_feature complement(4475685..4475686)  
FT /label=NR37.P04  
FT /note=NR37.P04, Exact (0), [SBW25 April 05],Plate=P06,  
Coordinates=A7, Trace=q125, [UWGC]  
FT /colour=7  
FT misc\_feature complement(4475767..4475768)  
FT /label=NR37.P03  
FT /note=NR37.P03, Estimate (2), [SBW25 April 05],Plate=P06,  
Coordinates=A5, Trace=q117, [UWGC]  
FT /colour=7  
FT misc\_feature complement(4475781..4475782)  
FT /label=NR37.P06  
FT /note=NR37.P06, Exact (0), [SBW25 April 05],Plate=P06,  
Coordinates=A11, Trace=q141, [UWGC]  
FT /colour=7  
FT misc\_feature complement(4475813..4475814)  
FT /label=NR37.71  
FT /note=NR37.71, Estimate (2), [SBW25 April 05],Plate=P03,  
Coordinates=K22, Trace=q286, [UWGC]  
FT /colour=7  
FT misc\_feature complement(4475818..4475819)  
FT /label=NR37.35  
FT /note=NR37.35, Estimate (29), [SBW25 April 05],Plate=P03,  
Coordinates=E22, Trace=q283, [UWGC]  
FT /colour=7  
FT misc\_feature 4475822..4475821  
FT /label=NR37.47  
FT /note=NR37.47, Exact (0), [SBW25 April 05],Plate=P03,  
Coordinates=G22, Trace=q284, [UWGC]  
FT /colour=7  
FT misc\_feature complement(4475822..4475823)  
FT /label=NR37.43  
FT /note=NR37.43, Estimate (0), [SBW25 April 05],Plate=P03,  
Coordinates=G14, Trace=q252, [UWGC]  
FT /colour=7  
FT misc\_feature 4475828..4475827  
FT /label=NR37.P12  
FT /note=NR37.P12, Estimate (14), [SBW25 April 05],Plate=P06,  
Coordinates=C11, Trace=q142, [UWGC]  
FT /colour=7  
FT misc\_feature complement(4475838..4475839)  
FT /label=NR37.84  
FT /note=NR37.84, Estimate (3), [SBW25 April 05],Plate=P03,  
Coordinates=M24, Trace=q295, [UWGC]  
FT /colour=7  
FT misc\_feature complement(4475838..4475839)  
FT /label=NR37.92  
FT /note=NR37.92, Estimate (2), [SBW25 April 05],Plate=P03,  
Coordinates=O16, Trace=q264, [UWGC]  
FT /colour=7  
FT misc\_feature complement(4475846..4475847)  
FT /label=NR37.89  
FT /note=NR37.89, Exact (0), [SBW25 April 05],Plate=P03,  
Coordinates=O10, Trace=q240, [UWGC]  
FT /colour=7  
FT misc\_feature complement(4475852..4475853)

FT /label=NR37.67  
FT /note=NR37.67, Estimate (61), [SBW25 April 05],Plate=P03,  
Coordinates=K14, Trace=q254, [UWGC]  
FT /colour=7  
FT misc\_feature 4475860..4475859  
FT /label=NR37.45  
FT /note=NR37.45, Exact (0), [SBW25 April 05],Plate=P03,  
Coordinates=G18, Trace=q268, [UWGC]  
FT /colour=7  
FT misc\_feature 4475861..4475860  
FT /label=NR37.44  
FT /note=NR37.44, Estimate (0), [SBW25 April 05],Plate=P03,  
Coordinates=G16, Trace=q260, [UWGC]  
FT /colour=7  
FT misc\_feature 4475867..4475866  
FT /label=NR37.90  
FT /note=NR37.90, Exact (0), [SBW25 April 05],Plate=P03,  
Coordinates=O12, Trace=q248, [UWGC]  
FT /colour=7  
FT misc\_feature complement(4475871..4475872)  
FT /label=NR37.09  
FT /note=NR37.09, Estimate (2), [SBW25 April 05],Plate=P03,  
Coordinates=A18, Trace=q265, [UWGC]  
FT /colour=7  
FT misc\_feature complement(4475871..4475872)  
FT /label=NR37.36  
FT /note=NR37.36, Estimate (35), [SBW25 April 05],Plate=P03,  
Coordinates=E24, Trace=q291, [UWGC]  
FT /colour=7  
FT misc\_feature 4475876..4475875  
FT /label=NR37.76  
FT /note=NR37.76, Estimate (0), [SBW25 April 05],Plate=P03,  
Coordinates=M8, Trace=q231, [UWGC]  
FT /colour=7  
FT misc\_feature complement(4475878..4475879)  
FT /label=NR37.02  
FT /note=NR37.02, Exact (0), [SBW25 April 05],Plate=P03,  
Coordinates=A4, Trace=q209, [UWGC]  
FT /colour=7  
FT misc\_feature complement(4475878..4475879)  
FT /label=NR37.P09  
FT /note=NR37.P09, Exact (0), [SBW25 April 05],Plate=P06,  
Coordinates=C5, Trace=q118, [UWGC]  
FT /colour=7  
FT misc\_feature 4475880..4475879  
FT /label=NR37.12  
FT /note=NR37.12, Exact (0), [SBW25 April 05],Plate=P03,  
Coordinates=A24, Trace=q289, [UWGC]  
FT /colour=7  
FT misc\_feature 4475880..4475879  
FT /label=NR37.34  
FT /note=NR37.34, Exact (0), [SBW25 April 05],Plate=P03,  
Coordinates=E20, Trace=q275, [UWGC]  
FT /colour=7  
FT misc\_feature 4475880..4475879  
FT /label=NR37.48

FT /note=NR37.48, Exact (0), [SBW25 April 05],Plate=P03,  
Coordinates=G24, Trace=q292, [UWGC]  
FT /colour=7  
FT misc\_feature 4475880..4475879  
FT /label=NR37.57  
FT /note=NR37.57, Exact (0), [SBW25 April 05],Plate=P03,  
Coordinates=I18, Trace=q269, [UWGC]  
FT /colour=7  
FT misc\_feature 4475880..4475879  
FT /label=NR37.79  
FT /note=NR37.79, Exact (0), [SBW25 April 05],Plate=P03,  
Coordinates=M14, Trace=q255, [UWGC]  
FT /colour=7  
FT misc\_feature 4475880..4475879  
FT /label=NR37.80  
FT /note=NR37.80, Exact (0), [SBW25 April 05],Plate=P03,  
Coordinates=M16, Trace=q263, [UWGC]  
FT /colour=7  
FT misc\_feature 4475880..4475879  
FT /label=NR37.83  
FT /note=NR37.83, Estimate (0), [SBW25 April 05],Plate=P03,  
Coordinates=M22, Trace=q287, [UWGC]  
FT /colour=7  
FT misc\_feature 4475880..4475879  
FT /label=NR37.91  
FT /note=NR37.91, Exact (0), [SBW25 April 05],Plate=P03,  
Coordinates=O14, Trace=q256, [UWGC]  
FT /colour=7  
FT misc\_feature 4475880..4475879  
FT /label=NR37.95  
FT /note=NR37.95, Estimate (0), [SBW25 April 05],Plate=P03,  
Coordinates=O22, Trace=q288, [UWGC]  
FT /colour=7  
FT misc\_feature 4475880..4475879  
FT /label=NR37.P01  
FT /note=NR37.P01, Exact (0), [SBW25 April 05],Plate=P06,  
Coordinates=A1, Trace=q101, [UWGC]  
FT /colour=7  
FT misc\_feature 4475881..4475880  
FT /label=NR37.68  
FT /note=NR37.68, Estimate (0), [SBW25 April 05],Plate=P03,  
Coordinates=K16, Trace=q262, [UWGC]  
FT /colour=7  
FT misc\_feature 4475881..4475880  
FT /label=NR37.88  
FT /note=NR37.88, Estimate (0), [SBW25 April 05],Plate=P03,  
Coordinates=O8, Trace=q232, [UWGC]  
FT /colour=7  
FT misc\_feature complement(4475891..4475892)  
FT /label=NR37.11  
FT /note=NR37.11, Exact (0), [SBW25 April 05],Plate=P03,  
Coordinates=A22, Trace=q281, [UWGC]  
FT /colour=7  
FT misc\_feature complement(4475891..4475892)  
FT /label=NR37.22  
FT /note=NR37.22, Exact (0), [SBW25 April 05],Plate=P03,  
Coordinates=C20, Trace=q274, [UWGC]

FT /colour=7  
FT misc\_feature complement(4475891..4475892)  
FT /label=NR37.31  
FT /note=NR37.31, Exact (0), [SBW25 April 05],Plate=P03,  
Coordinates=E14, Trace=q251, [UWGC]  
FT /colour=7  
FT misc\_feature complement(4475891..4475892)  
FT /label=NR37.41  
FT /note=NR37.41, Exact (0), [SBW25 April 05],Plate=P03,  
Coordinates=G10, Trace=q236, [UWGC]  
FT /colour=7  
FT misc\_feature complement(4475891..4475892)  
FT /label=NR37.55  
FT /note=NR37.55, Exact (0), [SBW25 April 05],Plate=P03,  
Coordinates=I14, Trace=q253, [UWGC]  
FT /colour=7  
FT misc\_feature complement(4475891..4475892)  
FT /label=NR37.58  
FT /note=NR37.58, Exact (0), [SBW25 April 05],Plate=P03,  
Coordinates=I20, Trace=q277, [UWGC]  
FT /colour=7  
FT misc\_feature complement(4475891..4475892)  
FT /label=NR37.64  
FT /note=NR37.64, Exact (0), [SBW25 April 05],Plate=P03,  
Coordinates=K8, Trace=q230, [UWGC]  
FT /colour=7  
FT misc\_feature complement(4475891..4475892)  
FT /label=NR37.82  
FT /note=NR37.82, Exact (0), [SBW25 April 05],Plate=P03,  
Coordinates=M20, Trace=q279, [UWGC]  
FT /colour=7  
FT misc\_feature complement(4475891..4475892)  
FT /label=NR37.86  
FT /note=NR37.86, Exact (0), [SBW25 April 05],Plate=P03,  
Coordinates=O4, Trace=q216, [UWGC]  
FT /colour=7  
FT misc\_feature complement(4475918..4475919)  
FT /label=NR37.73  
FT /note=NR37.73, Estimate (26), [SBW25 April 05],Plate=P03,  
Coordinates=M2, Trace=q207, [UWGC]  
FT /colour=7  
FT misc\_feature complement(4475918..4475919)  
FT /label=NR37.P02  
FT /note=NR37.P02, Estimate (26), [SBW25 April 05],Plate=P06,  
Coordinates=A3, Trace=q109, [UWGC]  
FT /colour=7  
FT misc\_feature complement(4475920..4475921)  
FT /label=NR37.01  
FT /note=NR37.01, Estimate (28), [SBW25 April 05],Plate=P03,  
Coordinates=A2, Trace=q201, [UWGC]  
FT /colour=7  
FT misc\_feature 4475924..4475923  
FT /label=NR37.24  
FT /note=NR37.24, Exact (0), [SBW25 April 05],Plate=P03,  
Coordinates=C24, Trace=q290, [UWGC]  
FT /colour=7  
FT misc\_feature complement(4475927..4475928)

FT /label=NR37.74  
FT /note=NR37.74, Estimate (35), [SBW25 April 05],Plate=P03,  
Coordinates=M4, Trace=q215, [UWGC]  
FT /colour=7  
FT misc\_feature complement(4475951..4475952)  
FT /label=NR37.59  
FT /note=NR37.59, Estimate (95), [SBW25 April 05],Plate=P03,  
Coordinates=I22, Trace=q285, [UWGC]  
FT /colour=7  
FT misc\_feature complement(4475955..4475956)  
FT /label=NR37.32  
FT /note=NR37.32, Estimate (100), [SBW25 April 05],Plate=P03,  
Coordinates=E16, Trace=q259, [UWGC]  
FT /colour=7  
FT misc\_feature complement(4475955..4475956)  
FT /label=NR37.P05  
FT /note=NR37.P05, Exact (0), [SBW25 April 05],Plate=P06,  
Coordinates=A9, Trace=q133, [UWGC]  
FT /colour=7  
FT misc\_feature complement(4475968..4475969)  
FT /label=NR37.94  
FT /note=NR37.94, Exact (0), [SBW25 April 05],Plate=P03,  
Coordinates=O20, Trace=q280, [UWGC]  
FT /colour=7  
FT misc\_feature 4476002..4476001  
FT /label=NR37.33  
FT /note=NR37.33, Exact (0), [SBW25 April 05],Plate=P03,  
Coordinates=E18, Trace=q267, [UWGC]  
FT /colour=7  
FT misc\_feature 4476015..4476014  
FT /label=NR37.21  
FT /note=NR37.21, Exact (0), [SBW25 April 05],Plate=P03,  
Coordinates=C18, Trace=q266, [UWGC]  
FT /colour=7  
FT misc\_feature 4476031..4476030  
FT /label=NR37.81  
FT /note=NR37.81, Estimate (7), [SBW25 April 05],Plate=P03,  
Coordinates=M18, Trace=q271, [UWGC]  
FT /colour=7  
FT misc\_feature complement(4476042..4476043)  
FT /label=NR37.29  
FT /note=NR37.29, Estimate (29), [SBW25 April 05],Plate=P03,  
Coordinates=E10, Trace=q235, [UWGC]  
FT /colour=7  
FT misc\_feature complement(4476042..4476043)  
FT /label=NR37.40  
FT /note=NR37.40, Exact (0), [SBW25 April 05],Plate=P03,  
Coordinates=G8, Trace=q228, [UWGC]  
FT /colour=7  
FT misc\_feature complement(4476048..4476049)  
FT /label=NR37.28  
FT /note=NR37.28, Estimate (1), [SBW25 April 05],Plate=P03,  
Coordinates=E8, Trace=q227, [UWGC]  
FT /colour=7  
FT misc\_feature 4476056..4476055  
FT /label=NR37.96



FT /note=NR37.96, Exact (0), [SBW25 April 05],Plate=P03,  
Coordinates=O24, Trace=q296, [UWGC]  
FT /colour=7  
FT misc\_feature complement(4476067..4476068)  
FT /label=NR37.66  
FT /note=NR37.66, Exact (0), [SBW25 April 05],Plate=P03,  
Coordinates=K12, Trace=q246, [UWGC]  
FT /colour=7  
FT misc\_feature complement(4476067..4476068)  
FT /label=NR37.69  
FT /note=NR37.69, Exact (0), [SBW25 April 05],Plate=P03,  
Coordinates=K18, Trace=q270, [UWGC]  
FT /colour=7  
FT misc\_feature complement(4476067..4476068)  
FT /label=NR37.P10  
FT /note=NR37.P10, Exact (0), [SBW25 April 05],Plate=P06,  
Coordinates=C7, Trace=q126, [UWGC]  
FT /colour=7  
FT misc\_feature 4476070..4476069  
FT /label=NR37.27  
FT /note=NR37.27, Estimate (28), [SBW25 April 05],Plate=P03,  
Coordinates=E6, Trace=q219, [UWGC]  
FT /colour=7  
FT misc\_feature 4476082..4476081  
FT /label=NR37.15  
FT /note=NR37.15, Exact (0), [SBW25 April 05],Plate=P03,  
Coordinates=C6, Trace=q218, [UWGC]  
FT /colour=7  
FT misc\_feature complement(4476103..4476104)  
FT /label=NR37.18  
FT /note=NR37.18, Estimate (0), [SBW25 April 05],Plate=P03,  
Coordinates=C12, Trace=q242, [UWGC]  
FT /colour=7  
FT misc\_feature complement(4476103..4476104)  
FT /label=NR37.56  
FT /note=NR37.56, Exact (0), [SBW25 April 05],Plate=P03,  
Coordinates=I16, Trace=q261, [UWGC]  
FT /colour=7  
FT misc\_feature 4476107..4476106  
FT /label=NR37.25  
FT /note=NR37.25, Estimate (79), [SBW25 April 05],Plate=P03,  
Coordinates=E2, Trace=q203, [UWGC]  
FT /colour=7  
FT misc\_feature complement(4476110..4476111)  
FT /label=NR37.30  
FT /note=NR37.30, Exact (0), [SBW25 April 05],Plate=P03,  
Coordinates=E12, Trace=q243, [UWGC]  
FT /colour=7  
FT misc\_feature 4476115..4476114  
FT /label=NR37.04  
FT /note=NR37.04, Estimate (29), UWGC re-mapped on dapB  
deleted genome, [SBW25 April 05],Plate=P03, Coordinates=A8, Trace=q225, [UWGC]  
FT /colour=7  
FT misc\_feature complement(4476115..4476116)  
FT /label=NR37.08  
FT /note=NR37.08, Exact (0), [SBW25 April 05],Plate=P03,  
Coordinates=A16, Trace=q257, [UWGC]

FT /colour=7  
 FT misc\_feature complement(4476115..4476116)  
 FT /label=NR37.70  
 FT /note=NR37.70, Exact (0), [SBW25 April 05],Plate=P03,  
 Coordinates=K20, Trace=q278, [UWGC]  
 FT /colour=7  
 FT misc\_feature complement(4476132..4476133)  
 FT /label=NR37.60  
 FT /note=NR37.60, Exact (0), [SBW25 April 05],Plate=P03,  
 Coordinates=I24, Trace=q293, [UWGC]  
 FT /colour=7  
 FT misc\_feature 4476143..4476142  
 FT /label=NR37.75  
 FT /note=NR37.75, Estimate (3), [SBW25 April 05],Plate=P03,  
 Coordinates=M6, Trace=q223, [UWGC]  
 FT /colour=7  
 FT misc\_feature complement(4476143..4476144)  
 FT /label=NR37.85  
 FT /note=NR37.85, Estimate (28), [SBW25 April 05],Plate=P03,  
 Coordinates=O2, Trace=q208, [UWGC]  
 FT /colour=7  
 FT misc\_feature 4476144..4476143  
 FT /label=NR37.38  
 FT /note=NR37.38, Exact (0), [SBW25 April 05],Plate=P03,  
 Coordinates=G4, Trace=q212, [UWGC]  
 FT /colour=7  
 FT misc\_feature complement(4476144..4476145)  
 FT /label=NR37.37  
 FT /note=NR37.37, Estimate (29), [SBW25 April 05],Plate=P03,  
 Coordinates=G2, Trace=q204, [UWGC]  
 FT /colour=7  
 FT misc\_feature complement(4476148..4476149)  
 FT /label=NR37.42  
 FT /note=NR37.42, Exact (0), [SBW25 April 05],Plate=P03,  
 Coordinates=G12, Trace=q244, [UWGC]  
 FT /colour=7  
 FT misc\_feature complement(4476154..4476155)  
 FT /label=NR37.05  
 FT /note=NR37.05, Estimate (29), [SBW25 April 05],Plate=P03,  
 Coordinates=A10, Trace=q233, [UWGC]  
 FT /colour=7  
 FT misc\_feature complement(4476160..4476161)  
 FT /label=NR37.03  
 FT /note=NR37.03, Exact (0), [SBW25 April 05],Plate=P03,  
 Coordinates=A6, Trace=q217, [UWGC]  
 FT /colour=7  
 FT misc\_feature 4476166..4476165  
 FT /label=NR37.P11  
 FT /note=NR37.P11, Exact (0), [SBW25 April 05],Plate=P06,  
 Coordinates=C9, Trace=q134, [UWGC]  
 FT /colour=7  
 FT misc\_feature complement(4476172..4476173)  
 FT /label=NR37.52  
 FT /note=NR37.52, Exact (0), [SBW25 April 05],Plate=P03,  
 Coordinates=I8, Trace=q229, [UWGC]  
 FT /colour=7  
 FT misc\_feature 4476180..4476179

FT /label=NR37.54  
 FT /note=NR37.54, Exact (0), [SBW25 April 05],Plate=P03,  
 Coordinates=I12, Trace=q245, [UWGC]  
 FT /colour=7  
 FT misc\_feature complement(4476191..4476192)  
 FT /label=NR37.13  
 FT /note=NR37.13, Exact (0), [SBW25 April 05],Plate=P03,  
 Coordinates=C2, Trace=q202, [UWGC]  
 FT /colour=7  
 FT misc\_feature complement(4476196..4476197)  
 FT /label=NR37.53  
 FT /note=NR37.53, Estimate (29), [SBW25 April 05],Plate=P03,  
 Coordinates=I10, Trace=q237, [UWGC]  
 FT /colour=7  
 FT misc\_feature complement(4476196..4476197)  
 FT /label=NR37.77  
 FT /note=NR37.77, Exact (0), [SBW25 April 05],Plate=P03,  
 Coordinates=M10, Trace=q239, [UWGC]  
 FT /colour=7  
 FT misc\_feature 4476201..4476200  
 FT /label=NR37.M5.01  
 FT /note=NR37.M5.01, Exact (0), [SBW25 April 05],Plate=PM5.1,  
 Coordinates=H6, Trace=C494, [Oxford]  
 FT /colour=10  
 FT misc\_feature complement(4476239..4476240)  
 FT /label=NR37.39  
 FT /note=NR37.39, Estimate (27), [SBW25 April 05],Plate=P03,  
 Coordinates=G6, Trace=q220, [UWGC]  
 FT /colour=7  
 FT misc\_feature 4476244..4476243  
 FT /label=NR37.17  
 FT /note=NR37.17, Exact (0), [SBW25 April 05],Plate=P03,  
 Coordinates=C10, Trace=q234, [UWGC]  
 FT /colour=7  
 FT misc\_feature 4476259..4476258  
 FT /label=NR37.14  
 FT /note=NR37.14, Exact (0), [SBW25 April 05],Plate=P03,  
 Coordinates=C4, Trace=q210, [UWGC]  
 FT /colour=7  
 FT misc\_feature complement(4476272..4476273)  
 FT /label=NR37.06  
 FT /note=NR37.06, Estimate (26), [SBW25 April 05],Plate=P03,  
 Coordinates=A12, Trace=q241, [UWGC]  
 FT /colour=7  
 FT misc\_feature 4476292..4476291  
 FT /label=NR37.23  
 FT /note=NR37.23, Estimate (32), UWGC re-mapped on dapB  
 deleted genome, [SBW25 April 05],Plate=P03, Coordinates=C22, Trace=q282, [UWGC]  
 FT /colour=7  
 FT misc\_feature 4476298..4476297  
 FT /label=NR37.10  
 FT /note=NR37.10, Estimate (26), UWGC re-mapped on dapB  
 deleted genome, [SBW25 April 05],Plate=P03, Coordinates=A20, Trace=q273, [UWGC]  
 FT /colour=7  
 FT misc\_feature complement(4476303..4476304)  
 FT /label=NR37.26

FT /note=NR37.26, Estimate (33), [SBW25 April 05],Plate=P03,  
 Coordinates=E4, Trace=q211, [UWGC]  
 FT /colour=7  
 FT misc\_feature complement(4476309..4476310)  
 FT /label=NR37.16  
 FT /note=NR37.16, Exact (0), [SBW25 April 05],Plate=P03,  
 Coordinates=C8, Trace=q226, [UWGC]  
 FT /colour=7  
 FT misc\_feature 4476328..4476327  
 FT /label=NR37.07  
 FT /note=NR37.07, Exact (0), UWGC re-mapped on dapB deleted  
 genome, [SBW25 April 05],Plate=P03, Coordinates=A14, Trace=q249, [UWGC]  
 FT /colour=7  
 FT misc\_feature complement(4476336..4476337)  
 FT /label=NR37.93  
 FT /note=NR37.93, Exact (0), [SBW25 April 05],Plate=P03,  
 Coordinates=O18, Trace=q272, [UWGC]  
 FT /colour=7  
 FT misc\_feature complement(4503024..4503025)  
 FT /label=NR35.71  
 FT /note=NR35.71, Estimate (246), [SBW25 April 05],Plate=P03,  
 Coordinates=K21, Trace=q186, [UWGC]  
 FT /colour=7  
 FT misc\_feature 4581801..4581800  
 FT /label=NR54.P07  
 FT /note=NR54.P07, Exact (manual correction), [SBW25 April  
 05],Plate=P06, Coordinates=C13, Trace=q150, [UWGC]  
 FT /colour=7  
 FT misc\_feature complement(4595434..4595435)  
 FT /label=NR04.97  
 FT /note=NR04.97, Estimate (1), [SBW25 April 05],Plate=P07,  
 Coordinates=A01, Trace=q101, [UWGC]  
 FT /colour=7  
 FT misc\_feature 4690633..4690632  
 FT /label=NR12.47  
 FT /note=NR12.47, Exact (0), [SBW25 April 05],Plate=P01,  
 Coordinates=G22, Trace=q284, [UWGC]  
 FT /colour=7  
 FT misc\_feature 4698959..4698960  
 FT /label=NR50.31  
 FT /note=NR50.31,MCS hit =  
 GATCTGCAGGTCGAGCG^CTTAATTAAGTTCGAGTTGGGTATG, [SBW25 April 05],Plate=P04,  
 Coordinates=F14, Trace=q451, [UWGC]  
 FT /colour=7  
 FT misc\_feature 4698978..4698977  
 FT /label=NR50.83  
 FT /note=NR50.83, Exact (0), [SBW25 April 05],Plate=P04,  
 Coordinates=N22, Trace=q487, [UWGC]  
 FT /colour=7  
 FT misc\_feature complement(4698978..4698979)  
 FT /label=NR50.M5.01  
 FT /note=NR50.M5.01, Exact (0), [SBW25 April 05],Plate=PM5.2,  
 Coordinates=C3, Trace=C562, [Oxford]  
 FT /colour=10  
 FT misc\_feature complement(4698989..4698990)  
 FT /label=NR50.84

FT /note=NR50.84, Exact (0), UWGC re-mapped on dapB deleted  
 genome, [SBW25 April 05],Plate=P04, Coordinates=N24, Trace=q495, [UWGC]  
 FT /colour=7  
 FT misc\_feature 4698994..4698995  
 FT /label=NR50.34  
 FT /note=NR50.34, Exact (manual correction), [SBW25 April  
 05],Plate=P04, Coordinates=F20, Trace=q475, [UWGC]  
 FT /colour=7  
 FT misc\_feature 4698999..4698998  
 FT /label=NR50.02  
 FT /note=NR50.02, Exact (0), [SBW25 April 05],Plate=P04,  
 Coordinates=B4, Trace=NR50\_02, [Oxford]  
 FT /colour=7  
 FT misc\_feature 4698999..4698998  
 FT /label=NR50.23  
 FT /note=NR50.23, Exact (0), [SBW25 April 05],Plate=P04,  
 Coordinates=D22, Trace=q482, [UWGC]  
 FT /colour=7  
 FT misc\_feature 4698999..4698998  
 FT /label=NR50.33  
 FT /note=NR50.33, Exact (0), [SBW25 April 05],Plate=P04,  
 Coordinates=F18, Trace=q467, [UWGC]  
 FT /colour=7  
 FT misc\_feature 4698999..4698998  
 FT /label=NR50.69  
 FT /note=NR50.69, Exact (0), [SBW25 April 05],Plate=P04,  
 Coordinates=L18, Trace=q470, [UWGC]  
 FT /colour=7  
 FT misc\_feature 4699004..4699003  
 FT /label=NR50.89  
 FT /note=NR50.89, Exact (0), [SBW25 April 05],Plate=P04,  
 Coordinates=P10, Trace=q440, [UWGC]  
 FT /colour=7  
 FT misc\_feature 4699004..4699003  
 FT /label=NR50.94  
 FT /note=NR50.94, Estimate (3), [SBW25 April 05],Plate=P04,  
 Coordinates=P20, Trace=q480, [UWGC]  
 FT /colour=7  
 FT misc\_feature complement(4699009..4699010)  
 FT /label=NR50.08  
 FT /note=NR50.08, Estimate (0), UWGC re-mapped on dapB deleted  
 genome, [SBW25 April 05],Plate=P04, Coordinates=B16, Trace=q457, [UWGC]  
 FT /colour=7  
 FT misc\_feature complement(4699010..4699011)  
 FT /label=NR50.05  
 FT /note=NR50.05, Exact (0), UWGC re-mapped on dapB deleted  
 genome, [SBW25 April 05],Plate=P04, Coordinates=B10, Trace=q433, [UWGC]  
 FT /colour=7  
 FT misc\_feature complement(4699010..4699011)  
 FT /label=NR50.28  
 FT /note=NR50.28, Exact (0), UWGC re-mapped on dapB deleted  
 genome, [SBW25 April 05],Plate=P04, Coordinates=F8, Trace=q427, [UWGC]  
 FT /colour=7  
 FT misc\_feature complement(4699010..4699011)  
 FT /label=NR50.37  
 FT /note=NR50.37, Exact (0), UWGC re-mapped on dapB deleted  
 genome, [SBW25 April 05],Plate=P04, Coordinates=H2, Trace=q404, [UWGC]

FT /colour=7  
FT misc\_feature complement(4699010..4699011)  
FT /label=NR50.43  
FT /note=NR50.43, Exact (0), UWGC re-mapped on dapB deleted  
genome, [SBW25 April 05],Plate=P04, Coordinates=H14, Trace=q452, [UWGC]  
FT /colour=7  
FT misc\_feature complement(4699010..4699011)  
FT /label=NR50.66  
FT /note=NR50.66, Exact (0), UWGC re-mapped on dapB deleted  
genome, [SBW25 April 05],Plate=P04, Coordinates=L12, Trace=q446, [UWGC]  
FT /colour=7  
FT misc\_feature complement(4699010..4699011)  
FT /label=NR50.77  
FT /note=NR50.77, Exact (0), UWGC re-mapped on dapB deleted  
genome, [SBW25 April 05],Plate=P04, Coordinates=N10, Trace=q439, [UWGC]  
FT /colour=7  
FT misc\_feature complement(4699015..4699016)  
FT /label=NR50.61  
FT /note=NR50.61, Exact (0), UWGC re-mapped on dapB deleted  
genome, [SBW25 April 05],Plate=P04, Coordinates=L2, Trace=q406, [UWGC]  
FT /colour=7  
FT misc\_feature complement(4699027..4699028)  
FT /label=NR50.15  
FT /note=NR50.15, Exact (0), UWGC re-mapped on dapB deleted  
genome, [SBW25 April 05],Plate=P04, Coordinates=D6, Trace=q418, [UWGC]  
FT /colour=7  
FT misc\_feature complement(4699032..4699033)  
FT /label=NR50.92  
FT /note=NR50.92, Estimate (17), UWGC re-mapped on dapB  
deleted genome, [SBW25 April 05],Plate=P04, Coordinates=P16, Trace=q464, [UWGC]  
FT /colour=7  
FT misc\_feature complement(4699037..4699038)  
FT /label=NR50.52  
FT /note=NR50.52, Estimate (26), UWGC re-mapped on dapB  
deleted genome, [SBW25 April 05],Plate=P04, Coordinates=J8, Trace=q429, [UWGC]  
FT /colour=7  
FT misc\_feature complement(4699040..4699041)  
FT /label=NR50.65  
FT /note=NR50.65, Estimate (29), UWGC re-mapped on dapB  
deleted genome, [SBW25 April 05],Plate=P04, Coordinates=L10, Trace=q438, [UWGC]  
FT /colour=7  
FT misc\_feature 4699041..4699040  
FT /label=NR50.17  
FT /note=NR50.17, Exact (0), [SBW25 April 05],Plate=P04,  
Coordinates=D10, Trace=q434, [UWGC]  
FT /colour=7  
FT misc\_feature 4699055..4699054  
FT /label=NR50.64  
FT /note=NR50.64, Exact (0), [SBW25 April 05],Plate=P04,  
Coordinates=L8, Trace=q430, [UWGC]  
FT /colour=7  
FT misc\_feature complement(4699066..4699067)  
FT /label=NR50.46  
FT /note=NR50.46, Exact (0), [SBW25 April 05],Plate=P04,  
Coordinates=H20, Trace=q476, [UWGC]  
FT /colour=7  
FT misc\_feature 4699068..4699067

FT /label=NR50.41  
FT /note=NR50.41, Estimate (32), [SBW25 April 05],Plate=P04,  
Coordinates=H10, Trace=q436, [UWGC]  
FT /colour=7  
FT misc\_feature 4699069..4699068  
FT /label=NR50.87  
FT /note=NR50.87, Estimate (27), [SBW25 April 05],Plate=P04,  
Coordinates=P6, Trace=q424, [UWGC]  
FT /colour=7  
FT misc\_feature 4699078..4699077  
FT /label=NR50.36  
FT /note=NR50.36, Exact (0), [SBW25 April 05],Plate=P04,  
Coordinates=F24, Trace=q491, [UWGC]  
FT /colour=7  
FT misc\_feature 4699088..4699087  
FT /label=NR50.90  
FT /note=NR50.90, Exact (0), [SBW25 April 05],Plate=P04,  
Coordinates=P12, Trace=q448, [UWGC]  
FT /colour=7  
FT misc\_feature 4699095..4699094  
FT /label=NR50.44  
FT /note=NR50.44, Estimate (30), [SBW25 April 05],Plate=P04,  
Coordinates=H16, Trace=q460, [UWGC]  
FT /colour=7  
FT misc\_feature 4699096..4699095  
FT /label=NR50.93  
FT /note=NR50.93, Exact (0), [SBW25 April 05],Plate=P04,  
Coordinates=P18, Trace=q472, [UWGC]  
FT /colour=7  
FT misc\_feature complement(4699097..4699098)  
FT /label=NR50.22  
FT /note=NR50.22, Estimate (44), [SBW25 April 05],Plate=P04,  
Coordinates=D20, Trace=q474, [UWGC]  
FT /colour=7  
FT misc\_feature complement(4699097..4699098)  
FT /label=NR50.38  
FT /note=NR50.38, Estimate (35), [SBW25 April 05],Plate=P04,  
Coordinates=H4, Trace=q412, [UWGC]  
FT /colour=7  
FT misc\_feature 4699098..4699097  
FT /label=NR50.48  
FT /note=NR50.48, Exact (0), [SBW25 April 05],Plate=P04,  
Coordinates=H24, Trace=q492, [UWGC]  
FT /colour=7  
FT misc\_feature complement(4699099..4699100)  
FT /label=NR50.60  
FT /note=NR50.60, Estimate (66), [SBW25 April 05],Plate=P04,  
Coordinates=J24, Trace=q493, [UWGC]  
FT /colour=7  
FT misc\_feature 4699100..4699099  
FT /label=NR50.86  
FT /note=NR50.86, Exact (0), [SBW25 April 05],Plate=P04,  
Coordinates=P4, Trace=q416, [UWGC]  
FT /colour=7  
FT misc\_feature 4699101..4699100  
FT /label=NR50.16

FT /note=NR50.16, Estimate (0), [SBW25 April 05],Plate=P04,  
Coordinates=D8, Trace=q426, [UWGC]  
FT /colour=7  
FT misc\_feature 4699106..4699105  
FT /label=NR50.09  
FT /note=NR50.09, Exact (0), [SBW25 April 05],Plate=P04,  
Coordinates=B18, Trace=NR50\_09, [Oxford]  
FT /colour=7  
FT misc\_feature 4699106..4699105  
FT /label=NR50.24  
FT /note=NR50.24, Estimate (2), [SBW25 April 05],Plate=P04,  
Coordinates=D24, Trace=q490, [UWGC]  
FT /colour=7  
FT misc\_feature 4699106..4699105  
FT /label=NR50.27  
FT /note=NR50.27, Exact (0), [SBW25 April 05],Plate=P04,  
Coordinates=F6, Trace=q419, [UWGC]  
FT /colour=7  
FT misc\_feature 4699106..4699105  
FT /label=NR50.30  
FT /note=NR50.30, Exact (0), [SBW25 April 05],Plate=P04,  
Coordinates=F12, Trace=q443, [UWGC]  
FT /colour=7  
FT misc\_feature 4699106..4699105  
FT /label=NR50.74  
FT /note=NR50.74, Exact (manual correction), [SBW25 April  
05],Plate=P04, Coordinates=N4, Trace=NR50\_74, [Oxford]  
FT /colour=7  
FT misc\_feature 4699106..4699105  
FT /label=NR50.76  
FT /note=NR50.76, Exact (0), [SBW25 April 05],Plate=P04,  
Coordinates=N8, Trace=q431, [UWGC]  
FT /colour=7  
FT misc\_feature complement(4699112..4699113)  
FT /label=NR50.42  
FT /note=NR50.42, Exact (0), [SBW25 April 05],Plate=P04,  
Coordinates=H12, Trace=q444, [UWGC]  
FT /colour=7  
FT misc\_feature complement(4699112..4699113)  
FT /label=NR50.82  
FT /note=NR50.82, Exact (0), [SBW25 April 05],Plate=P04,  
Coordinates=N20, Trace=q479, [UWGC]  
FT /colour=7  
FT misc\_feature 4699114..4699113  
FT /label=NR50.81  
FT /note=NR50.81, Estimate (19), [SBW25 April 05],Plate=P04,  
Coordinates=N18, Trace=q471, [UWGC]  
FT /colour=7  
FT misc\_feature complement(4699117..4699118)  
FT /label=NR50.78  
FT /note=NR50.78, Exact (0), [SBW25 April 05],Plate=P04,  
Coordinates=N12, Trace=q447, [UWGC]  
FT /colour=7  
FT misc\_feature 4699118..4699117  
FT /label=NR50.80  
FT /note=NR50.80, Exact (0), [SBW25 April 05],Plate=P04,  
Coordinates=N16, Trace=q463, [UWGC]



FT /colour=7  
 FT misc\_feature 4699127..4699126  
 FT /label=NR50.26  
 FT /note=NR50.26, Exact (0), [SBW25 April 05], Plate=P04,  
 Coordinates=F4, Trace=q411, [UWGC]  
 FT /colour=7  
 FT misc\_feature complement(4699127..4699128)  
 FT /label=NR50.96  
 FT /note=NR50.96, Estimate (88), UWGC re-mapped on dapB  
 deleted genome, [SBW25 April 05], Plate=P04, Coordinates=P24, Trace=q496, [UWGC]  
 FT /colour=7  
 FT misc\_feature 4699129..4699128  
 FT /label=NR50.63  
 FT /note=NR50.63, Exact (0), [SBW25 April 05], Plate=P04,  
 Coordinates=L6, Trace=q422, [UWGC]  
 FT /colour=7  
 FT misc\_feature complement(4699129..4699130)  
 FT /label=NR50.79  
 FT /note=NR50.79, Exact (0), [SBW25 April 05], Plate=P04,  
 Coordinates=N14, Trace=q455, [UWGC]  
 FT /colour=7  
 FT misc\_feature complement(4699138..4699139)  
 FT /label=NR50.29  
 FT /note=NR50.29, Estimate (27), UWGC re-mapped on dapB  
 deleted genome, [SBW25 April 05], Plate=P04, Coordinates=F10, Trace=q435, [UWGC]  
 FT /colour=7  
 FT misc\_feature complement(4699139..4699140)  
 FT /label=NR50.07  
 FT /note=NR50.07, Exact (0), [SBW25 April 05], Plate=P04,  
 Coordinates=B14, Trace=q449, [UWGC]  
 FT /colour=7  
 FT misc\_feature complement(4699145..4699146)  
 FT /label=NR50.73  
 FT /note=NR50.73, Estimate (16), UWGC re-mapped on dapB  
 deleted genome, [SBW25 April 05], Plate=P04, Coordinates=N2, Trace=q407, [UWGC]  
 FT /colour=7  
 FT misc\_feature complement(4699146..4699147)  
 FT /label=NR50.71  
 FT /note=NR50.71, Estimate (29), UWGC re-mapped on dapB  
 deleted genome, [SBW25 April 05], Plate=P04, Coordinates=L22, Trace=q486, [UWGC]  
 FT /colour=7  
 FT misc\_feature complement(4699149..4699150)  
 FT /label=NR50.47  
 FT /note=NR50.47, Estimate (37), UWGC re-mapped on dapB  
 deleted genome, [SBW25 April 05], Plate=P04, Coordinates=H22, Trace=q484, [UWGC]  
 FT /colour=7  
 FT misc\_feature 4699164..4699163  
 FT /label=NR50.06  
 FT /note=NR50.06, Exact (manual correction), [SBW25 April  
 05], Plate=P04, Coordinates=B12, Trace=NR50\_06, [Oxford]  
 FT /colour=7  
 FT misc\_feature 4699164..4699163  
 FT /label=NR50.45  
 FT /note=NR50.45, Exact (0), [SBW25 April 05], Plate=P04,  
 Coordinates=H18, Trace=q468, [UWGC]  
 FT /colour=7  
 FT misc\_feature complement(4699175..4699176)

FT /label=NR50.75  
FT /note=NR50.75, Exact (0), [SBW25 April 05],Plate=P04,  
Coordinates=N6, Trace=q423, [UWGC]  
FT /colour=7  
FT misc\_feature complement(4699175..4699176)  
FT /label=NR50.M5.02  
FT /note=NR50.M5.02, Exact (0), [SBW25 April 05],Plate=PM5.2,  
Coordinates=C4, Trace=C570, [Oxford]  
FT /colour=10  
FT misc\_feature complement(4699175..4699176)  
FT /label=NR50.M5.03  
FT /note=NR50.M5.03, Exact (0), [SBW25 April 05],Plate=PM5.2,  
Coordinates=C5, Trace=C578, [Oxford]  
FT /colour=10  
FT misc\_feature 4699180..4699179  
FT /label=NR50.20  
FT /note=NR50.20, Exact (manual correction), [SBW25 April  
05],Plate=P04, Coordinates=D16, Trace=NR50\_20, [Oxford]  
FT /colour=7  
FT misc\_feature complement(4699181..4699182)  
FT /label=NR50.51  
FT /note=NR50.51, Estimate (1), [SBW25 April 05],Plate=P04,  
Coordinates=J6, Trace=q421, [UWGC]  
FT /colour=7  
FT misc\_feature complement(4699182..4699183)  
FT /label=NR50.04  
FT /note=NR50.04, Exact (0), [SBW25 April 05],Plate=P04,  
Coordinates=B8, Trace=q425, [UWGC]  
FT /colour=7  
FT misc\_feature 4699184..4699183  
FT /label=NR50.21  
FT /note=NR50.21, Estimate (2), [SBW25 April 05],Plate=P04,  
Coordinates=D18, Trace=q466, [UWGC]  
FT /colour=7  
FT misc\_feature complement(4699185..4699186)  
FT /label=NR50.01  
FT /note=NR50.01, Exact (0), [SBW25 April 05],Plate=P04,  
Coordinates=B2, Trace=NR50\_01, [Oxford]  
FT /colour=7  
FT misc\_feature 4699223..4699222  
FT /label=NR50.72  
FT /note=NR50.72, Estimate (124), [SBW25 April 05],Plate=P04,  
Coordinates=L24, Trace=q494, [UWGC]  
FT /colour=7  
FT misc\_feature complement(4699231..4699232)  
FT /label=NR50.14  
FT /note=NR50.14, Exact (0), [SBW25 April 05],Plate=P04,  
Coordinates=D4, Trace=q410, [UWGC]  
FT /colour=7  
FT misc\_feature complement(4699236..4699237)  
FT /label=NR50.58  
FT /note=NR50.58, Exact (0), [SBW25 April 05],Plate=P04,  
Coordinates=J20, Trace=q477, [UWGC]  
FT /colour=7  
FT misc\_feature complement(4699246..4699247)  
FT /label=NR50.40

FT /note=NR50.40, Exact (0), [SBW25 April 05],Plate=P04,  
Coordinates=H8, Trace=q428, [UWGC]  
FT /colour=7  
FT misc\_feature 4699255..4699254  
FT /label=NR50.54  
FT /note=NR50.54, Estimate (9), [SBW25 April 05],Plate=P04,  
Coordinates=J12, Trace=q445, [UWGC]  
FT /colour=7  
FT misc\_feature complement(4699259..4699260)  
FT /label=NR50.03  
FT /note=NR50.03, Estimate (4), [SBW25 April 05],Plate=P04,  
Coordinates=B6, Trace=NR50\_03, [Oxford]  
FT /colour=7  
FT misc\_feature complement(4699271..4699272)  
FT /label=NR50.12  
FT /note=NR50.12, Estimate (0), [SBW25 April 05],Plate=P04,  
Coordinates=B24, Trace=NR50\_12, [Oxford]  
FT /colour=7  
FT misc\_feature 4699275..4699274  
FT /label=NR50.53  
FT /note=NR50.53, Exact (0), [SBW25 April 05],Plate=P04,  
Coordinates=J10, Trace=q437, [UWGC]  
FT /colour=7  
FT misc\_feature complement(4699309..4699310)  
FT /label=NR50.59  
FT /note=NR50.59, Exact (0), [SBW25 April 05],Plate=P04,  
Coordinates=J22, Trace=q485, [UWGC]  
FT /colour=7  
FT misc\_feature complement(4699310..4699311)  
FT /label=NR50.91  
FT /note=NR50.91, Exact (0), [SBW25 April 05],Plate=P04,  
Coordinates=P14, Trace=q456, [UWGC]  
FT /colour=7  
FT misc\_feature complement(4699317..4699318)  
FT /label=NR50.10  
FT /note=NR50.10, Estimate (3), [SBW25 April 05],Plate=P04,  
Coordinates=B20, Trace=NR50\_10, [Oxford]  
FT /colour=7  
FT misc\_feature complement(4699332..4699333)  
FT /label=NR50.49  
FT /note=NR50.49, Exact (0), [SBW25 April 05],Plate=P04,  
Coordinates=J2, Trace=q405, [UWGC]  
FT /colour=7  
FT misc\_feature complement(4699343..4699344)  
FT /label=NR50.18  
FT /note=NR50.18, Estimate (66), [SBW25 April 05],Plate=P04,  
Coordinates=D12, Trace=q442, [UWGC]  
FT /colour=7  
FT misc\_feature complement(4699343..4699344)  
FT /label=NR50.39  
FT /note=NR50.39, Estimate (33), [SBW25 April 05],Plate=P04,  
Coordinates=H6, Trace=q420, [UWGC]  
FT /colour=7  
FT misc\_feature complement(4699343..4699344)  
FT /label=NR50.55  
FT /note=NR50.55, Estimate (33), [SBW25 April 05],Plate=P04,  
Coordinates=J14, Trace=q453, [UWGC]

FT /colour=7  
FT misc\_feature complement(4699343..4699344)  
FT /label=NR50.67  
FT /note=NR50.67, Estimate (33), [SBW25 April 05],Plate=P04,  
Coordinates=L14, Trace=q454, [UWGC]  
FT /colour=7  
FT misc\_feature complement(4699344..4699345)  
FT /label=NR50.19  
FT /note=NR50.19, Estimate (34), [SBW25 April 05],Plate=P04,  
Coordinates=D14, Trace=q450, [UWGC]  
FT /colour=7  
FT misc\_feature 4699347..4699346  
FT /label=NR50.70  
FT /note=NR50.70, Estimate (0), [SBW25 April 05],Plate=P04,  
Coordinates=L20, Trace=q478, [UWGC]  
FT /colour=7  
FT misc\_feature complement(4699356..4699357)  
FT /label=NR50.85  
FT /note=NR50.85, Exact (0), [SBW25 April 05],Plate=P04,  
Coordinates=P2, Trace=q408, [UWGC]  
FT /colour=7  
FT misc\_feature complement(4699369..4699370)  
FT /label=NR50.13  
FT /note=NR50.13, Exact (0), [SBW25 April 05],Plate=P04,  
Coordinates=D2, Trace=q402, [UWGC]  
FT /colour=7  
FT misc\_feature 4699390..4699389  
FT /label=NR50.32  
FT /note=NR50.32, Exact (0), [SBW25 April 05],Plate=P04,  
Coordinates=F16, Trace=q459, [UWGC]  
FT /colour=7  
FT misc\_feature 4699390..4699389  
FT /label=NR50.57  
FT /note=NR50.57, Estimate (0), [SBW25 April 05],Plate=P04,  
Coordinates=J18, Trace=q469, [UWGC]  
FT /colour=7  
FT misc\_feature complement(4699416..4699417)  
FT /label=NR50.88  
FT /note=NR50.88, Exact (0), [SBW25 April 05],Plate=P04,  
Coordinates=P8, Trace=q432, [UWGC]  
FT /colour=7  
FT misc\_feature complement(4699429..4699430)  
FT /label=NR50.56  
FT /note=NR50.56, Exact (0), [SBW25 April 05],Plate=P04,  
Coordinates=J16, Trace=q461, [UWGC]  
FT /colour=7  
FT misc\_feature complement(4699451..4699452)  
FT /label=NR50.68  
FT /note=NR50.68, Estimate (26), [SBW25 April 05],Plate=P04,  
Coordinates=L16, Trace=q462, [UWGC]  
FT /colour=7  
FT misc\_feature complement(4699464..4699465)  
FT /label=NR50.11  
FT /note=NR50.11, Exact (0), [SBW25 April 05],Plate=P04,  
Coordinates=B22, Trace=NR50\_11, [Oxford]  
FT /colour=7  
FT misc\_feature complement(4715516..4715517)

FT /label=NR12.07  
 FT /note=NR12.07, Exact (0), [SBW25 April 05],Plate=P01,  
 Coordinates=A14, Trace=q249, [UWGC]  
 FT /colour=7  
 FT misc\_feature 4726105..4726104  
 FT /label=NR04.M5.04  
 FT /note=NR04.M5.04, Exact (0), [SBW25 April 05],Plate=PM5.1,  
 Coordinates=A4, Trace=C471, [Oxford]  
 FT /colour=10  
 FT misc\_feature complement(4748057..4748058)  
 FT /label=NR55.M5.05  
 FT /note=NR55.M5.05, Exact (0), [SBW25 April 05],Plate=PM5.2,  
 Coordinates=G4, Trace=C574, [Oxford]  
 FT /colour=10  
 FT misc\_feature 4760903..4760902  
 FT /label=NR09.18  
 FT /note=NR09.18, Estimate (26), [SBW25 April 05],Plate=P07,  
 Coordinates=L04, Trace=q414, [UWGC]  
 FT /colour=7  
 FT misc\_feature complement(4791407..4791408)  
 FT /label=NR55.M5.03  
 FT /note=NR55.M5.03, Exact (probable), [SBW25 April  
 05],Plate=PM5.2, Coordinates=G2, Trace=C558, [Oxford]  
 FT /colour=10  
 FT misc\_feature complement(4814172..4814173)  
 FT /label=NR12.20  
 FT /note=NR12.20, Exact (0), [SBW25 April 05],Plate=P01,  
 Coordinates=C16, Trace=q258, [UWGC]  
 FT /colour=7  
 FT misc\_feature complement(4823539..4823540)  
 FT /label=NR12.95  
 FT /note=NR12.95, Exact (0), [SBW25 April 05],Plate=P01,  
 Coordinates=O22, Trace=q288, [UWGC]  
 FT /colour=7  
 FT misc\_feature complement(4875453..4875454)  
 FT /label=NR51.34  
 FT /note=NR51.34, Estimate (370), [SBW25 April 05],Plate=P07,  
 Coordinates=C20, Trace=q274, [UWGC]  
 FT /colour=7  
 FT misc\_feature complement(4875510..4875511)  
 FT /label=NR32.35  
 FT /note=NR32.35, Estimate (427), UWGC re-mapped on dapB  
 deleted genome, [SBW25 April 05],Plate=P02, Coordinates=E22, Trace=q283, [UWGC]  
 FT /colour=7  
 FT misc\_feature complement(4907190..4907191)  
 FT /label=NR09.M5.18  
 FT /note=NR09.M5.18, Exact (0), [SBW25 April 05],Plate=PM5.1,  
 Coordinates=D2, Trace=C458, [Oxford]  
 FT /colour=10  
 FT misc\_feature 4907200..4907199  
 FT /label=NR09.M5.10  
 FT /note=NR09.M5.10, Exact (0), [SBW25 April 05],Plate=PM5.1,  
 Coordinates=C6, Trace=C489, [Oxford]  
 FT /colour=10  
 FT misc\_feature complement(4907226..4907227)  
 FT /label=NR09.P03

FT /note=NR09.P03, Exact (0), [SBW25 April 05],Plate=P06,  
 Coordinates=I5, Trace=NR9\_P03, [Oxford]  
 FT /colour=7  
 FT misc\_feature complement(4907283..4907284)  
 FT /label=NR09.05  
 FT /note=NR09.05, Exact (0), [SBW25 April 05],Plate=,  
 Coordinates=, Trace=NR9\_05, [Oxford]  
 FT /colour=7  
 FT misc\_feature 4907417..4907416  
 FT /label=NR09.P09  
 FT /note=NR09.P09, Exact (manual correction), [SBW25 April  
 05],Plate=P06, Coordinates=K5, Trace=NR9\_P09, [UWGC]  
 FT /colour=7  
 FT misc\_feature complement(4907428..4907429)  
 FT /label=NR09.M5.05  
 FT /note=NR09.M5.05, Exact (0), [SBW25 April 05],Plate=PM5.1,  
 Coordinates=C1, Trace=C438, [Oxford]  
 FT /colour=10  
 FT misc\_feature 4907781..4907780  
 FT /label=NR09.M5.17  
 FT /note=NR09.M5.17, Exact (0), [SBW25 April 05],Plate=PM5.1,  
 Coordinates=D1, Trace=C439, [Oxford]  
 FT /colour=10  
 FT misc\_feature complement(4908031..4908032)  
 FT /label=NR09.M5.03  
 FT /note=NR09.M5.03, Exact (0), [SBW25 April 05],Plate=PM5.1,  
 Coordinates=B11, Trace=C528, [Oxford]  
 FT /colour=10  
 FT misc\_feature complement(4908118..4908119)  
 FT /label=NR09.M5.11  
 FT /note=NR09.M5.11, Exact (0), [SBW25 April 05],Plate=PM5.1,  
 Coordinates=C7, Trace=C497, [Oxford]  
 FT /colour=10  
 FT misc\_feature complement(4908197..4908198)  
 FT /label=NR09.P04  
 FT /note=NR09.P04, Exact (0), [SBW25 April 05],Plate=P06,  
 Coordinates=I7, Trace=NR9\_P04, [Oxford]  
 FT /colour=7  
 FT misc\_feature complement(4908209..4908210)  
 FT /label=NR09.P12  
 FT /note=NR09.P12, Exact (0), [SBW25 April 05],Plate=P06,  
 Coordinates=K11, Trace=NR9\_P12, [Oxford]  
 FT /colour=7  
 FT misc\_feature 4908349..4908348  
 FT /label=NR09.P05  
 FT /note=NR09.P05, Exact (0), [SBW25 April 05],Plate=P06,  
 Coordinates=I9, Trace=NR9\_P05, [Oxford]  
 FT /colour=7  
 FT misc\_feature complement(4908399..4908400)  
 FT /label=NR09.68  
 FT /note=NR09.68, Estimate (286), [SBW25 April 05],Plate=P07,  
 Coordinates=N07, Trace=q331, [UWGC]  
 FT /colour=7  
 FT misc\_feature 4946238..4946237  
 FT /label=NR54.M5.08  
 FT /note=NR54.M5.08, Exact (0), [SBW25 April 05],Plate=PM5.2,  
 Coordinates=E10, Trace=C620, [Oxford]

FT /colour=10  
FT misc\_feature complement(4985920..4985921)  
FT /label=NR20.27  
FT /note=NR20.27, Exact (0), [SBW25 April 05],Plate=P07,  
Coordinates=O10, Trace=q240, [UWGC]  
FT /colour=7  
FT misc\_feature complement(4986260..4986261)  
FT /label=NR20.15  
FT /note=NR20.15, Estimate (10), [SBW25 April 05],Plate=P07,  
Coordinates=C10, Trace=q234, [UWGC]  
FT /colour=7  
FT misc\_feature complement(4986298..4986299)  
FT /label=NR20.11  
FT /note=NR20.11, Estimate (8), [SBW25 April  
05],Plate=Oxford, Coordinates=0, Trace=NR20\_11, [Oxford]  
FT /colour=7  
FT misc\_feature complement(4986306..4986307)  
FT /label=NR20.13  
FT /note=NR20.13, Exact (0), [SBW25 April 05],Plate=P07,  
Coordinates=A10, Trace=q233, [UWGC]  
FT /colour=7  
FT misc\_feature complement(4986306..4986307)  
FT /label=NR20.34  
FT /note=NR20.34, Exact (0), [SBW25 April 05],Plate=P07,  
Coordinates=F11, Trace=q343, [UWGC]  
FT /colour=7  
FT misc\_feature complement(4986316..4986317)  
FT /label=NR20.26  
FT /note=NR20.26, Estimate (2), [SBW25 April 05],Plate=P07,  
Coordinates=N10, Trace=q439, [UWGC]  
FT /colour=7  
FT misc\_feature complement(4986316..4986317)  
FT /label=NR20.30  
FT /note=NR20.30, Exact (0), [SBW25 April 05],Plate=P07,  
Coordinates=B11, Trace=q341, [UWGC]  
FT /colour=7  
FT misc\_feature complement(4986317..4986318)  
FT /label=NR20.09  
FT /note=NR20.09, Exact (0), [SBW25 April 05],Plate=Oxford,  
Coordinates=0, Trace=NR20\_09, [Oxford]  
FT /colour=7  
FT misc\_feature complement(4986340..4986341)  
FT /label=NR20.25  
FT /note=NR20.25, Exact (0), [SBW25 April 05],Plate=P07,  
Coordinates=M10, Trace=q239, [UWGC]  
FT /colour=7  
FT misc\_feature complement(4986348..4986349)  
FT /label=NR20.06  
FT /note=NR20.06, Exact (0), [SBW25 April 05],Plate=Oxford,  
Coordinates=0, Trace=NR20\_06, [Oxford]  
FT /colour=7  
FT misc\_feature complement(4986348..4986349)  
FT /label=NR20.08  
FT /note=NR20.08, Exact (0), [SBW25 April 05],Plate=Oxford,  
Coordinates=0, Trace=NR20\_08, [Oxford]  
FT /colour=7  
FT misc\_feature complement(4986349..4986350)

FT /label=NR20.22  
FT /note=NR20.22, Estimate (35), [SBW25 April 05],Plate=P07,  
Coordinates=J10, Trace=q437, [UWGC]  
FT /colour=7  
FT misc\_feature complement(4986350..4986351)  
FT /label=NR20.16  
FT /note=NR20.16, Estimate (132), [SBW25 April 05],Plate=P07,  
Coordinates=D10, Trace=q434, [UWGC]  
FT /colour=7  
FT misc\_feature complement(4986354..4986355)  
FT /label=NR20.21  
FT /note=NR20.21, Exact (0), [SBW25 April 05],Plate=P07,  
Coordinates=I10, Trace=q237, [UWGC]  
FT /colour=7  
FT misc\_feature complement(4986390..4986391)  
FT /label=NR20.18  
FT /note=NR20.18, Exact (0), [SBW25 April 05],Plate=P07,  
Coordinates=F10, Trace=q435, [UWGC]  
FT /colour=7  
FT misc\_feature complement(4986557..4986558)  
FT /label=NR20.01  
FT /note=NR20.01, Estimate (60), [SBW25 April  
05],Plate=Oxford, Coordinates=0, Trace=NR20\_01, [Oxford]  
FT /colour=7  
FT misc\_feature complement(4986577..4986578)  
FT /label=NR20.07  
FT /note=NR20.07, Estimate (19), [SBW25 April  
05],Plate=Oxford, Coordinates=0, Trace=NR20\_07, [Oxford]  
FT /colour=7  
FT misc\_feature 4986609..4986608  
FT /label=NR20.33  
FT /note=NR20.33, Estimate (27), [SBW25 April 05],Plate=P07,  
Coordinates=E11, Trace=q143, [UWGC]  
FT /colour=7  
FT misc\_feature complement(4986610..4986611)  
FT /label=NR20.20  
FT /note=NR20.20, Exact (0), [SBW25 April 05],Plate=P07,  
Coordinates=H10, Trace=q436, [UWGC]  
FT /colour=7  
FT misc\_feature complement(4986611..4986612)  
FT /label=NR20.10  
FT /note=NR20.10, Estimate (1), [SBW25 April  
05],Plate=Oxford, Coordinates=0, Trace=NR20\_10, [Oxford]  
FT /colour=7  
FT misc\_feature complement(4986611..4986612)  
FT /label=NR20.17  
FT /note=NR20.17, Exact (0), [SBW25 April 05],Plate=P07,  
Coordinates=E10, Trace=q235, [UWGC]  
FT /colour=7  
FT misc\_feature complement(4986611..4986612)  
FT /label=NR20.28  
FT /note=NR20.28, Exact (0), [SBW25 April 05],Plate=P07,  
Coordinates=P10, Trace=q440, [UWGC]  
FT /colour=7  
FT misc\_feature 4986637..4986636  
FT /label=NR20.M5.01



FT /note=NR20.M5.01, Exact (0), [SBW25 April 05],Plate=PM5.1,  
 Coordinates=E9, Trace=C515, [Oxford]  
 FT /colour=10  
 FT misc\_feature complement(4986641..4986642)  
 FT /label=NR20.03  
 FT /note=NR20.03, Estimate (4), [SBW25 April  
 05],Plate=Oxford, Coordinates=0, Trace=NR20\_03, [Oxford]  
 FT /colour=7  
 FT misc\_feature 4986647..4986646  
 FT /label=NR20.02  
 FT /note=NR20.02, Exact (manual correction), [SBW25 April  
 05],Plate=Oxford, Coordinates=0, Trace=NR20\_02, [Oxford]  
 FT /colour=7  
 FT misc\_feature 4986667..4986666  
 FT /label=NR20.M5.03  
 FT /note=NR20.M5.03,MCS hit  
 =GATCTGCAGGTCGAGCGCTTAATTAAGTTCAGTTGGGTATG, [SBW25 April 05],Plate=PM5.1,  
 Coordinates=E11, Trace=C531, [Oxford]  
 FT /colour=10  
 FT misc\_feature complement(4986681..4986682)  
 FT /label=NR20.24  
 FT /note=NR20.24, Estimate (13), [SBW25 April 05],Plate=P07,  
 Coordinates=L10, Trace=q438, [UWGC]  
 FT /colour=7  
 FT misc\_feature complement(4986691..4986692)  
 FT /label=NR20.12  
 FT /note=NR20.12, Estimate (23), [SBW25 April 05],Plate=P07,  
 Coordinates=P09, Trace=q340, [UWGC]  
 FT /colour=7  
 FT misc\_feature complement(5049212..5049213)  
 FT /label=NR12.P03  
 FT /note=NR12.P03, Exact (0), [SBW25 April 05],Plate=P06,  
 Coordinates=M5, Trace=q123, [UWGC]  
 FT /colour=7  
 FT misc\_feature 5092883..5092882  
 FT /label=NR12.58  
 FT /note=NR12.58, Exact (0), [SBW25 April 05],Plate=P01,  
 Coordinates=I20, Trace=q277, [UWGC]  
 FT /colour=7  
 FT misc\_feature 5101396..5101395  
 FT /label=NR54.107  
 FT /note=NR54.107, Estimate (12), [SBW25 April 05],Plate=P07,  
 Coordinates=H23, Trace=q392, [UWGC]  
 FT /colour=7  
 FT misc\_feature complement(5110774..5110775)  
 FT /label=NR12.P08  
 FT /note=NR12.P08, Estimate (36), [SBW25 April 05],Plate=P06,  
 Coordinates=O3, Trace=q116, [UWGC]  
 FT /colour=7  
 FT misc\_feature complement(5135516..5135517)  
 FT /label=NR31.65  
 FT /note=NR31.65, Estimate (839), [SBW25 April 05],Plate=P02,  
 Coordinates=K9, Trace=q138, [UWGC]  
 FT /colour=7  
 FT misc\_feature 5161206..5161205  
 FT /label=NR30.30

FT /note=NR30.30, Estimate (127), [SBW25 April 05],Plate=P01,  
Coordinates=F12, Trace=q443, [UWGC]  
FT /colour=7  
FT misc\_feature complement(5163984..5163985)  
FT /label=NR39.12  
FT /note=NR39.12, Exact (manual correction), [SBW25 April  
05],Plate=P05, Coordinates=D23, Trace=q390, [UWGC]  
FT /colour=7  
FT misc\_feature 5185528..5185527  
FT /label=NR04.101  
FT /note=NR04.101, Exact (0), [SBW25 April 05],Plate=P07,  
Coordinates=E01, Trace=q103, [UWGC]  
FT /colour=7  
FT misc\_feature complement(5212114..5212115)  
FT /label=NR04.35  
FT /note=NR04.35, Estimate (357), [SBW25 April 05],Plate=P01,  
Coordinates=E21, Trace=q183, [UWGC]  
FT /colour=7  
FT misc\_feature complement(5217782..5217783)  
FT /label=NR09.M5.07  
FT /note=NR09.M5.07, Exact (0), [SBW25 April 05],Plate=PM5.1,  
Coordinates=C3, Trace=C465, [Oxford]  
FT /colour=10  
FT misc\_feature 5217834..5217833  
FT /label=NR09.M5.19  
FT /note=NR09.M5.19, Exact (0), [SBW25 April 05],Plate=PM5.1,  
Coordinates=D3, Trace=C466, [Oxford]  
FT /colour=10  
FT misc\_feature complement(5218060..5218061)  
FT /label=NR09.20  
FT /note=NR09.20, Exact (0), [SBW25 April 05],Plate=P07,  
Coordinates=N04, Trace=NR9\_20, [Oxford]  
FT /colour=7  
FT misc\_feature complement(5234302..5234303)  
FT /label=NR09.55  
FT /note=NR09.55, Estimate (10), [SBW25 April 05],Plate=P07,  
Coordinates=A07, Trace=q125, [UWGC]  
FT /colour=7  
FT misc\_feature 5245029..5245028  
FT /label=NR12.96  
FT /note=NR12.96, Exact (0), [SBW25 April 05],Plate=P01,  
Coordinates=O24, Trace=q296, [UWGC]  
FT /colour=7  
FT misc\_feature complement(5268336..5268337)  
FT /label=NR12.30  
FT /note=NR12.30, Estimate (132), [SBW25 April 05],Plate=P01,  
Coordinates=E12, Trace=q243, [UWGC]  
FT /colour=7  
FT misc\_feature complement(5274413..5274414)  
FT /label=NR54.108  
FT /note=NR54.108, Exact (0), [SBW25 April 05],Plate=P07,  
Coordinates=I23, Trace=q193, [UWGC]  
FT /colour=7  
FT misc\_feature complement(5292878..5292879)  
FT /label=NR08.05  
FT /note=NR08.05, Estimate (46), [SBW25 April 05],Plate=P07,  
Coordinates=M02, Trace=q207, [UWGC]

FT /colour=7  
 FT misc\_feature complement(5329968..5329969)  
 FT /label=NR09.49  
 FT /note=NR09.49, Exact (manual correction), [SBW25 April  
 05],Plate=P07, Coordinates=K06, Trace=q222, [UWGC]  
 FT /colour=7  
 FT misc\_feature complement(5329971..5329972)  
 FT /label=NR09.48  
 FT /note=NR09.48, Estimate (67), [SBW25 April 05],Plate=P07,  
 Coordinates=J06, Trace=q421, [UWGC]  
 FT /colour=7  
 FT misc\_feature 5333620..5333621  
 FT /label=NR54.P10  
 FT /note=NR54.P10, Exact (manual correction), [SBW25 April  
 05],Plate=P06, Coordinates=C19, Trace=q174, [UWGC]  
 FT /colour=7  
 FT misc\_feature complement(5333622..5333623)  
 FT /label=NR54.07  
 FT /note=NR54.07, Exact (0), [SBW25 April 05],Plate=P05,  
 Coordinates=A13, Trace=NR54\_07, [Oxford]  
 FT /colour=7  
 FT misc\_feature complement(5333622..5333623)  
 FT /label=NR54.51  
 FT /note=NR54.51, Exact (0), [SBW25 April 05],Plate=P05,  
 Coordinates=I5, Trace=q121, [UWGC]  
 FT /colour=7  
 FT misc\_feature complement(5333622..5333623)  
 FT /label=NR54.90  
 FT /note=NR54.90, Estimate (1), [SBW25 April 05],Plate=P05,  
 Coordinates=O11, Trace=q148, [UWGC]  
 FT /colour=7  
 FT misc\_feature complement(5333622..5333623)  
 FT /label=NR54.P08  
 FT /note=NR54.P08, Exact (0), [SBW25 April 05],Plate=P06,  
 Coordinates=C15, Trace=q158, [UWGC]  
 FT /colour=7  
 FT misc\_feature complement(5333622..5333623)  
 FT /label=NR54.P11  
 FT /note=NR54.P11, Estimate (1), [SBW25 April 05],Plate=P06,  
 Coordinates=C21, Trace=q182, [UWGC]  
 FT /colour=7  
 FT misc\_feature complement(5333629..5333630)  
 FT /label=NR54.84  
 FT /note=NR54.84, Exact (0), [SBW25 April 05],Plate=P05,  
 Coordinates=M23, Trace=q195, [UWGC]  
 FT /colour=7  
 FT misc\_feature complement(5333629..5333630)  
 FT /label=NR54.95  
 FT /note=NR54.95, Exact (0), [SBW25 April 05],Plate=P05,  
 Coordinates=O21, Trace=q188, [UWGC]  
 FT /colour=7  
 FT misc\_feature 5333687..5333686  
 FT /label=NR54.57  
 FT /note=NR54.57, Exact (0), [SBW25 April 05],Plate=P05,  
 Coordinates=I17, Trace=q169, [UWGC]  
 FT /colour=7  
 FT misc\_feature 5333697..5333696

FT /label=NR54.33  
 FT /note=NR54.33, Exact (0), [SBW25 April 05],Plate=P05,  
 Coordinates=E17, Trace=q167, [UWGC]  
 FT /colour=7  
 FT misc\_feature 5333697..5333696  
 FT /label=NR54.78  
 FT /note=NR54.78, Exact (0), [SBW25 April 05],Plate=P05,  
 Coordinates=M11, Trace=q147, [UWGC]  
 FT /colour=7  
 FT misc\_feature complement(5333697..5333698)  
 FT /label=NR54.66  
 FT /note=NR54.66, Estimate (18), [SBW25 April 05],Plate=P05,  
 Coordinates=K11, Trace=q146, [UWGC]  
 FT /colour=7  
 FT misc\_feature 5333702..5333701  
 FT /label=NR54.96  
 FT /note=NR54.96, Estimate (12), [SBW25 April 05],Plate=P05,  
 Coordinates=O23, Trace=q196, [UWGC]  
 FT /colour=7  
 FT misc\_feature 5333707..5333706  
 FT /label=NR54.36  
 FT /note=NR54.36, Exact (0), [SBW25 April 05],Plate=P05,  
 Coordinates=E23, Trace=q191, [UWGC]  
 FT /colour=7  
 FT misc\_feature 5333707..5333706  
 FT /label=NR54.75  
 FT /note=NR54.75, Exact (0), [SBW25 April 05],Plate=P05,  
 Coordinates=M5, Trace=q123, [UWGC]  
 FT /colour=7  
 FT misc\_feature 5333707..5333706  
 FT /label=NR54.79  
 FT /note=NR54.79, Exact (0), [SBW25 April 05],Plate=P05,  
 Coordinates=M13, Trace=q155, [UWGC]  
 FT /colour=7  
 FT misc\_feature 5333707..5333706  
 FT /label=NR54.82  
 FT /note=NR54.82, Exact (0), [SBW25 April 05],Plate=P05,  
 Coordinates=M19, Trace=q179, [UWGC]  
 FT /colour=7  
 FT misc\_feature 5333707..5333706  
 FT /label=NR54.85  
 FT /note=NR54.85, Exact (0), [SBW25 April 05],Plate=P05,  
 Coordinates=O1, Trace=q108, [UWGC]  
 FT /colour=7  
 FT misc\_feature 5333707..5333706  
 FT /label=NR54.87  
 FT /note=NR54.87, Exact (0), [SBW25 April 05],Plate=P05,  
 Coordinates=O5, Trace=q124, [UWGC]  
 FT /colour=7  
 FT misc\_feature complement(5333708..5333709)  
 FT /label=NR54.13  
 FT /note=NR54.13, Exact (0), [SBW25 April 05],Plate=P05,  
 Coordinates=C1, Trace=q102, [UWGC]  
 FT /colour=7  
 FT misc\_feature complement(5333708..5333709)  
 FT /label=NR54.30

FT /note=NR54.30, Estimate (2), [SBW25 April 05],Plate=P05,  
Coordinates=E11, Trace=q143, [UWGC]  
FT /colour=7  
FT misc\_feature complement(5333709..5333710)  
FT /label=NR54.09  
FT /note=NR54.09, Estimate (1), [SBW25 April 05],Plate=P05,  
Coordinates=A17, Trace=q165, [UWGC]  
FT /colour=7  
FT misc\_feature complement(5333710..5333711)  
FT /label=NR54.05  
FT /note=NR54.05, Exact (0), [SBW25 April 05],Plate=P05,  
Coordinates=A9, Trace=NR54\_05, [Oxford]  
FT /colour=7  
FT misc\_feature 5333712..5333711  
FT /label=NR54.80  
FT /note=NR54.80, Exact (0), [SBW25 April 05],Plate=P05,  
Coordinates=M15, Trace=q163, [UWGC]  
FT /colour=7  
FT misc\_feature complement(5333717..5333718)  
FT /label=NR54.17  
FT /note=NR54.17, Estimate (0), [SBW25 April 05],Plate=P05,  
Coordinates=C9, Trace=q134, [UWGC]  
FT /colour=7  
FT misc\_feature complement(5333718..5333719)  
FT /label=NR54.58  
FT /note=NR54.58, Estimate (1), [SBW25 April 05],Plate=P05,  
Coordinates=I19, Trace=q177, [UWGC]  
FT /colour=7  
FT misc\_feature complement(5333723..5333724)  
FT /label=NR54.08  
FT /note=NR54.08, Exact (0), [SBW25 April 05],Plate=P05,  
Coordinates=A15, Trace=NR54\_08, [Oxford]  
FT /colour=7  
FT misc\_feature complement(5333723..5333724)  
FT /label=NR54.27  
FT /note=NR54.27, Estimate (3), [SBW25 April 05],Plate=P05,  
Coordinates=E5, Trace=q119, [UWGC]  
FT /colour=7  
FT misc\_feature 5333732..5333731  
FT /label=NR54.62  
FT /note=NR54.62, Exact (0), [SBW25 April 05],Plate=P05,  
Coordinates=K3, Trace=q114, [UWGC]  
FT /colour=7  
FT misc\_feature complement(5333743..5333744)  
FT /label=NR54.94  
FT /note=NR54.94, Estimate (24), [SBW25 April 05],Plate=P05,  
Coordinates=O19, Trace=q180, [UWGC]  
FT /colour=7  
FT misc\_feature 5333744..5333743  
FT /label=NR54.72  
FT /note=NR54.72, Exact (0), [SBW25 April 05],Plate=P05,  
Coordinates=K23, Trace=q194, [UWGC]  
FT /colour=7  
FT misc\_feature 5333745..5333744  
FT /label=NR54.101  
FT /note=NR54.101, Estimate (9), [SBW25 April 05],Plate=P07,  
Coordinates=B23, Trace=q389, [UWGC]

FT /colour=7  
 FT misc\_feature complement(5333747..5333748)  
 FT /label=NR54.41  
 FT /note=NR54.41, Estimate (28), [SBW25 April 05],Plate=P05,  
 Coordinates=G9, Trace=q136, [UWGC]  
 FT /colour=7  
 FT misc\_feature 5333748..5333747  
 FT /label=NR54.65  
 FT /note=NR54.65, Estimate (27), UWGC re-mapped on dapB  
 deleted genome, [SBW25 April 05],Plate=P05, Coordinates=K9, Trace=q138, [UWGC]  
 FT /colour=7  
 FT misc\_feature complement(5333758..5333759)  
 FT /label=NR54.112  
 FT /note=NR54.112, Estimate (43), [SBW25 April 05],Plate=P07,  
 Coordinates=M23, Trace=q195, [UWGC]  
 FT /colour=7  
 FT misc\_feature 5333759..5333758  
 FT /label=NR54.31  
 FT /note=NR54.31, Exact (0), [SBW25 April 05],Plate=P05,  
 Coordinates=E13, Trace=q151, [UWGC]  
 FT /colour=7  
 FT misc\_feature 5333759..5333758  
 FT /label=NR54.M5.06  
 FT /note=NR54.M5.06, Exact (0), [SBW25 April 05],Plate=PM5.2,  
 Coordinates=E8, Trace=C604, [Oxford]  
 FT /colour=10  
 FT misc\_feature 5333759..5333758  
 FT /label=NR54.M5.19  
 FT /note=NR54.M5.19, Exact (0), [SBW25 April 05],Plate=PM5.2,  
 Coordinates=F9, Trace=C613, [Oxford]  
 FT /colour=10  
 FT misc\_feature 5333760..5333759  
 FT /label=NR54.21  
 FT /note=NR54.21, Estimate (3), [SBW25 April 05],Plate=P05,  
 Coordinates=C17, Trace=q166, [UWGC]  
 FT /colour=7  
 FT misc\_feature 5333769..5333768  
 FT /label=NR54.15  
 FT /note=NR54.15, Exact (0), [SBW25 April 05],Plate=P05,  
 Coordinates=C5, Trace=q118, [UWGC]  
 FT /colour=7  
 FT misc\_feature 5333769..5333768  
 FT /label=NR54.P05  
 FT /note=NR54.P05, Exact (0), [SBW25 April 05],Plate=P06,  
 Coordinates=A21, Trace=q181, [UWGC]  
 FT /colour=7  
 FT misc\_feature complement(5333770..5333771)  
 FT /label=NR54.23  
 FT /note=NR54.23, Exact (0), [SBW25 April 05],Plate=P05,  
 Coordinates=C21, Trace=q182, [UWGC]  
 FT /colour=7  
 FT misc\_feature complement(5333770..5333771)  
 FT /label=NR54.47  
 FT /note=NR54.47, Exact (0), [SBW25 April 05],Plate=P05,  
 Coordinates=G21, Trace=q184, [UWGC]  
 FT /colour=7  
 FT misc\_feature 5333775..5333774

FT /label=NR54.32  
FT /note=NR54.32, Exact (0), [SBW25 April 05],Plate=P05,  
Coordinates=E15, Trace=q159, [UWGC]  
FT /colour=7  
FT misc\_feature complement(5333775..5333776)  
FT /label=NR54.06  
FT /note=NR54.06, Estimate (7), [SBW25 April 05],Plate=P05,  
Coordinates=A11, Trace=NR54\_06, [Oxford]  
FT /colour=7  
FT misc\_feature 5333776..5333775  
FT /label=NR54.121  
FT /note=NR54.121, Exact (0), [SBW25 April 05],Plate=P07,  
Coordinates=F24, Trace=q491, [UWGC]  
FT /colour=7  
FT misc\_feature complement(5333776..5333777)  
FT /label=NR54.12  
FT /note=NR54.12, Exact (0), [SBW25 April 05],Plate=P05,  
Coordinates=A23, Trace=NR54\_12, [Oxford]  
FT /colour=7  
FT misc\_feature 5333777..5333776  
FT /label=NR54.01  
FT /note=NR54.01, Exact (0), [SBW25 April 05],Plate=P05,  
Coordinates=A1, Trace=q101, [UWGC]  
FT /colour=7  
FT misc\_feature 5333777..5333776  
FT /label=NR54.28  
FT /note=NR54.28, Exact (0), [SBW25 April 05],Plate=P05,  
Coordinates=E7, Trace=q127, [UWGC]  
FT /colour=7  
FT misc\_feature 5333777..5333776  
FT /label=NR54.42  
FT /note=NR54.42, Exact (0), [SBW25 April 05],Plate=P05,  
Coordinates=G11, Trace=q144, [UWGC]  
FT /colour=7  
FT misc\_feature 5333777..5333776  
FT /label=NR54.89  
FT /note=NR54.89, Exact (0), [SBW25 April 05],Plate=P05,  
Coordinates=O9, Trace=q140, [UWGC]  
FT /colour=7  
FT misc\_feature 5333777..5333776  
FT /label=NR54.M5.01  
FT /note=NR54.M5.01, Exact (0), [SBW25 April 05],Plate=PM5.2,  
Coordinates=E3, Trace=C564, [Oxford]  
FT /colour=10  
FT misc\_feature 5333777..5333776  
FT /label=NR54.M5.12  
FT /note=NR54.M5.12, Exact (0), [SBW25 April 05],Plate=PM5.2,  
Coordinates=F2, Trace=C557, [Oxford]  
FT /colour=10  
FT misc\_feature complement(5333786..5333787)  
FT /label=NR54.34  
FT /note=NR54.34, Exact (0), [SBW25 April 05],Plate=P05,  
Coordinates=E19, Trace=q175, [UWGC]  
FT /colour=7  
FT misc\_feature complement(5333788..5333789)  
FT /label=NR54.53

FT /note=NR54.53, Exact (0), [SBW25 April 05],Plate=P05,  
 Coordinates=I9, Trace=q137, [UWGC]  
 FT /colour=7  
 FT misc\_feature complement(5333788..5333789)  
 FT /label=NR54.92  
 FT /note=NR54.92, Exact (0), [SBW25 April 05],Plate=P05,  
 Coordinates=O15, Trace=q164, [UWGC]  
 FT /colour=7  
 FT misc\_feature complement(5333847..5333848)  
 FT /label=NR54.64  
 FT /note=NR54.64, Exact (0), [SBW25 April 05],Plate=P05,  
 Coordinates=K7, Trace=q130, [UWGC]  
 FT /colour=7  
 FT misc\_feature complement(5333857..5333858)  
 FT /label=NR54.106  
 FT /note=NR54.106, Estimate (37), [SBW25 April 05],Plate=P07,  
 Coordinates=G23, Trace=q192, [UWGC]  
 FT /colour=7  
 FT misc\_feature complement(5333857..5333858)  
 FT /label=NR54.25  
 FT /note=NR54.25, Estimate (1), [SBW25 April 05],Plate=P05,  
 Coordinates=E1, Trace=q103, [UWGC]  
 FT /colour=7  
 FT misc\_feature complement(5333857..5333858)  
 FT /label=NR54.39  
 FT /note=NR54.39, Exact (manual correction), [SBW25 April  
 05],Plate=P05, Coordinates=G5, Trace=q120, [UWGC]  
 FT /colour=7  
 FT misc\_feature complement(5333857..5333858)  
 FT /label=NR54.45  
 FT /note=NR54.45, Estimate (24), [SBW25 April 05],Plate=P05,  
 Coordinates=G17, Trace=q168, [UWGC]  
 FT /colour=7  
 FT misc\_feature complement(5333857..5333858)  
 FT /label=NR54.48  
 FT /note=NR54.48, Exact (0), [SBW25 April 05],Plate=P05,  
 Coordinates=G23, Trace=q192, [UWGC]  
 FT /colour=7  
 FT misc\_feature complement(5333857..5333858)  
 FT /label=NR54.50  
 FT /note=NR54.50, Exact (manual correction), [SBW25 April  
 05],Plate=P05, Coordinates=I3, Trace=q113, [UWGC]  
 FT /colour=7  
 FT misc\_feature complement(5333857..5333858)  
 FT /label=NR54.67  
 FT /note=NR54.67, Estimate (5), [SBW25 April 05],Plate=P05,  
 Coordinates=K13, Trace=q154, [UWGC]  
 FT /colour=7  
 FT misc\_feature complement(5333857..5333858)  
 FT /label=NR54.69  
 FT /note=NR54.69, Exact (0), [SBW25 April 05],Plate=P05,  
 Coordinates=K17, Trace=q170, [UWGC]  
 FT /colour=7  
 FT misc\_feature complement(5333862..5333863)  
 FT /label=NR54.44  
 FT /note=NR54.44, Exact (0), [SBW25 April 05],Plate=P05,  
 Coordinates=G15, Trace=q160, [UWGC]



FT /colour=7  
 FT misc\_feature 5333893..5333892  
 FT /label=NR54.68  
 FT /note=NR54.68, Exact (0), UWGC re-mapped on dapB deleted genome, [SBW25 April 05],Plate=P05, Coordinates=K15, Trace=q162, [UWGC]  
 FT /colour=7  
 FT misc\_feature 5333898..5333897  
 FT /label=NR54.24  
 FT /note=NR54.24, Exact (0), UWGC re-mapped on dapB deleted genome, [SBW25 April 05],Plate=P05, Coordinates=C23, Trace=q190, [UWGC]  
 FT /colour=7  
 FT misc\_feature 5333898..5333897  
 FT /label=NR54.83  
 FT /note=NR54.83, Exact (0), UWGC re-mapped on dapB deleted genome, [SBW25 April 05],Plate=P05, Coordinates=M21, Trace=q187, [UWGC]  
 FT /colour=7  
 FT misc\_feature 5333961..5333960  
 FT /label=NR54.91  
 FT /note=NR54.91,MCS hit =  
 ^GATCTGCAGGTCGAGCGCTTAATTAAGTTCGAGTTGGGTATG, [SBW25 April 05],Plate=P05, Coordinates=O13, Trace=q156, [UWGC]  
 FT /colour=7  
 FT misc\_feature 5333961..5333960  
 FT /label=NR54.M5.21  
 FT /note=NR54.M5.21,MCS hit  
 =GATCTGCAGGTCGAGCGCTTAATT^AACTAGTCGAGTTGGGTATG, [SBW25 April 05],Plate=PM5.2, Coordinates=F11, Trace=C629, [Oxford]  
 FT /colour=10  
 FT misc\_feature 5337508..5337507  
 FT /label=NR04.P01  
 FT /note=NR04.P01, Exact (manual correction), [SBW25 April 05],Plate=P06, Coordinates=E1, Trace=q103, [UWGC]  
 FT /colour=7  
 FT misc\_feature 5387482..5387481  
 FT /label=NR54.119  
 FT /note=NR54.119, Exact (manual correction), [SBW25 April 05],Plate=P07, Coordinates=D24, Trace=q490, [UWGC]  
 FT /colour=7  
 FT misc\_feature complement(5417399..5417400)  
 FT /label=NR32.39  
 FT /note=NR32.39, Estimate (361), UWGC re-mapped on dapB deleted genome, [SBW25 April 05],Plate=P02, Coordinates=G6, Trace=q220, [UWGC]  
 FT /colour=7  
 FT misc\_feature complement(5467455..5467456)  
 FT /label=NR12.78  
 FT /note=NR12.78, Exact (0), [SBW25 April 05],Plate=P01, Coordinates=M12, Trace=q247, [UWGC]  
 FT /colour=7  
 FT misc\_feature 5474754..5474753  
 FT /label=NR32.36  
 FT /note=NR32.36, Estimate (43), [SBW25 April 05],Plate=P02, Coordinates=E24, Trace=q291, [UWGC]  
 FT /colour=7  
 FT misc\_feature 5486722..5486721  
 FT /label=NR54.P04  
 FT /note=NR54.P04, Exact (manual correction), [SBW25 April 05],Plate=P06, Coordinates=A19, Trace=q173, [UWGC]

FT /colour=7  
 FT misc\_feature 5491717..5491716  
 FT /label=NR32.34  
 FT /note=NR32.34, Estimate (20), [SBW25 April 05],Plate=P02,  
 Coordinates=E20, Trace=q275, [UWGC]  
 FT /colour=7  
 FT misc\_feature complement(5516397..5516398)  
 FT /label=NR09.51  
 FT /note=NR09.51, Exact (0), [SBW25 April 05],Plate=P07,  
 Coordinates=M06, Trace=q223, [UWGC]  
 FT /colour=7  
 FT misc\_feature 5597171..5597170  
 FT /label=NR49.99  
 FT /note=NR49.99, Estimate (1134), [SBW25 April  
 05],Plate=P07, Coordinates=H17, Trace=q368, [UWGC]  
 FT /colour=7  
 FT misc\_feature complement(5619372..5619373)  
 FT /label=NR09.19  
 FT /note=NR09.19, Estimate (90), [SBW25 April 05],Plate=P07,  
 Coordinates=M04, Trace=q215, [UWGC]  
 FT /colour=7  
 FT misc\_feature 5681430..5681429  
 FT /label=NR12.53  
 FT /note=NR12.53, Estimate (25), [SBW25 April 05],Plate=P01,  
 Coordinates=I10, Trace=q237, [UWGC]  
 FT /colour=7  
 FT misc\_feature 5707177..5707176  
 FT /label=NR09.P06  
 FT /note=NR09.P06, Exact (0), [SBW25 April 05],Plate=P06,  
 Coordinates=I11, Trace=NR9\_P06, [Oxford]  
 FT /colour=7  
 FT misc\_feature 5707511..5707510  
 FT /label=NR09.40  
 FT /note=NR09.40, Exact (manual correction), [SBW25 April  
 05],Plate=P07, Coordinates=B06, Trace=q417, [UWGC]  
 FT /colour=7  
 FT misc\_feature 5707540..5707539  
 FT /label=NR09.78  
 FT /note=NR09.78, Exact (0), [SBW25 April 05],Plate=P07,  
 Coordinates=H08, Trace=NR9\_78, [Oxford]  
 FT /colour=7  
 FT misc\_feature 5722304..5722303  
 FT /label=NR09.83  
 FT /note=NR09.83, Estimate (88), [SBW25 April 05],Plate=P07,  
 Coordinates=M08, Trace=q231, [UWGC]  
 FT /colour=7  
 FT misc\_feature complement(5724856..5724857)  
 FT /label=NR32.40  
 FT /note=NR32.40, Estimate (127), UWGC re-mapped on dapB  
 deleted genome, [SBW25 April 05],Plate=P02, Coordinates=G8, Trace=q228, [UWGC]  
 FT /colour=7  
 FT misc\_feature complement(5839804..5839805)  
 FT /label=NR09.61  
 FT /note=NR09.61, Estimate (35), [SBW25 April 05],Plate=P07,  
 Coordinates=G07, Trace=q128, [UWGC]  
 FT /colour=7  
 FT misc\_feature complement(5847821..5847822)

FT /label=NR54.M5.17  
 FT /note=NR54.M5.17, Exact (0), [SBW25 April 05],Plate=PM5.2,  
 Coordinates=F7, Trace=C597, [Oxford]  
 FT /colour=10  
 FT misc\_feature 5876370..5876369  
 FT /label=NR12.81  
 FT /note=NR12.81, Exact (0), [SBW25 April 05],Plate=P01,  
 Coordinates=M18, Trace=q271, [UWGC]  
 FT /colour=7  
 FT misc\_feature complement(5955692..5955693)  
 FT /label=NR31.75  
 FT /note=NR31.75, Estimate (791), UWGC re-mapped on dapB  
 deleted genome, [SBW25 April 05],Plate=P02, Coordinates=M5, Trace=q123, [UWGC]  
 FT /colour=7  
 FT misc\_feature 6031501..6031500  
 FT /label=NR09.89  
 FT /note=NR09.89, Estimate (60), [SBW25 April 05],Plate=P07,  
 Coordinates=C09, Trace=q134, [UWGC]  
 FT /colour=7  
 FT misc\_feature 6031851..6031850  
 FT /label=NR09.80  
 FT /note=NR09.80, Estimate (4), [SBW25 April 05],Plate=P07,  
 Coordinates=J08, Trace=q429, [UWGC]  
 FT /colour=7  
 FT misc\_feature complement(6069548..6069549)  
 FT /label=NR12.P11  
 FT /note=NR12.P11, Exact (0), [SBW25 April 05],Plate=P06,  
 Coordinates=O9, Trace=q140, [UWGC]  
 FT /colour=7  
 FT misc\_feature complement(6077723..6077724)  
 FT /label=NR09.44  
 FT /note=NR09.44, Estimate (46), [SBW25 April 05],Plate=P07,  
 Coordinates=F06, Trace=q419, [UWGC]  
 FT /colour=7  
 FT misc\_feature 6135400..6135399  
 FT /label=NR39.44  
 FT /note=NR39.44, Exact (0), [SBW25 April 05],Plate=P07,  
 Coordinates=E14, Trace=q251, [UWGC]  
 FT /colour=7  
 FT misc\_feature complement(6211997..6211998)  
 FT /label=NR08.M5.06  
 FT /note=NR08.M5.06,MCS hit  
 =GATCTGCAGGTCGAGCGCTTAATTAAGTTC^GAGTTGGGTATG, [SBW25 April 05],Plate=PM5.1,  
 Coordinates=B8, Trace=C540, [Oxford]  
 FT /colour=10  
 FT misc\_feature 6212033..6212032  
 FT /label=NR08.12  
 FT /note=NR08.12, Exact (0), [SBW25 April 05],Plate=P07,  
 Coordinates=D03, Trace=q310, [UWGC]  
 FT /colour=7  
 FT misc\_feature complement(6212043..6212044)  
 FT /label=NR08.M5.05  
 FT /note=NR08.M5.05, Exact (0), [SBW25 April 05],Plate=PM5.1,  
 Coordinates=B7, Trace=C496, [Oxford]  
 FT /colour=10  
 FT misc\_feature complement(6212044..6212045)  
 FT /label=NR08.M5.03

FT /note=NR08.M5.03, Exact (0), [SBW25 April 05],Plate=PM5.1,  
 Coordinates=B5, Trace=C480, [Oxford]  
 FT /colour=10  
 FT misc\_feature 6212050..6212051  
 FT /label=NR08.13  
 FT /note=NR08.13, Exact (manual correction), [SBW25 April  
 05],Plate=P07, Coordinates=E03, Trace=q111, [UWGC]  
 FT /colour=7  
 FT misc\_feature 6212050..6212049  
 FT /label=NR08.02  
 FT /note=NR08.02, Estimate (0), [SBW25 April 05],Plate=P07,  
 Coordinates=J02, Trace=q405, [UWGC]  
 FT /colour=7  
 FT misc\_feature 6212050..6212049  
 FT /label=NR08.14  
 FT /note=NR08.14, Estimate (0), [SBW25 April 05],Plate=P07,  
 Coordinates=F03, Trace=q311, [UWGC]  
 FT /colour=7  
 FT misc\_feature complement(6212054..6212055)  
 FT /label=NR08.10  
 FT /note=NR08.10, Exact (0), [SBW25 April 05],Plate=P07,  
 Coordinates=B03, Trace=q309, [UWGC]  
 FT /colour=7  
 FT misc\_feature complement(6212054..6212055)  
 FT /label=NR08.11  
 FT /note=NR08.11, Exact (0), [SBW25 April 05],Plate=P07,  
 Coordinates=C03, Trace=q110, [UWGC]  
 FT /colour=7  
 FT misc\_feature complement(6212060..6212061)  
 FT /label=NR08.24  
 FT /note=NR08.24, Exact (0), [SBW25 April 05],Plate=P07,  
 Coordinates=P03, Trace=q316, [UWGC]  
 FT /colour=7  
 FT misc\_feature complement(6212060..6212061)  
 FT /label=NR08.M5.02  
 FT /note=NR08.M5.02, Exact (0), [SBW25 April 05],Plate=PM5.1,  
 Coordinates=B4, Trace=C472, [Oxford]  
 FT /colour=10  
 FT misc\_feature complement(6212060..6212061)  
 FT /label=NR08.M5.04  
 FT /note=NR08.M5.04, Exact (0), [SBW25 April 05],Plate=PM5.1,  
 Coordinates=B6, Trace=C488, [Oxford]  
 FT /colour=10  
 FT misc\_feature 6212092..6212091  
 FT /label=NR08.23  
 FT /note=NR08.23, Estimate (39), [SBW25 April 05],Plate=P07,  
 Coordinates=O03, Trace=q116, [UWGC]  
 FT /colour=7  
 FT misc\_feature 6212095..6212094  
 FT /label=NR08.27  
 FT /note=NR08.27, Exact (0), [SBW25 April 05],Plate=P07,  
 Coordinates=C04, Trace=q210, [UWGC]  
 FT /colour=7  
 FT misc\_feature 6212105..6212104  
 FT /label=NR08.20  
 FT /note=NR08.20, Exact (0), [SBW25 April 05],Plate=P07,  
 Coordinates=L03, Trace=q314, [UWGC]

FT /colour=7  
 FT misc\_feature 6212107..6212106  
 FT /label=NR08.04  
 FT /note=NR08.04, Estimate (29), [SBW25 April 05],Plate=P07,  
 Coordinates=L02, Trace=q406, [UWGC]  
 FT /colour=7  
 FT misc\_feature 6212123..6212122  
 FT /label=NR08.08  
 FT /note=NR08.08, Estimate (2), [SBW25 April 05],Plate=P07,  
 Coordinates=P02, Trace=q408, [UWGC]  
 FT /colour=7  
 FT misc\_feature complement(6212127..6212128)  
 FT /label=NR08.19  
 FT /note=NR08.19, Estimate (33), [SBW25 April 05],Plate=P07,  
 Coordinates=K03, Trace=q114, [UWGC]  
 FT /colour=7  
 FT misc\_feature 6212133..6212132  
 FT /label=NR08.M5.01  
 FT /note=NR08.M5.01, Exact (0), [SBW25 April 05],Plate=PM5.1,  
 Coordinates=B3, Trace=C464, [Oxford]  
 FT /colour=10  
 FT misc\_feature complement(6212181..6212182)  
 FT /label=NR08.26  
 FT /note=NR08.26, Exact (0), [SBW25 April 05],Plate=P07,  
 Coordinates=B04, Trace=q409, [UWGC]  
 FT /colour=7  
 FT misc\_feature complement(6212183..6212184)  
 FT /label=NR08.17  
 FT /note=NR08.17, Exact (0), [SBW25 April 05],Plate=P07,  
 Coordinates=I03, Trace=q113, [UWGC]  
 FT /colour=7  
 FT misc\_feature complement(6212183..6212184)  
 FT /label=NR08.18  
 FT /note=NR08.18, Exact (0), [SBW25 April 05],Plate=P07,  
 Coordinates=J03, Trace=q313, [UWGC]  
 FT /colour=7  
 FT misc\_feature complement(6212187..6212188)  
 FT /label=NR08.01  
 FT /note=NR08.01, Estimate (10), [SBW25 April 05],Plate=P07,  
 Coordinates=I02, Trace=q205, [UWGC]  
 FT /colour=7  
 FT misc\_feature complement(6212219..6212220)  
 FT /label=NR08.22  
 FT /note=NR08.22, Estimate (44), [SBW25 April 05],Plate=P07,  
 Coordinates=N03, Trace=q315, [UWGC]  
 FT /colour=7  
 FT misc\_feature 6212289..6212288  
 FT /label=NR08.15  
 FT /note=NR08.15, Estimate (41), [SBW25 April 05],Plate=P07,  
 Coordinates=G03, Trace=q112, [UWGC]  
 FT /colour=7  
 FT misc\_feature complement(6212358..6212359)  
 FT /label=NR08.07  
 FT /note=NR08.07, Exact (0), [SBW25 April 05],Plate=P07,  
 Coordinates=O02, Trace=q208, [UWGC]  
 FT /colour=7  
 FT misc\_feature complement(6212358..6212359)

FT /label=NR08.21  
FT /note=NR08.21, Exact (0), [SBW25 April 05],Plate=P07,  
Coordinates=M03, Trace=q115, [UWGC]  
FT /colour=7  
FT misc\_feature complement(6212436..6212437)  
FT /label=NR08.16  
FT /note=NR08.16, Exact (manual correction), [SBW25 April  
05],Plate=P07, Coordinates=H03, Trace=q312, [UWGC]  
FT /colour=7  
FT misc\_feature complement(6212471..6212472)  
FT /label=NR04.120  
FT /note=NR04.120, Estimate (35), [SBW25 April 05],Plate=P07,  
Coordinates=H02, Trace=q404, [UWGC]  
FT /colour=7  
FT misc\_feature 6217096..6217095  
FT /label=NR31.M5.01  
FT /note=NR31.M5.01, Exact (0), [SBW25 April 05],Plate=PM5.1,  
Coordinates=F7, Trace=C500, [Oxford]  
FT /colour=10  
FT misc\_feature 6222755..6222754  
FT /label=NR08.25  
FT /note=NR08.25, Estimate (33), [SBW25 April 05],Plate=P07,  
Coordinates=A04, Trace=q209, [UWGC]  
FT /colour=7  
FT misc\_feature complement(6227572..6227573)  
FT /label=NR09.54  
FT /note=NR09.54, Estimate (1), [SBW25 April 05],Plate=P07,  
Coordinates=P06, Trace=q424, [UWGC]  
FT /colour=7  
FT misc\_feature complement(6292910..6292911)  
FT /label=NR48.P05  
FT /note=NR48.P05,MCS hit =  
^GATCTGCAGGTCGAGCGCTTAATTAAGTTCGAGTTGGGTATG, [SBW25 April 05],Plate=P05,  
Coordinates=F22, Trace=q483, [UWGC]  
FT /colour=7  
FT misc\_feature complement(6293029..6293030)  
FT /label=NR48.07  
FT /note=NR48.07, Exact (manual correction), [SBW25 April  
05],Plate=P05, Coordinates=N21, Trace=q387, [UWGC]  
FT /colour=7  
FT misc\_feature complement(6293029..6293030)  
FT /label=NR48.12  
FT /note=NR48.12, Exact (0), [SBW25 April 05],Plate=P05,  
Coordinates=P19, Trace=q380, [UWGC]  
FT /colour=7  
FT misc\_feature complement(6293030..6293031)  
FT /label=NR48.P08  
FT /note=NR48.P08, Estimate (4), [SBW25 April 05],Plate=P05,  
Coordinates=H16, Trace=q460, [UWGC]  
FT /colour=7  
FT misc\_feature complement(6293034..6293035)  
FT /label=NR48.P04  
FT /note=NR48.P04, Exact (0), [SBW25 April 05],Plate=P05,  
Coordinates=F20, Trace=q475, [UWGC]  
FT /colour=7  
FT misc\_feature 6293035..6293036  
FT /label=NR48.16

FT /note=NR48.16, Exact (manual correction), [SBW25 April  
 05],Plate=P07, Coordinates=C15, Trace=q158, [UWGC]  
 FT /colour=7  
 FT misc\_feature 6293035..6293036  
 FT /label=NR48.26  
 FT /note=NR48.26, Exact (manual correction), [SBW25 April  
 05],Plate=P07, Coordinates=M15, Trace=q163, [UWGC]  
 FT /colour=7  
 FT misc\_feature complement(6293039..6293040)  
 FT /label=NR48.04  
 FT /note=NR48.04, Exact (0), [SBW25 April 05],Plate=P05,  
 Coordinates=N15, Trace=q363, [UWGC]  
 FT /colour=7  
 FT misc\_feature complement(6293039..6293040)  
 FT /label=NR48.P11  
 FT /note=NR48.P11, Exact (0), [SBW25 April 05],Plate=P05,  
 Coordinates=H22, Trace=q484, [UWGC]  
 FT /colour=7  
 FT misc\_feature complement(6293045..6293046)  
 FT /label=NR48.05  
 FT /note=NR48.05, Exact (0), [SBW25 April 05],Plate=P05,  
 Coordinates=N17, Trace=q371, [UWGC]  
 FT /colour=7  
 FT misc\_feature 6293051..6293050  
 FT /label=NR48.P10  
 FT /note=NR48.P10, Estimate (0), [SBW25 April 05],Plate=P05,  
 Coordinates=H20, Trace=q476, [UWGC]  
 FT /colour=7  
 FT misc\_feature 6293052..6293051  
 FT /label=NR48.P03  
 FT /note=NR48.P03, Exact (0), [SBW25 April 05],Plate=P05,  
 Coordinates=F18, Trace=q467, [UWGC]  
 FT /colour=7  
 FT misc\_feature complement(6293052..6293053)  
 FT /label=NR48.03  
 FT /note=NR48.03, Estimate (23), UWGC re-mapped on dapB  
 deleted genome, [SBW25 April 05],Plate=P05, Coordinates=N13, Trace=q355, [UWGC]  
 FT /colour=7  
 FT misc\_feature 6293053..6293054  
 FT /label=NR48.20  
 FT /note=NR48.20, Exact (manual correction), [SBW25 April  
 05],Plate=P07, Coordinates=G15, Trace=q160, [UWGC]  
 FT /colour=7  
 FT misc\_feature complement(6293068..6293069)  
 FT /label=NR48.50  
 FT /note=NR48.50, Exact (0), [SBW25 April 05],Plate=P07,  
 Coordinates=E17, Trace=q167, [UWGC]  
 FT /colour=7  
 FT misc\_feature 6293076..6293075  
 FT /label=NR48.41  
 FT /note=NR48.41, Estimate (33), [SBW25 April 05],Plate=P07,  
 Coordinates=L16, Trace=q462, [UWGC]  
 FT /colour=7  
 FT misc\_feature complement(6293076..6293077)  
 FT /label=NR48.27  
 FT /note=NR48.27, Estimate (43), [SBW25 April 05],Plate=P07,  
 Coordinates=N15, Trace=q363, [UWGC]

FT /colour=7  
FT misc\_feature complement(6293098..6293099)  
FT /label=NR48.49  
FT /note=NR48.49, Estimate (30), [SBW25 April 05],Plate=P07,  
Coordinates=D17, Trace=q366, [UWGC]  
FT /colour=7  
FT misc\_feature 6293119..6293118  
FT /label=NR48.P01  
FT /note=NR48.P01, Estimate (2), [SBW25 April 05],Plate=P05,  
Coordinates=F14, Trace=q451, [UWGC]  
FT /colour=7  
FT misc\_feature complement(6293125..6293126)  
FT /label=NR48.10  
FT /note=NR48.10, Estimate (14), [SBW25 April 05],Plate=P05,  
Coordinates=P15, Trace=q364, [UWGC]  
FT /colour=7  
FT misc\_feature complement(6293130..6293131)  
FT /label=NR48.32  
FT /note=NR48.32, Estimate (3), [SBW25 April 05],Plate=P07,  
Coordinates=C16, Trace=q258, [UWGC]  
FT /colour=7  
FT misc\_feature complement(6293145..6293146)  
FT /label=NR48.P12  
FT /note=NR48.P12, Estimate (15), [SBW25 April 05],Plate=P05,  
Coordinates=H24, Trace=q492, [UWGC]  
FT /colour=7  
FT misc\_feature 6293149..6293148  
FT /label=NR48.21  
FT /note=NR48.21, Estimate (105), [SBW25 April 05],Plate=P07,  
Coordinates=H15, Trace=q360, [UWGC]  
FT /colour=7  
FT misc\_feature 6293152..6293151  
FT /label=NR48.35  
FT /note=NR48.35, Estimate (193), [SBW25 April 05],Plate=P07,  
Coordinates=F16, Trace=q459, [UWGC]  
FT /colour=7  
FT misc\_feature complement(6293157..6293158)  
FT /label=NR48.40  
FT /note=NR48.40, Estimate (4), [SBW25 April 05],Plate=P07,  
Coordinates=K16, Trace=q262, [UWGC]  
FT /colour=7  
FT misc\_feature 6293184..6293183  
FT /label=NR48.37  
FT /note=NR48.37, Estimate (34), [SBW25 April 05],Plate=P07,  
Coordinates=H16, Trace=q460, [UWGC]  
FT /colour=7  
FT misc\_feature complement(6293214..6293215)  
FT /label=NR48.P06  
FT /note=NR48.P06, Estimate (4), [SBW25 April 05],Plate=P05,  
Coordinates=F24, Trace=q491, [UWGC]  
FT /colour=7  
FT misc\_feature complement(6293218..6293219)  
FT /label=NR48.08  
FT /note=NR48.08, Estimate (18), [SBW25 April 05],Plate=P05,  
Coordinates=N23, Trace=q395, [UWGC]  
FT /colour=7  
FT misc\_feature 6293227..6293226



FT /label=NR48.29  
FT /note=NR48.29, Estimate (107), [SBW25 April 05],Plate=P07,  
Coordinates=P15, Trace=q364, [UWGC]  
FT /colour=7  
FT misc\_feature 6293228..6293227  
FT /label=NR48.19  
FT /note=NR48.19, Estimate (11), [SBW25 April 05],Plate=P07,  
Coordinates=F15, Trace=q359, [UWGC]  
FT /colour=7  
FT misc\_feature 6293228..6293227  
FT /label=NR48.23  
FT /note=NR48.23, Estimate (11), [SBW25 April 05],Plate=P07,  
Coordinates=J15, Trace=q361, [UWGC]  
FT /colour=7  
FT misc\_feature complement(6293230..6293231)  
FT /label=NR48.13  
FT /note=NR48.13, Estimate (82), [SBW25 April 05],Plate=P05,  
Coordinates=P21, Trace=q388, [UWGC]  
FT /colour=7  
FT misc\_feature complement(6293238..6293239)  
FT /label=NR48.36  
FT /note=NR48.36, Estimate (10), [SBW25 April 05],Plate=P07,  
Coordinates=G16, Trace=q260, [UWGC]  
FT /colour=7  
FT misc\_feature 6293257..6293256  
FT /label=NR48.22  
FT /note=NR48.22, Estimate (25), [SBW25 April 05],Plate=P07,  
Coordinates=I15, Trace=q161, [UWGC]  
FT /colour=7  
FT misc\_feature complement(6293270..6293271)  
FT /label=NR48.34  
FT /note=NR48.34, Estimate (32), [SBW25 April 05],Plate=P07,  
Coordinates=E16, Trace=q259, [UWGC]  
FT /colour=7  
FT misc\_feature 6293278..6293277  
FT /label=NR48.48  
FT /note=NR48.48, Estimate (77), [SBW25 April 05],Plate=P07,  
Coordinates=C17, Trace=q166, [UWGC]  
FT /colour=7  
FT misc\_feature 6293279..6293278  
FT /label=NR48.39  
FT /note=NR48.39, Estimate (16), [SBW25 April 05],Plate=P07,  
Coordinates=J16, Trace=q461, [UWGC]  
FT /colour=7  
FT misc\_feature complement(6293284..6293285)  
FT /label=NR48.15  
FT /note=NR48.15, Estimate (2), [SBW25 April 05],Plate=P07,  
Coordinates=B15, Trace=q357, [UWGC]  
FT /colour=7  
FT misc\_feature 6293286..6293285  
FT /label=NR48.43  
FT /note=NR48.43, Estimate (134), [SBW25 April 05],Plate=P07,  
Coordinates=N16, Trace=q463, [UWGC]  
FT /colour=7  
FT misc\_feature complement(6293300..6293301)  
FT /label=NR48.28

FT /note=NR48.28, Estimate (1), [SBW25 April 05],Plate=P07,  
Coordinates=O15, Trace=q164, [UWGC]  
FT /colour=7  
FT misc\_feature complement(6293314..6293315)  
FT /label=NR48.17  
FT /note=NR48.17, Estimate (34), [SBW25 April 05],Plate=P07,  
Coordinates=D15, Trace=q358, [UWGC]  
FT /colour=7  
FT misc\_feature 6293322..6293321  
FT /label=NR48.33  
FT /note=NR48.33, Estimate (3), [SBW25 April 05],Plate=P07,  
Coordinates=D16, Trace=q458, [UWGC]  
FT /colour=7  
FT misc\_feature 6293325..6293324  
FT /label=NR48.31  
FT /note=NR48.31, Estimate (40), [SBW25 April 05],Plate=P07,  
Coordinates=B16, Trace=q457, [UWGC]  
FT /colour=7  
FT misc\_feature 6293379..6293378  
FT /label=NR48.01  
FT /note=NR48.01, Exact (manual correction), [SBW25 April  
05],Plate=P05, Coordinates=L21, Trace=NR48\_01, [Oxford]  
FT /colour=7  
FT misc\_feature 6293461..6293460  
FT /label=NR48.30  
FT /note=NR48.30, Exact (0), [SBW25 April 05],Plate=P07,  
Coordinates=A16, Trace=q257, [UWGC]  
FT /colour=7  
FT misc\_feature complement(6293487..6293488)  
FT /label=NR48.38  
FT /note=NR48.38, Estimate (1), [SBW25 April 05],Plate=P07,  
Coordinates=I16, Trace=q261, [UWGC]  
FT /colour=7  
FT misc\_feature 6293587..6293586  
FT /label=NR48.47  
FT /note=NR48.47, Estimate (10), [SBW25 April 05],Plate=P07,  
Coordinates=B17, Trace=q365, [UWGC]  
FT /colour=7  
FT misc\_feature complement(6293747..6293748)  
FT /label=NR48.P07  
FT /note=NR48.P07, Exact (manual correction), [SBW25 April  
05],Plate=P05, Coordinates=H14, Trace=q452, [UWGC]  
FT /colour=7  
FT misc\_feature 6293753..6293752  
FT /label=NR48.42  
FT /note=NR48.42, Estimate (29), [SBW25 April 05],Plate=P07,  
Coordinates=M16, Trace=q263, [UWGC]  
FT /colour=7  
FT misc\_feature 6293753..6293752  
FT /label=NR48.44  
FT /note=NR48.44, Estimate (23), [SBW25 April 05],Plate=P07,  
Coordinates=O16, Trace=q264, [UWGC]  
FT /colour=7  
FT misc\_feature 6293754..6293753  
FT /label=NR48.09  
FT /note=NR48.09, Exact (0), [SBW25 April 05],Plate=P05,  
Coordinates=P13, Trace=q356, [UWGC]

FT /colour=7  
 FT misc\_feature 6293754..6293753  
 FT /label=NR48.P02  
 FT /note=NR48.P02, Exact (0), [SBW25 April 05],Plate=P05,  
 Coordinates=F16, Trace=q459, [UWGC]  
 FT /colour=7  
  
 FT misc\_feature 6293755..6293756  
 FT /label=NR48.18  
 FT /note=NR48.18, Exact (manual correction), [SBW25 April  
 05],Plate=P07, Coordinates=E15, Trace=q159, [UWGC]  
 FT /colour=7  
 FT misc\_feature complement(6315451..6315452)  
 FT /label=NR12.M5.10  
 FT /note=NR12.M5.10, Exact (0), [SBW25 April 05],Plate=PM5.1,  
 Coordinates=E1, Trace=C440, [Oxford]  
 FT /colour=10  
 FT misc\_feature 6349047..6349048  
 FT /label=NR45.45  
 FT /note=NR45.45,MCS hit =  
 GATCTGCAGGTCGAGCGC^TTAATTAAGTTCGAGTTGGGTATG, [SBW25 April 05],Plate=P05,  
 Coordinates=P5, Trace=q324, [UWGC]  
 FT /colour=7  
 FT misc\_feature complement(6349047..6349048)  
 FT /label=NR45.07  
 FT /note=NR45.07,MCS hit =  
 GATCTGCAGGTCGAGCGCT^TAATTAAGTTCGAGTTGGGTATG, [SBW25 April 05],Plate=P05,  
 Coordinates=D1, Trace=q302, [UWGC]  
 FT /colour=7  
 FT misc\_feature complement(6349047..6349048)  
 FT /label=NR45.12  
 FT /note=NR45.12,MCS hit =  
 ^GATCTGCAGGTCGAGCGCTTAATTAAGTTCGAGTTGGGTATG, [SBW25 April 05],Plate=P05,  
 Coordinates=D11, Trace=q342, [UWGC]  
 FT /colour=7  
 FT misc\_feature complement(6349047..6349048)  
 FT /label=NR45.43  
 FT /note=NR45.43,MCS hit =  
 GATCTGCAGGTCGAGCGCT^TAATTAAGTTCGAGTTGGGTATG, [SBW25 April 05],Plate=P05,  
 Coordinates=P1, Trace=q308, [UWGC]  
 FT /colour=7  
 FT misc\_feature 6349075..6349074  
 FT /label=NR45.27  
 FT /note=NR45.27, Exact (0), [SBW25 April 05],Plate=P05,  
 Coordinates=J5, Trace=q321, [UWGC]  
 FT /colour=7  
 FT misc\_feature complement(6349081..6349082)  
 FT /label=NR45.13  
 FT /note=NR45.13, Exact (0), UWGC re-mapped on dapB deleted  
 genome, [SBW25 April 05],Plate=P05, Coordinates=F1, Trace=q303, [UWGC]  
 FT /colour=7  
 FT misc\_feature 6349084..6349083  
 FT /label=NR45.21  
 FT /note=NR45.21, Estimate (3), [SBW25 April 05],Plate=P05,  
 Coordinates=H5, Trace=q320, [UWGC]  
 FT /colour=7  
 FT misc\_feature 6349084..6349083

FT /label=NR45.40  
 FT /note=NR45.40, Estimate (3), [SBW25 April 05],Plate=P05,  
 Coordinates=N7, Trace=q331, [UWGC]  
 FT /colour=7  
 FT misc\_feature 6349085..6349084  
 FT /label=NR45.02  
 FT /note=NR45.02, Estimate (2), [SBW25 April 05],Plate=P05,  
 Coordinates=B3, Trace=q309, [UWGC]  
 FT /colour=7  
 FT misc\_feature 6349085..6349084  
 FT /label=NR45.04  
 FT /note=NR45.04, Exact (0), [SBW25 April 05],Plate=P05,  
 Coordinates=B7, Trace=q325, [UWGC]  
 FT /colour=7  
 FT misc\_feature 6349085..6349084  
 FT /label=NR45.25  
 FT /note=NR45.25, Exact (0), [SBW25 April 05],Plate=P05,  
 Coordinates=J1, Trace=q305, [UWGC]  
 FT /colour=7  
 FT misc\_feature 6349086..6349085  
 FT /label=NR45.22  
 FT /note=NR45.22, Estimate (0), [SBW25 April 05],Plate=P05,  
 Coordinates=H7, Trace=q328, [UWGC]  
 FT /colour=7  
 FT misc\_feature complement(6349091..6349092)  
 FT /label=NR45.28  
 FT /note=NR45.28, Exact (0), UWGC re-mapped on dapB deleted  
 genome, [SBW25 April 05],Plate=P05, Coordinates=J7, Trace=q329, [UWGC]  
 FT /colour=7  
 FT misc\_feature complement(6349091..6349092)  
 FT /label=NR45.33  
 FT /note=NR45.33, Exact (0), UWGC re-mapped on dapB deleted  
 genome, [SBW25 April 05],Plate=P05, Coordinates=L5, Trace=q322, [UWGC]  
 FT /colour=7  
 FT misc\_feature 6349096..6349095  
 FT /label=NR45.18  
 FT /note=NR45.18, Exact (0), [SBW25 April 05],Plate=P05,  
 Coordinates=F11, Trace=q343, [UWGC]  
 FT /colour=7  
 FT misc\_feature complement(6349096..6349097)  
 FT /label=NR45.03  
 FT /note=NR45.03, Exact (0), UWGC re-mapped on dapB deleted  
 genome, [SBW25 April 05],Plate=P05, Coordinates=B5, Trace=q317, [UWGC]  
 FT /colour=7  
 FT misc\_feature complement(6349096..6349097)  
 FT /label=NR45.10  
 FT /note=NR45.10, Exact (0), UWGC re-mapped on dapB deleted  
 genome, [SBW25 April 05],Plate=P05, Coordinates=D7, Trace=q326, [UWGC]  
 FT /colour=7  
  
 FT misc\_feature complement(6349096..6349097)  
 FT /label=NR45.11  
 FT /note=NR45.11, Exact (0), UWGC re-mapped on dapB deleted  
 genome, [SBW25 April 05],Plate=P05, Coordinates=D9, Trace=q334, [UWGC]  
 FT /colour=7  
 FT misc\_feature complement(6349096..6349097)  
 FT /label=NR45.15

FT /note=NR45.15, Exact (0), UWGC re-mapped on dapB deleted  
genome, [SBW25 April 05],Plate=P05, Coordinates=F5, Trace=q319, [UWGC]  
FT /colour=7  
FT misc\_feature complement(6349096..6349097)  
FT /label=NR45.17  
FT /note=NR45.17, Exact (0), UWGC re-mapped on dapB deleted  
genome, [SBW25 April 05],Plate=P05, Coordinates=F9, Trace=q335, [UWGC]  
FT /colour=7  
FT misc\_feature complement(6349096..6349097)  
FT /label=NR45.20  
FT /note=NR45.20, Exact (0), UWGC re-mapped on dapB deleted  
genome, [SBW25 April 05],Plate=P05, Coordinates=H3, Trace=q312, [UWGC]  
FT /colour=7  
FT misc\_feature complement(6349096..6349097)  
FT /label=NR54.61  
FT /note=NR54.61, Exact (0), UWGC re-mapped on dapB deleted  
genome, [SBW25 April 05],Plate=P05, Coordinates=K1, Trace=q106, [UWGC]  
FT /colour=7  
FT misc\_feature complement(6349097..6349098)  
FT /label=NR45.42  
FT /note=NR45.42, Exact (0), UWGC re-mapped on dapB deleted  
genome, [SBW25 April 05],Plate=P05, Coordinates=N11, Trace=q347, [UWGC]  
FT /colour=7  
FT misc\_feature complement(6349131..6349132)  
FT /label=NR45.29  
FT /note=NR45.29, Exact (0), UWGC re-mapped on dapB deleted  
genome, [SBW25 April 05],Plate=P05, Coordinates=J9, Trace=q337, [UWGC]  
FT /colour=7  
FT misc\_feature 6349145..6349144  
FT /label=NR45.06  
FT /note=NR45.06, Estimate (0), [SBW25 April 05],Plate=P05,  
Coordinates=B11, Trace=q341, [UWGC]  
FT /colour=7  
FT misc\_feature 6349145..6349144  
FT /label=NR45.47  
FT /note=NR45.47, Exact (0), [SBW25 April 05],Plate=P05,  
Coordinates=P9, Trace=q340, [UWGC]  
FT /colour=7  
FT misc\_feature 6349148..6349147  
FT /label=NR45.37  
FT /note=NR45.37, Estimate (0), [SBW25 April 05],Plate=P05,  
Coordinates=N1, Trace=q307, [UWGC]  
FT /colour=7  
FT misc\_feature complement(6349152..6349153)  
FT /label=NR45.01  
FT /note=NR45.01, Estimate (1), UWGC re-mapped on dapB deleted  
genome, [SBW25 April 05],Plate=P05, Coordinates=B1, Trace=q301, [UWGC]  
FT /colour=7  
FT misc\_feature complement(6349156..6349157)  
FT /label=NR45.05  
FT /note=NR45.05, Exact (0), [SBW25 April 05],Plate=P05,  
Coordinates=B9, Trace=q333, [UWGC]  
FT /colour=7  
FT misc\_feature complement(6349156..6349157)  
FT /label=NR45.23  
FT /note=NR45.23, Exact (0), [SBW25 April 05],Plate=P05,  
Coordinates=H9, Trace=q336, [UWGC]

FT /colour=7  
 FT misc\_feature complement(6349156..6349157)  
 FT /label=NR45.24  
 FT /note=NR45.24, Exact (0), [SBW25 April 05],Plate=P05,  
 Coordinates=H11, Trace=q344, [UWGC]  
 FT /colour=7  
 FT misc\_feature complement(6349157..6349158)  
 FT /label=NR45.08  
 FT /note=NR45.08, Exact (0), [SBW25 April 05],Plate=P05,  
 Coordinates=D3, Trace=q310, [UWGC]  
 FT /colour=7  
 FT misc\_feature complement(6349157..6349158)  
 FT /label=NR45.14  
 FT /note=NR45.14, Exact (0), [SBW25 April 05],Plate=P05,  
 Coordinates=F3, Trace=q311, [UWGC]  
 FT /colour=7  
 FT misc\_feature complement(6349157..6349158)  
 FT /label=NR45.39  
 FT /note=NR45.39, Exact (0), [SBW25 April 05],Plate=P05,  
 Coordinates=N5, Trace=q323, [UWGC]  
 FT /colour=7  
 FT misc\_feature complement(6349179..6349180)  
 FT /label=NR45.46  
 FT /note=NR45.46, Exact (0), [SBW25 April 05],Plate=P05,  
 Coordinates=P7, Trace=q332, [UWGC]  
 FT /colour=7  
 FT misc\_feature complement(6349183..6349184)  
 FT /label=NR45.38  
 FT /note=NR45.38, Estimate (27), UWGC re-mapped on dapB  
 deleted genome, [SBW25 April 05],Plate=P05, Coordinates=N3, Trace=q315, [UWGC]  
 FT /colour=7  
 FT misc\_feature 6349185..6349184  
 FT /label=NR45.41  
 FT /note=NR45.41, Exact (0), [SBW25 April 05],Plate=P05,  
 Coordinates=N9, Trace=q339, [UWGC]  
 FT /colour=7  
 FT misc\_feature complement(6349196..6349197)  
 FT /label=NR45.48  
 FT /note=NR45.48, Exact (0), [SBW25 April 05],Plate=P05,  
 Coordinates=P11, Trace=q348, [UWGC]  
 FT /colour=7  
 FT misc\_feature 6349211..6349210  
 FT /label=NR45.09  
 FT /note=NR45.09, Estimate (1), [SBW25 April 05],Plate=P05,  
 Coordinates=D5, Trace=q318, [UWGC]  
 FT /colour=7  
 FT misc\_feature complement(6349223..6349224)  
 FT /label=NR45.16  
 FT /note=NR45.16, Exact (0), [SBW25 April 05],Plate=P05,  
 Coordinates=F7, Trace=q327, [UWGC]  
 FT /colour=7  
 FT misc\_feature complement(6349223..6349224)  
 FT /label=NR45.30  
 FT /note=NR45.30, Exact (0), [SBW25 April 05],Plate=P05,  
 Coordinates=J11, Trace=q345, [UWGC]  
 FT /colour=7  
 FT misc\_feature complement(6349223..6349224)

FT /label=NR45.44  
FT /note=NR45.44, Exact (0), [SBW25 April 05],Plate=P05,  
Coordinates=P3, Trace=q316, [UWGC]  
FT /colour=7  
FT misc\_feature complement(6402249..6402250)  
FT /label=NR20.35  
FT /note=NR20.35, Estimate (34), [SBW25 April 05],Plate=P07,  
Coordinates=G11, Trace=q144, [UWGC]  
FT /colour=7  
FT misc\_feature 6445759..6445758  
FT /label=NR12.M5.14  
FT /note=NR12.M5.14, Exact (0), [SBW25 April 05],Plate=PM5.1,  
Coordinates=E5, Trace=C483, [Oxford]  
FT /colour=10  
FT misc\_feature complement(6458457..6458458)  
FT /label=NR04.102  
FT /note=NR04.102, Exact (0), [SBW25 April 05],Plate=P07,  
Coordinates=F01, Trace=q303, [UWGC]  
FT /colour=7  
FT misc\_feature complement(6600327..6600328)  
FT /label=NR12.42  
FT /note=NR12.42, Exact (0), [SBW25 April 05],Plate=P01,  
Coordinates=G12, Trace=q244, [UWGC]  
FT /colour=7  
FT misc\_feature complement(6653123..6653124)  
FT /label=NR35.08  
FT /note=NR35.08,MCS hit =  
GATCTGCAGGTCGAGCGCT^TAATTAAGTTCGAGTTGGGTATG, [SBW25 April 05],Plate=P03,  
Coordinates=A15, Trace=q157, [UWGC]  
FT /colour=7  
FT misc\_feature complement(6653123..6653124)  
FT /label=NR35.M5.03  
FT /note=NR35.M5.03,MCS hit  
=GATCTGCAGGTCGAGCGCT^TAATTAAGTTCGAGTTGGGTATG, [SBW25 April 05],Plate=PM5.1,  
Coordinates=H3, Trace=C470, [Oxford]  
FT /colour=10  
FT misc\_feature 6653128..6653127  
FT /label=NR35.42  
FT /note=NR35.42, Estimate (35), [SBW25 April 05],Plate=P03,  
Coordinates=G11, Trace=q144, [UWGC]  
FT /colour=7  
FT misc\_feature complement(6653131..6653132)  
FT /label=NR35.82  
FT /note=NR35.82, Exact (manual correction), [SBW25 April  
05],Plate=P03, Coordinates=M19, Trace=q179, [UWGC]  
FT /colour=7  
FT misc\_feature 6653135..6653134  
FT /label=NR35.35  
FT /note=NR35.35, Estimate (132), [SBW25 April 05],Plate=P03,  
Coordinates=E21, Trace=q183, [UWGC]  
FT /colour=7  
FT misc\_feature 6653137..6653136  
FT /label=NR35.75  
FT /note=NR35.75, Estimate (135), [SBW25 April 05],Plate=P03,  
Coordinates=M5, Trace=q123, [UWGC]  
FT /colour=7  
FT misc\_feature complement(6653145..6653146)

FT /label=NR35.26  
FT /note=NR35.26, Exact (manual correction), [SBW25 April 05],Plate=P03, Coordinates=E3, Trace=q111, [UWGC]  
FT /colour=7  
FT misc\_feature 6653152..6653151  
FT /label=NR35.64  
FT /note=NR35.64, Estimate (48), [SBW25 April 05],Plate=P03, Coordinates=K7, Trace=q130, [UWGC]  
FT /colour=7  
FT misc\_feature 6653160..6653159  
FT /label=NR35.22  
FT /note=NR35.22, Estimate (196), [SBW25 April 05],Plate=P03, Coordinates=C19, Trace=q174, [UWGC]  
FT /colour=7  
FT misc\_feature complement(6653168..6653169)  
FT /label=NR35.30  
FT /note=NR35.30, Estimate (27), UWGC re-mapped on dapB deleted genome, [SBW25 April 05],Plate=P03, Coordinates=E11, Trace=q143, [UWGC]  
FT /colour=7  
FT misc\_feature 6653169..6653168  
FT /label=NR35.63  
FT /note=NR35.63, Estimate (36), [SBW25 April 05],Plate=P03, Coordinates=K5, Trace=q122, [UWGC]  
FT /colour=7  
FT misc\_feature 6653173..6653172  
FT /label=NR35.51  
FT /note=NR35.51, Estimate (2), [SBW25 April 05],Plate=P03, Coordinates=I5, Trace=q121, [UWGC]  
FT /colour=7  
FT misc\_feature 6653174..6653173  
FT /label=NR35.16  
FT /note=NR35.16, Estimate (218), [SBW25 April 05],Plate=P03, Coordinates=C7, Trace=q126, [UWGC]  
FT /colour=7  
FT misc\_feature 6653178..6653177  
FT /label=NR35.91  
FT /note=NR35.91, Estimate (14), [SBW25 April 05],Plate=P03, Coordinates=O13, Trace=q156, [UWGC]  
FT /colour=7  
FT misc\_feature complement(6653184..6653185)  
FT /label=NR35.13  
FT /note=NR35.13, Exact (0), UWGC re-mapped on dapB deleted genome, [SBW25 April 05],Plate=P03, Coordinates=C1, Trace=q102, [UWGC]  
FT /colour=7  
FT misc\_feature complement(6653184..6653185)  
FT /label=NR35.83  
FT /note=NR35.83, Exact (0), UWGC re-mapped on dapB deleted genome, [SBW25 April 05],Plate=P03, Coordinates=M21, Trace=q187, [UWGC]  
FT /colour=7  
FT misc\_feature 6653200..6653199  
FT /label=NR35.49  
FT /note=NR35.49, Estimate (13), [SBW25 April 05],Plate=P03, Coordinates=I1, Trace=q105, [UWGC]  
FT /colour=7  
FT misc\_feature 6653205..6653204  
FT /label=NR35.96



FT /note=NR35.96, Exact (0), [SBW25 April 05],Plate=P03,  
Coordinates=O23, Trace=q196, [UWGC]  
FT /colour=7  
FT misc\_feature complement(6653215..6653216)  
FT /label=NR35.62  
FT /note=NR35.62, Estimate (0), [SBW25 April 05],Plate=P03,  
Coordinates=K3, Trace=q114, [UWGC]  
FT /colour=7  
FT misc\_feature complement(6653216..6653217)  
FT /label=NR35.23  
FT /note=NR35.23, Exact (0), [SBW25 April 05],Plate=P03,  
Coordinates=C21, Trace=q182, [UWGC]  
FT /colour=7  
FT misc\_feature complement(6653216..6653217)  
FT /label=NR35.88  
FT /note=NR35.88, Exact (0), [SBW25 April 05],Plate=P03,  
Coordinates=O7, Trace=q132, [UWGC]  
FT /colour=7  
FT misc\_feature 6653229..6653228  
FT /label=NR35.53  
FT /note=NR35.53, Estimate (34), [SBW25 April 05],Plate=P03,  
Coordinates=I9, Trace=q137, [UWGC]  
FT /colour=7  
FT misc\_feature 6653231..6653230  
FT /label=NR35.17  
FT /note=NR35.17, Estimate (78), [SBW25 April 05],Plate=P03,  
Coordinates=C9, Trace=q134, [UWGC]  
FT /colour=7  
FT misc\_feature 6653243..6653242  
FT /label=NR35.46  
FT /note=NR35.46, Estimate (131), [SBW25 April 05],Plate=P03,  
Coordinates=G19, Trace=q176, [UWGC]  
FT /colour=7  
FT misc\_feature complement(6653249..6653250)  
FT /label=NR35.50  
FT /note=NR35.50, Estimate (32), UWGC re-mapped on dapB  
deleted genome, [SBW25 April 05],Plate=P03, Coordinates=I3, Trace=q113, [UWGC]  
FT /colour=7  
FT misc\_feature complement(6653250..6653251)  
FT /label=NR35.95  
FT /note=NR35.95, Estimate (33), UWGC re-mapped on dapB  
deleted genome, [SBW25 April 05],Plate=P03, Coordinates=O21, Trace=q188, [UWGC]  
FT /colour=7  
FT misc\_feature 6653269..6653268  
FT /label=NR35.52  
FT /note=NR35.52, Exact (0), [SBW25 April 05],Plate=P03,  
Coordinates=I7, Trace=q129, [UWGC]  
FT /colour=7  
FT misc\_feature complement(6653270..6653271)  
FT /label=NR35.77  
FT /note=NR35.77, Exact (0), [SBW25 April 05],Plate=P03,  
Coordinates=M9, Trace=q139, [UWGC]  
FT /colour=7  
FT misc\_feature complement(6653282..6653283)  
FT /label=NR35.79  
FT /note=NR35.79, Exact (0), [SBW25 April 05],Plate=P03,  
Coordinates=M13, Trace=q155, [UWGC]

FT /colour=7  
FT misc\_feature complement(6653284..6653285)  
FT /label=NR35.24  
FT /note=NR35.24, Estimate (122), [SBW25 April 05],Plate=P03,  
Coordinates=C23, Trace=q190, [UWGC]  
FT /colour=7  
FT misc\_feature complement(6653287..6653288)  
FT /label=NR35.07  
FT /note=NR35.07, Exact (0), [SBW25 April 05],Plate=P03,  
Coordinates=A13, Trace=q149, [UWGC]  
FT /colour=7  
FT misc\_feature 6653289..6653288  
FT /label=NR35.74  
FT /note=NR35.74, Estimate (29), [SBW25 April 05],Plate=P03,  
Coordinates=M3, Trace=q115, [UWGC]  
FT /colour=7  
FT misc\_feature 6653290..6653289  
FT /label=NR35.20  
FT /note=NR35.20, Estimate (32), [SBW25 April 05],Plate=P03,  
Coordinates=C15, Trace=q158, [UWGC]  
FT /colour=7  
FT misc\_feature 6653295..6653294  
FT /label=NR35.10  
FT /note=NR35.10, Estimate (23), [SBW25 April 05],Plate=P03,  
Coordinates=A19, Trace=q173, [UWGC]  
FT /colour=7  
FT misc\_feature 6653297..6653296  
FT /label=NR35.09  
FT /note=NR35.09, Exact (0), [SBW25 April 05],Plate=P03,  
Coordinates=A17, Trace=q165, [UWGC]  
FT /colour=7  
FT misc\_feature 6653297..6653296  
FT /label=NR35.32  
FT /note=NR35.32, Exact (0), [SBW25 April 05],Plate=P03,  
Coordinates=E15, Trace=q159, [UWGC]  
FT /colour=7  
FT misc\_feature 6653300..6653299  
FT /label=NR35.67  
FT /note=NR35.67, Estimate (34), [SBW25 April 05],Plate=P03,  
Coordinates=K13, Trace=q154, [UWGC]  
FT /colour=7  
FT misc\_feature 6653306..6653305  
FT /label=NR35.76  
FT /note=NR35.76, Estimate (32), [SBW25 April 05],Plate=P03,  
Coordinates=M7, Trace=q131, [UWGC]  
FT /colour=7  
FT misc\_feature 6653307..6653306  
FT /label=NR35.15  
FT /note=NR35.15, Estimate (31), [SBW25 April 05],Plate=P03,  
Coordinates=C5, Trace=q118, [UWGC]  
FT /colour=7  
FT misc\_feature 6653308..6653307  
FT /label=NR35.89  
FT /note=NR35.89, Estimate (32), [SBW25 April 05],Plate=P03,  
Coordinates=O9, Trace=q140, [UWGC]  
FT /colour=7  
FT misc\_feature complement(6653308..6653309)

FT /label=NR35.59  
FT /note=NR35.59, Estimate (2), [SBW25 April 05],Plate=P03,  
Coordinates=I21, Trace=q185, [UWGC]  
FT /colour=7  
FT misc\_feature complement(6653308..6653309)  
FT /label=NR35.65  
FT /note=NR35.65, Exact (0), [SBW25 April 05],Plate=P03,  
Coordinates=K9, Trace=q138, [UWGC]  
FT /colour=7  
FT misc\_feature complement(6653309..6653310)  
FT /label=NR35.60  
FT /note=NR35.60, Estimate (35), [SBW25 April 05],Plate=P03,  
Coordinates=I23, Trace=q193, [UWGC]  
FT /colour=7  
FT misc\_feature complement(6653313..6653314)  
FT /label=NR35.61  
FT /note=NR35.61, Exact (0), [SBW25 April 05],Plate=P03,  
Coordinates=K1, Trace=q106, [UWGC]  
FT /colour=7  
FT misc\_feature 6653314..6653313  
FT /label=NR35.73  
FT /note=NR35.73, Estimate (25), [SBW25 April 05],Plate=P03,  
Coordinates=M1, Trace=q107, [UWGC]  
FT /colour=7  
FT misc\_feature complement(6653316..6653317)  
FT /label=NR35.29  
FT /note=NR35.29, Estimate (30), UWGC re-mapped on dapB  
deleted genome, [SBW25 April 05],Plate=P03, Coordinates=E9, Trace=q135, [UWGC]  
FT /colour=7  
FT misc\_feature 6653317..6653316  
FT /label=NR35.43  
FT /note=NR35.43, Estimate (34), [SBW25 April 05],Plate=P03,  
Coordinates=G13, Trace=q152, [UWGC]  
FT /colour=7  
FT misc\_feature 6653323..6653322  
FT /label=NR35.56  
FT /note=NR35.56, Estimate (28), [SBW25 April 05],Plate=P03,  
Coordinates=I15, Trace=q161, [UWGC]  
FT /colour=7  
FT misc\_feature 6653323..6653322  
FT /label=NR35.68  
FT /note=NR35.68, Estimate (76), [SBW25 April 05],Plate=P03,  
Coordinates=K15, Trace=q162, [UWGC]  
FT /colour=7  
FT misc\_feature 6653324..6653323  
FT /label=NR35.92  
FT /note=NR35.92, Estimate (77), [SBW25 April 05],Plate=P03,  
Coordinates=O15, Trace=q164, [UWGC]  
FT /colour=7  
FT misc\_feature complement(6653336..6653337)  
FT /label=NR35.12  
FT /note=NR35.12, Estimate (28), UWGC re-mapped on dapB  
deleted genome, [SBW25 April 05],Plate=P03, Coordinates=A23, Trace=q189, [UWGC]  
FT /colour=7  
FT misc\_feature 6653339..6653338  
FT /label=NR35.31

FT /note=NR35.31, Exact (0), [SBW25 April 05],Plate=P03,  
Coordinates=E13, Trace=q151, [UWGC]  
FT /colour=7  
FT misc\_feature 6653340..6653339  
FT /label=NR35.86  
FT /note=NR35.86, Estimate (0), [SBW25 April 05],Plate=P03,  
Coordinates=O3, Trace=q116, [UWGC]  
FT /colour=7  
FT misc\_feature 6653341..6653340  
FT /label=NR35.28  
FT /note=NR35.28, Exact (0), [SBW25 April 05],Plate=P03,  
Coordinates=E7, Trace=q127, [UWGC]  
FT /colour=7  
FT misc\_feature complement(6653351..6653352)  
FT /label=NR35.03  
FT /note=NR35.03, Estimate (0), [SBW25 April 05],Plate=P03,  
Coordinates=A5, Trace=q117, [UWGC]  
FT /colour=7  
FT misc\_feature complement(6653351..6653352)  
FT /label=NR35.33  
FT /note=NR35.33, Estimate (0), [SBW25 April 05],Plate=P03,  
Coordinates=E17, Trace=q167, [UWGC]  
FT /colour=7  
FT misc\_feature complement(6653352..6653353)  
FT /label=NR35.05  
FT /note=NR35.05, Exact (0), [SBW25 April 05],Plate=P03,  
Coordinates=A9, Trace=q133, [UWGC]  
FT /colour=7  
FT misc\_feature complement(6653352..6653353)  
FT /label=NR35.06  
FT /note=NR35.06, Exact (0), [SBW25 April 05],Plate=P03,  
Coordinates=A11, Trace=q141, [UWGC]  
FT /colour=7  
FT misc\_feature complement(6653352..6653353)  
FT /label=NR35.27  
FT /note=NR35.27, Exact (0), [SBW25 April 05],Plate=P03,  
Coordinates=E5, Trace=q119, [UWGC]  
FT /colour=7  
FT misc\_feature complement(6653352..6653353)  
FT /label=NR35.39  
FT /note=NR35.39, Exact (0), [SBW25 April 05],Plate=P03,  
Coordinates=G5, Trace=q120, [UWGC]  
FT /colour=7  
FT misc\_feature complement(6653352..6653353)  
FT /label=NR35.40  
FT /note=NR35.40, Exact (0), [SBW25 April 05],Plate=P03,  
Coordinates=G7, Trace=q128, [UWGC]  
FT /colour=7  
FT misc\_feature complement(6653352..6653353)  
FT /label=NR35.41  
FT /note=NR35.41, Exact (0), [SBW25 April 05],Plate=P03,  
Coordinates=G9, Trace=q136, [UWGC]  
FT /colour=7  
FT misc\_feature complement(6653352..6653353)  
FT /label=NR35.78  
FT /note=NR35.78, Exact (0), [SBW25 April 05],Plate=P03,  
Coordinates=M11, Trace=q147, [UWGC]

FT /colour=7  
 FT misc\_feature 6653358..6653357  
 FT /label=NR35.04  
 FT /note=NR35.04, Estimate (31), [SBW25 April 05],Plate=P03,  
 Coordinates=A7, Trace=q125, [UWGC]  
 FT /colour=7  
 FT misc\_feature 6653359..6653358  
 FT /label=NR35.48  
 FT /note=NR35.48, Estimate (33), [SBW25 April 05],Plate=P03,  
 Coordinates=G23, Trace=q192, [UWGC]  
 FT /colour=7  
 FT misc\_feature 6653367..6653366  
 FT /label=NR35.25  
 FT /note=NR35.25, Estimate (36), [SBW25 April 05],Plate=P03,  
 Coordinates=E1, Trace=q103, [UWGC]  
 FT /colour=7  
 FT misc\_feature complement(6653368..6653369)  
 FT /label=NR35.84  
 FT /note=NR35.84, Estimate (33), UWGC re-mapped on dapB  
 deleted genome, [SBW25 April 05],Plate=P03, Coordinates=M23, Trace=q195, [UWGC]  
 FT /colour=7  
 FT misc\_feature complement(6653370..6653371)  
 FT /label=NR35.38  
 FT /note=NR35.38, Exact (0), [SBW25 April 05],Plate=P03,  
 Coordinates=G3, Trace=q112, [UWGC]  
 FT /colour=7  
 FT misc\_feature complement(6653370..6653371)  
 FT /label=NR35.87  
 FT /note=NR35.87, Exact (0), [SBW25 April 05],Plate=P03,  
 Coordinates=O5, Trace=q124, [UWGC]  
 FT /colour=7  
 FT misc\_feature complement(6653379..6653380)  
 FT /label=NR35.85  
 FT /note=NR35.85, Estimate (27), UWGC re-mapped on dapB  
 deleted genome, [SBW25 April 05],Plate=P03, Coordinates=O1, Trace=q108, [UWGC]  
 FT /colour=7  
 FT misc\_feature complement(6653401..6653402)  
 FT /label=NR35.55  
 FT /note=NR35.55, Exact (0), [SBW25 April 05],Plate=P03,  
 Coordinates=I13, Trace=q153, [UWGC]  
 FT /colour=7  
 FT misc\_feature complement(6653423..6653424)  
 FT /label=NR35.44  
 FT /note=NR35.44, Estimate (0), [SBW25 April 05],Plate=P03,  
 Coordinates=G15, Trace=q160, [UWGC]  
 FT /colour=7  
 FT misc\_feature complement(6653434..6653435)  
 FT /label=NR35.45  
 FT /note=NR35.45, Estimate (1), [SBW25 April 05],Plate=P03,  
 Coordinates=G17, Trace=q168, [UWGC]  
 FT /colour=7  
 FT misc\_feature complement(6653434..6653435)  
 FT /label=NR35.58  
 FT /note=NR35.58, Exact (0), [SBW25 April 05],Plate=P03,  
 Coordinates=I19, Trace=q177, [UWGC]  
 FT /colour=7  
 FT misc\_feature complement(6653446..6653447)

FT /label=NR35.18  
 FT /note=NR35.18, Estimate (94), [SBW25 April 05],Plate=P03,  
 Coordinates=C11, Trace=q142, [UWGC]  
 FT /colour=7  
 FT misc\_feature complement(6653462..6653463)  
 FT /label=NR35.47  
 FT /note=NR35.47, Estimate (36), [SBW25 April 05],Plate=P03,  
 Coordinates=G21, Trace=q184, [UWGC]  
 FT /colour=7  
 FT misc\_feature complement(6653511..6653512)  
 FT /label=NR35.94  
 FT /note=NR35.94, Exact (0), [SBW25 April 05],Plate=P03,  
 Coordinates=O19, Trace=q180, [UWGC]  
 FT /colour=7  
 FT misc\_feature complement(6653515..6653516)  
 FT /label=NR35.69  
 FT /note=NR35.69, Estimate (0), [SBW25 April 05],Plate=P03,  
 Coordinates=K17, Trace=q170, [UWGC]  
 FT /colour=7  
 FT misc\_feature complement(6653526..6653527)  
 FT /label=NR35.81  
 FT /note=NR35.81, Estimate (24), [SBW25 April 05],Plate=P03,  
 Coordinates=M17, Trace=q171, [UWGC]  
 FT /colour=7  
 FT misc\_feature complement(6653529..6653530)  
 FT /label=NR35.93  
 FT /note=NR35.93, Estimate (27), [SBW25 April 05],Plate=P03,  
 Coordinates=O17, Trace=q172, [UWGC]  
 FT /colour=7  
 FT misc\_feature 6653575..6653574  
 FT /label=NR35.90  
 FT /note=NR35.90, Exact (0), [SBW25 April 05],Plate=P03,  
 Coordinates=O11, Trace=q148, [UWGC]  
 FT /colour=7  
 FT misc\_feature 6653652..6653651  
 FT /label=NR35.19  
 FT /note=NR35.19, Exact (0), [SBW25 April 05],Plate=P03,  
 Coordinates=C13, Trace=q150, [UWGC]  
 FT /colour=7  
 FT misc\_feature complement(6688422..6688423)  
 FT /label=NR42.09  
 FT /note=NR42.09, Exact (manual correction), [SBW25 April  
 05],Plate=P03, Coordinates=B18, Trace=q465, [UWGC]  
 FT /colour=7  
 FT misc\_feature 6713798..6713797  
 FT /label=NR12.62  
 FT /note=NR12.62, Exact (0), [SBW25 April 05],Plate=P01,  
 Coordinates=K4, Trace=q214, [UWGC]  
 FT /colour=7  
 FT misc\_feature 6718998..6718999  
 FT /label=NR39.55  
 FT /note=NR39.55, Exact (manual correction), [SBW25 April  
 05],Plate=P07, Coordinates=P14, Trace=q456, [UWGC]  
 FT /colour=7  
 FT misc\_feature complement(6719018..6719019)  
 FT /label=NR39.P05

FT /note=NR39.P05, Estimate (1), [SBW25 April 05],Plate=P05,  
Coordinates=L10, Trace=q438, [UWGC]  
FT /colour=7  
FT misc\_feature 6719023..6719022  
FT /label=NR39.P06  
FT /note=NR39.P06, Exact (0), [SBW25 April 05],Plate=P05,  
Coordinates=L12, Trace=q446, [UWGC]  
FT /colour=7  
FT misc\_feature complement(6719025..6719026)  
FT /label=NR39.39  
FT /note=NR39.39, Estimate (11), [SBW25 April 05],Plate=P07,  
Coordinates=P13, Trace=q356, [UWGC]  
FT /colour=7  
FT misc\_feature 6719029..6719028  
FT /label=NR39.38  
FT /note=NR39.38, Exact (0), [SBW25 April 05],Plate=P07,  
Coordinates=O13, Trace=q156, [UWGC]  
FT /colour=7  
FT misc\_feature 6719029..6719028  
FT /label=NR39.46  
FT /note=NR39.46, Estimate (2), [SBW25 April 05],Plate=P07,  
Coordinates=G14, Trace=q252, [UWGC]  
FT /colour=7  
FT misc\_feature complement(6719030..6719031)  
FT /label=NR39.33  
FT /note=NR39.33, Exact (0), [SBW25 April 05],Plate=P07,  
Coordinates=J13, Trace=q353, [UWGC]  
FT /colour=7  
FT misc\_feature complement(6719040..6719041)  
FT /label=NR39.40  
FT /note=NR39.40, Exact (0), [SBW25 April 05],Plate=P07,  
Coordinates=A14, Trace=q249, [UWGC]  
FT /colour=7  
FT misc\_feature 6719051..6719050  
FT /label=NR39.45  
FT /note=NR39.45, Exact (0), [SBW25 April 05],Plate=P07,  
Coordinates=F14, Trace=q451, [UWGC]  
FT /colour=7  
FT misc\_feature 6719051..6719050  
FT /label=NR39.47  
FT /note=NR39.47, Exact (0), [SBW25 April 05],Plate=P07,  
Coordinates=H14, Trace=q452, [UWGC]  
FT /colour=7  
FT misc\_feature complement(6719066..6719067)  
FT /label=NR39.37  
FT /note=NR39.37, Estimate (34), [SBW25 April 05],Plate=P07,  
Coordinates=N13, Trace=q355, [UWGC]  
FT /colour=7  
FT misc\_feature 6719121..6719120  
FT /label=NR39.43  
FT /note=NR39.43, Estimate (10), [SBW25 April 05],Plate=P07,  
Coordinates=D14, Trace=q450, [UWGC]  
FT /colour=7  
FT misc\_feature complement(6719156..6719157)  
FT /label=NR39.01  
FT /note=NR39.01, Exact (0), [SBW25 April 05],Plate=P05,  
Coordinates=B13, Trace=q349, [UWGC]

FT /colour=7  
FT misc\_feature 6719261..6719260  
FT /label=NR39.48  
FT /note=NR39.48, Estimate (24), [SBW25 April 05],Plate=P07,  
Coordinates=I14, Trace=q253, [UWGC]  
FT /colour=7  
FT misc\_feature complement(6719265..6719266)  
FT /label=NR39.P04  
FT /note=NR39.P04, Estimate (0), [SBW25 April 05],Plate=P05,  
Coordinates=L8, Trace=q430, [UWGC]  
FT /colour=7  
FT misc\_feature complement(6719266..6719267)  
FT /label=NR39.50  
FT /note=NR39.50, Exact (0), [SBW25 April 05],Plate=P07,  
Coordinates=K14, Trace=q254, [UWGC]  
FT /colour=7  
FT misc\_feature complement(6719276..6719277)  
FT /label=NR39.10  
FT /note=NR39.10, Exact (0), [SBW25 April 05],Plate=P05,  
Coordinates=D19, Trace=q374, [UWGC]  
FT /colour=7  
FT misc\_feature 6719348..6719347  
FT /label=NR39.41  
FT /note=NR39.41, Estimate (12), [SBW25 April 05],Plate=P07,  
Coordinates=B14, Trace=q449, [UWGC]  
FT /colour=7  
FT misc\_feature 6719348..6719347  
FT /label=NR39.P01  
FT /note=NR39.P01, Exact (0), [SBW25 April 05],Plate=P05,  
Coordinates=L2, Trace=q406, [UWGC]  
FT /colour=7  
FT misc\_feature 6719375..6719374  
FT /label=NR39.17  
FT /note=NR39.17, Exact (0), [SBW25 April 05],Plate=P05,  
Coordinates=F21, Trace=q383, [UWGC]  
FT /colour=7  
FT misc\_feature complement(6719384..6719385)  
FT /label=NR39.09  
FT /note=NR39.09, Estimate (25), [SBW25 April 05],Plate=P05,  
Coordinates=D17, Trace=q366, [UWGC]  
FT /colour=7  
FT misc\_feature complement(6719389..6719390)  
FT /label=NR39.34  
FT /note=NR39.34, Estimate (40), [SBW25 April 05],Plate=P07,  
Coordinates=K13, Trace=q154, [UWGC]  
FT /colour=7  
FT misc\_feature complement(6719416..6719417)  
FT /label=NR39.P01  
FT /note=NR39.P01, Estimate (14), [SBW25 April 05],Plate=P05,  
Coordinates=L2, Trace=q406, [UWGC]  
FT /colour=7  
FT misc\_feature complement(6719469..6719470)  
FT /label=NR39.28  
FT /note=NR39.28, Exact (0), [SBW25 April 05],Plate=P05,  
Coordinates=J19, Trace=q377, [UWGC]  
FT /colour=7  
FT misc\_feature 6719526..6719525



FT /label=NR39.19  
 FT /note=NR39.19, Estimate (24), UWGC re-mapped on dapB  
 deleted genome, [SBW25 April 05], Plate=P05, Coordinates=H13, Trace=q352, [UWGC]  
 FT /colour=7  
 FT misc\_feature 6719538..6719537  
 FT /label=NR39.08  
 FT /note=NR39.08, Estimate (24), UWGC re-mapped on dapB  
 deleted genome, [SBW25 April 05], Plate=P05, Coordinates=D15, Trace=q358, [UWGC]  
 FT /colour=7  
 FT misc\_feature 6719539..6719538  
 FT /label=NR39.54  
 FT /note=NR39.54, Estimate (9), [SBW25 April 05], Plate=P07,  
 Coordinates=O14, Trace=q256, [UWGC]  
 FT /colour=7  
 FT misc\_feature complement(6719539..6719540)  
 FT /label=NR39.29  
 FT /note=NR39.29, Exact (0), [SBW25 April 05], Plate=P05,  
 Coordinates=J21, Trace=q385, [UWGC]  
 FT /colour=7  
 FT misc\_feature 6719557..6719556  
 FT /label=NR39.06  
 FT /note=NR39.06, Exact (0), [SBW25 April 05], Plate=P05,  
 Coordinates=B23, Trace=q389, [UWGC]  
 FT /colour=7  
 FT misc\_feature 6719557..6719556  
 FT /label=NR39.13  
 FT /note=NR39.13, Exact (0), [SBW25 April 05], Plate=P05,  
 Coordinates=F13, Trace=q351, [UWGC]  
 FT /colour=7  
 FT misc\_feature 6719557..6719556  
 FT /label=NR39.15  
 FT /note=NR39.15, Exact (0), [SBW25 April 05], Plate=P05,  
 Coordinates=F17, Trace=q367, [UWGC]  
 FT /colour=7  
 FT misc\_feature 6719557..6719556  
 FT /label=NR39.23  
 FT /note=NR39.23, Exact (0), [SBW25 April 05], Plate=P05,  
 Coordinates=H21, Trace=q384, [UWGC]  
 FT /colour=7  
 FT misc\_feature 6719562..6719561  
 FT /label=NR39.24  
 FT /note=NR39.24, Exact (0), [SBW25 April 05], Plate=P05,  
 Coordinates=H23, Trace=q392, [UWGC]  
 FT /colour=7  
 FT misc\_feature 6719562..6719561  
 FT /label=NR39.35  
 FT /note=NR39.35, Estimate (3), [SBW25 April 05], Plate=P07,  
 Coordinates=L13, Trace=q354, [UWGC]  
 FT /colour=7  
 FT misc\_feature 6719562..6719561  
 FT /label=NR39.M5.05  
 FT /note=NR39.M5.05, Exact (0), [SBW25 April 05], Plate=PM5.1,  
 Coordinates=H11, Trace=C535, [Oxford]  
 FT /colour=10  
 FT misc\_feature 6719563..6719562  
 FT /label=NR39.36

FT /note=NR39.36, Estimate (2), [SBW25 April 05],Plate=P07,  
 Coordinates=M13, Trace=q155, [UWGC]  
 FT /colour=7  
 FT misc\_feature 6719567..6719566  
 FT /label=NR39.07  
 FT /note=NR39.07, Exact (0), UWGC re-mapped on dapB deleted  
 genome, [SBW25 April 05],Plate=P05, Coordinates=D13, Trace=q350, [UWGC]  
 FT /colour=7  
 FT misc\_feature 6719567..6719566  
 FT /label=NR39.M5.12  
 FT /note=NR39.M5.12, Exact (0), [SBW25 April 05],Plate=PM5.2,  
 Coordinates=A6, Trace=C584, [Oxford]  
 FT /colour=10  
 FT misc\_feature complement(6719568..6719569)  
 FT /label=NR39.03  
 FT /note=NR39.03, Exact (0), [SBW25 April 05],Plate=P05,  
 Coordinates=B17, Trace=q365, [UWGC]  
 FT /colour=7  
 FT misc\_feature complement(6719568..6719569)  
 FT /label=NR39.20  
 FT /note=NR39.20, Exact (0), [SBW25 April 05],Plate=P05,  
 Coordinates=H15, Trace=q360, [UWGC]  
 FT /colour=7  
 FT misc\_feature complement(6719568..6719569)  
 FT /label=NR39.21  
 FT /note=NR39.21, Exact (0), [SBW25 April 05],Plate=P05,  
 Coordinates=H17, Trace=q368, [UWGC]  
 FT /colour=7  
 FT misc\_feature complement(6719568..6719569)  
 FT /label=NR39.51  
 FT /note=NR39.51, Estimate (17), [SBW25 April 05],Plate=P07,  
 Coordinates=L14, Trace=q454, [UWGC]  
 FT /colour=7  
 FT misc\_feature complement(6719569..6719570)  
 FT /label=NR39.56  
 FT /note=NR39.56, Estimate (18), [SBW25 April 05],Plate=P07,  
 Coordinates=A15, Trace=q157, [UWGC]  
 FT /colour=7  
 FT misc\_feature complement(6719572..6719573)  
 FT /label=NR39.18  
 FT /note=NR39.18, Estimate (0), [SBW25 April 05],Plate=P05,  
 Coordinates=F23, Trace=q391, [UWGC]  
 FT /colour=7  
 FT misc\_feature complement(6719573..6719574)  
 FT /label=NR39.27  
 FT /note=NR39.27, Exact (0), [SBW25 April 05],Plate=P05,  
 Coordinates=J17, Trace=q369, [UWGC]  
 FT /colour=7  
 FT misc\_feature complement(6719573..6719574)  
 FT /label=NR39.P03  
 FT /note=NR39.P03, Exact (0), [SBW25 April 05],Plate=P05,  
 Coordinates=L6, Trace=q422, [UWGC]  
 FT /colour=7  
 FT misc\_feature 6719578..6719577  
 FT /label=NR39.M5.10  
 FT /note=NR39.M5.10, Exact (0), [SBW25 April 05],Plate=PM5.2,  
 Coordinates=A4, Trace=C568, [Oxford]

FT /colour=10  
FT misc\_feature complement(6719591..6719592)  
FT /label=NR39.04  
FT /note=NR39.04, Estimate (23), [SBW25 April 05],Plate=P05,  
Coordinates=B19, Trace=NR39\_04, [Oxford]  
FT /colour=7  
FT misc\_feature complement(6719597..6719598)  
FT /label=NR39.02  
FT /note=NR39.02, Estimate (18), [SBW25 April 05],Plate=P05,  
Coordinates=B15, Trace=NR39\_02, [Oxford]  
FT /colour=7  
FT misc\_feature complement(6719597..6719598)  
FT /label=NR39.26  
FT /note=NR39.26, Estimate (23), [SBW25 April 05],Plate=P05,  
Coordinates=J15, Trace=q361, [UWGC]  
FT /colour=7  
FT misc\_feature 6719629..6719628  
FT /label=NR39.22  
FT /note=NR39.22, Exact (manual correction), [SBW25 April  
05],Plate=P05, Coordinates=H19, Trace=q376, [UWGC]  
FT /colour=7  
FT misc\_feature 6719629..6719628  
FT /label=NR39.52  
FT /note=NR39.52, Exact (0), [SBW25 April 05],Plate=P07,  
Coordinates=M14, Trace=q255, [UWGC]  
FT /colour=7  
FT misc\_feature 6719629..6719628  
FT /label=NR39.M5.02  
FT /note=NR39.M5.02, Exact (0), [SBW25 April 05],Plate=PM5.1,  
Coordinates=H8, Trace=C510, [Oxford]  
FT /colour=10  
FT misc\_feature 6719639..6719638  
FT /label=NR39.16  
FT /note=NR39.16, Exact (manual correction), [SBW25 April  
05],Plate=P05, Coordinates=F19, Trace=q375, [UWGC]  
FT /colour=7  
FT misc\_feature complement(6719639..6719640)  
FT /label=NR39.31  
FT /note=NR39.31, Estimate (0), [SBW25 April 05],Plate=P05,  
Coordinates=L13, Trace=q354, [UWGC]  
FT /colour=7  
FT misc\_feature complement(6719640..6719641)  
FT /label=NR39.P02  
FT /note=NR39.P02, Exact (manual correction), [SBW25 April  
05],Plate=P05, Coordinates=L4, Trace=q414, [UWGC]  
FT /colour=7  
FT misc\_feature complement(6719640..6719641)  
FT /label=NR39.49  
FT /note=NR39.49, Exact (manual correction), [SBW25 April  
05],Plate=P07, Coordinates=J14, Trace=q453, [UWGC]  
FT /colour=7  
FT misc\_feature 6719649..6719648  
FT /label=NR39.M5.06  
FT /note=NR39.M5.06,MCS hit  
=GATCTGCAGGTCGAGCGCT^TAATTAAGTAGTCGAGTTGGGTATG, [SBW25 April 05],Plate=PM5.1,  
Coordinates=H12, Trace=C543, [Oxford]  
FT /colour=10

FT misc\_feature 6719649..6719648  
FT /label=NR39.M5.09  
FT /note=NR39.M5.09,MCS hit  
=GATCTGCAGGTCGAGCGCT^TAATTAAGTTCGAGTTGGGTATG, [SBW25 April 05],Plate=PM5.2,  
Coordinates=A3, Trace=C560, [Oxford]  
FT /colour=10  
FT misc\_feature complement(6719650..6719651)  
FT /label=NR39.11  
FT /note=NR39.11, Exact (0), [SBW25 April 05],Plate=P05,  
Coordinates=D21, Trace=q382, [UWGC]  
FT /colour=7  
FT misc\_feature complement(6719650..6719651)  
FT /label=NR39.14  
FT /note=NR39.14, Exact (0), [SBW25 April 05],Plate=P05,  
Coordinates=F15, Trace=q359, [UWGC]  
FT /colour=7
