# Supplementary material
Source: PubMed Central journal article supplement (PMC2084328)

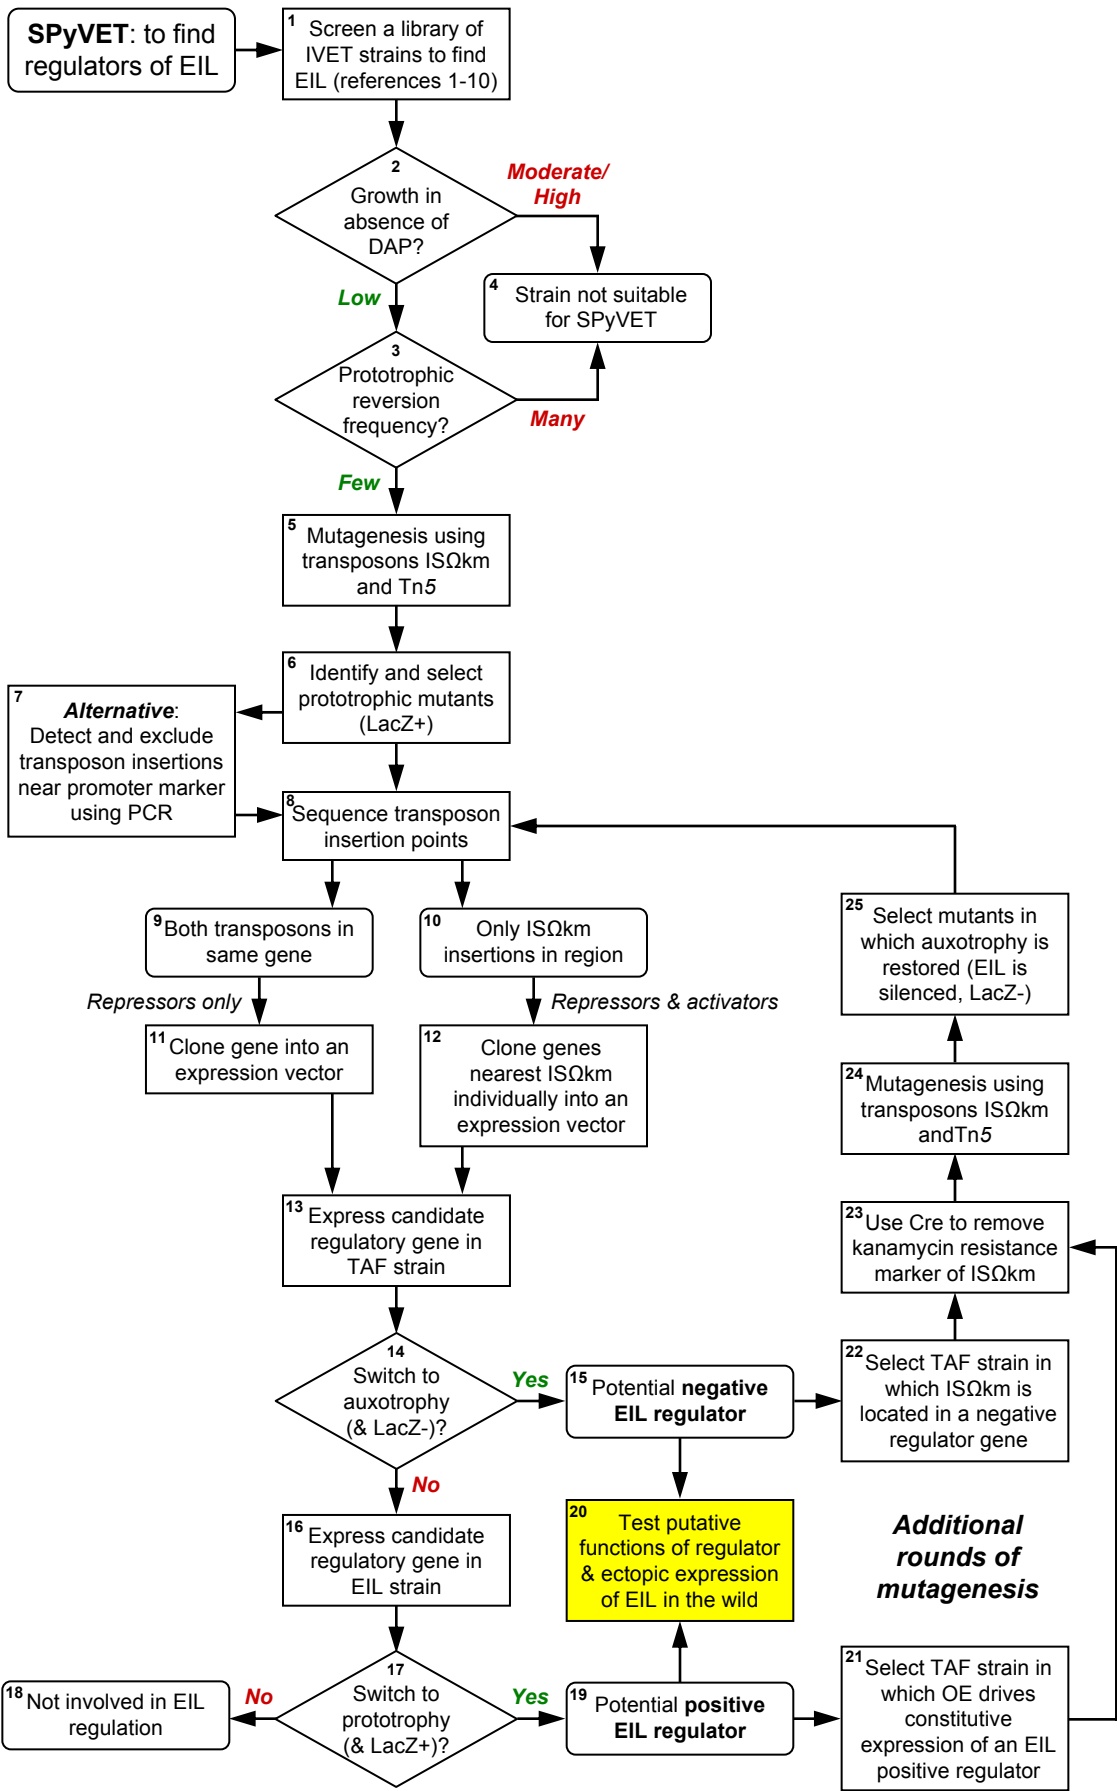

Supplement: pnas_0706739104_1.pdf [file pnas_0706739104_1.pdf]

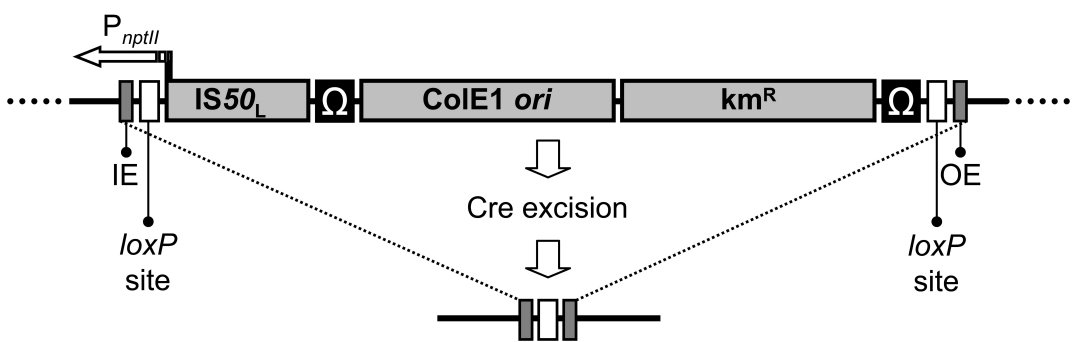

Supplement: pnas_0706739104_2.pdf [file pnas_0706739104_2.pdf]
